# Supplementary material
Source: publisher site journal article supplement (https://www.spandidos-publications.com/287/downloadSupplementary)
Supplement: Supplementary file 1 [file downloadSupplementary]

## Sheet: lncRNA
ProbeName	pvalues	Foldchange	Type	Result_source	Sources	Chr	Start	End	Strand	Cis_gene	Trans_gene	Cis_region	Relation
CUST_30139_PI429285431	0.0352021	17.0149	lncRNA	NONCODERv3	>n334787|AJ227913|mRNAlikelncRNA|Homosapiens|NULL|H-invitationalv7.5|HIT000245062|http://h-invitational.jp/hinv/spsoup/transcript_view?hit_id=HIT000245062|-1.2482000|-0.5958696	chr4	74608855	74609067	+	IL8	NA	chr4:74606223-74609433	inner
CUST_34366_PI429285431	0.0158802	10.9705	lncRNA	NONCODERv3	>n341234|AK001903|mRNAlikelncRNA|Homosapiens|HumanlncRNA|JounralRNA|3702|NULL|-1.0615200|-0.3357324	chr7	41724712	41726643	-	INHBA	NA	chr7:41728601-41736643	inter
LNCA_21_P0013868	0.0340855	9.33172	lncRNA	Agilent_HUMAN_G3V2	THC2686626	NA	NA	NA	+	NA	NA	NA	Unknown
LNCA_21_P0009582	0.00775948	8.44962	lncRNA	Agilent_HUMAN_G3V2	TCONS_00026568	chr18	73219929	73219988	-	NA	NA	NA	Unknown
CUST_7400_PI429285431	0.0378233	7.83328	lncRNA	lncipedia2.1	>lnc-COL20A1-2:1	chr20	62026221	62028390	+	NA	NA	NA	inter
CUST_7073_PI429285431	0.0201811	7.74143	lncRNA	gencode_v17	>transcript_id "ENST00000604411.1" | genecode_v17	chrX	73015040	73018039	+	NA	hg19_refFlat_JAM2:range=chr21:27012134-270866175'pad=0,hg19_refFlat_JAM2:range=chr21:27012134-270866175'pad=0 3'pad=0 strand=+ repeatMasking=none,-77.70;hg19_refFlat_UGT2A1:range=chr4:70455090-705133625'pad=0,hg19_refFlat_UGT2A1:range=chr4:70455090-705133625'pad=0 3'pad=0 strand=- repeatMasking=none,-82.30;hg19_refFlat_YIF1B:range=chr19:38796129-388065575'pad=0,hg19_refFlat_YIF1B:range=chr19:3879…	NA	inter
CUST_15643_PI429285431	0.00593035	7.71016	lncRNA	lncipedia2.1	>lnc-AP000769.1-1:1	chr11	65220340	65221047	+	NA	NA	NA	inter
LNCA_21_P0009516	0.00760535	7.60692	lncRNA	Agilent_HUMAN_G3V2	TCONS_00026396	chr18	3462264	3462323	-	NA	NA	NA	Unknown
LNCA_21_P0007047	0.0262205	7.526	lncRNA	Agilent_HUMAN_G3V2	TCONS_00018683	chr10	20895265	20895981	+	NA	NA	NA	Unknown
LNCA_21_P0010904	0.0119326	7.16024	lncRNA	Agilent_HUMAN_G3V2	TCONS_l2_00003767	chr10	114073774	114073833	-	NA	NA	NA	Unknown
LNCA_21_P0009428	0.00595517	6.91428	lncRNA	Agilent_HUMAN_G3V2	XR_110155	chr18	73408234	73408293	-	NA	NA	NA	Unknown
LNCA_21_P0014783	0.0254887	6.58996	lncRNA	Agilent_HUMAN_G3V2	XR_132565	chr9	93969446	93969505	-	NA	NA	NA	Unknown
CUST_46320_PI429285431	0.0182375	6.41819	lncRNA	ncbi	>gi|395455076|ref|NR_073034.1| Homo sapiens orthodenticle homeobox 2 (OTX2), transcript variant 6, non-coding RNA	Chr14	57267425	57269467	-	NA	NA	NA	inter
LNCA_33_P3795524	0.00191177	6.23208	lncRNA	Agilent_HUMAN_G3V2	XR_110000	chr3	46601116	46601175	+	NA	NA	NA	Unknown
CUST_46162_PI429285431	0.0100298	5.93231	lncRNA	ncbi	>gi|397139478|ref|XR_109113.2| PREDICTED: Homo sapiens uncharacterized LOC100128276 (LOC100128276), misc_RNA	Chr12	129325443	129328133	-	NA	NA	NA	inter
LNCA_21_P0001602	0.0139534	5.91745	lncRNA	Agilent_HUMAN_G3V2	THC2750242	chr1	185532218	185532277	-	NA	NA	NA	Unknown
CUST_5805_PI429285431	0.0389484	5.89949	lncRNA	gencode_v17	>transcript_id "ENST00000578650.1" | genecode_v17	chr17	29910181	29910748	+	NA	hg19_refFlat_ZNF829:range=chr19:37382394-374068565'pad=0,hg19_refFlat_ZNF829:range=chr19:37382394-374068565'pad=0 3'pad=0 strand=- repeatMasking=none,-69.40;hg19_refFlat_FBLIM1:range=chr1:16091479-161015265'pad=0,hg19_refFlat_FBLIM1:range=chr1:16091479-161015265'pad=0 3'pad=0 strand=+ repeatMasking=none,-89.10;hg19_refFlat_TSFM:range=chr12:58176585-581903665'pad=0,hg19_refFlat_TSFM:range=chr12:58…	NA	inter
LNCA_21_P0009517	0.000911475	5.86737	lncRNA	Agilent_HUMAN_G3V2	XR_111763	chr18	6728887	6728946	-	NA	NA	NA	Unknown
CUST_14661_PI429285431	0.014982	5.84779	lncRNA	lncipedia2.1	>lnc-OBFC2A-2:1	chr2	192502050	192502498	+	NA	NA	NA	inter
LNCA_21_P0013203	0.0309163	5.8423	lncRNA	Agilent_HUMAN_G3V2	TCONS_l2_00025908	chr7	62837851	62837910	+	NA	NA	NA	Unknown
CUST_36708_PI429285431	0.037173	5.82266	lncRNA	NONCODERv3	>n345196|NULL|lincRNA|Homosapiens|HumanlincRNA|ScriptureReconstructionLincRNAsByLuo[unpublished]|linc_luo_745|NULL|-1.3303300|-0.3052759	chr13	89063051	89064548	+	NA	NA	NA	inter
CUST_42225_PI429285431	0.02689	5.6871	lncRNA	ensembl.GRCh37.72	>ENST00000584034 ncrna:miRNA chromosome:GRCh37:1:67094123:67094200:1 gene:ENSG00000264720 gene_biotype:miRNA transcript_biotype:miRNA	chr1	67094123	67094200	+	SGIP1	NA	chr1:67084123-67104200	inner
CUST_30103_PI429285431	0.0183755	5.68037	lncRNA	NONCODERv3	>n334646|AB107271|mRNAlikelncRNA|Homosapiens|NULL|H-invitationalv7.5|HIT000242307|http://h-invitational.jp/hinv/spsoup/transcript_view?hit_id=HIT000242307|0.4491470|-0.2945049	chr3	12330337	12330762	+	PPARG	NA	chr3:12329349-12431333	inner
LNCA_21_P0007219	0.00294998	5.60232	lncRNA	Agilent_HUMAN_G3V2	TCONS_00019322	chr11	65220720	65220779	+	NA	NA	NA	Unknown
CUST_30334_PI429285431	0.0066295	5.58537	lncRNA	NONCODERv3	>n335250|AY562998|mRNAlikelncRNA|Homosapiens|NULL|H-invitationalv7.5|HIT000255509|http://h-invitational.jp/hinv/spsoup/transcript_view?hit_id=HIT000255509|-1.1101800|-0.3259261	chr8	15601082	15601530	+	TUSC3	NA	chr8:15591082-15624158	inner
LNCA_21_P0012271	0.0187596	5.57324	lncRNA	Agilent_HUMAN_G3V2	TCONS_l2_00017796	chr22	43805672	43805731	+	NA	NA	NA	Unknown
CUST_17356_PI429285431	0.00396027	5.56881	lncRNA	lncipedia2.1	>lnc-COL5A1-2:1	chr9	137475038	137477435	+	NA	NA	NA	inter
CUST_2171_PI429285431	0.0384456	5.4469	lncRNA	gencode_v17	>transcript_id "ENST00000511474.1" | genecode_v17	chr5	61173936	61174389	+	NA	NA	NA	inter
CUST_84_PI429285431	0.0287689	5.43956	lncRNA	gencode_v17	>transcript_id "ENST00000317008.4" | genecode_v17	chr18	77398928	77400028	-	CTDP1	NA	chr18:77439801-77449745	inter
CUST_18976_PI429285431	0.0437783	5.34273	lncRNA	lncipedia2.1	>lnc-WFIKKN2-1:4	chr17	48986933	48987622	+	NA	NA	NA	inter
CUST_14440_PI429285431	0.0263321	5.18421	lncRNA	lncipedia2.1	>lnc-FAM110B-1:2	chr8	59131474	59131679	+	NA	NA	NA	inter
CUST_11943_PI429285431	0.0390624	5.18042	lncRNA	lncipedia2.1	>lnc-WDR11-2:2	chr10	122714013	122714322	+	NA	NA	NA	inter
LNCA_21_P0008323	0.0453041	5.17931	lncRNA	Agilent_HUMAN_G3V2	TCONS_00022477	chr14	38073536	38075903	+	NA	NA	NA	Unknown
LNCA_21_P0007105	0.0151612	5.17221	lncRNA	Agilent_HUMAN_G3V2	ENST00000427247	chr10	71767257	71767316	-	NA	NA	NA	Unknown
CUST_17667_PI429285431	0.0246813	5.17117	lncRNA	lncipedia2.1	>lnc-WDR11-2:3	chr10	122713957	122714322	+	NA	NA	NA	inter
CUST_441_PI429285431	0.0413538	5.08876	lncRNA	gencode_v17	>transcript_id "ENST00000595668.1" | genecode_v17	chr1	147635156	147635950	+	NA	NA	NA	inter
LNCA_21_P0012544	0.0145979	5.08411	lncRNA	Agilent_HUMAN_G3V2	ENST00000482721	chr3	84851853	84917757	-	NA	NA	NA	Unknown
LNCA_21_P0003128	0.00745611	4.98022	lncRNA	Agilent_HUMAN_G3V2	THC2742095	chr3	70654604	70654663	-	NA	NA	NA	Unknown
CUST_26037_PI429285431	0.000643654	4.95903	lncRNA	lncipedia2.1	>lnc-PCM1-2:1	chr8	17739790	17740318	+	FGL1	hg19_refFlat_FGL1:range=chr8:17722101-177430635'pad=0,hg19_refFlat_FGL1:range=chr8:17722101-177430635'pad=0 3'pad=0 strand=- repeatMasking=none,-98.90chr8:17729790-17750170	NA	inner
LNCA_21_P0001067	0.0234329	4.92355	lncRNA	Agilent_HUMAN_G3V2	ENST00000435108	chr1	223318237	223318296	+	NA	NA	NA	Unknown
LNCA_21_P0005114	0.0315795	4.89888	lncRNA	Agilent_HUMAN_G3V2	ENST00000526556	chr6	33881925	33881984	+	NA	NA	NA	Unknown
LNCA_21_P0007614	0.00681675	4.89484	lncRNA	Agilent_HUMAN_G3V2	TCONS_00020541	chr12	103344618	103345223	+	NA	NA	NA	Unknown
CUST_265_PI429285431	0.029009	4.88671	lncRNA	gencode_v17	>transcript_id "ENST00000455304.2" | genecode_v17	chr1	63655660	63656757	-	FOXD3	NA	chr1:63788730-63790797	inter
LNCA_21_P0003651	0.022733	4.88548	lncRNA	Agilent_HUMAN_G3V2	TCONS_00008252	chr4	129581792	129581851	+	NA	NA	NA	Unknown
CUST_46915_PI429285431	0.0191954	4.72398	lncRNA	ncbi	>gi|241896901|ref|NR_027751.1| Homo sapiens family with sequence similarity 20, member A (FAM20A), transcript variant 2, non-coding RNA	Chr17	66534257	66534968	-	NA	NA	NA	inter
CUST_4150_PI429285431	0.0210672	4.71984	lncRNA	gencode_v17	>transcript_id "ENST00000538430.1" | genecode_v17	chr12	5497755	5499159	+	NA	NA	NA	inter
CUST_7050_PI429285431	0.00829596	4.69519	lncRNA	gencode_v17	>transcript_id "ENST00000602461.1" | genecode_v17	chrX	45604639	45606017	-	NA	NA	NA	inter
LNCA_21_P0002351	0.0016147	4.69429	lncRNA	Agilent_HUMAN_G3V2	TCONS_00004023	chr2	217668077	217668136	+	NA	NA	NA	Unknown
CUST_16890_PI429285431	0.0150532	4.68327	lncRNA	lncipedia2.1	>lnc-C18orf62-2:1	chr18	73221840	73222066	-	NA	NA	NA	inter
LNCA_21_P0012472	0.0255393	4.65606	lncRNA	Agilent_HUMAN_G3V2	BC050282	chr3	184476257	184476316	-	NA	NA	NA	Unknown
LNCA_21_P0006220	0.00709629	4.6413	lncRNA	Agilent_HUMAN_G3V2	TCONS_00016144	chr9	121739674	121742600	+	NA	NA	NA	Unknown
LNCA_21_P0008065	0.0198117	4.63626	lncRNA	Agilent_HUMAN_G3V2	TCONS_00021794	chr13	53650713	53650772	+	NA	NA	NA	Unknown
CUST_116_PI429201921	0.0247269	4.62859	lncRNA	Affy_HUMAN_HTA2.0	linc-FAM75A7-10	chr9	65880532	65883885	-	NA	NA	NA	Unknown
CUST_12898_PI429285431	0.0280786	4.62283	lncRNA	lncipedia2.1	>lnc-ASPH-2:2	chr8	62732012	62734603	-	NA	NA	NA	inter
CUST_14259_PI429285431	0.00214358	4.60518	lncRNA	lncipedia2.1	>lnc-GADD45G-5:1	chr9	92749463	92749927	+	NA	NA	NA	inter
CUST_45380_PI429285431	0.0143905	4.58467	lncRNA	ncbi	>gi|341915489|ref|XR_132565.1| PREDICTED: Homo sapiens uncharacterized LOC100507137 (FP2234), misc_RNA	NA	NA	NA	NA	NA	hg19_refFlat_ZMAT1:range=chrX:101138482-1011736065'pad=0,hg19_refFlat_ZMAT1:range=chrX:101138482-1011736065'pad=0 3'pad=0 strand=- repeatMasking=none,-79.80;hg19_refFlat_NPC1L1:range=chr7:44553046-445808585'pad=0,hg19_refFlat_NPC1L1:range=chr7:44553046-445808585'pad=0 3'pad=0 strand=- repeatMasking=none,-71.40;hg19_refFlat_ZNF410:range=chr14:74358879-743915065'pad=0,hg19_refFlat_ZNF410:range=chr1…	NA	Unknown
LNCA_21_P0009569	0.0374679	4.54768	lncRNA	Agilent_HUMAN_G3V2	TCONS_00026548	chr18	63921964	63922023	-	NA	NA	NA	Unknown
LNCA_21_P0001293	0.0245094	4.53646	lncRNA	Agilent_HUMAN_G3V2	TCONS_00000933	chr1	50723817	50723876	+	NA	NA	NA	Unknown
CUST_10626_PI429285431	0.0252142	4.51277	lncRNA	lncipedia2.1	>lnc-FAM110B-1:1	chr8	59131474	59132066	+	NA	NA	NA	inter
CUST_6388_PI429285431	0.0364115	4.49819	lncRNA	gencode_v17	>transcript_id "ENST00000599524.1" | genecode_v17	chr19	21776487	21776923	-	NA	NA	NA	inter
LNCA_21_P0007048	0.049445	4.48697	lncRNA	Agilent_HUMAN_G3V2	TCONS_00018684	chr10	20895266	20896027	+	NA	NA	NA	Unknown
CUST_29824_PI429285431	0.0421662	4.48005	lncRNA	NONCODERv3	>n333545|D16366|mRNAlikelncRNA|Homosapiens|NULL|H-invitationalv7.5|HIT000100583|http://h-invitational.jp/hinv/spsoup/transcript_view?hit_id=HIT000100583|-1.1234600|-0.2712278	chr19	45978196	45978438	+	FOSB	NA	chr19:45971253-45978437	inner
CUST_23236_PI429285431	0.0263741	4.46652	lncRNA	lncipedia2.1	>lnc-PHF3-2:1	chr6	65122529	65123053	+	EYS	NA	chr6:65112529-65132672	inner
CUST_6588_PI429285431	0.0013211	4.45507	lncRNA	gencode_v17	>transcript_id "ENST00000594721.1" | genecode_v17	chr19	55402039	55402786	+	FCAR	hg19_refFlat_CC2D2A:range=chr4:15477557-154829095'pad=0,hg19_refFlat_CC2D2A:range=chr4:15477557-154829095'pad=0 3'pad=0 strand=+ repeatMasking=none,-80.10;hg19_refFlat_SEPP1:range=chr5:42800822-428108695'pad=0,hg19_refFlat_SEPP1:range=chr5:42800822-428108695'pad=0 3'pad=0 strand=- repeatMasking=none,-78.80;hg19_refFlat_NANOGNB:range=chr12:7917882-79264475'pad=0,hg19_refFlat_NANOGNB:range=chr12:79…	NA	inter
CUST_13864_PI429285431	0.045978	4.43949	lncRNA	lncipedia2.1	>lnc-PLXDC2-1:2	chr10	20896006	20896254	+	NA	NA	NA	inter
CUST_31159_PI429285431	0.0178561	4.43229	lncRNA	NONCODERv3	>n337547|EF491789|mRNAlikelncRNA|Homosapiens|NULL|H-invitationalv7.5|HIT000395516|http://h-invitational.jp/hinv/spsoup/transcript_view?hit_id=HIT000395516|1.3148500|-0.1683662	chr6	152163737	152163978	+	ESR1	NA	chr6:152153737-152184803	inner
CUST_28927_PI429285431	0.0246947	4.41384	lncRNA	NONCODERv3	>n326352|NULL|mRNAlikelncRNA|Homosapiens|vegalncRNA|GENCODE|OTTHUMT00000083637|http://vega.sanger.ac.uk/Homo_sapiens/Transcript/Summary?db=core;t=OTTHUMT00000083637|-1.2356000|-0.4974211	chr1	163834323	163834814	+	NA	NA	NA	inter
CUST_33130_PI429285431	0.0139816	4.38459	lncRNA	NONCODERv3	>n339819|AF085831|mRNAlikelncRNA|Homosapiens|HumanlncRNA|JounralRNA|2266|NULL|-1.2899300|-0.4066175	chr18	28638805	28639361	-	DSC2	NA	chr18:28645942-28649359	inter
LNCA_21_P0002589	0.00705989	4.34536	lncRNA	Agilent_HUMAN_G3V2	TCONS_00004755	chr2	38636267	38636326	+	NA	NA	NA	Unknown
LNCA_21_P0002696	0.013592	4.32956	lncRNA	Agilent_HUMAN_G3V2	TCONS_00005379	chr2	243000131	243000190	-	NA	NA	NA	Unknown
CUST_22308_PI429285431	0.00392559	4.28579	lncRNA	lncipedia2.1	>lnc-AC127496.3-5:2	chr17	78943514	78945604	-	RPTOR	NA	chr17:78933514-78940173	inter
CUST_19699_PI429285431	0.0213749	4.28208	lncRNA	lncipedia2.1	>lnc-AC136428.1.1-7:1	chr16	33206606	33206867	-	LOC653550	NA	chr16:33196606-33207559	inner
LNCA_21_P0001262	0.0479356	4.28033	lncRNA	Agilent_HUMAN_G3V2	TCONS_00000839	chr1	11438245	11438304	+	NA	NA	NA	Unknown
LNCA_21_P0005700	0.0427322	4.27911	lncRNA	Agilent_HUMAN_G3V2	TCONS_00014720	chr8	59131576	59131635	+	NA	NA	NA	Unknown
LNCA_21_P0003894	0.00051468	4.22419	lncRNA	Agilent_HUMAN_G3V2	ENST00000508563	chr4	43459580	43459639	-	NA	NA	NA	Unknown
LNCA_21_P0003899	0.0425046	4.22233	lncRNA	Agilent_HUMAN_G3V2	TCONS_00009086	chr4	95668941	95676005	-	NA	NA	NA	Unknown
CUST_33205_PI429285431	0.00852891	4.21959	lncRNA	NONCODERv3	>n339901|BC071787|mRNAlikelncRNA|Homosapiens|HumanlncRNA|JounralRNA|2350|NULL|-0.9533570|-0.2996915	chr18	59475299	59476978	-	RNF152	NA	chr18:59482304-59486953	inter
LNCA_21_P0001759	0.000352805	4.19895	lncRNA	Agilent_HUMAN_G3V2	TCONS_00002599	chr1	223267551	223267610	-	NA	NA	NA	Unknown
CUST_36328_PI429285431	0.0128218	4.17547	lncRNA	NONCODERv3	>n344854|NULL|lincRNA|Homosapiens|HumanlincRNA|ScriptureReconstructionLincRNAsByLuo[unpublished]|linc_luo_403|NULL|-1.3050000|-0.2245766	chr5	141666533	141667557	-	NA	hg19_refFlat_SLC4A8:range=chr12:51844689-518740065'pad=0,hg19_refFlat_SLC4A8:range=chr12:51844689-518740065'pad=0 3'pad=0 strand=+ repeatMasking=none,-76.20;hg19_refFlat_PPIP5K1:range=chr15:43826872-438767025'pad=0,hg19_refFlat_PPIP5K1:range=chr15:43826872-438767025'pad=0 3'pad=0 strand=- repeatMasking=none,-41.70;hg19_refFlat_BIRC5:range=chr17:76210398-762196355'pad=0,hg19_refFlat_BIRC5:range=ch…	NA	inter
CUST_36763_PI429285431	0.0176798	4.1471	lncRNA	NONCODERv3	>n345243|NULL|lincRNA|Homosapiens|HumanlincRNA|ScriptureReconstructionLincRNAsByLuo[unpublished]|linc_luo_792|NULL|-1.4140800|-0.3583028	chr14	42881775	42883920	+	NA	NA	NA	inter
CUST_9583_PI429285431	0.00112837	4.11309	lncRNA	lncipedia2.1	>lnc-PREX1-6:2	chr20	46988228	46988778	-	NA	NA	NA	inter
CUST_11770_PI429285431	0.00150669	4.09898	lncRNA	lncipedia2.1	>lnc-AF127577.1-5:1	chr21	16214102	16217101	+	NA	NA	NA	inter
CUST_32693_PI429285431	0.00970324	4.07858	lncRNA	NONCODERv3	>n339322|AK022229|mRNAlikelncRNA|Homosapiens|HumanlncRNA|JounralRNA|1754|NULL|-1.0184600|-0.1776830	chr16	86628794	86631244	+	NA	NA	NA	inter
CUST_18124_PI429285431	0.00705897	4.06318	lncRNA	lncipedia2.1	>lnc-UCHL5-1:3	chr1	192924120	192924394	-	NA	NA	NA	inter
LNCA_21_P0003198	0.00362476	4.03289	lncRNA	Agilent_HUMAN_G3V2	TCONS_00006725	chr3	186184211	186184270	-	NA	NA	NA	Unknown
CUST_33870_PI429285431	0.00723529	4.02519	lncRNA	NONCODERv3	>n340658|AJ406936|mRNAlikelncRNA|Homosapiens|HumanlncRNA|JounralRNA|3120|NULL|3.1647900|-0.1845017	chr17	39315904	39317002	-	KRTAP4-5	NA	chr17:39305904-39306054	inner
LNCA_21_P0004539	0.033013	4.01021	lncRNA	Agilent_HUMAN_G3V2	TCONS_00010836	chr5	172894181	172894240	+	NA	NA	NA	Unknown
CUST_9162_PI429285431	0.0150866	4.00661	lncRNA	lncipedia2.1	>lnc-CNTRL-1:2	chr9	123607271	123608154	+	PSMD5	NA	chr9:123597271-123605206	inter
LNCA_21_P0005422	2.09676e-05	3.96786	lncRNA	Agilent_HUMAN_G3V2	TCONS_00013573	chr7	123561109	123561168	+	NA	NA	NA	Unknown
CUST_47975_PI429285431	0.027959	3.94126	lncRNA	ncbi	>gi|410172808|ref|XR_171995.1| PREDICTED: Homo sapiens uncharacterized LOC100996347 (LOC100996347), misc_RNA	NA	NA	NA	NA	NA	hg19_refFlat_C8orf44:range=chr8:67589944-675921895'pad=0,hg19_refFlat_C8orf44:range=chr8:67589944-675921895'pad=0 3'pad=0 strand=+ repeatMasking=none,-79.30;hg19_refFlat_RGS3:range=chr9:116222537-1163592335'pad=0,hg19_refFlat_RGS3:range=chr9:116222537-1163592335'pad=0 3'pad=0 strand=+ repeatMasking=none,-70.40;hg19_refFlat_PKP2:range=chr12:32945358-330496655'pad=0,hg19_refFlat_PKP2:range=chr12:32…	NA	Unknown
LNCA_21_P0005907	3.39237e-05	3.93179	lncRNA	Agilent_HUMAN_G3V2	TCONS_00015171	chr8	128234217	128234276	-	NA	NA	NA	Unknown
CUST_40250_PI429285431	0.0210415	3.90981	lncRNA	NONCODERv3	>n408171|NR_028294|lncRNA|Homosapiens||RefGeneNoncode|NR_028294||5.1821300|-0.1196354	chr1	71318035	71320114	-	PTGER3	NA	chr1:71318036-71513491	inner
CUST_36666_PI429285431	0.00541219	3.89823	lncRNA	NONCODERv3	>n345160|NULL|lincRNA|Homosapiens|HumanlincRNA|ScriptureReconstructionLincRNAsByLuo[unpublished]|linc_luo_709|NULL|-1.3084800|-0.3191685	chr12	32560112	32563111	+	NA	hg19_refFlat_OSTC:range=chr4:109571812-1095884135'pad=0,hg19_refFlat_OSTC:range=chr4:109571812-1095884135'pad=0 3'pad=0 strand=+ repeatMasking=none,-87.50;hg19_refFlat_NEK5:range=chr13:52639543-527016185'pad=0,hg19_refFlat_NEK5:range=chr13:52639543-527016185'pad=0 3'pad=0 strand=- repeatMasking=none,-72.00;hg19_refFlat_ZNF283:range=chr19:44337657-443527935'pad=0,hg19_refFlat_ZNF283:range=chr19:44…	NA	inter
CUST_16391_PI429285431	0.0206908	3.89716	lncRNA	lncipedia2.1	>lnc-PREX1-3:1	chr20	47104365	47107364	-	NA	NA	NA	inter
CUST_26560_PI429285431	0.0224413	3.8958	lncRNA	lncipedia2.1	>lnc-THBS1-1:1	chr15	39765592	39766321	+	NA	NA	NA	inter
CUST_48218_PI429285431	0.0436288	3.88191	lncRNA	UCSC	>hg19_lincRNAsTranscripts_TCONS_l2_00001430 range=chr1:106469905-106565836 5'pad=0 3'pad=0 strand=- repeatMasking=none	chr1	106469905	106471228	-	NA	NA	NA	inter
CUST_14447_PI429285431	0.0159355	3.87693	lncRNA	lncipedia2.1	>lnc-PLAGL2-1:1	chr20	30865107	30865565	-	KIF3B	NA	chr20:30865454-30875358	inter
CUST_26750_PI429285431	0.00466247	3.87085	lncRNA	NONCODERv3	>n323796|NULL|mRNAlikelncRNA|Homosapiens|vegalncRNA|GENCODE|OTTHUMT00000058638|http://vega.sanger.ac.uk/Homo_sapiens/Transcript/Summary?db=core;t=OTTHUMT00000058638|0.0626451|-0.3299117	chrX	145698993	145699428	+	NA	NA	NA	inter
LNCA_21_P0000998	0.0415843	3.86438	lncRNA	Agilent_HUMAN_G3V2	ENST00000414923	chr1	103967935	103967994	+	NA	NA	NA	Unknown
CUST_36667_PI429285431	0.00758326	3.86112	lncRNA	NONCODERv3	>n345160|NULL|lincRNA|Homosapiens|HumanlincRNA|ScriptureReconstructionLincRNAsByLuo[unpublished]|linc_luo_709|NULL|-1.3084800|-0.3191685	chr12	32563112	32563659	+	NA	hg19_refFlat_OSTC:range=chr4:109571812-1095884135'pad=0,hg19_refFlat_OSTC:range=chr4:109571812-1095884135'pad=0 3'pad=0 strand=+ repeatMasking=none,-87.50;hg19_refFlat_NEK5:range=chr13:52639543-527016185'pad=0,hg19_refFlat_NEK5:range=chr13:52639543-527016185'pad=0 3'pad=0 strand=- repeatMasking=none,-72.00;hg19_refFlat_ZNF283:range=chr19:44337657-443527935'pad=0,hg19_refFlat_ZNF283:range=chr19:44…	NA	inter
CUST_42398_PI429285431	0.0291754	3.85909	lncRNA	ensembl.GRCh37.72	>ENST00000517160 ncrna:snoRNA chromosome:GRCh37:1:12281205:12281328:-1 gene:ENSG00000252969 gene_biotype:snoRNA transcript_biotype:snoRNA	chr1	12281205	12281328	-	VPS13D	NA	chr1:12280784-12291328	inter
LNCA_21_P0005017	0.0303555	3.85605	lncRNA	Agilent_HUMAN_G3V2	TCONS_00012134	chr6	28756565	28756624	-	NA	NA	NA	Unknown
CUST_20941_PI429285431	0.00438848	3.82597	lncRNA	lncipedia2.1	>lnc-TRIM29-1:1	chr11	120136575	120138702	-	POU2F3	NA	chr11:120126575-120146641	inter
CUST_50553_PI429285431	0.00802285	3.81718	lncRNA	UCSC	>hg19_lincRNAsTranscripts_TCONS_l2_00030926 range=chrY:9154638-9159872 5'pad=0 3'pad=0 strand=- repeatMasking=none	chrY	9154638	9154957	-	NA	NA	NA	inter
CUST_18712_PI429285431	0.00102433	3.81716	lncRNA	lncipedia2.1	>lnc-PUS10-1:1	chr2	61108367	61108920	-	REL	NA	chr2:61098367-61118449	inter
LNCA_21_P0007195	0.022355	3.8064	lncRNA	Agilent_HUMAN_G3V2	TCONS_00019278	chr11	38708156	38708215	+	NA	NA	NA	Unknown
LNCA_21_P0002672	0.0063693	3.77268	lncRNA	Agilent_HUMAN_G3V2	TCONS_00005219	chr2	105413578	105469578	-	NA	NA	NA	Unknown
CUST_30665_PI429285431	0.00386361	3.76912	lncRNA	NONCODERv3	>n336109|X90753|mRNAlikelncRNA|Homosapiens|NULL|H-invitationalv7.5|HIT000324414|http://h-invitational.jp/hinv/spsoup/transcript_view?hit_id=HIT000324414|0.9822840|-0.1848652	chr19	55396828	55397065	+	FCAR	NA	chr19:55386828-55401839	inner
CUST_39098_PI429285431	0.0470796	3.74127	lncRNA	NONCODERv3	>n385650|NULL|lncRNA|Homosapiens||UCSCGeneNoncode|uc004azs.1||-0.9951180|-0.1884197	chr9	102121666	102122305	-	NA	NA	NA	inter
CUST_39647_PI429285431	0.0297948	3.73969	lncRNA	NONCODERv3	>n405223|NULL|lncRNA|Homosapiens||GENCODE|OTTHUMT00000322474||-1.0564800|-0.2352875	chr7	36366	37044	-	LOC100132858	NA	chr7:26366-36378	inter
CUST_2328_PI429285431	0.031982	3.73447	lncRNA	gencode_v17	>transcript_id "ENST00000513366.1" | genecode_v17	chr5	117911270	117911850	+	NA	hg19_refFlat_ISY1:range=chr3:128848924-1288798185'pad=0,hg19_refFlat_ISY1:range=chr3:128848924-1288798185'pad=0 3'pad=0 strand=- repeatMasking=none,-89.40;hg19_refFlat_BIRC5:range=chr17:76210398-762196355'pad=0,hg19_refFlat_BIRC5:range=chr17:76210398-762196355'pad=0 3'pad=0 strand=+ repeatMasking=none,-90.20;hg19_refFlat_JAM2:range=chr21:27012134-270866175'pad=0,hg19_refFlat_JAM2:range=chr21:2701…	NA	inter
CUST_36183_PI429285431	0.000127888	3.73399	lncRNA	NONCODERv3	>n344736|NULL|lincRNA|Homosapiens|HumanlincRNA|ScriptureReconstructionLincRNAsByLuo[unpublished]|linc_luo_285|NULL|-1.6131600|-0.3223694	chrX	45619650	45622649	-	NA	hg19_refFlat_C15orf40:range=chr15:83659385-836803595'pad=0,hg19_refFlat_C15orf40:range=chr15:83659385-836803595'pad=0 3'pad=0 strand=- repeatMasking=none,-82.90;hg19_refFlat_NXNL2:range=chr9:91150350-911861075'pad=0,hg19_refFlat_NXNL2:range=chr9:91150350-911861075'pad=0 3'pad=0 strand=+ repeatMasking=none,-86.90;hg19_refFlat_ZNF429:range=chr19:21688574-217208805'pad=0,hg19_refFlat_ZNF429:range=ch…	NA	inter
CUST_2024_PI429285431	0.0161047	3.7296	lncRNA	gencode_v17	>transcript_id "ENST00000514966.1" | genecode_v17	chr4	190114254	190114665	+	NA	hg19_refFlat_SEPP1:range=chr5:42800822-428108695'pad=0,hg19_refFlat_SEPP1:range=chr5:42800822-428108695'pad=0 3'pad=0 strand=- repeatMasking=none,-81.80;hg19_refFlat_YIF1B:range=chr19:38796129-388065575'pad=0,hg19_refFlat_YIF1B:range=chr19:38796129-388065575'pad=0 3'pad=0 strand=- repeatMasking=none,-82.70;hg19_refFlat_PKP2:range=chr12:32945358-330496655'pad=0,hg19_refFlat_PKP2:range=chr12:329453…	NA	inter
CUST_15953_PI429285431	0.0179865	3.72756	lncRNA	lncipedia2.1	>lnc-SHB-1:4	chr9	38072038	38073593	-	SHB	hg19_refFlat_ST6GAL2:range=chr2:107429598-1074604335'pad=0,hg19_refFlat_ST6GAL2:range=chr2:107429598-1074604335'pad=0 3'pad=0 strand=- repeatMasking=none,-77.80chr9:38062038-38069210	NA	inter
CUST_22715_PI429285431	0.0140352	3.70069	lncRNA	lncipedia2.1	>lnc-RP11-809H16.2.1-2:6	chr15	69383255	69383915	+	NA	NA	NA	inter
CUST_16357_PI429285431	0.0021099	3.69765	lncRNA	lncipedia2.1	>lnc-FANCI-2:7	chr15	89941259	89944258	+	NA	NA	NA	inter
CUST_4045_PI429285431	0.0421988	3.69114	lncRNA	gencode_v17	>transcript_id "ENST00000532849.1" | genecode_v17	chr11	87783274	87783845	+	NA	NA	NA	inter
CUST_14930_PI429285431	0.0383911	3.68681	lncRNA	lncipedia2.1	>lnc-CDH19-1:1	chr18	63921942	63922332	-	NA	NA	NA	inter
CUST_2987_PI429285431	0.0441982	3.66842	lncRNA	gencode_v17	>transcript_id "ENST00000524008.1" | genecode_v17	chr8	8413248	8413644	-	NA	NA	NA	inter
LNCA_21_P0009659	0.00321013	3.66778	lncRNA	Agilent_HUMAN_G3V2	TCONS_00026823	chr19	5559129	5559188	+	NA	NA	NA	Unknown
CUST_14252_PI429285431	0.00435014	3.66144	lncRNA	lncipedia2.1	>lnc-XCL1-2:1	chr1	168838215	168838624	+	NA	NA	NA	inter
CUST_36525_PI429285431	0.00713745	3.65788	lncRNA	NONCODERv3	>n345025|NULL|lincRNA|Homosapiens|HumanlincRNA|ScriptureReconstructionLincRNAsByLuo[unpublished]|linc_luo_574|NULL|-1.3165200|-0.3080929	chr8	125472839	125475102	-	RNF139	NA	chr8:125487008-125496268	inter
LNCA_21_P0009916	0.013124	3.65526	lncRNA	Agilent_HUMAN_G3V2	ENST00000458293	chr20	55306376	55306435	-	NA	NA	NA	Unknown
CUST_44810_PI429285431	0.0268784	3.65406	lncRNA	ncbi	>gi|255652939|ref|NR_028290.1| Homo sapiens vanin 3 (VNN3), transcript variant 3, non-coding RNA	Chr6	133043926	133045705	-	NA	NA	NA	inter
CUST_30114_PI429285431	0.00211139	3.65223	lncRNA	NONCODERv3	>n334672|AJ000095|mRNAlikelncRNA|Homosapiens|NULL|H-invitationalv7.5|HIT000243791|http://h-invitational.jp/hinv/spsoup/transcript_view?hit_id=HIT000243791|0.5602700|-0.3868437	chr21	37510116	37510396	+	CBR3	NA	chr21:37504692-37518860	inter
LNCA_21_P0010128	0.0152184	3.64473	lncRNA	Agilent_HUMAN_G3V2	TCONS_00028722	chr20	59044637	59044696	-	NA	NA	NA	Unknown
CUST_3358_PI429285431	0.0365057	3.6427	lncRNA	gencode_v17	>transcript_id "ENST00000443792.1" | genecode_v17	chr9	5584490	5585247	+	NA	hg19_refFlat_C14orf178:range=chr14:78235743-782360215'pad=0,hg19_refFlat_C14orf178:range=chr14:78235743-782360215'pad=0 3'pad=0 strand=+ repeatMasking=none,-74.70;hg19_refFlat_GDPD2:range=chrX:69644835-696529365'pad=0,hg19_refFlat_GDPD2:range=chrX:69644835-696529365'pad=0 3'pad=0 strand=+ repeatMasking=none,-70.40;hg19_refFlat_C15orf40:range=chr15:83659385-836803595'pad=0,hg19_refFlat_C15orf40:ra…	NA	inter
CUST_3923_PI429285431	0.0029458	3.63392	lncRNA	gencode_v17	>transcript_id "ENST00000527828.1" | genecode_v17	chr11	42014935	42015518	-	NA	NA	NA	inter
CUST_25728_PI429285431	0.0381646	3.63376	lncRNA	lncipedia2.1	>lnc-AC016251.1-1:11	chr15	96819146	96819586	-	NA	NA	NA	inter
LNCA_21_P0009704	0.043041	3.62578	lncRNA	Agilent_HUMAN_G3V2	TCONS_00026982	chr19	29939233	29939292	+	NA	NA	NA	Unknown
CUST_45284_PI429285431	7.22817e-06	3.61316	lncRNA	ncbi	>gi|386268033|ref|NR_047684.1| Homo sapiens transmembrane protein 249 (TMEM249), transcript variant 3, non-coding RNA	NW_003315924.1	122485	123463	-	NA	NA	NA	Unknown
CUST_1689_PI429285431	0.0205064	3.603	lncRNA	gencode_v17	>transcript_id "ENST00000510095.1" | genecode_v17	chr4	11627338	11627892	+	NA	NA	NA	inter
CUST_10282_PI429285431	0.0256761	3.60284	lncRNA	lncipedia2.1	>lnc-ATF3-1:2	chr1	212734097	212735964	+	ATF3	NA	chr1:212738697-212744165	inter
CUST_27924_PI429285431	0.0239457	3.60248	lncRNA	NONCODERv3	>n325168|NULL|mRNAlikelncRNA|Homosapiens|vegalncRNA|GENCODE|OTTHUMT00000109027|http://vega.sanger.ac.uk/Homo_sapiens/Transcript/Summary?db=core;t=OTTHUMT00000109027|-0.6081010|-0.3177814	chr2	114051428	114052520	+	NA	NA	NA	inter
CUST_38141_PI429285431	0.0497462	3.6001	lncRNA	NONCODERv3	>n381322|NULL|lncRNA|Homosapiens||UCSCGeneNoncode|uc001gyh.2||4.3959300|-0.2416214	chr1	202789393	202792188	+	NA	hg19_refFlat_SRP9:range=chr1:225965643-2259746715'pad=0,hg19_refFlat_SRP9:range=chr1:225965643-2259746715'pad=0 3'pad=0 strand=+ repeatMasking=none,-82.50;hg19_refFlat_IFT81:range=chr12:110565186-1106057835'pad=0,hg19_refFlat_IFT81:range=chr12:110565186-1106057835'pad=0 3'pad=0 strand=+ repeatMasking=none,-77.80;hg19_refFlat_HIF3A:range=chr19:46807190-468415635'pad=0,hg19_refFlat_HIF3A:range=chr1…	NA	inter
CUST_44809_PI429285431	0.0252499	3.59747	lncRNA	ncbi	>gi|255652940|ref|NR_028291.1| Homo sapiens vanin 3 (VNN3), transcript variant 1, non-coding RNA	Chr6	133043926	133045659	-	NA	NA	NA	inter
LNCA_21_P0010336	0.0254815	3.58661	lncRNA	Agilent_HUMAN_G3V2	ENST00000424852	chr22	42760829	42760888	-	NA	NA	NA	Unknown
LNCA_21_P0006512	0.00376131	3.58601	lncRNA	Agilent_HUMAN_G3V2	TCONS_00017234	chrX	118707059	118707118	+	NA	NA	NA	Unknown
CUST_17829_PI429285431	0.0439249	3.58589	lncRNA	lncipedia2.1	>lnc-DLGAP1-1:1	chr18	3480401	3480625	-	NA	NA	NA	inter
CUST_43693_PI429285431	0.0405795	3.58344	lncRNA	ncbi	>gi|338827641|ref|NR_040064.1| Homo sapiens chromosome 1 open reading frame 98 (C1orf98), non-coding RNA	Chr1	200311672	200313116	-	NA	NA	NA	inter
CUST_34217_PI429285431	0.0410546	3.57367	lncRNA	NONCODERv3	>n341078|BC039514|mRNAlikelncRNA|Homosapiens|HumanlncRNA|JounralRNA|3544|NULL|-0.1862850|-0.3360772	chr11	78135027	78136680	-	NARS2	NA	chr11:78147016-78150882	inter
LNCA_21_P0008097	0.00214616	3.57301	lncRNA	Agilent_HUMAN_G3V2	TCONS_00021863	chr13	83229743	83229802	+	NA	NA	NA	Unknown
CUST_8781_PI429285431	0.0370842	3.56104	lncRNA	lncipedia2.1	>lnc-NKPD1-1:1	chr19	45639307	45642306	-	LRRC68	hg19_refFlat_FAM76A:range=chr1:28052592-280870925'pad=0,hg19_refFlat_FAM76A:range=chr1:28052592-280870925'pad=0 3'pad=0 strand=+ repeatMasking=none,-50.20;hg19_refFlat_ZNF195:range=chr11:3380348-34002705'pad=0,hg19_refFlat_ZNF195:range=chr11:3380348-34002705'pad=0 3'pad=0 strand=- repeatMasking=none,-81.90;hg19_refFlat_BTG3:range=chr21:18966411-189814625'pad=0,hg19_refFlat_BTG3:range=chr21:189664…	NA	inner
CUST_27514_PI429285431	0.0364389	3.54049	lncRNA	NONCODERv3	>n324692|NULL|mRNAlikelncRNA|Homosapiens|vegalncRNA|GENCODE|OTTHUMT00000320635|http://vega.sanger.ac.uk/Homo_sapiens/Transcript/Summary?db=core;t=OTTHUMT00000320635|-1.0960300|-0.2379157	chr22	25949257	25949808	-	NA	NA	NA	inter
CUST_12466_PI429285431	0.00309066	3.53005	lncRNA	lncipedia2.1	>lnc-ATOH8-2:2	chr2	86141404	86142840	+	NA	NA	NA	inter
CUST_15920_PI429285431	0.00608334	3.5274	lncRNA	lncipedia2.1	>lnc-C7orf11-7:2	chr7	39605742	39606151	-	C7orf36	NA	chr7:39606003-39612480	inter
CUST_4215_PI429285431	0.0383848	3.52735	lncRNA	gencode_v17	>transcript_id "ENST00000551202.1" | genecode_v17	chr12	30383718	30384226	-	NA	NA	NA	inter
CUST_42060_PI429285431	0.00208914	3.52504	lncRNA	ensembl.GRCh37.72	>ENST00000384891 ncrna:miRNA chromosome:GRCh37:1:209605478:209605587:1 gene:ENSG00000207623 gene_biotype:miRNA transcript_biotype:miRNA	chr1	209605478	209605587	+	LOC642587	NA	chr1:209602168-209605894	inter
CUST_28020_PI429285431	0.00416103	3.51957	lncRNA	NONCODERv3	>n325276|NULL|mRNAlikelncRNA|Homosapiens|vegalncRNA|GENCODE|OTTHUMT00000328221|http://vega.sanger.ac.uk/Homo_sapiens/Transcript/Summary?db=core;t=OTTHUMT00000328221|-1.1528600|-0.3060043	chr2	66777760	66778524	-	MEIS1	hg19_refFlat_MYL10:range=chr7:101256755-1012723985'pad=0,hg19_refFlat_MYL10:range=chr7:101256755-1012723985'pad=0 3'pad=0 strand=- repeatMasking=none,-74.50;hg19_refFlat_C14orf178:range=chr14:78227386-782360215'pad=0,hg19_refFlat_C14orf178:range=chr14:78227386-782360215'pad=0 3'pad=0 strand=+ repeatMasking=none,-79.40;hg19_refFlat_NUDT7:range=chr16:77756480-777755495'pad=0,hg19_refFlat_NUDT7:rang…	NA	inner
LNCA_21_P0005044	0.0197798	3.51785	lncRNA	Agilent_HUMAN_G3V2	TCONS_00012231	chr6	96461454	96461513	-	NA	NA	NA	Unknown
LNCA_33_P3223632	0.0116749	3.50382	lncRNA	Agilent_HUMAN_G3V2	XR_133099	chr16	32167852	32167911	-	NA	NA	NA	Unknown
CUST_49655_PI429285431	0.0349241	3.50208	lncRNA	UCSC	>hg19_lincRNAsTranscripts_TCONS_l2_00026731 range=chr7:84277854-84509818 5'pad=0 3'pad=0 strand=- repeatMasking=none	chr7	84277854	84278272	-	NA	NA	NA	inter
CUST_24175_PI429285431	0.0473591	3.49468	lncRNA	lncipedia2.1	>lnc-AC012123.1.1-1:1	chr18	30420341	30420809	+	NA	NA	NA	inter
CUST_48114_PI429285431	0.0023486	3.49428	lncRNA	ncbi	>gi|397138532|ref|XR_159522.1| PREDICTED: Homo sapiens uncharacterized LOC100653206, transcript variant 2 (LOC100653206), misc_RNA	NA	NA	NA	NA	NA	NA	NA	Unknown
CUST_2467_PI429285431	0.00605207	3.48017	lncRNA	gencode_v17	>transcript_id "ENST00000443445.1" | genecode_v17	chr6	3594481	3595269	-	NA	NA	NA	inter
CUST_26283_PI429285431	0.0404371	3.47593	lncRNA	lncipedia2.1	>lnc-GSG1L-1:3	chr16	27729564	27730113	-	KIAA0556	hg19_refFlat_KIAA0556:range=chr16:27561492-277899505'pad=0,hg19_refFlat_KIAA0556:range=chr16:27561492-277899505'pad=0 3'pad=0 strand=+ repeatMasking=none,-99.10chr16:27719564-27739615	NA	inner
CUST_17691_PI429285431	0.0328206	3.47225	lncRNA	lncipedia2.1	>lnc-FAM9A-1:1	chrX	8835543	8835820	-	NA	NA	NA	inter
CUST_36047_PI429285431	0.0089387	3.47101	lncRNA	NONCODERv3	>n344644|NULL|lincRNA|Homosapiens|HumanlincRNA|ScriptureReconstructionLincRNAsByLuo[unpublished]|linc_luo_192|NULL|-1.3349100|-0.2234839	chr5	173090842	173093841	-	NA	NA	NA	inter
LNCA_21_P0008172	0.0248604	3.46888	lncRNA	Agilent_HUMAN_G3V2	TCONS_00022035	chr13	61190525	61190584	-	NA	NA	NA	Unknown
CUST_25507_PI429285431	0.0443626	3.46632	lncRNA	lncipedia2.1	>lnc-SPATA12-1:2	chr3	56974919	56975254	+	ARHGEF3	NA	chr3:56964919-56985076	inner
CUST_51332_PI429285431	0.0368695	3.46048	lncRNA	UCSC	>hg19_lincRNAsTranscripts_TCONS_l2_00009132 range=chr15:62488170-62489733 5'pad=0 3'pad=0 strand=- repeatMasking=none	chr15	62488170	62489567	-	NA	hg19_refFlat_CSF2RA:range=chrX:1401597-14283725'pad=0,hg19_refFlat_CSF2RA:range=chrX:1401597-14283725'pad=0 3'pad=0 strand=+ repeatMasking=none,-83.10;hg19_refFlat_SGCE:range=chr7:94214811-942854105'pad=0,hg19_refFlat_SGCE:range=chr7:94214811-942854105'pad=0 3'pad=0 strand=- repeatMasking=none,-77.10;hg19_refFlat_HSD11B1L:range=chr19:5684044-56879565'pad=0,hg19_refFlat_HSD11B1L:range=chr19:568404…	NA	inter
CUST_40375_PI429285431	0.0125579	3.45617	lncRNA	NONCODERv3	>n409156|NR_033296|lncRNA|Homosapiens||RefGeneNoncode|NR_033296||0.8129150|-0.2086618	chr1	45959597	45961637	-	TESK2	hg19_refFlat_CAGE1:range=chr6:7329398-73874065'pad=0,hg19_refFlat_CAGE1:range=chr6:7329398-73874065'pad=0 3'pad=0 strand=- repeatMasking=none,-80.60;hg19_refFlat_C8orf44:range=chr8:67589944-675921895'pad=0,hg19_refFlat_C8orf44:range=chr8:67589944-675921895'pad=0 3'pad=0 strand=+ repeatMasking=none,-74.10;hg19_refFlat_ISY1:range=chr3:128848924-1288798185'pad=0,hg19_refFlat_ISY1:range=chr3:12884892…	NA	inter
CUST_31086_PI429285431	0.00284042	3.44639	lncRNA	NONCODERv3	>n337365|DQ645738|mRNAlikelncRNA|Homosapiens|NULL|H-invitationalv7.5|HIT000392999|http://h-invitational.jp/hinv/spsoup/transcript_view?hit_id=HIT000392999|-1.2526200|-0.2499688	chr21	41014312	41014561	+	B3GALT5	NA	chr21:41029254-41034815	inner
LNCA_21_P0010120	0.0138149	3.43475	lncRNA	Agilent_HUMAN_G3V2	TCONS_00028695	chr20	47656980	47657039	-	NA	NA	NA	Unknown
LNCA_21_P0002059	0.00362994	3.42955	lncRNA	Agilent_HUMAN_G3V2	ENST00000420724	chr2	65828996	65829055	-	NA	NA	NA	Unknown
CUST_41943_PI429285431	0.0196756	3.42853	lncRNA	ensembl.GRCh37.72	>ENST00000384868 ncrna:miRNA chromosome:GRCh37:8:10892716:10892812:-1 gene:ENSG00000207600 gene_biotype:miRNA transcript_biotype:miRNA	chr8	10892716	10892812	-	XKR6	NA	chr8:10882716-10902812	inner
CUST_34364_PI429285431	0.0269248	3.42229	lncRNA	NONCODERv3	>n341232|BC033981|mRNAlikelncRNA|Homosapiens|HumanlncRNA|JounralRNA|3700|NULL|3.5215600|-0.3029901	chr7	41141201	41142438	+	NA	NA	NA	inter
CUST_2865_PI429285431	0.0437066	3.41038	lncRNA	gencode_v17	>transcript_id "ENST00000444745.1" | genecode_v17	chr7	67485240	67485749	+	NA	NA	NA	inter
CUST_27941_PI429285431	0.0227032	3.39664	lncRNA	NONCODERv3	>n325185|NULL|mRNAlikelncRNA|Homosapiens|vegalncRNA|GENCODE|OTTHUMT00000330679|http://vega.sanger.ac.uk/Homo_sapiens/Transcript/Summary?db=core;t=OTTHUMT00000330679|-1.0268800|-0.3320542	chr2	107737032	107737608	+	NA	NA	NA	inter
LNCA_21_P0009248	0.01121	3.37782	lncRNA	Agilent_HUMAN_G3V2	TCONS_00025394	chr17	41393769	41393828	+	NA	NA	NA	Unknown
CUST_25755_PI429285431	0.0277722	3.37376	lncRNA	lncipedia2.1	>lnc-PLK1-2:1	chr16	23723704	23724237	+	ERN2	NA	chr16:23713704-23724821	inner
LNCA_21_P0004161	0.0389268	3.372	lncRNA	Agilent_HUMAN_G3V2	ENST00000511592	chr5	99989892	99989951	-	NA	NA	NA	Unknown
LNCA_21_P0005712	0.0362512	3.36056	lncRNA	Agilent_HUMAN_G3V2	TCONS_00014741	chr8	65929976	65930035	+	NA	NA	NA	Unknown
CUST_40063_PI429285431	0.0499233	3.36015	lncRNA	NONCODERv3	>n407279|NR_026751_3|lncRNA|Homosapiens||RefGeneNoncode|NR_026751_3||-0.9137540|-0.2599620	chr6	1262133	1264562	-	FOXQ1	hg19_refFlat_ZNF714:range=chr19:21281075-213011355'pad=0,hg19_refFlat_ZNF714:range=chr19:21281075-213011355'pad=0 3'pad=0 strand=+ repeatMasking=none,-65.20;hg19_refFlat_PKP2:range=chr12:32945358-330496655'pad=0,hg19_refFlat_PKP2:range=chr12:32945358-330496655'pad=0 3'pad=0 strand=- repeatMasking=none,-81.30chr6:1312675-1314993	NA	inner
CUST_17672_PI429285431	0.0257301	3.35447	lncRNA	lncipedia2.1	>lnc-MPDZ-2:2	chr9	12139007	12139391	-	NA	NA	NA	inter
LNCA_21_P0013379	0.0414977	3.34721	lncRNA	Agilent_HUMAN_G3V2	ENST00000423781	chr7	47066958	47067017	+	NA	NA	NA	Unknown
CUST_31237_PI429285431	0.0367088	3.33847	lncRNA	NONCODERv3	>n337686|AJ227904|mRNAlikelncRNA|Homosapiens|HumanlncRNA|JounralRNA|68|NULL|-1.0687800|-0.3346560	chr15	33397958	33398440	-	NA	NA	NA	inter
CUST_46263_PI429285431	0.00753043	3.3367	lncRNA	ncbi	>gi|389565505|ref|NR_047026.1| Homo sapiens long intergenic non-protein coding RNA 443 (LINC00443), non-coding RNA	Chr13	107306228	107307463	+	NA	NA	NA	inter
CUST_17655_PI429285431	0.00530743	3.32769	lncRNA	lncipedia2.1	>lnc-RP11-168K9.2.1-1:1	chr11	126925991	126926664	+	NA	NA	NA	inter
LNCA_21_P0006364	0.0183634	3.32163	lncRNA	Agilent_HUMAN_G3V2	TCONS_00016666	chr9	110273665	110276965	+	NA	NA	NA	Unknown
CUST_5494_PI429285431	0.0154199	3.32142	lncRNA	gencode_v17	>transcript_id "ENST00000565347.1" | genecode_v17	chr16	32661463	32662002	+	TP53TG3	NA	chr16:32684849-32685277	inter
CUST_34741_PI429285431	0.0341342	3.32014	lncRNA	NONCODERv3	>n341647|BC041456|mRNAlikelncRNA|Homosapiens|HumanlncRNA|JounralRNA|4118|NULL|-0.8771180|-0.2412463	chr9	3181588	3183146	+	NA	NA	NA	inter
LNCA_21_P0002645	0.0430832	3.31261	lncRNA	Agilent_HUMAN_G3V2	ENST00000431336	chr2	6790355	6790414	-	NA	NA	NA	Unknown
LNCA_21_P0005136	0.0406311	3.30556	lncRNA	Agilent_HUMAN_G3V2	THC2784169	chr6	138146634	138146693	+	NA	NA	NA	Unknown
CUST_22369_PI429285431	0.04013	3.29738	lncRNA	lncipedia2.1	>lnc-WDR16-4:1	chr17	9373076	9373790	+	STX8	NA	chr17:9363076-9383331	inner
LNCA_21_P0009343	0.0218751	3.29409	lncRNA	Agilent_HUMAN_G3V2	XR_132630	chr17	59470827	59470886	-	NA	NA	NA	Unknown
LNCA_21_P0009318	0.0411645	3.28906	lncRNA	Agilent_HUMAN_G3V2	TCONS_00025619	chr17	36443046	36451500	-	NA	NA	NA	Unknown
LNCA_21_P0003293	0.00286178	3.28193	lncRNA	Agilent_HUMAN_G3V2	TCONS_00007229	chr3	108462162	108462221	-	NA	NA	NA	Unknown
CUST_7725_PI429285431	0.0208367	3.27936	lncRNA	lncipedia2.1	>lnc-ENPP1-1:2	chr6	132228546	132229146	+	NA	NA	NA	inter
CUST_29273_PI429285431	0.0202919	3.27183	lncRNA	NONCODERv3	>n332382|AM998489|mRNAlikelncRNA|Homosapiens|NULL|H-invitationalv7.5|HIT000500270|http://h-invitational.jp/hinv/spsoup/transcript_view?hit_id=HIT000500270|1.0945100|-0.1971778	chr18	45567279	45567821	-	ZBTB7C	NA	chr18:45557279-45663680	inner
LNCA_21_P0011031	0.0448378	3.27008	lncRNA	Agilent_HUMAN_G3V2	ENST00000513207	chr11	78135773	78135832	-	NA	NA	NA	Unknown
CUST_563_PI429285431	0.0145262	3.26325	lncRNA	gencode_v17	>transcript_id "ENST00000439570.1" | genecode_v17	chr1	212640158	212640516	-	NA	NA	NA	inter
CUST_43824_PI429285431	0.0385535	3.25692	lncRNA	ncbi	>gi|255918245|ref|NR_028308.1| Homo sapiens BRE antisense RNA 1 (BRE-AS1), non-coding RNA	Chr2	28112323	28113989	-	NA	NA	NA	inter
CUST_23332_PI429285431	0.0147042	3.24735	lncRNA	lncipedia2.1	>lnc-KDM5A-3:1	chr12	695414	695786	-	NINJ2	NA	chr12:685414-705652	inner
CUST_35815_PI429285431	0.0406627	3.24673	lncRNA	NONCODERv3	>n344491|NULL|lincRNA|Homosapiens|HumanlincRNA|ScriptureReconstructionLincRNAsByLuo[unpublished]|linc_luo_39|NULL|-1.2920200|-0.2704263	chr5	147328350	147329332	+	NA	hg19_refFlat_FBLIM1:range=chr1:16091479-161015265'pad=0,hg19_refFlat_FBLIM1:range=chr1:16091479-161015265'pad=0 3'pad=0 strand=+ repeatMasking=none,-82.20;hg19_refFlat_ZNF429:range=chr19:21688574-217208805'pad=0,hg19_refFlat_ZNF429:range=chr19:21688574-217208805'pad=0 3'pad=0 strand=+ repeatMasking=none,-76.00	NA	inter
LNCA_19_P00317910	0.000388342	3.2441	lncRNA	Agilent_HUMAN_G3V2	ENST00000427109	chr9	132094633	132094692	+	NA	NA	NA	Unknown
CUST_46914_PI429285431	0.0450588	3.23987	lncRNA	ncbi	>gi|241896901|ref|NR_027751.1| Homo sapiens family with sequence similarity 20, member A (FAM20A), transcript variant 2, non-coding RNA	Chr17	66531257	66534256	-	NA	NA	NA	inter
CUST_753_PI429285431	0.0394287	3.23934	lncRNA	gencode_v17	>transcript_id "ENST00000454489.1" | genecode_v17	chr2	11528149	11528774	-	NA	NA	NA	inter
CUST_4797_PI429285431	0.00123619	3.23917	lncRNA	gencode_v17	>transcript_id "ENST00000554810.1" | genecode_v17	chr14	46175461	46176047	-	NA	NA	NA	inter
CUST_34764_PI429285431	0.0293191	3.23603	lncRNA	NONCODERv3	>n341673|BC040892|mRNAlikelncRNA|Homosapiens|HumanlncRNA|JounralRNA|4144|NULL|-0.9626090|-0.4225260	chr9	31371608	31372393	-	NA	NA	NA	inter
LNCA_21_P0003679	0.0456583	3.23508	lncRNA	Agilent_HUMAN_G3V2	TCONS_00008336	chr4	175101513	175101572	+	NA	NA	NA	Unknown
CUST_50073_PI429285431	0.0339076	3.2225	lncRNA	UCSC	>hg19_lincRNAsTranscripts_TCONS_l2_00028240 range=chr8:74189427-74190657 5'pad=0 3'pad=0 strand=- repeatMasking=none	chr8	74189427	74190295	-	RPL7	NA	chr8:74189597-74200657	inter
LNCA_21_P0007722	0.00805528	3.21936	lncRNA	Agilent_HUMAN_G3V2	TCONS_00020826	chr12	68099583	68099642	-	NA	NA	NA	Unknown
CUST_35964_PI429285431	0.0267996	3.21177	lncRNA	NONCODERv3	>n344589|NULL|lincRNA|Homosapiens|HumanlincRNA|ScriptureReconstructionLincRNAsByLuo[unpublished]|linc_luo_137|NULL|-1.3735600|-0.2460965	chr1	9211455	9212453	-	NA	hg19_refFlat_OSTC:range=chr4:109571812-1095884135'pad=0,hg19_refFlat_OSTC:range=chr4:109571812-1095884135'pad=0 3'pad=0 strand=+ repeatMasking=none,-80.00;hg19_refFlat_ISY1:range=chr3:128848924-1288798185'pad=0,hg19_refFlat_ISY1:range=chr3:128848924-1288798185'pad=0 3'pad=0 strand=- repeatMasking=none,-75.80;hg19_refFlat_C8orf44:range=chr8:67589944-675921895'pad=0,hg19_refFlat_C8orf44:range=chr8:…	NA	inter
CUST_26023_PI429285431	0.00562846	3.20635	lncRNA	lncipedia2.1	>lnc-FMN1-3:1	chr15	32965191	32965651	-	SCG5	NA	chr15:32955191-32975266	inner
CUST_12238_PI429285431	0.0406688	3.19625	lncRNA	lncipedia2.1	>lnc-TMEM132C-5:1	chr12	127836503	127836923	+	NA	NA	NA	inter
CUST_26947_PI429285431	0.00102456	3.19278	lncRNA	NONCODERv3	>n324028|NULL|mRNAlikelncRNA|Homosapiens|vegalncRNA|GENCODE|OTTHUMT00000053047|http://vega.sanger.ac.uk/Homo_sapiens/Transcript/Summary?db=core;t=OTTHUMT00000053047|-1.0735400|-0.5731111	chr9	93952483	93952693	-	NA	NA	NA	inter
LNCA_21_P0008925	0.00481621	3.1927	lncRNA	Agilent_HUMAN_G3V2	TCONS_00024377	chr16	34685495	34686217	+	NA	NA	NA	Unknown
LNCA_21_P0004270	0.0227362	3.17894	lncRNA	Agilent_HUMAN_G3V2	TCONS_00010006	chr5	81190769	81190828	+	NA	NA	NA	Unknown
CUST_7646_PI429285431	0.0350181	3.17315	lncRNA	lncipedia2.1	>lnc-RTN2-1:1	chr19	45978387	45980367	-	FOSB	NA	chr19:45971253-45978437	inner
CUST_29651_PI429285431	0.0426808	3.17223	lncRNA	NONCODERv3	>n333260|AF540977|mRNAlikelncRNA|Homosapiens|NULL|H-invitationalv7.5|HIT000081465_04|http://h-invitational.jp/hinv/spsoup/transcript_view?hit_id=HIT000081465_04|1.2414400|-0.1440541	chr8	7679536	7679763	-	DEFB106A	NA	chr8:7682694-7686575	inner
CUST_17140_PI429285431	0.0230484	3.17018	lncRNA	lncipedia2.1	>lnc-JUN-6:3	chr1	59761542	59761973	-	FGGY	NA	chr1:59762625-59771578	inter
CUST_50627_PI429285431	0.00327297	3.16655	lncRNA	UCSC	>hg19_lincRNAsTranscripts_TCONS_l2_00002904 range=chr10:19425689-19444121 5'pad=0 3'pad=0 strand=+ repeatMasking=none	chr10	19425689	19425975	+	LOC100652979	NA	chr10:19415689-19454121	inter
CUST_22990_PI429285431	0.0230328	3.15114	lncRNA	lncipedia2.1	>lnc-RFPL4B-1:1	chr6	112627531	112628066	+	NA	NA	NA	inter
CUST_11265_PI429285431	0.0407489	3.14024	lncRNA	lncipedia2.1	>lnc-THAP6-2:3	chr4	76283191	76283612	+	NA	NA	NA	inter
CUST_31003_PI429285431	0.0133592	3.13798	lncRNA	NONCODERv3	>n337166|AJ244500|mRNAlikelncRNA|Homosapiens|NULL|H-invitationalv7.5|HIT000384069|http://h-invitational.jp/hinv/spsoup/transcript_view?hit_id=HIT000384069|-0.9854720|-0.2372664	chr1	82418510	82418857	+	LPHN2	NA	chr1:82408510-82428858	inner
CUST_49942_PI429285431	0.0435818	3.13197	lncRNA	UCSC	>hg19_lincRNAsTranscripts_TCONS_l2_00026181 range=chr7:125077908-125121652 5'pad=0 3'pad=0 strand=+ repeatMasking=none	chr7	125077908	125079201	+	NA	hg19_refFlat_STAP2:range=chr19:4324130-43387505'pad=0,hg19_refFlat_STAP2:range=chr19:4324130-43387505'pad=0 3'pad=0 strand=- repeatMasking=none,-75.20;hg19_refFlat_BRD2:range=chr6_cox_hap2:4385214-43930395'pad=0,hg19_refFlat_BRD2:range=chr6_cox_hap2:4385214-43930395'pad=0 3'pad=0 strand=+ repeatMasking=none,-83.40;hg19_refFlat_BRD2:range=chr6_ssto_hap7:4421448-44292735'pad=0,hg19_refFlat_BRD2:ran…	NA	inter
CUST_1393_PI429285431	0.0446662	3.13145	lncRNA	gencode_v17	>transcript_id "ENST00000478239.1" | genecode_v17	chr3	81295730	81296290	-	NA	hg19_refFlat_NLRP12:range=chr19:54297303-543089395'pad=0,hg19_refFlat_NLRP12:range=chr19:54297303-543089395'pad=0 3'pad=0 strand=- repeatMasking=none,-72.70	NA	inter
CUST_5098_PI429285431	0.0348279	3.12862	lncRNA	gencode_v17	>transcript_id "ENST00000566245.1" | genecode_v17	chr15	24407901	24408531	-	NA	NA	NA	inter
CUST_27665_PI429285431	0.00867967	3.12762	lncRNA	NONCODERv3	>n324872|NULL|mRNAlikelncRNA|Homosapiens|vegalncRNA|GENCODE|OTTHUMT00000171043|http://vega.sanger.ac.uk/Homo_sapiens/Transcript/Summary?db=core;t=OTTHUMT00000171043|-0.2627430|-0.2790419	chr21	22303347	22304243	-	NCAM2	hg19_refFlat_FAM115C:range=chr7:143412963-1434247605'pad=0,hg19_refFlat_FAM115C:range=chr7:143412963-1434247605'pad=0 3'pad=0 strand=+ repeatMasking=none,-57.90;hg19_refFlat_ZNF701:range=chr19:53075495-530867105'pad=0,hg19_refFlat_ZNF701:range=chr19:53075495-530867105'pad=0 3'pad=0 strand=+ repeatMasking=none,-85.70;hg19_refFlat_CNGA1:range=chr4:47938438-479731175'pad=0,hg19_refFlat_CNGA1:range=c…	NA	inner
CUST_10030_PI429285431	0.0238776	3.12504	lncRNA	lncipedia2.1	>lnc-C15orf54-2:2	chr15	39680836	39681077	+	NA	NA	NA	inter
LNCA_21_P0010178	0.0263787	3.12365	lncRNA	Agilent_HUMAN_G3V2	ENST00000416641	chr21	19032581	19032640	-	NA	NA	NA	Unknown
CUST_39876_PI429285431	4.8812e-05	3.12003	lncRNA	NONCODERv3	>n406542|NR_024052_5|lncRNA|Homosapiens||RefGeneNoncode|NR_024052_5||1.5958200|-0.1895631	chr6	1603264	1606263	-	GMDS	hg19_refFlat_ADRA1A:range=chr8:26606107-267224865'pad=0,hg19_refFlat_ADRA1A:range=chr8:26606107-267224865'pad=0 3'pad=0 strand=- repeatMasking=none,-85.80;hg19_refFlat_BRD2:range=chr6_dbb_hap3:4226965-42298365'pad=0,hg19_refFlat_BRD2:range=chr6_dbb_hap3:4226965-42298365'pad=0 3'pad=0 strand=+ repeatMasking=none,-56.50;hg19_refFlat_GDPD2:range=chrX:69644835-696529365'pad=0,hg19_refFlat_GDPD2:range…	NA	inner
CUST_648_PI429285431	0.0329736	3.1187	lncRNA	gencode_v17	>transcript_id "ENST00000431542.1" | genecode_v17	chr2	741977	742232	+	NA	NA	NA	inter
CUST_36271_PI429285431	0.0243533	3.11764	lncRNA	NONCODERv3	>n344802|NULL|lincRNA|Homosapiens|HumanlincRNA|ScriptureReconstructionLincRNAsByLuo[unpublished]|linc_luo_351|NULL|-1.3826700|-0.3329522	chr1	95143530	95144358	+	NA	hg19_refFlat_PODXL:range=chr7:131189070-1312411185'pad=0,hg19_refFlat_PODXL:range=chr7:131189070-1312411185'pad=0 3'pad=0 strand=- repeatMasking=none,-88.00;hg19_refFlat_ASCC1:range=chr10:73862127-739730565'pad=0,hg19_refFlat_ASCC1:range=chr10:73862127-739730565'pad=0 3'pad=0 strand=- repeatMasking=none,-81.40;hg19_refFlat_BRD2:range=chr6_qbl_hap6:4172820-41806325'pad=0,hg19_refFlat_BRD2:range=ch…	NA	inter
CUST_6763_PI429285431	0.00349813	3.11759	lncRNA	gencode_v17	>transcript_id "ENST00000433588.1" | genecode_v17	chr21	16866251	16867626	-	NA	NA	NA	inter
CUST_6489_PI429285431	0.0366206	3.11515	lncRNA	gencode_v17	>transcript_id "ENST00000412740.2" | genecode_v17	chr19	36806262	36806976	-	ZFP14	hg19_refFlat_PKP2:range=chr12:32945358-330496655'pad=0,hg19_refFlat_PKP2:range=chr12:32945358-330496655'pad=0 3'pad=0 strand=- repeatMasking=none,-81.00;hg19_refFlat_C8orf44:range=chr8:67589944-675921895'pad=0,hg19_refFlat_C8orf44:range=chr8:67589944-675921895'pad=0 3'pad=0 strand=+ repeatMasking=none,-74.80;hg19_refFlat_CAGE1:range=chr6:7329398-73874065'pad=0,hg19_refFlat_CAGE1:range=chr6:732939…	NA	inter
CUST_21974_PI429285431	0.0025932	3.10619	lncRNA	lncipedia2.1	>lnc-POU3F2-1:1	chr6	99006310	99006447	+	NA	NA	NA	inter
LNCA_21_P0007262	0.0460699	3.10326	lncRNA	Agilent_HUMAN_G3V2	TCONS_00019441	chr11	92985147	92985206	+	NA	NA	NA	Unknown
CUST_36350_PI429285431	0.019115	3.10302	lncRNA	NONCODERv3	>n344873|NULL|lincRNA|Homosapiens|HumanlincRNA|ScriptureReconstructionLincRNAsByLuo[unpublished]|linc_luo_422|NULL|-1.5197100|-0.2620507	chr6	44446536	44448533	-	NA	NA	NA	inter
CUST_26952_PI429285431	0.0174681	3.09747	lncRNA	NONCODERv3	>n324033|NULL|mRNAlikelncRNA|Homosapiens|vegalncRNA|GENCODE|OTTHUMT00000053051|http://vega.sanger.ac.uk/Homo_sapiens/Transcript/Summary?db=core;t=OTTHUMT00000053051|0.0434181|-0.3630431	chr9	93943569	93945568	+	NA	hg19_refFlat_ZNF829:range=chr19:37382394-374068565'pad=0,hg19_refFlat_ZNF829:range=chr19:37382394-374068565'pad=0 3'pad=0 strand=- repeatMasking=none,-65.80;hg19_refFlat_C8orf44:range=chr8:67589944-675921895'pad=0,hg19_refFlat_C8orf44:range=chr8:67589944-675921895'pad=0 3'pad=0 strand=+ repeatMasking=none,-77.10;hg19_refFlat_PKP2:range=chr12:32945358-330496655'pad=0,hg19_refFlat_PKP2:range=chr12:…	NA	inter
LNCA_21_P0009677	0.000548932	3.08964	lncRNA	Agilent_HUMAN_G3V2	TCONS_00026870	chr19	4585778	4585837	+	NA	NA	NA	Unknown
LNCA_21_P0005439	0.0350041	3.08712	lncRNA	Agilent_HUMAN_G3V2	TCONS_00013617	chr7	144088043	144088102	+	NA	NA	NA	Unknown
CUST_4499_PI429285431	0.0447452	3.08444	lncRNA	gencode_v17	>transcript_id "ENST00000540490.1" | genecode_v17	chr12	128118641	128119488	-	NA	NA	NA	inter
CUST_13176_PI429285431	0.0154369	3.08003	lncRNA	lncipedia2.1	>lnc-KCNG2-1:2	chr18	77616379	77617297	+	KCNG2	NA	chr18:77623668-77626419	inter
LNCA_21_P0010370	0.00995311	3.07769	lncRNA	Agilent_HUMAN_G3V2	ENST00000458154	chr22	20330731	20330790	-	NA	NA	NA	Unknown
CUST_15869_PI429285431	0.0434491	3.0747	lncRNA	lncipedia2.1	>lnc-CELF4-1:1	chr18	36052468	36053153	-	NA	NA	NA	inter
CUST_7265_PI429285431	0.00117098	3.07381	lncRNA	gencode_v17	>transcript_id "ENST00000364713.1" | genecode_v17	chr9	107859037	107859342	+	NA	NA	NA	inter
LNCA_21_P0007080	0.030591	3.06223	lncRNA	Agilent_HUMAN_G3V2	TCONS_00018828	chr10	120001249	120004910	+	NA	NA	NA	Unknown
CUST_3321_PI429285431	0.00272461	3.05349	lncRNA	gencode_v17	>transcript_id "ENST00000520149.2" | genecode_v17	chr8	134898739	134899320	+	NA	NA	NA	inter
CUST_18602_PI429285431	0.0420095	3.05013	lncRNA	lncipedia2.1	>lnc-AC005493.1-1:1	chr7	34911111	34911451	-	NPSR1	NA	chr7:34901111-34917944	inner
CUST_45377_PI429285431	0.00124554	3.05	lncRNA	ncbi	>gi|397139334|ref|XR_158848.1| PREDICTED: Homo sapiens uncharacterized LOC100653206 (LOC100653206), misc_RNA	NA	NA	NA	NA	NA	NA	NA	Unknown
CUST_2983_PI429285431	0.000805023	3.04644	lncRNA	gencode_v17	>transcript_id "ENST00000523090.1" | genecode_v17	chr8	5893955	5894285	-	NA	NA	NA	inter
LNCA_21_P0014944	0.00577146	3.04608	lncRNA	Agilent_HUMAN_G3V2	XR_133524	chr9	90681408	90681467	-	NA	NA	NA	Unknown
LNCA_21_P0010471	0.00218122	3.03983	lncRNA	Agilent_HUMAN_G3V2	TCONS_00029852	chr22	51038473	51038532	+	NA	NA	NA	Unknown
CUST_41894_PI429285431	0.0035905	3.03895	lncRNA	ensembl.GRCh37.72	>ENST00000581357 ncrna:miRNA chromosome:GRCh37:1:45011165:45011224:1 gene:ENSG00000263381 gene_biotype:miRNA transcript_biotype:miRNA	chr1	45011165	45011224	+	RNF220	NA	chr1:45001165-45021224	inner
CUST_26074_PI429285431	0.0219376	3.03834	lncRNA	lncipedia2.1	>lnc-GABPA-3:1	chr21	27843070	27843850	+	CYYR1	NA	chr21:27838528-27853421	inner
CUST_27200_PI429285431	0.0150115	3.03575	lncRNA	NONCODERv3	>n324332|NULL|mRNAlikelncRNA|Homosapiens|vegalncRNA|GENCODE|OTTHUMT00000042822|http://vega.sanger.ac.uk/Homo_sapiens/Transcript/Summary?db=core;t=OTTHUMT00000042822|-0.7797790|-0.2531395	chr6	156856051	156856583	-	NA	hg19_refFlat_SEPP1:range=chr5:42800822-428108695'pad=0,hg19_refFlat_SEPP1:range=chr5:42800822-428108695'pad=0 3'pad=0 strand=- repeatMasking=none,-81.10;hg19_refFlat_TCF4:range=chr18:52895456-533031285'pad=0,hg19_refFlat_TCF4:range=chr18:52895456-533031285'pad=0 3'pad=0 strand=- repeatMasking=none,-77.10	NA	inter
LNCA_21_P0010079	0.00047293	3.03435	lncRNA	Agilent_HUMAN_G3V2	TCONS_00028493	chr20	5479042	5479101	+	NA	NA	NA	Unknown
CUST_15281_PI429285431	0.00943981	3.0334	lncRNA	lncipedia2.1	>lnc-CLN8-1:1	chr8	1748840	1749545	+	NA	NA	NA	inter
LNCA_21_P0002510	0.000665014	3.03122	lncRNA	Agilent_HUMAN_G3V2	TCONS_00004464	chr2	143628158	143628367	-	NA	NA	NA	Unknown
CUST_47452_PI429285431	0.0207849	3.02635	lncRNA	ncbi	>gi|224177541|ref|NR_027006.1| Homo sapiens chromosome 14 open reading frame 166B pseudogene (LOC400891), non-coding RNA	Chr22	21403249	21405401	+	NA	hg19_refFlat_C15orf40:range=chr15:83659385-836803595'pad=0,hg19_refFlat_C15orf40:range=chr15:83659385-836803595'pad=0 3'pad=0 strand=- repeatMasking=none,-81.30;hg19_refFlat_NEK4:range=chr3:52745793-528047625'pad=0,hg19_refFlat_NEK4:range=chr3:52745793-528047625'pad=0 3'pad=0 strand=- repeatMasking=none,-85.60;hg19_refFlat_SUGT1:range=chr13:53227056-532619705'pad=0,hg19_refFlat_SUGT1:range=chr13:…	NA	inter
CUST_48268_PI429285431	0.0196759	3.02208	lncRNA	UCSC	>hg19_lincRNAsTranscripts_TCONS_l2_00000991 range=chr1:2568357-2574635 5'pad=0 3'pad=0 strand=- repeatMasking=none	chr1	2571357	2573226	-	TTC34	NA	chr1:2572807-2584635	inner
CUST_37371_PI429285431	0.0227967	3.02121	lncRNA	NONCODERv3	>n345821|NULL|lincRNA|Homosapiens|HumanlincRNA|ScriptureReconstructionLincRNAsByLuo[unpublished]|linc_luo_1370|NULL|-1.6740000|-0.2627102	chr8	17661381	17662086	-	MTUS1	NA	chr8:17651381-17658426	inter
CUST_29122_PI429285431	0.00661498	3.01436	lncRNA	NONCODERv3	>n326622|NULL|mRNAlikelncRNA|Homosapiens|vegalncRNA|GENCODE|OTTHUMT00000021840|http://vega.sanger.ac.uk/Homo_sapiens/Transcript/Summary?db=core;t=OTTHUMT00000021840|-1.2531500|-0.2039358	chr1	47999390	47999796	-	NA	NA	NA	inter
CUST_14026_PI429285431	0.0136937	3.00773	lncRNA	lncipedia2.1	>lnc-ETV3-2:2	chr1	157257772	157258163	-	NA	NA	NA	inter
CUST_16954_PI429285431	0.0471963	3.00621	lncRNA	lncipedia2.1	>lnc-HNF1A-1:1	chr12	121345458	121345818	+	SPPL3	NA	chr12:121335458-121342155	inter
CUST_35186_PI429285431	0.0355632	3.00562	lncRNA	NONCODERv3	>n342164|BC019245|mRNAlikelncRNA|Homosapiens|HumanlncRNA|JounralRNA|4651|NULL|-1.2080000|-0.3114501	chr6	161984666	161986416	-	PARK2	NA	chr6:161974666-161996399	inner
CUST_3603_PI429285431	0.0472105	3.00425	lncRNA	gencode_v17	>transcript_id "ENST00000425246.1" | genecode_v17	chr10	5650438	5651050	-	NA	NA	NA	inter
LNCA_21_P0003808	0.000124855	3.00005	lncRNA	Agilent_HUMAN_G3V2	TCONS_00008681	chr4	184251376	184251435	-	NA	NA	NA	Unknown
CUST_24160_PI429285431	0.0387241	2.99467	lncRNA	lncipedia2.1	>lnc-CHAD-1:1	chr17	48553508	48556032	-	RSAD1	hg19_refFlat_TCEANC:range=chrX:13677806-136816835'pad=0,hg19_refFlat_TCEANC:range=chrX:13677806-136816835'pad=0 3'pad=0 strand=+ repeatMasking=none,-86.20;hg19_refFlat_FAM122C:range=chrX:133941629-1339434035'pad=0,hg19_refFlat_FAM122C:range=chrX:133941629-1339434035'pad=0 3'pad=0 strand=+ repeatMasking=none,-82.50;hg19_refFlat_ZNF410:range=chr14:74358879-743915065'pad=0,hg19_refFlat_ZNF410:range=…	NA	inter
CUST_16096_PI429285431	0.0140447	2.99041	lncRNA	lncipedia2.1	>lnc-ZSWIM2-7:2	chr2	186031776	186032156	-	NA	NA	NA	inter
CUST_51686_PI429285431	0.0341353	2.9855	lncRNA	UCSC	>hg19_lincRNAsTranscripts_TCONS_l2_00011604 range=chr17:76489237-76495428 5'pad=0 3'pad=0 strand=+ repeatMasking=none	chr17	76489237	76490168	+	DNAH17	hg19_refFlat_RGS3:range=chr9:116222537-1163592335'pad=0,hg19_refFlat_RGS3:range=chr9:116222537-1163592335'pad=0 3'pad=0 strand=+ repeatMasking=none,-72.10;hg19_refFlat_CYB561D1:range=chr1:110036762-1100383975'pad=0,hg19_refFlat_CYB561D1:range=chr1:110036762-1100383975'pad=0 3'pad=0 strand=+ repeatMasking=none,-74.80;hg19_refFlat_ADAMTS2:range=chr5:178578130-1787723295'pad=0,hg19_refFlat_ADAMTS2:r…	NA	inner
LNCA_21_P0014723	0.0157887	2.97617	lncRNA	Agilent_HUMAN_G3V2	XR_112768	chr5	122422911	122422970	-	NA	NA	NA	Unknown
CUST_30357_PI429285431	0.0477531	2.97196	lncRNA	NONCODERv3	>n335451|AY684333|mRNAlikelncRNA|Homosapiens|NULL|H-invitationalv7.5|HIT000257116_10|http://h-invitational.jp/hinv/spsoup/transcript_view?hit_id=HIT000257116_10|-1.0756200|-0.0398890	chr6	3633668	3633998	-	NA	NA	NA	inter
CUST_29072_PI429285431	0.0174413	2.96445	lncRNA	NONCODERv3	>n326564|NULL|mRNAlikelncRNA|Homosapiens|vegalncRNA|GENCODE|OTTHUMT00000026418|http://vega.sanger.ac.uk/Homo_sapiens/Transcript/Summary?db=core;t=OTTHUMT00000026418|-1.2092400|-0.3188480	chr1	73873486	73874042	+	NA	NA	NA	inter
CUST_31402_PI429285431	0.0320545	2.96298	lncRNA	NONCODERv3	>n337869|D16472|mRNAlikelncRNA|Homosapiens|HumanlncRNA|JounralRNA|252|NULL|-1.0198400|-0.3892133	chrX	138005322	138005937	+	FGF13	NA	chrX:137992322-138015938	inner
CUST_37582_PI429285431	0.0435555	2.95976	lncRNA	NONCODERv3	>n346058|NULL|lincRNA|Homosapiens|HumanlincRNA|ScriptureReconstructionLincRNAsByLuo[unpublished]|linc_luo_1608|NULL|-1.3006800|-0.3158944	chr6	138144786	138147785	-	NA	hg19_refFlat_CSF2RA:range=chrY:1351597-13783725'pad=0,hg19_refFlat_CSF2RA:range=chrY:1351597-13783725'pad=0 3'pad=0 strand=+ repeatMasking=none,-80.70;hg19_refFlat_ZNF429:range=chr19:21688574-217208805'pad=0,hg19_refFlat_ZNF429:range=chr19:21688574-217208805'pad=0 3'pad=0 strand=+ repeatMasking=none,-84.10;hg19_refFlat_ST6GAL2:range=chr2:107429598-1074604335'pad=0,hg19_refFlat_ST6GAL2:range=chr2:…	NA	inter
CUST_27859_PI429285431	0.0103906	2.95425	lncRNA	NONCODERv3	>n325095|NULL|mRNAlikelncRNA|Homosapiens|vegalncRNA|GENCODE|OTTHUMT00000326022|http://vega.sanger.ac.uk/Homo_sapiens/Transcript/Summary?db=core;t=OTTHUMT00000326022|-0.2675370|-0.1547687	chr2	240815649	240816077	-	NA	hg19_refFlat_ZNF195:range=chr11:3380348-33948215'pad=0,hg19_refFlat_ZNF195:range=chr11:3380348-33948215'pad=0 3'pad=0 strand=- repeatMasking=none,-79.70;hg19_refFlat_ZNF195:range=chr11:3380348-34002705'pad=0,hg19_refFlat_ZNF195:range=chr11:3380348-34002705'pad=0 3'pad=0 strand=- repeatMasking=none,-79.70;hg19_refFlat_DUOXA1:range=chr15:45409713-454152125'pad=0,hg19_refFlat_DUOXA1:range=chr15:4540…	NA	inter
CUST_41515_PI429285431	0.016456	2.95266	lncRNA	ensembl.GRCh37.72	>ENST00000582152 ncrna:miRNA chromosome:GRCh37:2:109757946:109758044:-1 gene:ENSG00000264934 gene_biotype:miRNA transcript_biotype:miRNA	chr2	109757946	109758044	-	SH3RF3	NA	chr2:109747946-109768044	inner
LNCA_21_P0006323	0.00480757	2.94964	lncRNA	Agilent_HUMAN_G3V2	TCONS_00016482	chr9	131213485	131213544	-	NA	NA	NA	Unknown
LNCA_21_P0010898	0.000412851	2.94962	lncRNA	Agilent_HUMAN_G3V2	TCONS_l2_00003718	chr10	96857903	96857962	-	NA	NA	NA	Unknown
CUST_3462_PI429285431	0.0359969	2.94898	lncRNA	gencode_v17	>transcript_id "ENST00000418478.1" | genecode_v17	chr9	88400637	88400996	-	NA	hg19_refFlat_KIF27:range=chr9:86451916-865305065'pad=0,hg19_refFlat_KIF27:range=chr9:86451916-865305065'pad=0 3'pad=0 strand=- repeatMasking=none,-81.40	NA	inter
CUST_15005_PI429285431	0.00859454	2.94611	lncRNA	lncipedia2.1	>lnc-SPRY2-1:1	chr13	80648614	80650503	-	NA	hg19_refFlat_PTBP3:range=chr9:114982452-1150601455'pad=0,hg19_refFlat_PTBP3:range=chr9:114982452-1150601455'pad=0 3'pad=0 strand=- repeatMasking=none,-79.30;hg19_refFlat_ZNF700:range=chr19:12037391-120610685'pad=0,hg19_refFlat_ZNF700:range=chr19:12037391-120610685'pad=0 3'pad=0 strand=+ repeatMasking=none,-79.00	NA	inter
CUST_31715_PI429285431	0.0321875	2.94492	lncRNA	NONCODERv3	>n338243|BC044788|mRNAlikelncRNA|Homosapiens|HumanlncRNA|JounralRNA|636|NULL|-0.9029630|-0.4234416	chr14	30169404	30170217	-	PRKD1	NA	chr14:30156404-30180138	inner
CUST_34394_PI429285431	0.00793879	2.94213	lncRNA	NONCODERv3	>n341265|BX647900|mRNAlikelncRNA|Homosapiens|HumanlncRNA|JounralRNA|3733|NULL|-0.9284320|-0.4067304	chr7	84161791	84164790	+	NA	NA	NA	inter
CUST_13674_PI429285431	0.0453249	2.94147	lncRNA	lncipedia2.1	>lnc-PRPF4-1:1	chr9	116072658	116072963	+	WDR31	NA	chr9:116077930-116082854	inter
CUST_28339_PI429285431	0.039211	2.93969	lncRNA	NONCODERv3	>n325645|NULL|mRNAlikelncRNA|Homosapiens|vegalncRNA|GENCODE|OTTHUMT00000045661|http://vega.sanger.ac.uk/Homo_sapiens/Transcript/Summary?db=core;t=OTTHUMT00000045661|-1.2763900|-0.3975231	chr13	100391116	100391576	-	CLYBL	NA	chr13:100381116-100404619	inner
LNCA_19_P00316694	0.0409603	2.93822	lncRNA	Agilent_HUMAN_G3V2	XR_108679	chr6	14281048	14281107	-	NA	NA	NA	Unknown
CUST_15488_PI429285431	0.0221016	2.93692	lncRNA	lncipedia2.1	>lnc-GCNT7-1:1	chr20	55043176	55043707	-	C20orf43	NA	chr20:55043647-55053472	inter
CUST_28705_PI429285431	0.0296422	2.93353	lncRNA	NONCODERv3	>n326094|NULL|mRNAlikelncRNA|Homosapiens|vegalncRNA|GENCODE|OTTHUMT00000046510|http://vega.sanger.ac.uk/Homo_sapiens/Transcript/Summary?db=core;t=OTTHUMT00000046510|-1.0542600|-0.2452401	chr10	4447496	4448186	-	NA	NA	NA	inter
CUST_35067_PI429285431	0.034159	2.93236	lncRNA	NONCODERv3	>n342018|BC007821|mRNAlikelncRNA|Homosapiens|HumanlncRNA|JounralRNA|4499|NULL|-1.1470300|-0.2072027	chr12	110171129	110172265	-	TRPV4	hg19_refFlat_MRPL10:range=chr17:45901571-459065865'pad=0,hg19_refFlat_MRPL10:range=chr17:45901571-459065865'pad=0 3'pad=0 strand=- repeatMasking=none,-78.90;hg19_refFlat_LOC100506688:range=chr5:989429-9899595'pad=0,hg19_refFlat_LOC100506688:range=chr5:989429-9899595'pad=0 3'pad=0 strand=- repeatMasking=none,-82.30;hg19_refFlat_ADRA1A:range=chr8:26606107-267224865'pad=0,hg19_refFlat_ADRA1A:range=c…	NA	inter
CUST_19692_PI429285431	0.0305915	2.93045	lncRNA	lncipedia2.1	>lnc-BLID-1:6	chr11	121972155	121972901	-	NA	NA	NA	inter
CUST_2116_PI429285431	0.0480966	2.91939	lncRNA	gencode_v17	>transcript_id "ENST00000507926.1" | genecode_v17	chr5	25415755	25416123	-	NA	NA	NA	inter
CUST_35887_PI429285431	0.0300685	2.91832	lncRNA	NONCODERv3	>n344549|NULL|lincRNA|Homosapiens|HumanlincRNA|ScriptureReconstructionLincRNAsByLuo[unpublished]|linc_luo_97|NULL|-1.3386900|-0.3545874	chr5	88236140	88239139	+	NA	hg19_refFlat_TSFM:range=chr12:58176585-581903665'pad=0,hg19_refFlat_TSFM:range=chr12:58176585-581903665'pad=0 3'pad=0 strand=+ repeatMasking=none,-41.30;hg19_refFlat_CYB561D1:range=chr1:110036762-1100388815'pad=0,hg19_refFlat_CYB561D1:range=chr1:110036762-1100388815'pad=0 3'pad=0 strand=+ repeatMasking=none,-79.20;hg19_refFlat_FAM122C:range=chrX:133941629-1339434035'pad=0,hg19_refFlat_FAM122C:ran…	NA	inter
LNCA_21_P0013215	0.0223192	2.91504	lncRNA	Agilent_HUMAN_G3V2	TCONS_l2_00025933	chr7	63611167	63611226	+	NA	NA	NA	Unknown
LNCA_21_P0012126	0.0454648	2.90662	lncRNA	Agilent_HUMAN_G3V2	TCONS_l2_00016333	chr20	50957174	51044594	+	NA	NA	NA	Unknown
CUST_14616_PI429285431	0.0439943	2.90342	lncRNA	lncipedia2.1	>lnc-PDZRN4-1:1	chr12	42159122	42159602	+	NA	NA	NA	inter
CUST_10012_PI429285431	0.036977	2.89929	lncRNA	lncipedia2.1	>lnc-SLC17A9-4:1	chr20	61716286	61719285	+	NA	NA	NA	inter
LNCA_21_P0010806	0.0012285	2.89173	lncRNA	Agilent_HUMAN_G3V2	TCONS_l2_00002904	chr10	19444062	19444121	+	NA	NA	NA	Unknown
CUST_37561_PI429285431	0.0170165	2.89062	lncRNA	NONCODERv3	>n346036|NULL|lincRNA|Homosapiens|HumanlincRNA|ScriptureReconstructionLincRNAsByLuo[unpublished]|linc_luo_1586|NULL|-1.4286700|-0.3416271	chr6	138144786	138147299	+	NA	hg19_refFlat_ZNF701:range=chr19:53075495-530867105'pad=0,hg19_refFlat_ZNF701:range=chr19:53075495-530867105'pad=0 3'pad=0 strand=+ repeatMasking=none,-88.60;hg19_refFlat_LOC100506688:range=chr5:989429-9899595'pad=0,hg19_refFlat_LOC100506688:range=chr5:989429-9899595'pad=0 3'pad=0 strand=- repeatMasking=none,-85.90;hg19_refFlat_KCNRG:range=chr13:50589630-505943635'pad=0,hg19_refFlat_KCNRG:range=ch…	NA	inter
LNCA_21_P0006249	0.0147908	2.8879	lncRNA	Agilent_HUMAN_G3V2	TCONS_00016263	chr9	5308119	5308178	-	NA	NA	NA	Unknown
CUST_30595_PI429285431	0.0322549	2.88572	lncRNA	NONCODERv3	>n335889|X64158|mRNAlikelncRNA|Homosapiens|NULL|H-invitationalv7.5|HIT000322657|http://h-invitational.jp/hinv/spsoup/transcript_view?hit_id=HIT000322657|2.5012000|-0.0816055	chr14	106329408	106329782	-	NA	NA	NA	inter
CUST_37386_PI429285431	0.0187624	2.87806	lncRNA	NONCODERv3	>n345837|NULL|lincRNA|Homosapiens|HumanlincRNA|ScriptureReconstructionLincRNAsByLuo[unpublished]|linc_luo_1386|NULL|-1.4896900|-0.2016896	chr10	134824209	134825294	-	NA	NA	NA	inter
CUST_4454_PI429285431	0.00396351	2.87783	lncRNA	gencode_v17	>transcript_id "ENST00000543611.1" | genecode_v17	chr12	123171672	123173402	+	HCAR3	hg19_refFlat_HCAR1:range=chr12:123213846-1232148865'pad=0,hg19_refFlat_HCAR1:range=chr12:123213846-1232148865'pad=0 3'pad=0 strand=- repeatMasking=none,-78.80;hg19_refFlat_HCAR2:range=chr12:123186739-1231878305'pad=0,hg19_refFlat_HCAR2:range=chr12:123186739-1231878305'pad=0 3'pad=0 strand=- repeatMasking=none,-93.10;hg19_refFlat_HCAR3:range=chr12:123200121-1232012845'pad=0,hg19_refFlat_HCAR3:rang…	NA	inner
CUST_3773_PI429285431	0.0394443	2.8745	lncRNA	gencode_v17	>transcript_id "ENST00000422661.1" | genecode_v17	chr10	103012578	103014799	-	NA	hg19_refFlat_TCEANC:range=chrX:13677806-136816835'pad=0,hg19_refFlat_TCEANC:range=chrX:13677806-136816835'pad=0 3'pad=0 strand=+ repeatMasking=none,-76.00;hg19_refFlat_MCU:range=chr10:74451910-746455805'pad=0,hg19_refFlat_MCU:range=chr10:74451910-746455805'pad=0 3'pad=0 strand=+ repeatMasking=none,-79.10;hg19_refFlat_ITGB3BP:range=chr1:63912478-639888045'pad=0,hg19_refFlat_ITGB3BP:range=chr1:6391…	NA	inter
CUST_32462_PI429285431	0.00754498	2.87413	lncRNA	NONCODERv3	>n339064|CR600549|mRNAlikelncRNA|Homosapiens|HumanlncRNA|JounralRNA|1493|NULL|-0.5197510|-0.4881735	chr16	6811563	6812654	-	RBFOX1	hg19_refFlat_MAP4K1:range=chr19:39078450-391085355'pad=0,hg19_refFlat_MAP4K1:range=chr19:39078450-391085355'pad=0 3'pad=0 strand=- repeatMasking=none,-73.60;hg19_refFlat_LOC100506688:range=chr5:989429-9899595'pad=0,hg19_refFlat_LOC100506688:range=chr5:989429-9899595'pad=0 3'pad=0 strand=- repeatMasking=none,-69.10;hg19_refFlat_ASCC1:range=chr10:73862127-739730565'pad=0,hg19_refFlat_ASCC1:range=ch…	NA	inner
LNCA_21_P0003775	0.000462814	2.86548	lncRNA	Agilent_HUMAN_G3V2	TCONS_00008588	chr4	139202778	139202837	-	NA	NA	NA	Unknown
CUST_17611_PI429285431	0.00251334	2.86402	lncRNA	lncipedia2.1	>lnc-C12orf68-1:2	chr12	48637284	48639240	+	NA	hg19_refFlat_NOS3:range=chr7:150690892-1507004915'pad=0,hg19_refFlat_NOS3:range=chr7:150690892-1507004915'pad=0 3'pad=0 strand=+ repeatMasking=none,-76.50;hg19_refFlat_ZNF195:range=chr11:3380348-33948215'pad=0,hg19_refFlat_ZNF195:range=chr11:3380348-33948215'pad=0 3'pad=0 strand=- repeatMasking=none,-79.80;hg19_refFlat_DISC1:range=chr1:231762614-2321725775'pad=0,hg19_refFlat_DISC1:range=chr1:2317…	NA	inter
CUST_2958_PI429285431	0.0215065	2.86308	lncRNA	gencode_v17	>transcript_id "ENST00000427073.1" | genecode_v17	chr7	156737415	156737945	+	NOM1	NA	chr7:156742417-156748339	inter
CUST_11313_PI429285431	0.0250106	2.86052	lncRNA	lncipedia2.1	>lnc-EIF5-1:1	chr14	103784587	103785409	+	NA	NA	NA	inter
CUST_28608_PI429285431	0.0328992	2.85863	lncRNA	NONCODERv3	>n325973|NULL|mRNAlikelncRNA|Homosapiens|vegalncRNA|GENCODE|OTTHUMT00000047900|http://vega.sanger.ac.uk/Homo_sapiens/Transcript/Summary?db=core;t=OTTHUMT00000047900|-1.3400800|-0.3792211	chr10	48608126	48608616	-	NA	hg19_refFlat_C15orf40:range=chr15:83677162-836803595'pad=0,hg19_refFlat_C15orf40:range=chr15:83677162-836803595'pad=0 3'pad=0 strand=- repeatMasking=none,-69.60;hg19_refFlat_KCNRG:range=chr13:50589630-505943635'pad=0,hg19_refFlat_KCNRG:range=chr13:50589630-505943635'pad=0 3'pad=0 strand=+ repeatMasking=none,-79.60;hg19_refFlat_BRD2:range=chr6_mcf_hap5:4277541-42838425'pad=0,hg19_refFlat_BRD2:rang…	NA	inter
CUST_26872_PI429285431	0.01514	2.85113	lncRNA	NONCODERv3	>n323947|NULL|mRNAlikelncRNA|Homosapiens|vegalncRNA|GENCODE|OTTHUMT00000054804|http://vega.sanger.ac.uk/Homo_sapiens/Transcript/Summary?db=core;t=OTTHUMT00000054804|-1.2062600|-0.2745547	chr9	134812276	134812801	+	MED27	NA	chr9:134802276-134826764	inner
LNCA_21_P0010420	0.0148893	2.85082	lncRNA	Agilent_HUMAN_G3V2	TCONS_00029613	chr22	44736146	44740361	+	NA	NA	NA	Unknown
CUST_5838_PI429285431	0.00708251	2.84959	lncRNA	gencode_v17	>transcript_id "ENST00000577621.1" | genecode_v17	chr17	37165545	37166054	-	NA	NA	NA	inter
CUST_11403_PI429285431	0.0028964	2.84018	lncRNA	lncipedia2.1	>lnc-AL355490.1-1:1	chr10	99185780	99186673	-	PGAM1	hg19_refFlat_ANKDD1A:range=chr15:65204130-652495275'pad=0,hg19_refFlat_ANKDD1A:range=chr15:65204130-652495275'pad=0 3'pad=0 strand=+ repeatMasking=none,-71.10;hg19_refFlat_STAP2:range=chr19:4324130-43387505'pad=0,hg19_refFlat_STAP2:range=chr19:4324130-43387505'pad=0 3'pad=0 strand=- repeatMasking=none,-79.40;hg19_refFlat_RHBG:range=chr1:156339204-1563546375'pad=0,hg19_refFlat_RHBG:range=chr1:1563…	NA	inter
CUST_44788_PI429285431	0.0493937	2.83337	lncRNA	ncbi	>gi|168693608|ref|NR_015362.1| Homo sapiens tumor suppressor TSG1 (TSG1), non-coding RNA	Chr6	94416801	94419800	+	NA	NA	NA	inter
CUST_33857_PI429285431	0.0464107	2.82852	lncRNA	NONCODERv3	>n340643|D86519|mRNAlikelncRNA|Homosapiens|HumanlncRNA|JounralRNA|3105|NULL|4.5734200|-0.2324759	chr5	137143461	137145417	+	NA	NA	NA	inter
CUST_11331_PI429285431	0.0291566	2.81724	lncRNA	lncipedia2.1	>lnc-C11orf89-1:4	chr11	2006673	2008886	-	NA	hg19_refFlat_BTBD9:range=chr6:38142761-385621115'pad=0,hg19_refFlat_BTBD9:range=chr6:38142761-385621115'pad=0 3'pad=0 strand=- repeatMasking=none,-65.10;hg19_refFlat_IFT81:range=chr12:110565186-1106057835'pad=0,hg19_refFlat_IFT81:range=chr12:110565186-1106057835'pad=0 3'pad=0 strand=+ repeatMasking=none,-80.40	NA	inter
LNCA_21_P0014655	0.0116575	2.81493	lncRNA	Agilent_HUMAN_G3V2	XR_110918	chr11	65556522	65556581	-	NA	NA	NA	Unknown
CUST_14579_PI429285431	0.000950394	2.81316	lncRNA	lncipedia2.1	>lnc-RP11-342M21.2.1-1:5	chr15	67279496	67280543	-	NA	NA	NA	inter
CUST_13439_PI429285431	0.0329732	2.80761	lncRNA	lncipedia2.1	>lnc-JPH4-1:6	chr14	24198787	24199433	-	NA	NA	NA	inter
CUST_12561_PI429285431	0.0183723	2.80579	lncRNA	lncipedia2.1	>lnc-PDCD6IP-2:4	chr3	34476785	34477669	+	NA	NA	NA	inter
LNCA_19_P00316185	0.00240025	2.80401	lncRNA	Agilent_HUMAN_G3V2	TCONS_00012257	chr6	113944433	113944492	-	NA	NA	NA	Unknown
CUST_27060_PI429285431	0.0342034	2.80246	lncRNA	NONCODERv3	>n324171|NULL|mRNAlikelncRNA|Homosapiens|vegalncRNA|GENCODE|OTTHUMT00000051452|http://vega.sanger.ac.uk/Homo_sapiens/Transcript/Summary?db=core;t=OTTHUMT00000051452|-1.1412500|-0.5238864	chr9	62705	63232	+	NA	NA	NA	inter
CUST_36053_PI429285431	0.0202104	2.80233	lncRNA	NONCODERv3	>n344650|NULL|lincRNA|Homosapiens|HumanlincRNA|ScriptureReconstructionLincRNAsByLuo[unpublished]|linc_luo_198|NULL|-1.5167100|-0.2605905	chr1	159946783	159948103	-	NA	NA	NA	inter
CUST_10884_PI429285431	0.000533661	2.80169	lncRNA	lncipedia2.1	>lnc-GIN1-1:2	chr5	102589029	102589513	-	C5orf30	NA	chr5:102594442-102599220	inter
CUST_52053_PI429285431	0.033707	2.79585	lncRNA	UCSC	>hg19_lincRNAsTranscripts_TCONS_l2_00017085 range=chr21:44851213-44859330 5'pad=0 3'pad=0 strand=+ repeatMasking=none	chr21	44854213	44857212	+	SIK1	hg19_refFlat_SGCE:range=chr7:94214811-942854105'pad=0,hg19_refFlat_SGCE:range=chr7:94214811-942854105'pad=0 3'pad=0 strand=- repeatMasking=none,-75.60;hg19_refFlat_ISY1:range=chr3:128848924-1288798185'pad=0,hg19_refFlat_ISY1:range=chr3:128848924-1288798185'pad=0 3'pad=0 strand=- repeatMasking=none,-82.20;hg19_refFlat_BIRC5:range=chr17:76210398-762196355'pad=0,hg19_refFlat_BIRC5:range=chr17:762103…	NA	inter
CUST_48808_PI429285431	0.00577547	2.79448	lncRNA	UCSC	>hg19_lincRNAsTranscripts_TCONS_l2_00015630 range=chr2:242458387-242459662 5'pad=0 3'pad=0 strand=+ repeatMasking=none	chr2	242458387	242459208	+	NA	hg19_refFlat_BIRC5:range=chr17:76210398-762196355'pad=0,hg19_refFlat_BIRC5:range=chr17:76210398-762196355'pad=0 3'pad=0 strand=+ repeatMasking=none,-66.50;hg19_refFlat_CAGE1:range=chr6:7329398-73874065'pad=0,hg19_refFlat_CAGE1:range=chr6:7329398-73874065'pad=0 3'pad=0 strand=- repeatMasking=none,-73.10;hg19_refFlat_PKP2:range=chr12:32945358-330496655'pad=0,hg19_refFlat_PKP2:range=chr12:32945358-3…	NA	inter
CUST_19056_PI429285431	0.0193965	2.78992	lncRNA	lncipedia2.1	>lnc-RSPH1-2:1	chr21	44034963	44036737	-	NA	NA	NA	inter
CUST_22528_PI429285431	0.0263508	2.78919	lncRNA	lncipedia2.1	>lnc-KIFC3-1:1	chr16	57735562	57736365	-	CCDC135	hg19_refFlat_CCDC135:range=chr16:57731862-577651705'pad=0,hg19_refFlat_CCDC135:range=chr16:57731862-577651705'pad=0 3'pad=0 strand=+ repeatMasking=none,-103.50;hg19_refFlat_GPR97:range=chr16:57702260-577223735'pad=0,hg19_refFlat_GPR97:range=chr16:57702260-577223735'pad=0 3'pad=0 strand=+ repeatMasking=none,-97.50chr16:57728713-57745642	NA	inner
CUST_49224_PI429285431	0.0473706	2.78889	lncRNA	UCSC	>hg19_lincRNAsTranscripts_TCONS_l2_00021469 range=chr4:187337206-187422182 5'pad=0 3'pad=0 strand=- repeatMasking=none	chr4	187337206	187338360	-	NA	NA	NA	inter
CUST_28102_PI429285431	0.0277886	2.78772	lncRNA	NONCODERv3	>n325374|NULL|mRNAlikelncRNA|Homosapiens|vegalncRNA|GENCODE|OTTHUMT00000324041|http://vega.sanger.ac.uk/Homo_sapiens/Transcript/Summary?db=core;t=OTTHUMT00000324041|-0.9171780|-0.3880978	chr2	22453970	22454538	+	NA	NA	NA	inter
CUST_4654_PI429285431	0.00504266	2.78715	lncRNA	gencode_v17	>transcript_id "ENST00000435281.1" | genecode_v17	chr13	78513297	78514198	-	NA	hg19_refFlat_TSFM:range=chr12:58176585-581903665'pad=0,hg19_refFlat_TSFM:range=chr12:58176585-581903665'pad=0 3'pad=0 strand=+ repeatMasking=none,-31.70;hg19_refFlat_ZNF429:range=chr19:21688574-217208805'pad=0,hg19_refFlat_ZNF429:range=chr19:21688574-217208805'pad=0 3'pad=0 strand=+ repeatMasking=none,-83.60;hg19_refFlat_FBLIM1:range=chr1:16091479-161015265'pad=0,hg19_refFlat_FBLIM1:range=chr1:16…	NA	inner
CUST_19235_PI429285431	0.00189125	2.78522	lncRNA	lncipedia2.1	>lnc-HMGB4-1:5	chr1	34339149	34339706	+	CSMD2	NA	chr1:34329149-34349248	inner
LNCA_21_P0002150	0.000552931	2.78324	lncRNA	Agilent_HUMAN_G3V2	ENST00000446593	chr2	242989849	242989908	-	NA	NA	NA	Unknown
CUST_2615_PI429285431	0.00865571	2.78283	lncRNA	gencode_v17	>transcript_id "ENST00000446358.1" | genecode_v17	chr6	114802589	114803374	-	NA	NA	NA	inter
CUST_9722_PI429285431	0.0388244	2.7746	lncRNA	lncipedia2.1	>lnc-TMEM132B-2:2	chr12	126511752	126512097	+	NA	NA	NA	inter
CUST_32306_PI429285431	0.0301153	2.77415	lncRNA	NONCODERv3	>n338883|L37703|mRNAlikelncRNA|Homosapiens|HumanlncRNA|JounralRNA|1309|NULL|-0.7568000|-0.1859110	chr2	74225463	74225672	-	NA	NA	NA	inter
CUST_1970_PI429285431	0.0109685	2.77212	lncRNA	gencode_v17	>transcript_id "ENST00000504509.1" | genecode_v17	chr4	171195070	171195538	+	NA	NA	NA	inter
CUST_14452_PI429285431	0.018736	2.76759	lncRNA	lncipedia2.1	>lnc-EGLN1-1:7	chr1	231663868	231664283	-	TSNAX	NA	chr1:231664399-231674001	inter
CUST_48489_PI429285431	0.0018376	2.76689	lncRNA	UCSC	>hg19_lincRNAsTranscripts_TCONS_l2_00000923 range=chr1:241577019-241596639 5'pad=0 3'pad=0 strand=+ repeatMasking=none	chr1	241577019	241577307	+	NA	NA	NA	inter
CUST_4645_PI429285431	0.0110046	2.76292	lncRNA	gencode_v17	>transcript_id "ENST00000595711.1" | genecode_v17	chr13	75126640	75127462	+	NA	NA	NA	inter
CUST_35665_PI429285431	0.0459749	2.7608	lncRNA	NONCODERv3	>n342824|X64982|mRNAlikelncRNA|Homosapiens|HumanlncRNA|JounralRNA|5327|NULL|1.5739000|-0.1557463	chr7	141587321	141587663	+	OR9A4	NA	chr7:141577321-141597664	inter
LNCA_21_P0002564	0.0278914	2.75948	lncRNA	Agilent_HUMAN_G3V2	TCONS_00004669	chr2	1567330	1567389	+	NA	NA	NA	Unknown
CUST_704_PI429285431	0.00861338	2.75941	lncRNA	gencode_v17	>transcript_id "ENST00000592365.1" | genecode_v17	chr2	6775252	6776164	-	NA	NA	NA	inter
CUST_38049_PI429285431	0.0432168	2.75602	lncRNA	NONCODERv3	>n377622|NULL|lncRNA|Homosapiens|HumanlincRNA|BodyMapLinc|TCONS_00030008||-1.1602600|-0.2889008	chr6	1272215	1272851	+	NA	NA	NA	inter
CUST_310_PI429201921	0.0040175	2.75123	lncRNA	Affy_HUMAN_HTA2.0	linc-ARHGEF7-1	chr13	111748184	111755444	+	NA	NA	NA	Unknown
LNCA_19_P00320536	0.00251715	2.75119	lncRNA	Agilent_HUMAN_G3V2	XR_109752	chr22	25875203	25875262	+	NA	NA	NA	Unknown
LNCA_21_P0011885	0.00432236	2.74995	lncRNA	Agilent_HUMAN_G3V2	TCONS_l2_00014323	chr2	241874568	241874627	+	NA	NA	NA	Unknown
CUST_12126_PI429285431	0.022269	2.74816	lncRNA	lncipedia2.1	>lnc-PHF17-1:1	chr4	129581631	129581954	+	NA	NA	NA	inter
CUST_5772_PI429285431	0.0488708	2.7459	lncRNA	gencode_v17	>transcript_id "ENST00000591705.1" | genecode_v17	chr17	20451684	20453265	+	CDRT15L2	hg19_refFlat_TBC1D3:range=chr17:36285545-362946005'pad=0,hg19_refFlat_TBC1D3:range=chr17:36285545-362946005'pad=0 3'pad=0 strand=+ repeatMasking=none,-93.10;hg19_refFlat_TBC1D3C:range=chr17:34581400-345904545'pad=0,hg19_refFlat_TBC1D3C:range=chr17:34581400-345904545'pad=0 3'pad=0 strand=- repeatMasking=none,-93.10;hg19_refFlat_TBC1D3B:range=chr17:34493375-345024105'pad=0,hg19_refFlat_TBC1D3B:rang…	NA	inter
CUST_17120_PI429285431	0.00476021	2.7429	lncRNA	lncipedia2.1	>lnc-FOXD4L1-1:3	chr2	114265430	114266104	+	FOXD4L1	NA	chr2:114256661-114258727	inter
CUST_19046_PI429285431	0.0332487	2.73947	lncRNA	lncipedia2.1	>lnc-CSMD1-8:1	chr8	1784158	1785658	-	ARHGEF10	hg19_refFlat_ZNF714:range=chr19:21281075-213011355'pad=0,hg19_refFlat_ZNF714:range=chr19:21281075-213011355'pad=0 3'pad=0 strand=+ repeatMasking=none,-59.50;hg19_refFlat_ST6GAL2:range=chr2:107429598-1074604335'pad=0,hg19_refFlat_ST6GAL2:range=chr2:107429598-1074604335'pad=0 3'pad=0 strand=- repeatMasking=none,-66.40;hg19_refFlat_HSD11B1L:range=chr19:5684044-56879565'pad=0,hg19_refFlat_HSD11B1L:ra…	NA	inner
CUST_34991_PI429285431	0.0473411	2.73815	lncRNA	NONCODERv3	>n341916|AL833333|mRNAlikelncRNA|Homosapiens|HumanlncRNA|JounralRNA|4397|NULL|11.8217000|-0.1479888	chr12	50750426	50750843	-	LARP4	NA	chr12:50759382-50800405	inner
CUST_9659_PI429285431	0.0122292	2.73642	lncRNA	lncipedia2.1	>lnc-ATG2B-3:1	chr14	97473838	97474403	-	NA	NA	NA	inter
CUST_41080_PI429285431	0.0111083	2.73552	lncRNA	ensembl.GRCh37.72	>ENST00000401213 ncrna:miRNA chromosome:GRCh37:X:145072385:145072455:-1 gene:ENSG00000216032 gene_biotype:miRNA transcript_biotype:miRNA	chrX	145072385	145072455	-	NA	NA	NA	inter
CUST_8946_PI429285431	0.0365151	2.73524	lncRNA	lncipedia2.1	>lnc-RP11-809H16.2.1-2:8	chr15	69387041	69387912	+	NA	NA	NA	inter
CUST_16906_PI429285431	0.00597466	2.73502	lncRNA	lncipedia2.1	>lnc-CCDC74A-1:2	chr2	132310586	132311183	+	NA	NA	NA	inter
CUST_15739_PI429285431	0.00158108	2.73488	lncRNA	lncipedia2.1	>lnc-SLC35G4-2:1	chr18	11491562	11492180	+	NA	NA	NA	inter
CUST_22372_PI429285431	0.0139394	2.72942	lncRNA	lncipedia2.1	>lnc-SNURF-3:13	chr15	25467306	25470305	+	SNRPN	NA	chr15:25457306-25477432	inter
CUST_819_PI429285431	0.0359644	2.72934	lncRNA	gencode_v17	>transcript_id "ENST00000439700.1" | genecode_v17	chr2	28671034	28671882	-	NA	NA	NA	inter
CUST_12865_PI429285431	0.0418712	2.72919	lncRNA	lncipedia2.1	>lnc-TNFAIP3-3:2	chr6	138008231	138008746	+	NA	NA	NA	inter
CUST_29078_PI429285431	0.0417164	2.7291	lncRNA	NONCODERv3	>n326571|NULL|mRNAlikelncRNA|Homosapiens|vegalncRNA|GENCODE|OTTHUMT00000026184|http://vega.sanger.ac.uk/Homo_sapiens/Transcript/Summary?db=core;t=OTTHUMT00000026184|-1.2918700|-0.4203096	chr1	72987191	72987689	-	NA	NA	NA	inter
CUST_36293_PI429285431	0.0252193	2.72613	lncRNA	NONCODERv3	>n344819|NULL|lincRNA|Homosapiens|HumanlincRNA|ScriptureReconstructionLincRNAsByLuo[unpublished]|linc_luo_368|NULL|-1.2996100|-0.2370886	chr14	34509336	34510414	+	NA	NA	NA	inter
CUST_23713_PI429285431	0.0267815	2.72553	lncRNA	lncipedia2.1	>lnc-SNURFL-2:1	chrX	137709433	137709574	+	FGF13	NA	chrX:137713734-137719504	inter
CUST_30447_PI429285431	0.00946064	2.72377	lncRNA	NONCODERv3	>n335586|CR592857|mRNAlikelncRNA|Homosapiens|NULL|H-invitationalv7.5|HIT000272052|http://h-invitational.jp/hinv/spsoup/transcript_view?hit_id=HIT000272052|-0.2449660|-0.2062494	chr15	43891125	43891394	+	STRC	NA	chr15:43891761-43901600	inter
LNCA_21_P0014532	0.0146343	2.72219	lncRNA	Agilent_HUMAN_G3V2	XR_110225	chr14	75745669	75745728	-	NA	NA	NA	Unknown
CUST_43812_PI429285431	0.0496588	2.71959	lncRNA	ncbi	>gi|300796059|ref|NR_034113.1| Homo sapiens DNAJC27 antisense RNA 1 (DNAJC27-AS1), non-coding RNA	Chr2	25197981	25199675	+	NA	hg19_refFlat_TCF4:range=chr18:52895456-533031285'pad=0,hg19_refFlat_TCF4:range=chr18:52895456-533031285'pad=0 3'pad=0 strand=- repeatMasking=none,-88.00;hg19_refFlat_CAGE1:range=chr6:7329398-73874065'pad=0,hg19_refFlat_CAGE1:range=chr6:7329398-73874065'pad=0 3'pad=0 strand=- repeatMasking=none,-84.60;hg19_refFlat_JAM2:range=chr21:27012134-270866175'pad=0,hg19_refFlat_JAM2:range=chr21:27012134-270…	NA	inter
LNCA_21_P0007215	0.000419224	2.71438	lncRNA	Agilent_HUMAN_G3V2	THC2653254	chr11	61274039	61274098	+	NA	NA	NA	Unknown
CUST_27055_PI429285431	0.00370604	2.7141	lncRNA	NONCODERv3	>n324166|NULL|mRNAlikelncRNA|Homosapiens|vegalncRNA|GENCODE|OTTHUMT00000051497|http://vega.sanger.ac.uk/Homo_sapiens/Transcript/Summary?db=core;t=OTTHUMT00000051497|-0.4616460|-0.2048090	chr9	1031218	1031997	-	NA	NA	NA	inter
CUST_1034_PI429285431	0.0344473	2.71356	lncRNA	gencode_v17	>transcript_id "ENST00000449954.1" | genecode_v17	chr2	114270040	114270784	+	NA	hg19_refFlat_JAM2:range=chr21:27012134-270866175'pad=0,hg19_refFlat_JAM2:range=chr21:27012134-270866175'pad=0 3'pad=0 strand=+ repeatMasking=none,-67.80;hg19_refFlat_ZNF429:range=chr19:21688574-217208805'pad=0,hg19_refFlat_ZNF429:range=chr19:21688574-217208805'pad=0 3'pad=0 strand=+ repeatMasking=none,-80.20;hg19_refFlat_FBLIM1:range=chr1:16091479-161015265'pad=0,hg19_refFlat_FBLIM1:range=chr1:16…	NA	inter
CUST_49420_PI429285431	0.0378419	2.70955	lncRNA	UCSC	>hg19_lincRNAsTranscripts_TCONS_l2_00023269 range=chr5:175602430-175612423 5'pad=0 3'pad=0 strand=- repeatMasking=none	chr5	175602430	175603673	-	NA	NA	NA	inter
CUST_47381_PI429285431	0.0157786	2.70696	lncRNA	ncbi	>gi|310124058|ref|XR_109672.1| PREDICTED: Homo sapiens uncharacterized LOC100506403 (LOC100506403), misc_RNA	NA	NA	NA	NA	NA	NA	NA	Unknown
LNCA_21_P0004774	0.0252295	2.70668	lncRNA	Agilent_HUMAN_G3V2	ENST00000438522	chr6	114798529	114798588	-	NA	NA	NA	Unknown
CUST_2141_PI429285431	0.04014	2.7019	lncRNA	gencode_v17	>transcript_id "ENST00000513039.2" | genecode_v17	chr5	38025799	38026260	+	NA	NA	NA	inter
CUST_28065_PI429285431	0.0452319	2.69812	lncRNA	NONCODERv3	>n325331|NULL|mRNAlikelncRNA|Homosapiens|vegalncRNA|GENCODE|OTTHUMT00000325752|http://vega.sanger.ac.uk/Homo_sapiens/Transcript/Summary?db=core;t=OTTHUMT00000325752|-0.7881420|-0.2529532	chr2	42012262	42013030	-	NA	NA	NA	inter
CUST_29641_PI429285431	0.0127351	2.69801	lncRNA	NONCODERv3	>n333217|AF479408|mRNAlikelncRNA|Homosapiens|NULL|H-invitationalv7.5|HIT000080429|http://h-invitational.jp/hinv/spsoup/transcript_view?hit_id=HIT000080429|0.5806420|-0.1445589	chr1	9101900	9102216	-	SLC2A5	NA	chr1:9097005-9127604	inner
CUST_20870_PI429285431	0.0190744	2.69145	lncRNA	lncipedia2.1	>lnc-BMP2K-1:7	chr4	80229427	80229951	+	NAA11	NA	chr4:80238272-80239809	inter
CUST_37873_PI429285431	0.0490127	2.69063	lncRNA	NONCODERv3	>n346410|NULL|lincRNA|Homosapiens|HumanlincRNA|ScriptureReconstructionLincRNAsByLuo[unpublished]|linc_luo_1960|NULL|-1.5084800|-0.2385442	chr14	106049138	106052137	+	NA	NA	NA	inter
CUST_645_PI429285431	0.0422842	2.68983	lncRNA	gencode_v17	>transcript_id "ENST00000444079.1" | genecode_v17	chr2	558204	558965	+	NA	NA	NA	inter
CUST_28345_PI429285431	0.0492615	2.68532	lncRNA	NONCODERv3	>n325651|NULL|mRNAlikelncRNA|Homosapiens|vegalncRNA|GENCODE|OTTHUMT00000045470|http://vega.sanger.ac.uk/Homo_sapiens/Transcript/Summary?db=core;t=OTTHUMT00000045470|-1.0339000|-0.3168913	chr13	94149948	94151791	-	GPC6	NA	chr13:94139948-94163117	inner
CUST_17166_PI429285431	0.00378865	2.68517	lncRNA	lncipedia2.1	>lnc-CA7-3:2	chr16	66928898	66929278	+	PDP2	NA	chr16:66918898-66925004	inter
CUST_50277_PI429285431	0.0191672	2.68431	lncRNA	UCSC	>hg19_lincRNAsTranscripts_TCONS_l2_00028818 range=chr9:70654323-70662639 5'pad=0 3'pad=0 strand=+ repeatMasking=none	chr9	70654323	70654884	+	NA	NA	NA	inter
CUST_50552_PI429285431	0.0457485	2.684	lncRNA	UCSC	>hg19_lincRNAsTranscripts_TCONS_l2_00030922 range=chrY:7673545-7678258 5'pad=0 3'pad=0 strand=- repeatMasking=none	chrY	7673545	7674287	-	NA	NA	NA	inter
LNCA_21_P0003831	0.00110973	2.68317	lncRNA	Agilent_HUMAN_G3V2	XR_108545	chr4	44023387	44023446	+	NA	NA	NA	Unknown
LNCA_21_P0002192	0.044026	2.67529	lncRNA	Agilent_HUMAN_G3V2	TCONS_00003621	chr2	30572966	30582346	+	NA	NA	NA	Unknown
LNCA_21_P0006212	0.032423	2.6698	lncRNA	Agilent_HUMAN_G3V2	TCONS_00016132	chr9	116072102	116072669	+	NA	NA	NA	Unknown
LNCA_21_P0012266	0.0241927	2.66352	lncRNA	Agilent_HUMAN_G3V2	TCONS_l2_00017670	chr22	25905430	25905489	+	NA	NA	NA	Unknown
CUST_51554_PI429285431	3.4608e-05	2.66163	lncRNA	UCSC	>hg19_lincRNAsTranscripts_TCONS_l2_00011114 range=chr17:16721307-16725299 5'pad=0 3'pad=0 strand=- repeatMasking=none	chr17	16721307	16722507	-	NA	NA	NA	inter
CUST_17588_PI429285431	0.00513709	2.6576	lncRNA	lncipedia2.1	>lnc-IRF2BP2-3:1	chr1	234855127	234855383	-	NA	NA	NA	inter
LNCA_21_P0005348	0.0029362	2.65653	lncRNA	Agilent_HUMAN_G3V2	TCONS_00013292	chr7	564866	564925	+	NA	NA	NA	Unknown
LNCA_19_P00321478	0.0406976	2.65496	lncRNA	Agilent_HUMAN_G3V2	ENST00000415499	chr7	19970721	19970780	-	NA	NA	NA	Unknown
CUST_11632_PI429285431	0.00442082	2.64951	lncRNA	lncipedia2.1	>lnc-TRUB2-2:1	chr9	131214292	131214971	-	ODF2	NA	chr9:131206867-131224331	inter
CUST_27555_PI429285431	0.0192	2.64799	lncRNA	NONCODERv3	>n324746|NULL|mRNAlikelncRNA|Homosapiens|vegalncRNA|GENCODE|OTTHUMT00000319010|http://vega.sanger.ac.uk/Homo_sapiens/Transcript/Summary?db=core;t=OTTHUMT00000319010|1.0929300|-0.3373299	chr22	18706327	18709326	+	LOC642643	hg19_refFlat_PKP2:range=chr12:32945358-330496655'pad=0,hg19_refFlat_PKP2:range=chr12:32945358-330496655'pad=0 3'pad=0 strand=- repeatMasking=none,-81.40;hg19_refFlat_FBLIM1:range=chr1:16091479-161015265'pad=0,hg19_refFlat_FBLIM1:range=chr1:16091479-161015265'pad=0 3'pad=0 strand=+ repeatMasking=none,-71.20;hg19_refFlat_C16orf89:range=chr16:5094584-51159095'pad=0,hg19_refFlat_C16orf89:range=chr16:…	NA	inter
CUST_15440_PI429285431	0.0402962	2.6479	lncRNA	lncipedia2.1	>lnc-DCTD-6:1	chr4	182186098	182189097	-	NA	NA	NA	inter
CUST_34134_PI429285431	0.0439061	2.64338	lncRNA	NONCODERv3	>n340975|CR749855|mRNAlikelncRNA|Homosapiens|HumanlncRNA|JounralRNA|3441|NULL|-1.0484900|-0.3729633	chr11	13293303	13296302	-	ARNTL	NA	chr11:13299325-13308678	inter
CUST_12782_PI429285431	0.017021	2.64146	lncRNA	lncipedia2.1	>lnc-SOCS6-2:2	chr18	67874265	67874694	+	RTTN	NA	chr18:67864265-67872962	inter
CUST_38368_PI429285431	0.0126968	2.63956	lncRNA	NONCODERv3	>n382176|NULL|lncRNA|Homosapiens||UCSCGeneNoncode|uc001xji.1||-1.0841500|-0.4000981	chr14	67913800	67914648	-	NA	NA	NA	inter
LNCA_21_P0009209	0.00138736	2.6395	lncRNA	Agilent_HUMAN_G3V2	TCONS_00025268	chr17	1244124	1244183	+	NA	NA	NA	Unknown
CUST_29201_PI429285431	0.0242917	2.63897	lncRNA	NONCODERv3	>n326718|NULL|mRNAlikelncRNA|Homosapiens|vegalncRNA|GENCODE|OTTHUMT00000001545|http://vega.sanger.ac.uk/Homo_sapiens/Transcript/Summary?db=core;t=OTTHUMT00000001545|-1.0098700|-0.1512812	chr1	4531467	4532148	+	NA	hg19_refFlat_NEK4:range=chr3:52745793-528047625'pad=0,hg19_refFlat_NEK4:range=chr3:52745793-528047625'pad=0 3'pad=0 strand=- repeatMasking=none,-79.80;hg19_refFlat_IL12RB1:range=chr19:18182019-181976335'pad=0,hg19_refFlat_IL12RB1:range=chr19:18182019-181976335'pad=0 3'pad=0 strand=- repeatMasking=none,-78.60;hg19_refFlat_PDLIM5:range=chr4:95376440-953777095'pad=0,hg19_refFlat_PDLIM5:range=chr4:95…	NA	inter
CUST_37470_PI429285431	0.00149586	2.63861	lncRNA	NONCODERv3	>n345926|NULL|lincRNA|Homosapiens|HumanlincRNA|ScriptureReconstructionLincRNAsByLuo[unpublished]|linc_luo_1475|NULL|-1.6646900|-0.2685406	chr5	159895252	159897841	+	NA	NA	NA	inter
CUST_49332_PI429285431	0.0117376	2.63612	lncRNA	UCSC	>hg19_lincRNAsTranscripts_TCONS_l2_00022346 range=chr5:67089000-67101085 5'pad=0 3'pad=0 strand=+ repeatMasking=none	chr5	67089000	67089732	+	NA	NA	NA	inter
CUST_50917_PI429285431	0.03509	2.63535	lncRNA	UCSC	>hg19_lincRNAsTranscripts_TCONS_l2_00006127 range=chr12:9554190-9559064 5'pad=0 3'pad=0 strand=- repeatMasking=none	chr12	9554190	9554743	-	LOC728715	NA	chr12:9549658-9555094	inter
CUST_48186_PI429285431	0.0201677	2.63314	lncRNA	ncbi	>gi|310118091|ref|XR_113300.1| PREDICTED: Homo sapiens uncharacterized LOC100506610 (LOC100506610), misc_RNA	NA	NA	NA	NA	NA	NA	NA	Unknown
CUST_34020_PI429285431	0.0329079	2.62575	lncRNA	NONCODERv3	>n340837|AK094291|mRNAlikelncRNA|Homosapiens|HumanlncRNA|JounralRNA|3301|NULL|0.0884155|-0.1692575	chr17	73126977	73129137	+	HN1	hg19_refFlat_WDR27:range=chr6:169857687-1700891015'pad=0,hg19_refFlat_WDR27:range=chr6:169857687-1700891015'pad=0 3'pad=0 strand=- repeatMasking=none,-79.90;hg19_refFlat_ISY1:range=chr3:128848924-1288798185'pad=0,hg19_refFlat_ISY1:range=chr3:128848924-1288798185'pad=0 3'pad=0 strand=- repeatMasking=none,-80.90;hg19_refFlat_TRIM5:range=chr11:5685318-57014075'pad=0,hg19_refFlat_TRIM5:range=chr11:56…	NA	inner
CUST_6653_PI429285431	0.0273543	2.62395	lncRNA	gencode_v17	>transcript_id "ENST00000412241.1" | genecode_v17	chr20	18304299	18304753	-	ZNF133	NA	chr20:18294299-18297640	inter
CUST_6141_PI429285431	0.0107687	2.62243	lncRNA	gencode_v17	>transcript_id "ENST00000583089.1" | genecode_v17	chr18	28293241	28293812	+	NA	NA	NA	inter
LNCA_21_P0007554	0.0304395	2.62102	lncRNA	Agilent_HUMAN_G3V2	TCONS_00020412	chr12	49184290	49184349	+	NA	NA	NA	Unknown
CUST_50971_PI429285431	0.0440984	2.61917	lncRNA	UCSC	>hg19_lincRNAsTranscripts_TCONS_l2_00005793 range=chr12:80818224-80819003 5'pad=0 3'pad=0 strand=+ repeatMasking=none	chr12	80818224	80818569	+	NA	NA	NA	inter
LNCA_21_P0012576	0.00837407	2.61851	lncRNA	Agilent_HUMAN_G3V2	THC2648740	chr4	23042578	23042637	+	NA	NA	NA	Unknown
CUST_1877_PI429285431	0.0419839	2.61751	lncRNA	gencode_v17	>transcript_id "ENST00000509671.1" | genecode_v17	chr4	128322881	128323121	-	NA	NA	NA	inter
CUST_36778_PI429285431	0.000900307	2.61547	lncRNA	NONCODERv3	>n345257|NULL|lincRNA|Homosapiens|HumanlincRNA|ScriptureReconstructionLincRNAsByLuo[unpublished]|linc_luo_806|NULL|-1.4067500|-0.3336836	chr14	51731450	51732262	-	TMX1	NA	chr14:51721450-51724373	inter
CUST_21707_PI429285431	0.0213206	2.61448	lncRNA	lncipedia2.1	>lnc-TRIM44-2:1	chr11	35835882	35838881	+	TRIM44	NA	chr11:35825882-35830930	inter
LNCA_21_P0006852	0.0151359	2.61428	lncRNA	Agilent_HUMAN_G3V2	TCONS_00018153	chr10	31428164	31429302	+	NA	NA	NA	Unknown
CUST_33223_PI429285431	0.0371305	2.60881	lncRNA	NONCODERv3	>n339922|BC019842|mRNAlikelncRNA|Homosapiens|HumanlncRNA|JounralRNA|2371|NULL|-1.0949000|-0.2463766	chr18	71589173	71589897	-	NA	NA	NA	inter
CUST_49627_PI429285431	0.0217773	2.60861	lncRNA	UCSC	>hg19_lincRNAsTranscripts_TCONS_l2_00025689 range=chr7:17029683-17060647 5'pad=0 3'pad=0 strand=+ repeatMasking=none	chr7	17029683	17030807	+	NA	hg19_refFlat_ZNF700:range=chr19:12037391-120610685'pad=0,hg19_refFlat_ZNF700:range=chr19:12037391-120610685'pad=0 3'pad=0 strand=+ repeatMasking=none,-65.90;hg19_refFlat_FAM76A:range=chr1:28052592-280870925'pad=0,hg19_refFlat_FAM76A:range=chr1:28052592-280870925'pad=0 3'pad=0 strand=+ repeatMasking=none,-20.00;hg19_refFlat_MAP4K1:range=chr19:39078450-391085355'pad=0,hg19_refFlat_MAP4K1:range=chr1…	NA	inter
LNCA_19_P00317547	0.0231761	2.60801	lncRNA	Agilent_HUMAN_G3V2	XR_110179	chr6	138144929	138144988	-	NA	NA	NA	Unknown
LNCA_21_P0005532	0.0155739	2.60723	lncRNA	Agilent_HUMAN_G3V2	TCONS_00013978	chr7	134944930	134944989	-	NA	NA	NA	Unknown
CUST_9889_PI429285431	0.0425945	2.60304	lncRNA	lncipedia2.1	>lnc-GRXCR1-4:1	chr4	43342836	43343092	+	NA	NA	NA	inter
CUST_34804_PI429285431	0.0435067	2.60053	lncRNA	NONCODERv3	>n341711|BX647080|mRNAlikelncRNA|Homosapiens|HumanlncRNA|JounralRNA|4183|NULL|-1.0089700|-0.3213459	chr9	85882089	85885088	+	FRMD3	hg19_refFlat_MRPL10:range=chr17:45901571-459065865'pad=0,hg19_refFlat_MRPL10:range=chr17:45901571-459065865'pad=0 3'pad=0 strand=- repeatMasking=none,-76.00;hg19_refFlat_RQCD1:range=chr2:219433678-2194589995'pad=0,hg19_refFlat_RQCD1:range=chr2:219433678-2194589995'pad=0 3'pad=0 strand=+ repeatMasking=none,-44.50;hg19_refFlat_STAP2:range=chr19:4324130-43387505'pad=0,hg19_refFlat_STAP2:range=chr19:…	NA	inner
LNCA_21_P0002606	0.00271134	2.59761	lncRNA	Agilent_HUMAN_G3V2	TCONS_00004875	chr2	114265783	114265842	+	NA	NA	NA	Unknown
CUST_50687_PI429285431	0.0466971	2.59353	lncRNA	UCSC	>hg19_lincRNAsTranscripts_TCONS_l2_00003048 range=chr10:48320921-48326093 5'pad=0 3'pad=0 strand=+ repeatMasking=none	chr10	48323921	48324795	+	NA	NA	NA	inter
LNCA_21_P0000963	0.0327265	2.59071	lncRNA	Agilent_HUMAN_G3V2	ENST00000420354	chr1	30893773	30893832	+	NA	NA	NA	Unknown
CUST_18982_PI429285431	0.0100527	2.59017	lncRNA	lncipedia2.1	>lnc-FBXO25-5:10	chr8	1212415	1212810	+	NA	NA	NA	inter
LNCA_21_P0012073	0.0124647	2.58732	lncRNA	Agilent_HUMAN_G3V2	ENST00000434790	chr2	89117789	89117848	-	NA	NA	NA	Unknown
CUST_28733_PI429285431	0.0488941	2.58707	lncRNA	NONCODERv3	>n326126|NULL|mRNAlikelncRNA|Homosapiens|vegalncRNA|GENCODE|OTTHUMT00000046434|http://vega.sanger.ac.uk/Homo_sapiens/Transcript/Summary?db=core;t=OTTHUMT00000046434|-1.0411400|-0.4133792	chr10	2104038	2104469	+	NA	NA	NA	inter
CUST_28799_PI429285431	0.00323003	2.58636	lncRNA	NONCODERv3	>n326206|NULL|mRNAlikelncRNA|Homosapiens|vegalncRNA|GENCODE|OTTHUMT00000092591|http://vega.sanger.ac.uk/Homo_sapiens/Transcript/Summary?db=core;t=OTTHUMT00000092591|-1.1465200|-0.3883226	chr1	221421108	221421594	+	NA	NA	NA	inter
CUST_42038_PI429285431	0.0317256	2.58555	lncRNA	ensembl.GRCh37.72	>ENST00000582846 ncrna:miRNA chromosome:GRCh37:17:40666206:40666325:1 gene:ENSG00000265611 gene_biotype:miRNA transcript_biotype:miRNA	chr17	40666206	40666325	+	ATP6V0A1	NA	chr17:40656206-40674597	inner
CUST_51535_PI429285431	0.0479566	2.58385	lncRNA	UCSC	>hg19_lincRNAsTranscripts_TCONS_l2_00011353 range=chr17:53588361-53609981 5'pad=0 3'pad=0 strand=- repeatMasking=none	chr17	53588361	53589285	-	NA	NA	NA	inter
CUST_30030_PI429285431	0.00340162	2.58248	lncRNA	NONCODERv3	>n334500|U30271|mRNAlikelncRNA|Homosapiens|NULL|H-invitationalv7.5|HIT000219027|http://h-invitational.jp/hinv/spsoup/transcript_view?hit_id=HIT000219027|-1.1507300|-0.1665813	chr14	96722559	96722767	+	BDKRB1	NA	chr14:96722559-96731100	inner
LNCA_21_P0013792	0.000860277	2.57987	lncRNA	Agilent_HUMAN_G3V2	THC2665466	chrX	134561661	134561720	+	NA	NA	NA	Unknown
CUST_8035_PI429285431	0.00367189	2.57956	lncRNA	lncipedia2.1	>lnc-ITGAL-1:1	chr16	30541404	30543354	+	ITGAL	hg19_refFlat_TCF4:range=chr18:52895456-533031285'pad=0,hg19_refFlat_TCF4:range=chr18:52895456-533031285'pad=0 3'pad=0 strand=- repeatMasking=none,-78.50chr16:30531404-30534506	NA	inter
LNCA_21_P0002019	0.00240881	2.57737	lncRNA	Agilent_HUMAN_G3V2	ENST00000431117	chr2	15808900	15808959	-	NA	NA	NA	Unknown
LNCA_21_P0005948	0.0476589	2.57689	lncRNA	Agilent_HUMAN_G3V2	TCONS_00015349	chr8	125955072	125955131	+	NA	NA	NA	Unknown
LNCA_21_P0014518	0.012174	2.57673	lncRNA	Agilent_HUMAN_G3V2	XR_110188	chr6	150146019	150146078	-	NA	NA	NA	Unknown
CUST_18855_PI429285431	0.0349753	2.57402	lncRNA	lncipedia2.1	>lnc-REXO1L2P-1:1	chr8	86804313	86807312	+	LOC100288562	hg19_refFlat_REXO1L1:range=chr8:86787279-867893065'pad=0,hg19_refFlat_REXO1L1:range=chr8:86787279-867893065'pad=0 3'pad=0 strand=- repeatMasking=none,-105.00;hg19_refFlat_REXO1L1:range=chr8:86573699-865757265'pad=0,hg19_refFlat_REXO1L1:range=chr8:86573699-865757265'pad=0 3'pad=0 strand=- repeatMasking=none,-105.00chr8:86802465-86804650	NA	inter
LNCA_21_P0009396	0.00888083	2.57374	lncRNA	Agilent_HUMAN_G3V2	TCONS_00025982	chr17	75254724	75254783	+	NA	NA	NA	Unknown
LNCA_19_P00319064	0.0230984	2.57297	lncRNA	Agilent_HUMAN_G3V2	ENST00000417213	chr2	38365996	38366055	-	NA	NA	NA	Unknown
CUST_17451_PI429285431	0.032423	2.57238	lncRNA	lncipedia2.1	>lnc-EGLN1-1:2	chr1	231664166	231664630	-	TSNAX	NA	chr1:231664399-231674302	inter
CUST_9514_PI429285431	0.0262457	2.57116	lncRNA	lncipedia2.1	>lnc-USP16-7:1	chr21	29047027	29047611	+	NA	NA	NA	inter
CUST_674_PI429285431	0.0296126	2.57098	lncRNA	gencode_v17	>transcript_id "ENST00000450397.1" | genecode_v17	chr2	5950773	5951183	-	NA	NA	NA	inter
CUST_2374_PI429285431	0.0401737	2.57079	lncRNA	gencode_v17	>transcript_id "ENST00000602301.1" | genecode_v17	chr5	135416160	135416286	-	NA	NA	NA	inter
CUST_17612_PI429285431	0.0469013	2.56994	lncRNA	lncipedia2.1	>lnc-SRBD1-4:2	chr2	45550110	45550830	-	NA	NA	NA	inter
CUST_52103_PI429285431	0.00113387	2.56919	lncRNA	UCSC	>hg19_lincRNAsTranscripts_TCONS_l2_00017568 range=chr22:17525527-17541777 5'pad=0 3'pad=0 strand=+ repeatMasking=none	chr22	17525527	17526286	+	NA	NA	NA	inter
CUST_11285_PI429285431	0.0313137	2.56904	lncRNA	lncipedia2.1	>lnc-SRP9-1:3	chr1	225903748	225904456	+	NA	NA	NA	inter
CUST_345_PI429201921	0.0407475	2.56884	lncRNA	Affy_HUMAN_HTA2.0	linc-SMYD3	chr1	246679340	246687589	-	SSBP3	NA	chr1:54871929-54872092	Unknown
CUST_8584_PI429285431	0.0394342	2.56685	lncRNA	lncipedia2.1	>lnc-AC003682.1-2:1	chr19	58073476	58076475	-	ZNF550	hg19_refFlat_ISY1:range=chr3:128848924-1288798185'pad=0,hg19_refFlat_ISY1:range=chr3:128848924-1288798185'pad=0 3'pad=0 strand=- repeatMasking=none,-82.30;hg19_refFlat_ZNF493:range=chr19:21580040-215903305'pad=0,hg19_refFlat_ZNF493:range=chr19:21580040-215903305'pad=0 3'pad=0 strand=+ repeatMasking=none,-74.80;hg19_refFlat_ZNF429:range=chr19:21688574-217208805'pad=0,hg19_refFlat_ZNF429:range=chr1…	NA	inter
CUST_3302_PI429285431	0.038714	2.56543	lncRNA	gencode_v17	>transcript_id "ENST00000519123.1" | genecode_v17	chr8	127530943	127531371	+	NA	NA	NA	inter
LNCA_21_P0006532	0.0209986	2.56457	lncRNA	Agilent_HUMAN_G3V2	TCONS_00017313	chrX	45629149	45629208	-	NA	NA	NA	Unknown
CUST_41855_PI429285431	0.00799565	2.56208	lncRNA	ensembl.GRCh37.72	>ENST00000384972 ncrna:miRNA chromosome:GRCh37:7:127847924:127847996:1 gene:ENSG00000207705 gene_biotype:miRNA transcript_biotype:miRNA	chr7	127847924	127847996	+	NA	NA	NA	inter
CUST_11784_PI429285431	0.0420701	2.55983	lncRNA	lncipedia2.1	>lnc-RLN2-1:1	chr9	5310932	5311214	-	RLN2	NA	chr9:5300932-5304580	inter
CUST_39574_PI429285431	0.0153892	2.55741	lncRNA	NONCODERv3	>n387546|NULL|lncRNA|Homosapiens||UCSCGeneNoncode|uc011hjx.1||-0.4863090|-0.3469563	chr6	1164362	1164970	+	NA	hg19_refFlat_CSF2RA:range=chrX:1401597-14283725'pad=0,hg19_refFlat_CSF2RA:range=chrX:1401597-14283725'pad=0 3'pad=0 strand=+ repeatMasking=none,-74.80;hg19_refFlat_ZMAT1:range=chrX:101138482-1011736065'pad=0,hg19_refFlat_ZMAT1:range=chrX:101138482-1011736065'pad=0 3'pad=0 strand=- repeatMasking=none,-83.00;hg19_refFlat_USP4:range=chr3:49349800-493774575'pad=0,hg19_refFlat_USP4:range=chr3:49349800…	NA	inter
CUST_34624_PI429285431	0.00803292	2.55264	lncRNA	NONCODERv3	>n341516|BC040302|mRNAlikelncRNA|Homosapiens|HumanlncRNA|JounralRNA|3986|NULL|-1.1417200|-0.3581235	chr8	64378406	64381405	+	NA	hg19_refFlat_CASP7:range=chr10:115457253-1154891835'pad=0,hg19_refFlat_CASP7:range=chr10:115457253-1154891835'pad=0 3'pad=0 strand=+ repeatMasking=none,-83.00;hg19_refFlat_MAD2L1BP:range=chr6:43597487-436082705'pad=0,hg19_refFlat_MAD2L1BP:range=chr6:43597487-436082705'pad=0 3'pad=0 strand=+ repeatMasking=none,-73.70;hg19_refFlat_MLLT10:range=chr10:21823574-218456065'pad=0,hg19_refFlat_MLLT10:rang…	NA	inter
CUST_35435_PI429285431	0.0345868	2.55049	lncRNA	NONCODERv3	>n342498|D83542|mRNAlikelncRNA|Homosapiens|HumanlncRNA|JounralRNA|4992|NULL|10.9549000|-0.0891584	chr16	89238162	89240994	+	CDH15	NA	chr16:89238163-89261900	inner
CUST_27624_PI429285431	0.00898062	2.54735	lncRNA	NONCODERv3	>n324828|NULL|mRNAlikelncRNA|Homosapiens|vegalncRNA|GENCODE|OTTHUMT00000171733|http://vega.sanger.ac.uk/Homo_sapiens/Transcript/Summary?db=core;t=OTTHUMT00000171733|-1.2521200|-0.3191036	chr21	28738740	28739422	-	NA	NA	NA	inter
LNCA_21_P0006021	0.00824379	2.54373	lncRNA	Agilent_HUMAN_G3V2	TCONS_00015699	chr9	84370017	84370076	+	NA	NA	NA	Unknown
CUST_5204_PI429285431	0.0325798	2.54314	lncRNA	gencode_v17	>transcript_id "ENST00000568092.1" | genecode_v17	chr15	62570054	62570564	+	NA	NA	NA	inter
CUST_23947_PI429285431	0.000740424	2.54253	lncRNA	lncipedia2.1	>lnc-RHOBTB2-2:2	chr8	22745189	22748188	+	PEBP4	NA	chr8:22735189-22755535	inner
LNCA_21_P0014079	0.00991913	2.54241	lncRNA	Agilent_HUMAN_G3V2	ENST00000476966	chr1	156381797	156381856	-	NA	NA	NA	Unknown
CUST_37041_PI429285431	0.001536	2.54045	lncRNA	NONCODERv3	>n345496|NULL|lincRNA|Homosapiens|HumanlincRNA|ScriptureReconstructionLincRNAsByLuo[unpublished]|linc_luo_1045|NULL|-1.2909300|-0.2181556	chr2	27928652	27931373	+	MRPL33	hg19_refFlat_SEPP1:range=chr5:42800822-428108695'pad=0,hg19_refFlat_SEPP1:range=chr5:42800822-428108695'pad=0 3'pad=0 strand=- repeatMasking=none,-85.40;hg19_refFlat_TCF4:range=chr18:52895456-533031285'pad=0,hg19_refFlat_TCF4:range=chr18:52895456-533031285'pad=0 3'pad=0 strand=- repeatMasking=none,-87.30;hg19_refFlat_KIF13A:range=chr6:17951594-179876945'pad=0,hg19_refFlat_KIF13A:range=chr6:179515…	NA	inter
LNCA_21_P0008222	0.0443534	2.53991	lncRNA	Agilent_HUMAN_G3V2	BC034786	chr13	112925808	112925867	-	NA	NA	NA	Unknown
CUST_27596_PI429285431	0.00460084	2.53982	lncRNA	NONCODERv3	>n324799|NULL|mRNAlikelncRNA|Homosapiens|vegalncRNA|GENCODE|OTTHUMT00000194629|http://vega.sanger.ac.uk/Homo_sapiens/Transcript/Summary?db=core;t=OTTHUMT00000194629|-1.2717200|-0.3794266	chr21	36377026	36377373	+	RUNX1	NA	chr21:36367026-36394582	inner
CUST_44394_PI429285431	0.032722	2.53475	lncRNA	ncbi	>gi|334085192|ref|NR_038304.1| Homo sapiens uncharacterized LOC100505702 (LOC100505702), transcript variant 2, non-coding RNA	Chr4	79570148	79571375	+	NA	hg19_refFlat_ZNF700:range=chr19:12037391-120610685'pad=0,hg19_refFlat_ZNF700:range=chr19:12037391-120610685'pad=0 3'pad=0 strand=+ repeatMasking=none,-74.20;hg19_refFlat_MYL10:range=chr7:101256755-1012723985'pad=0,hg19_refFlat_MYL10:range=chr7:101256755-1012723985'pad=0 3'pad=0 strand=- repeatMasking=none,-78.80;hg19_refFlat_NPC1L1:range=chr7:44553046-445808585'pad=0,hg19_refFlat_NPC1L1:range=chr…	NA	inter
LNCA_21_P0006382	0.0181454	2.53384	lncRNA	Agilent_HUMAN_G3V2	TCONS_00016822	chr9	87653289	87653348	-	NA	NA	NA	Unknown
LNCA_21_P0007467	0.00368782	2.52974	lncRNA	Agilent_HUMAN_G3V2	TCONS_00019744	chr11	103713691	103714445	-	NA	NA	NA	Unknown
CUST_5100_PI429285431	0.0349212	2.52851	lncRNA	gencode_v17	>transcript_id "ENST00000568541.1" | genecode_v17	chr15	24451931	24452486	+	NA	NA	NA	inter
CUST_36997_PI429285431	0.00231426	2.52082	lncRNA	NONCODERv3	>n345455|NULL|lincRNA|Homosapiens|HumanlincRNA|ScriptureReconstructionLincRNAsByLuo[unpublished]|linc_luo_1004|NULL|-1.2821400|-0.2723123	chr1	113503102	113504911	+	SLC16A1	hg19_refFlat_BRD2:range=chr6_cox_hap2:4385214-43930395'pad=0,hg19_refFlat_BRD2:range=chr6_cox_hap2:4385214-43930395'pad=0 3'pad=0 strand=+ repeatMasking=none,-83.10;hg19_refFlat_MLLT10:range=chr10:21823574-218456065'pad=0,hg19_refFlat_MLLT10:range=chr10:21823574-218456065'pad=0 3'pad=0 strand=+ repeatMasking=none,-74.40;hg19_refFlat_KCNRG:range=chr13:50589630-505943635'pad=0,hg19_refFlat_KCNRG:ra…	NA	inter
CUST_9538_PI429285431	0.0428177	2.51182	lncRNA	lncipedia2.1	>lnc-EGLN1-1:6	chr1	231663868	231664297	-	TSNAX	NA	chr1:231664399-231674042	inter
CUST_41299_PI429285431	0.00673674	2.50682	lncRNA	ensembl.GRCh37.72	>ENST00000390184 ncrna:miRNA chromosome:GRCh37:7:88269835:88269941:1 gene:ENSG00000211518 gene_biotype:miRNA transcript_biotype:miRNA	chr7	88269835	88269941	+	NA	NA	NA	inter
LNCA_21_P0009768	0.0389864	2.50582	lncRNA	Agilent_HUMAN_G3V2	TCONS_00027368	chr19	44405107	44405166	-	NA	NA	NA	Unknown
CUST_21417_PI429285431	0.00313806	2.50575	lncRNA	lncipedia2.1	>lnc-TMEM86A-1:1	chr11	18761971	18762844	+	PTPN5	hg19_refFlat_IGSF22:range=chr11:18726015-187457835'pad=0,hg19_refFlat_IGSF22:range=chr11:18726015-187457835'pad=0 3'pad=0 strand=- repeatMasking=none,-93.50chr11:18751971-18772115	NA	inner
CUST_25359_PI429285431	0.00826802	2.50534	lncRNA	lncipedia2.1	>lnc-MRPS6-2:2	chr21	35697036	35697840	+	NA	NA	NA	inter
CUST_30489_PI429285431	0.00594431	2.50194	lncRNA	NONCODERv3	>n335643|CR607939|mRNAlikelncRNA|Homosapiens|NULL|H-invitationalv7.5|HIT000287134|http://h-invitational.jp/hinv/spsoup/transcript_view?hit_id=HIT000287134|-0.5919460|-0.2304179	chr9	38406578	38407092	+	IGFBPL1	NA	chr9:38408991-38417093	inter
CUST_36901_PI429285431	0.0394501	2.50171	lncRNA	NONCODERv3	>n345373|NULL|lincRNA|Homosapiens|HumanlincRNA|ScriptureReconstructionLincRNAsByLuo[unpublished]|linc_luo_922|NULL|-1.3352000|-0.3153113	chr19	20970252	20972463	+	NA	hg19_refFlat_FAM122C:range=chrX:133941629-1339434035'pad=0,hg19_refFlat_FAM122C:range=chrX:133941629-1339434035'pad=0 3'pad=0 strand=+ repeatMasking=none,-82.10;hg19_refFlat_ZNF573:range=chr19:38229393-382492365'pad=0,hg19_refFlat_ZNF573:range=chr19:38229393-382492365'pad=0 3'pad=0 strand=- repeatMasking=none,-78.90;hg19_refFlat_LYRM4:range=chr6:5187029-52609665'pad=0,hg19_refFlat_LYRM4:range=chr…	NA	inter
CUST_40823_PI429285431	0.0326042	2.49933	lncRNA	NONCODERv3	>n410592|NR_037852_4|lncRNA|Homosapiens||RefGeneNoncode|NR_037852_4||1.4960400|-0.3178016	chr6	2828800	2830738	-	SERPINB1	hg19_refFlat_CHFR:range=chr12:133418140-1334639145'pad=0,hg19_refFlat_CHFR:range=chr12:133418140-1334639145'pad=0 3'pad=0 strand=- repeatMasking=none,-40.90;hg19_refFlat_STAP2:range=chr19:4324130-43387505'pad=0,hg19_refFlat_STAP2:range=chr19:4324130-43387505'pad=0 3'pad=0 strand=- repeatMasking=none,-71.70;hg19_refFlat_MICAL3:range=chr22:18317216-183895785'pad=0,hg19_refFlat_MICAL3:range=chr22:18…	NA	inter
LNCA_21_P0014898	0.0246774	2.49909	lncRNA	Agilent_HUMAN_G3V2	XR_132888	chr8	29940900	29940959	+	NA	NA	NA	Unknown
CUST_3000_PI429285431	0.0445225	2.49789	lncRNA	gencode_v17	>transcript_id "ENST00000518619.1" | genecode_v17	chr8	9183618	9184424	+	NA	NA	NA	inter
CUST_52105_PI429285431	0.00288557	2.4966	lncRNA	UCSC	>hg19_lincRNAsTranscripts_TCONS_l2_00017580 range=chr22:18724069-18732234 5'pad=0 3'pad=0 strand=+ repeatMasking=none	chr22	18724069	18724395	+	LOC642643	NA	chr22:18714069-18737841	inter
CUST_384_PI429201921	0.0345992	2.49394	lncRNA	Affy_HUMAN_HTA2.0	linc-MPPED1-1	chr22	43796336	43805687	+	NA	NA	NA	Unknown
CUST_44811_PI429285431	0.0424264	2.49251	lncRNA	ncbi	>gi|301129258|ref|NR_034174.1| Homo sapiens vanin 2 (VNN2), transcript variant 4, non-coding RNA	NA	NA	NA	NA	NA	NA	NA	Unknown
CUST_25758_PI429285431	0.03	2.49225	lncRNA	lncipedia2.1	>lnc-CKB-1:1	chr14	103991347	103994346	-	TRMT61A	NA	chr14:103995509-104003410	inter
CUST_37205_PI429285431	0.0447871	2.4914	lncRNA	NONCODERv3	>n345639|NULL|lincRNA|Homosapiens|HumanlincRNA|ScriptureReconstructionLincRNAsByLuo[unpublished]|linc_luo_1188|NULL|-1.2886600|-0.4281916	chr4	74569814	74570860	-	NA	NA	NA	inter
CUST_29560_PI429285431	0.0248305	2.48861	lncRNA	NONCODERv3	>n333052|AF234892|mRNAlikelncRNA|Homosapiens|NULL|H-invitationalv7.5|HIT000074717|http://h-invitational.jp/hinv/spsoup/transcript_view?hit_id=HIT000074717|3.5250300|-1.0000000	chr19	54466370	54467004	+	CACNG8	NA	chr19:54466290-54493469	inner
CUST_47356_PI429285431	0.00597825	2.48753	lncRNA	ncbi	>gi|197116379|ref|NR_024090.1| Homo sapiens long intergenic non-protein coding RNA 320 (LINC00320), non-coding RNA	Chr21	22114913	22116926	-	NA	NA	NA	inter
CUST_17525_PI429285431	0.0267452	2.48648	lncRNA	lncipedia2.1	>lnc-OR4M2-7:1	chr15	20529998	20530522	+	NA	NA	NA	inter
CUST_44812_PI429285431	0.044467	2.48639	lncRNA	ncbi	>gi|301129257|ref|NR_034173.1| Homo sapiens vanin 2 (VNN2), transcript variant 3, non-coding RNA	NA	NA	NA	NA	NA	NA	NA	Unknown
CUST_31935_PI429285431	0.00624374	2.48622	lncRNA	NONCODERv3	>n338491|AK097788|mRNAlikelncRNA|Homosapiens|HumanlncRNA|JounralRNA|888|NULL|1.4403200|-0.1436642	chr1	205782468	205784369	+	LOC100131354	NA	chr1:205781868-205784368	inter
CUST_51108_PI429285431	0.00985314	2.48597	lncRNA	UCSC	>hg19_lincRNAsTranscripts_TCONS_l2_00007295 range=chr13:97591376-97601835 5'pad=0 3'pad=0 strand=- repeatMasking=none	chr13	97591376	97594375	-	OXGR1	hg19_refFlat_TCF4:range=chr18:52895456-533031285'pad=0,hg19_refFlat_TCF4:range=chr18:52895456-533031285'pad=0 3'pad=0 strand=- repeatMasking=none,-79.70;hg19_refFlat_FBLIM1:range=chr1:16091479-161015265'pad=0,hg19_refFlat_FBLIM1:range=chr1:16091479-161015265'pad=0 3'pad=0 strand=+ repeatMasking=none,-81.80;hg19_refFlat_PKP2:range=chr12:32945358-330496655'pad=0,hg19_refFlat_PKP2:range=chr12:329453…	NA	inter
CUST_3245_PI429285431	0.0355997	2.48585	lncRNA	gencode_v17	>transcript_id "ENST00000523870.1" | genecode_v17	chr8	101393702	101394193	-	NA	NA	NA	inter
CUST_24238_PI429285431	0.0015727	2.48465	lncRNA	lncipedia2.1	>lnc-AC114546.1-2:1	chr15	35302946	35303413	+	NA	NA	NA	inter
CUST_10838_PI429285431	0.0151518	2.47901	lncRNA	lncipedia2.1	>lnc-UGGT2-1:1	chr13	96739249	96739502	-	HS6ST3	NA	chr13:96743093-96749285	inter
LNCA_33_P3400319	0.0107123	2.47736	lncRNA	Agilent_HUMAN_G3V2	ENST00000383686	chr3	110612235	110612294	-	NA	NA	NA	Unknown
LNCA_21_P0010341	0.0317277	2.47373	lncRNA	Agilent_HUMAN_G3V2	ENST00000452326	chr22	19654675	19654980	+	NA	NA	NA	Unknown
LNCA_21_P0002153	0.00482681	2.47316	lncRNA	Agilent_HUMAN_G3V2	TCONS_00003529	chr2	470708	470767	+	NA	NA	NA	Unknown
CUST_10408_PI429285431	0.0499389	2.46878	lncRNA	lncipedia2.1	>lnc-TGFBRAP1-6:9	chr2	105461519	105462164	-	NA	NA	NA	inter
LNCA_21_P0011762	0.00271559	2.46584	lncRNA	Agilent_HUMAN_G3V2	TCONS_l2_00013223	chr19	54109740	54109799	-	NA	NA	NA	Unknown
CUST_2105_PI429285431	0.0352207	2.46537	lncRNA	gencode_v17	>transcript_id "ENST00000513573.1" | genecode_v17	chr5	20305674	20306097	+	LOC100506187	NA	chr5:20302313-20331624	inter
CUST_33986_PI429285431	0.00857066	2.45943	lncRNA	NONCODERv3	>n340799|BC073826|mRNAlikelncRNA|Homosapiens|HumanlncRNA|JounralRNA|3262|NULL|-0.8084670|-0.0962282	chr6	1384026	1385320	-	FOXF2	NA	chr6:1390069-1395301	inter
CUST_30933_PI429285431	0.00290921	2.45752	lncRNA	NONCODERv3	>n336999|DQ004397|mRNAlikelncRNA|Homosapiens|NULL|H-invitationalv7.5|HIT000340909|http://h-invitational.jp/hinv/spsoup/transcript_view?hit_id=HIT000340909|0.6788750|-0.1012906	chr2	121493823	121494134	+	GLI2	NA	chr2:121554867-121695034	inner
CUST_26729_PI429285431	0.0410973	2.4569	lncRNA	NONCODERv3	>n5181|U56440|His-1RNA|Homosapiens|His-1|NONCODEv2.0|n5181|NULL|-1.5906100|-0.3761680	chr2	145456943	145459942	+	NA	hg19_refFlat_C14orf178:range=chr14:78227386-782360215'pad=0,hg19_refFlat_C14orf178:range=chr14:78227386-782360215'pad=0 3'pad=0 strand=+ repeatMasking=none,-75.50;hg19_refFlat_BTG3:range=chr21:18966411-189814625'pad=0,hg19_refFlat_BTG3:range=chr21:18966411-189814625'pad=0 3'pad=0 strand=- repeatMasking=none,-76.70;hg19_refFlat_NOP2:range=chr12:6667194-66770845'pad=0,hg19_refFlat_NOP2:range=chr12:…	NA	inter
LNCA_21_P0009973	0.0268451	2.45619	lncRNA	Agilent_HUMAN_G3V2	TCONS_00028216	chr20	49012801	49012860	+	NA	NA	NA	Unknown
CUST_37991_PI429285431	0.0432673	2.45373	lncRNA	NONCODERv3	>n346546|NULL|lincRNA|Homosapiens|HumanlincRNA|ScriptureReconstructionLincRNAsByLuo[unpublished]|linc_luo_2096|NULL|-1.3188300|-0.0334792	chr8	145168557	145169482	+	MAF1	NA	chr8:145159305-145162515	inter
CUST_28837_PI429285431	0.0375842	2.45262	lncRNA	NONCODERv3	>n326251|NULL|mRNAlikelncRNA|Homosapiens|vegalncRNA|GENCODE|OTTHUMT00000090163|http://vega.sanger.ac.uk/Homo_sapiens/Transcript/Summary?db=core;t=OTTHUMT00000090163|-1.0657000|-0.2998799	chr1	209926486	209926946	+	TRAF3IP3	NA	chr1:209917720-209940068	inner
CUST_45555_PI429285431	0.025795	2.45244	lncRNA	ncbi	>gi|310120469|ref|XR_109024.1| PREDICTED: Homo sapiens uncharacterized LOC100505601 (LOC100505601), misc_RNA	NA	NA	NA	NA	NA	NA	NA	Unknown
CUST_29160_PI429285431	0.0166758	2.44941	lncRNA	NONCODERv3	>n326671|NULL|mRNAlikelncRNA|Homosapiens|vegalncRNA|GENCODE|OTTHUMT00000009331|http://vega.sanger.ac.uk/Homo_sapiens/Transcript/Summary?db=core;t=OTTHUMT00000009331|-0.8118470|-0.3026695	chr1	25309535	25310148	-	NA	NA	NA	inter
CUST_36508_PI429285431	0.0200149	2.44471	lncRNA	NONCODERv3	>n345008|NULL|lincRNA|Homosapiens|HumanlincRNA|ScriptureReconstructionLincRNAsByLuo[unpublished]|linc_luo_557|NULL|-1.3046800|-0.3832747	chr8	91323727	91324641	-	NA	NA	NA	inter
CUST_10309_PI429285431	0.0481564	2.44465	lncRNA	lncipedia2.1	>lnc-FRAT1-1:2	chr10	99097832	99098969	+	FRAT2	NA	chr10:99092254-99094458	inter
LNCA_21_P0003342	0.0047178	2.44316	lncRNA	Agilent_HUMAN_G3V2	ENST00000506514	chr4	23784121	23784180	+	NA	NA	NA	Unknown
CUST_11733_PI429285431	0.00905236	2.43864	lncRNA	lncipedia2.1	>lnc-PLS3-1:1	chrX	114959173	114959616	+	NA	NA	NA	inter
CUST_11012_PI429285431	0.00342003	2.4381	lncRNA	lncipedia2.1	>lnc-FSIP1-4:2	chr15	39811912	39812463	-	NA	NA	NA	inter
CUST_32475_PI429285431	0.029024	2.43781	lncRNA	NONCODERv3	>n339077|CR601490|mRNAlikelncRNA|Homosapiens|HumanlncRNA|JounralRNA|1507|NULL|-0.6191610|-0.1435215	chr16	11374697	11375115	-	PRM1	NA	chr16:11374693-11375192	inner
CUST_27338_PI429285431	0.0168842	2.43748	lncRNA	NONCODERv3	>n324494|NULL|mRNAlikelncRNA|Homosapiens|vegalncRNA|GENCODE|OTTHUMT00000040975|http://vega.sanger.ac.uk/Homo_sapiens/Transcript/Summary?db=core;t=OTTHUMT00000040975|-0.9706750|-0.3306585	chr6	53902937	53905533	+	MLIP	NA	chr6:53892937-53980052	inner
LNCA_21_P0005423	0.0236375	2.43523	lncRNA	Agilent_HUMAN_G3V2	ENST00000484322	chr7	124028512	124028571	+	NA	NA	NA	Unknown
CUST_29456_PI429285431	0.00788391	2.43415	lncRNA	NONCODERv3	>n332859|AF079569|mRNAlikelncRNA|Homosapiens|NULL|H-invitationalv7.5|HIT000066429|http://h-invitational.jp/hinv/spsoup/transcript_view?hit_id=HIT000066429|-0.3210100|-1.0000000	chr11	66488610	66488838	-	SPTBN2	NA	chr11:66478610-66488870	inner
CUST_24792_PI429285431	0.0185898	2.42726	lncRNA	lncipedia2.1	>lnc-WDR82-1:4	chr3	52322596	52323292	-	WDR82	NA	chr3:52312596-52312659	inter
CUST_41018_PI429285431	0.00630117	2.4263	lncRNA	NONCODERv3	>n411624|NR_040090_4|lncRNA|Homosapiens||RefGeneNoncode|NR_040090_4||-0.0594529|-0.1983676	chr6	3306122	3308550	+	SLC22A23	hg19_refFlat_TBXA2R:range=chr19:3594834-36006325'pad=0,hg19_refFlat_TBXA2R:range=chr19:3594834-36006325'pad=0 3'pad=0 strand=- repeatMasking=none,-85.10;hg19_refFlat_UBE2J2:range=chr1:1190583-12033725'pad=0,hg19_refFlat_UBE2J2:range=chr1:1190583-12033725'pad=0 3'pad=0 strand=- repeatMasking=none,-59.30;hg19_refFlat_EIF4E:range=chr4:99802179-998502635'pad=0,hg19_refFlat_EIF4E:range=chr4:99802179-9…	NA	inner
CUST_9071_PI429285431	0.0203693	2.42532	lncRNA	lncipedia2.1	>lnc-PERP-3:2	chr6	138146912	138147936	-	NA	NA	NA	inter
CUST_4881_PI429285431	0.0134372	2.42509	lncRNA	gencode_v17	>transcript_id "ENST00000561794.1" | genecode_v17	chr14	71648173	71648823	+	NA	NA	NA	inter
CUST_8156_PI429285431	0.0268161	2.41544	lncRNA	lncipedia2.1	>lnc-ATXN7-8:3	chr3	64959487	64961874	+	NA	NA	NA	inter
CUST_3165_PI429285431	0.000678347	2.41456	lncRNA	gencode_v17	>transcript_id "ENST00000517689.1" | genecode_v17	chr8	67104944	67105735	+	NA	hg19_refFlat_PTPRC:range=chr1:198608399-1986633105'pad=0,hg19_refFlat_PTPRC:range=chr1:198608399-1986633105'pad=0 3'pad=0 strand=+ repeatMasking=none,-74.70	NA	inter
CUST_30833_PI429285431	0.00949483	2.41018	lncRNA	NONCODERv3	>n336786|Z97033|mRNAlikelncRNA|Homosapiens|NULL|H-invitationalv7.5|HIT000328320|http://h-invitational.jp/hinv/spsoup/transcript_view?hit_id=HIT000328320|2.8982000|-0.0759668	chr14	106967049	106967480	-	NA	NA	NA	inter
LNCA_21_P0008232	0.0121148	2.40838	lncRNA	Agilent_HUMAN_G3V2	TCONS_00022143	chr13	24090494	24090553	+	NA	NA	NA	Unknown
CUST_10552_PI429285431	0.0282522	2.40482	lncRNA	lncipedia2.1	>lnc-COL6A3-2:1	chr2	238092632	238093069	-	NA	NA	NA	inter
CUST_28707_PI429285431	0.0348461	2.40421	lncRNA	NONCODERv3	>n326097|NULL|mRNAlikelncRNA|Homosapiens|vegalncRNA|GENCODE|OTTHUMT00000046506|http://vega.sanger.ac.uk/Homo_sapiens/Transcript/Summary?db=core;t=OTTHUMT00000046506|-0.8109800|-0.3126988	chr10	4275141	4275586	-	NA	NA	NA	inter
CUST_8547_PI429285431	0.0091129	2.4007	lncRNA	lncipedia2.1	>lnc-GRM6-1:1	chr5	178366753	178369039	-	ZNF454	hg19_refFlat_CYB561D1:range=chr1:110036762-1100388815'pad=0,hg19_refFlat_CYB561D1:range=chr1:110036762-1100388815'pad=0 3'pad=0 strand=+ repeatMasking=none,-79.70;hg19_refFlat_JAM2:range=chr21:27012134-270866175'pad=0,hg19_refFlat_JAM2:range=chr21:27012134-270866175'pad=0 3'pad=0 strand=+ repeatMasking=none,-74.10;hg19_refFlat_ZNF429:range=chr19:21688574-217208805'pad=0,hg19_refFlat_ZNF429:range=…	NA	inter
CUST_26982_PI429285431	0.000155457	2.3976	lncRNA	NONCODERv3	>n324072|NULL|mRNAlikelncRNA|Homosapiens|vegalncRNA|GENCODE|OTTHUMT00000052650|http://vega.sanger.ac.uk/Homo_sapiens/Transcript/Summary?db=core;t=OTTHUMT00000052650|-0.8698820|-0.1794466	chr9	74062071	74062431	+	NA	NA	NA	inter
CUST_1696_PI429285431	0.0263079	2.39715	lncRNA	gencode_v17	>transcript_id "ENST00000514103.1" | genecode_v17	chr4	11916291	11916713	+	NA	NA	NA	inter
CUST_34712_PI429285431	0.00034493	2.39625	lncRNA	NONCODERv3	>n341620|BC038357|mRNAlikelncRNA|Homosapiens|HumanlncRNA|JounralRNA|4091|NULL|-1.1321900|-0.3862816	chr8	139449100	139452099	-	FAM135B	NA	chr8:139439100-139499699	inner
CUST_37324_PI429285431	0.0234345	2.39377	lncRNA	NONCODERv3	>n345767|NULL|lincRNA|Homosapiens|HumanlincRNA|ScriptureReconstructionLincRNAsByLuo[unpublished]|linc_luo_1316|NULL|-1.2927400|-0.2566101	chr16	53076475	53078214	-	CHD9	NA	chr16:53066475-53090674	inter
LNCA_21_P0006339	0.0449322	2.39152	lncRNA	Agilent_HUMAN_G3V2	TCONS_00016530	chr9	1929503	1929562	+	NA	NA	NA	Unknown
LNCA_21_P0014513	0.0431519	2.39042	lncRNA	Agilent_HUMAN_G3V2	XR_110167	chr6	119502804	119502863	+	NA	NA	NA	Unknown
CUST_36944_PI429285431	0.0197506	2.38988	lncRNA	NONCODERv3	>n345415|NULL|lincRNA|Homosapiens|HumanlincRNA|ScriptureReconstructionLincRNAsByLuo[unpublished]|linc_luo_964|NULL|-1.6361800|-0.2855880	chr22	39573965	39574525	-	NA	NA	NA	inter
CUST_27687_PI429285431	0.0224017	2.38923	lncRNA	NONCODERv3	>n324894|NULL|mRNAlikelncRNA|Homosapiens|vegalncRNA|GENCODE|OTTHUMT00000158277|http://vega.sanger.ac.uk/Homo_sapiens/Transcript/Summary?db=core;t=OTTHUMT00000158277|-1.0673200|-0.2413155	chr21	18855803	18856475	-	CXADR	hg19_refFlat_ZNF410:range=chr14:74358879-743915065'pad=0,hg19_refFlat_ZNF410:range=chr14:74358879-743915065'pad=0 3'pad=0 strand=+ repeatMasking=none,-87.70;hg19_refFlat_BRD2:range=chr6_ssto_hap7:4421448-44292735'pad=0,hg19_refFlat_BRD2:range=chr6_ssto_hap7:4421448-44292735'pad=0 3'pad=0 strand=+ repeatMasking=none,-85.70;hg19_refFlat_ZMAT1:range=chrX:101138482-1011736065'pad=0,hg19_refFlat_ZMAT1…	NA	inner
CUST_41862_PI429285431	0.0127254	2.38513	lncRNA	ensembl.GRCh37.72	>ENST00000384966 ncrna:miRNA chromosome:GRCh37:19:54242587:54242673:1 gene:ENSG00000207699 gene_biotype:miRNA transcript_biotype:miRNA	chr19	54242587	54242673	+	NA	NA	NA	inter
LNCA_21_P0014394	0.0388898	2.38467	lncRNA	Agilent_HUMAN_G3V2	XR_109575	chr19	16189008	16189067	-	NA	NA	NA	Unknown
CUST_38576_PI429285431	0.0182008	2.38459	lncRNA	NONCODERv3	>n383554|NULL|lncRNA|Homosapiens||UCSCGeneNoncode|uc002qgs.1||2.6988000|-0.1765929	chr19	55222600	55224886	+	NA	NA	NA	inter
CUST_20014_PI429285431	0.0173597	2.38117	lncRNA	lncipedia2.1	>lnc-POLR2B-1:2	chr4	58071240	58071993	+	NA	hg19_refFlat_IGFBP7:range=chr4:57897483-579765175'pad=0,hg19_refFlat_IGFBP7:range=chr4:57897483-579765175'pad=0 3'pad=0 strand=- repeatMasking=none,-104.60;hg19_refFlat_IGFBP7:range=chr4:57898581-579765175'pad=0,hg19_refFlat_IGFBP7:range=chr4:57898581-579765175'pad=0 3'pad=0 strand=- repeatMasking=none,-104.60	NA	inter
CUST_18912_PI429285431	0.00733201	2.38013	lncRNA	lncipedia2.1	>lnc-AC110781.3.1-1:2	chr7	1785880	1788300	+	ELFN1	NA	chr7:1775880-1787590	inner
LNCA_21_P0011125	0.048544	2.37974	lncRNA	Agilent_HUMAN_G3V2	TCONS_l2_00006722	chr13	21929140	21929199	+	NA	NA	NA	Unknown
CUST_10954_PI429285431	0.000507448	2.3796	lncRNA	lncipedia2.1	>lnc-RAD51AP1-1:1	chr12	4675632	4675970	+	RAD51AP1	NA	chr12:4665632-4669213	inter
CUST_2679_PI429285431	0.0396874	2.37799	lncRNA	gencode_v17	>transcript_id "ENST00000603032.1" | genecode_v17	chr6	157744996	157745509	+	C6orf35	NA	chr6:157734996-157745253	inner
CUST_2138_PI429285431	0.0250539	2.3774	lncRNA	gencode_v17	>transcript_id "ENST00000510938.1" | genecode_v17	chr5	37939467	37939908	-	NA	NA	NA	inter
CUST_29928_PI429285431	0.019852	2.37604	lncRNA	NONCODERv3	>n334092|M37128|mRNAlikelncRNA|Homosapiens|NULL|H-invitationalv7.5|HIT000195707|http://h-invitational.jp/hinv/spsoup/transcript_view?hit_id=HIT000195707|-0.2955950|-0.1858278	chr19	52249198	52250246	+	FPR1	hg19_refFlat_FPR1:range=chr19:52249195-522502475'pad=0,hg19_refFlat_FPR1:range=chr19:52249195-522502475'pad=0 3'pad=0 strand=- repeatMasking=none,-98.40chr19:52249023-52255150	NA	inner
CUST_3753_PI429285431	0.0209675	2.37562	lncRNA	gencode_v17	>transcript_id "ENST00000432108.1" | genecode_v17	chr10	85671410	85671718	-	NA	NA	NA	inter
CUST_42991_PI429285431	0.011818	2.37438	lncRNA	ensembl.GRCh37.72	>ENST00000516170 ncrna:snoRNA chromosome:GRCh37:4:160428047:160428180:-1 gene:ENSG00000251979 gene_biotype:snoRNA transcript_biotype:snoRNA	chr4	160428047	160428180	-	NA	NA	NA	inter
CUST_2187_PI429285431	0.0323754	2.37359	lncRNA	gencode_v17	>transcript_id "ENST00000518473.1" | genecode_v17	chr5	70668503	70669003	-	NA	NA	NA	inter
CUST_12919_PI429285431	0.0153013	2.37346	lncRNA	lncipedia2.1	>lnc-CCDC80-1:1	chr3	112368163	112368578	-	CCDC80	NA	chr3:112358163-112359977	inter
CUST_34243_PI429285431	0.0224986	2.37277	lncRNA	NONCODERv3	>n341100|AF086444|mRNAlikelncRNA|Homosapiens|HumanlncRNA|JounralRNA|3566|NULL|-1.0909400|-0.3087078	chr11	94292183	94292549	+	PIWIL4	NA	chr11:94300474-94302540	inter
CUST_10102_PI429285431	0.00256961	2.3693	lncRNA	lncipedia2.1	>lnc-DYNC1I1-1:1	chr7	95301866	95302218	+	NA	NA	NA	inter
CUST_2588_PI429285431	0.03103	2.3693	lncRNA	gencode_v17	>transcript_id "ENST00000439279.1" | genecode_v17	chr6	98723022	98723247	+	NA	NA	NA	inter
CUST_50288_PI429285431	0.0270301	2.36899	lncRNA	UCSC	>hg19_lincRNAsTranscripts_TCONS_l2_00028843 range=chr9:76064311-76092053 5'pad=0 3'pad=0 strand=+ repeatMasking=none	chr9	76082311	76082892	+	NA	hg19_refFlat_DPP3:range=chr11:66249672-662767225'pad=0,hg19_refFlat_DPP3:range=chr11:66249672-662767225'pad=0 3'pad=0 strand=+ repeatMasking=none,-94.60	NA	inter
CUST_33532_PI429285431	0.021005	2.36863	lncRNA	NONCODERv3	>n340273|BC043512|mRNAlikelncRNA|Homosapiens|HumanlncRNA|JounralRNA|2734|NULL|-0.9450140|-0.4090214	chr4	173555834	173558032	-	GALNTL6	NA	chr4:173545834-173658029	inner
CUST_32525_PI429285431	0.0343659	2.36715	lncRNA	NONCODERv3	>n339132|AF085911|mRNAlikelncRNA|Homosapiens|HumanlncRNA|JounralRNA|1562|NULL|0.0749479|-0.1780669	chr16	24904061	24904450	-	SLC5A11	hg19_refFlat_YIF1B:range=chr19:38796129-388065575'pad=0,hg19_refFlat_YIF1B:range=chr19:38796129-388065575'pad=0 3'pad=0 strand=- repeatMasking=none,-78.30;hg19_refFlat_C8orf44:range=chr8:67589944-675921895'pad=0,hg19_refFlat_C8orf44:range=chr8:67589944-675921895'pad=0 3'pad=0 strand=+ repeatMasking=none,-76.50;hg19_refFlat_SEPP1:range=chr5:42800822-428108695'pad=0,hg19_refFlat_SEPP1:range=chr5:42…	NA	inner
CUST_48153_PI429285431	0.0110345	2.36591	lncRNA	ncbi	>gi|410169917|ref|XR_172430.1| PREDICTED: Homo sapiens hect domain and RLD 2 pseudogene 7 (HERC2P7), misc_RNA	NA	NA	NA	NA	NA	hg19_refFlat_NANOGNB:range=chr12:7917882-79264475'pad=0,hg19_refFlat_NANOGNB:range=chr12:7917882-79264475'pad=0 3'pad=0 strand=+ repeatMasking=none,-75.20;hg19_refFlat_ZNF91:range=chr19:23542205-235781565'pad=0,hg19_refFlat_ZNF91:range=chr19:23542205-235781565'pad=0 3'pad=0 strand=- repeatMasking=none,-82.20;hg19_refFlat_BIRC5:range=chr17:76210398-762196355'pad=0,hg19_refFlat_BIRC5:range=chr17:76…	NA	Unknown
CUST_44817_PI429285431	0.0223654	2.36517	lncRNA	ncbi	>gi|388596719|ref|NR_049793.1| Homo sapiens uncharacterized LOC100130476 (LOC100130476), non-coding RNA	Chr6	138144806	138146770	-	NA	NA	NA	inter
CUST_13236_PI429285431	0.0410619	2.3635	lncRNA	lncipedia2.1	>lnc-ARMCX4-1:1	chrX	100672508	100672942	+	RPL36A-HNRNPH2	NA	chrX:100662508-100669128	inter
LNCA_21_P0006127	0.00545341	2.36258	lncRNA	Agilent_HUMAN_G3V2	TCONS_00015920	chr9	12770096	12770155	+	NA	NA	NA	Unknown
CUST_44392_PI429285431	0.0383379	2.3599	lncRNA	ncbi	>gi|334085197|ref|NR_038303.1| Homo sapiens uncharacterized LOC100505702 (LOC100505702), transcript variant 1, non-coding RNA	Chr4	79570148	79571447	+	NA	hg19_refFlat_ZNF700:range=chr19:12037391-120610685'pad=0,hg19_refFlat_ZNF700:range=chr19:12037391-120610685'pad=0 3'pad=0 strand=+ repeatMasking=none,-74.20;hg19_refFlat_MYL10:range=chr7:101256755-1012723985'pad=0,hg19_refFlat_MYL10:range=chr7:101256755-1012723985'pad=0 3'pad=0 strand=- repeatMasking=none,-78.80;hg19_refFlat_NPC1L1:range=chr7:44553046-445808585'pad=0,hg19_refFlat_NPC1L1:range=chr…	NA	inter
CUST_23056_PI429285431	0.0104059	2.35693	lncRNA	lncipedia2.1	>lnc-SLC25A37-3:1	chr8	23646935	23647186	+	NA	NA	NA	inter
CUST_6174_PI429285431	0.0401452	2.35359	lncRNA	gencode_v17	>transcript_id "ENST00000600127.1" | genecode_v17	chr18	45100967	45101670	+	NA	NA	NA	inter
CUST_3109_PI429285431	0.028356	2.35072	lncRNA	gencode_v17	>transcript_id "ENST00000605536.1" | genecode_v17	chr8	56449431	56452430	+	NA	NA	NA	inter
CUST_18408_PI429285431	0.0359291	2.35058	lncRNA	lncipedia2.1	>lnc-GNAT1-1:9	chr3	50254670	50255093	+	SLC38A3	NA	chr3:50244670-50258406	inner
LNCA_21_P0006436	0.0374265	2.34901	lncRNA	Agilent_HUMAN_G3V2	ENST00000424539	chrX	150088404	150089312	+	NA	NA	NA	Unknown
CUST_25607_PI429285431	0.0353633	2.34441	lncRNA	lncipedia2.1	>lnc-IRX3-4:18	chr16	54957497	54957960	-	IRX5	NA	chr16:54965111-54967691	inter
CUST_47455_PI429285431	0.00349806	2.34303	lncRNA	ncbi	>gi|218082838|ref|NR_024583.1| Homo sapiens POM121 transmembrane nucleoporin-like 8 pseudogene (POM121L8P), non-coding RNA	Chr22	21639714	21642713	+	NA	hg19_refFlat_BCL2L11:range=chr2:111881323-1118878125'pad=0,hg19_refFlat_BCL2L11:range=chr2:111881323-1118878125'pad=0 3'pad=0 strand=+ repeatMasking=none,-76.00;hg19_refFlat_MRPL10:range=chr17:45901571-459065865'pad=0,hg19_refFlat_MRPL10:range=chr17:45901571-459065865'pad=0 3'pad=0 strand=- repeatMasking=none,-82.80;hg19_refFlat_RHBG:range=chr1:156339204-1563546375'pad=0,hg19_refFlat_RHBG:range=c…	NA	inter
CUST_18671_PI429285431	0.0236397	2.34287	lncRNA	lncipedia2.1	>lnc-C17orf103-1:1	chr17	21156472	21159471	-	C17orf103	hg19_refFlat_ISY1:range=chr3:128848924-1288798185'pad=0,hg19_refFlat_ISY1:range=chr3:128848924-1288798185'pad=0 3'pad=0 strand=- repeatMasking=none,-84.20;hg19_refFlat_ZNF714:range=chr19:21281075-213011355'pad=0,hg19_refFlat_ZNF714:range=chr19:21281075-213011355'pad=0 3'pad=0 strand=+ repeatMasking=none,-77.50;hg19_refFlat_ADAMTS2:range=chr5:178578130-1787723295'pad=0,hg19_refFlat_ADAMTS2:range=c…	NA	inner
LNCA_21_P0010373	0.00489162	2.3427	lncRNA	Agilent_HUMAN_G3V2	ENST00000440477	chr22	27853296	27853355	-	NA	NA	NA	Unknown
CUST_39558_PI429285431	0.0141515	2.34198	lncRNA	NONCODERv3	>n387500|NULL|lncRNA|Homosapiens||UCSCGeneNoncode|uc011fvc.1||-0.9402570|-0.2798115	chr6	1267559	1268250	+	NA	NA	NA	inter
CUST_34426_PI429285431	0.0436319	2.34041	lncRNA	NONCODERv3	>n341302|BC022431|mRNAlikelncRNA|Homosapiens|HumanlncRNA|JounralRNA|3771|NULL|1.5978400|-0.3500844	chr7	114719011	114720226	+	NA	NA	NA	inter
CUST_51702_PI429285431	0.0324263	2.33801	lncRNA	UCSC	>hg19_lincRNAsTranscripts_TCONS_l2_00011771 range=chr18:11638006-11677400 5'pad=0 3'pad=0 strand=+ repeatMasking=none	chr18	11647006	11647162	+	NA	hg19_refFlat_PRR16:range=chr5:119816899-1200224045'pad=0,hg19_refFlat_PRR16:range=chr5:119816899-1200224045'pad=0 3'pad=0 strand=+ repeatMasking=none,-77.70;hg19_refFlat_MTO1:range=chr6:74171578-742104585'pad=0,hg19_refFlat_MTO1:range=chr6:74171578-742104585'pad=0 3'pad=0 strand=+ repeatMasking=none,-24.40;hg19_refFlat_BRD2:range=chr6_ssto_hap7:4421448-44292735'pad=0,hg19_refFlat_BRD2:range=chr6_…	NA	inter
CUST_24609_PI429285431	0.0189367	2.33793	lncRNA	lncipedia2.1	>lnc-DHRS7B-5:19	chr17	20859947	20860568	+	NA	NA	NA	inter
CUST_44431_PI429285431	0.0249702	2.33793	lncRNA	ncbi	>gi|397139075|ref|XR_109838.2| PREDICTED: Homo sapiens SMARCA5 antisense RNA 1 (SMARCA5-AS1), misc_RNA	NA	NA	NA	NA	NA	hg19_refFlat_SMARCA5:range=chr4:144435078-1444743375'pad=0,hg19_refFlat_SMARCA5:range=chr4:144435078-1444743375'pad=0 3'pad=0 strand=+ repeatMasking=none,-106.50	NA	Unknown
LNCA_21_P0002884	0.0024239	2.33522	lncRNA	Agilent_HUMAN_G3V2	ENST00000506934	chr3	139407400	139407459	-	NA	NA	NA	Unknown
LNCA_19_P00316341	0.0129514	2.3346	lncRNA	Agilent_HUMAN_G3V2	XR_108813	chr7	130606583	130606642	+	NA	NA	NA	Unknown
CUST_5183_PI429285431	0.0117407	2.33359	lncRNA	gencode_v17	>transcript_id "ENST00000559909.1" | genecode_v17	chr15	51329685	51330245	+	TNFAIP8L3	NA	chr15:51348798-51397473	inner
CUST_217_PI429201921	0.0219207	2.33192	lncRNA	Affy_HUMAN_HTA2.0	linc-LRIT1-1	chr10	86953175	86955677	-	NA	NA	NA	Unknown
CUST_27994_PI429285431	0.043905	2.33132	lncRNA	NONCODERv3	>n325248|NULL|mRNAlikelncRNA|Homosapiens|vegalncRNA|GENCODE|OTTHUMT00000328657|http://vega.sanger.ac.uk/Homo_sapiens/Transcript/Summary?db=core;t=OTTHUMT00000328657|-1.2135700|-0.2918613	chr2	75012062	75012502	+	HK2	hg19_refFlat_ZNF410:range=chr14:74358879-743915065'pad=0,hg19_refFlat_ZNF410:range=chr14:74358879-743915065'pad=0 3'pad=0 strand=+ repeatMasking=none,-85.50;hg19_refFlat_BRD2:range=chr6:32940676-329484955'pad=0,hg19_refFlat_BRD2:range=chr6:32940676-329484955'pad=0 3'pad=0 strand=+ repeatMasking=none,-84.20;hg19_refFlat_MYL10:range=chr7:101256755-1012723985'pad=0,hg19_refFlat_MYL10:range=chr7:1012…	NA	inter
CUST_8311_PI429285431	0.0222002	2.32858	lncRNA	lncipedia2.1	>lnc-SLC25A2-3:1	chr5	140595338	140598258	-	PCDHB1	hg19_refFlat_PCDHB5:range=chr5:140515017-1405174045'pad=0,hg19_refFlat_PCDHB5:range=chr5:140515017-1405174045'pad=0 3'pad=0 strand=+ repeatMasking=none,-104.80;hg19_refFlat_PCDHB2:range=chr5:140474375-1404767715'pad=0,hg19_refFlat_PCDHB2:range=chr5:140474375-1404767715'pad=0 3'pad=0 strand=+ repeatMasking=none,-107.50;hg19_refFlat_PCDHB4:range=chr5:140501581-1405039685'pad=0,hg19_refFlat_PCDHB4:r…	NA	inner
CUST_3590_PI429285431	0.0246948	2.32434	lncRNA	gencode_v17	>transcript_id "ENST00000413993.1" | genecode_v17	chr10	3529086	3529917	-	NA	NA	NA	inter
CUST_34301_PI429285431	0.0188336	2.32295	lncRNA	NONCODERv3	>n341160|BC028622|mRNAlikelncRNA|Homosapiens|HumanlncRNA|JounralRNA|3626|NULL|0.4923630|-0.2054613	chr11	132937585	132938031	+	OPCML	hg19_refFlat_ISY1:range=chr3:128848924-1288798185'pad=0,hg19_refFlat_ISY1:range=chr3:128848924-1288798185'pad=0 3'pad=0 strand=- repeatMasking=none,-78.70chr11:132924585-132948017	NA	inner
CUST_14598_PI429285431	0.0162825	2.32144	lncRNA	lncipedia2.1	>lnc-IGFL1-1:5	chr19	46717054	46719421	+	IGFL1	NA	chr19:46722592-46728714	inter
CUST_39908_PI429285431	0.00982642	2.32135	lncRNA	NONCODERv3	>n406641|NR_024170|lncRNA|Homosapiens||RefGeneNoncode|NR_024170||2.2617500|-0.4031734	chr4	100802494	100803727	-	LAMTOR3	hg19_refFlat_TSFM:range=chr12:58176585-581903665'pad=0,hg19_refFlat_TSFM:range=chr12:58176585-581903665'pad=0 3'pad=0 strand=+ repeatMasking=none,-39.40chr4:100799495-100815703	NA	inner
LNCA_24_P375761	0.0375384	2.32126	lncRNA	Agilent_HUMAN_G3V2	XR_110003	chr3	49298375	49298434	+	NA	NA	NA	Unknown
CUST_30434_PI429285431	0.0193823	2.31866	lncRNA	NONCODERv3	>n335570|CR541962|mRNAlikelncRNA|Homosapiens|NULL|H-invitationalv7.5|HIT000268832|http://h-invitational.jp/hinv/spsoup/transcript_view?hit_id=HIT000268832|-0.9270880|-0.2573401	chr15	80253412	80253934	+	BCL2A1	hg19_refFlat_BCL2A1:range=chr15:80253409-802634615'pad=0,hg19_refFlat_BCL2A1:range=chr15:80253409-802634615'pad=0 3'pad=0 strand=- repeatMasking=none,-86.90;hg19_refFlat_ST20:range=chr15:80191273-802000155'pad=0,hg19_refFlat_ST20:range=chr15:80191273-802000155'pad=0 3'pad=0 strand=- repeatMasking=none,-73.60;hg19_refFlat_BCL2A1:range=chr15:80253501-802634615'pad=0,hg19_refFlat_BCL2A1:range=chr15:…	NA	inner
CUST_36957_PI429285431	0.0194571	2.31565	lncRNA	NONCODERv3	>n345422|NULL|lincRNA|Homosapiens|HumanlincRNA|ScriptureReconstructionLincRNAsByLuo[unpublished]|linc_luo_971|NULL|-1.3087300|-0.2114874	chr1	201489784	201491047	+	CSRP1	hg19_refFlat_RGS3:range=chr9:116222537-1163592335'pad=0,hg19_refFlat_RGS3:range=chr9:116222537-1163592335'pad=0 3'pad=0 strand=+ repeatMasking=none,-76.60;hg19_refFlat_ISY1:range=chr3:128848924-1288798185'pad=0,hg19_refFlat_ISY1:range=chr3:128848924-1288798185'pad=0 3'pad=0 strand=- repeatMasking=none,-81.90;hg19_refFlat_NANOGNB:range=chr12:7917882-79264475'pad=0,hg19_refFlat_NANOGNB:range=chr12:…	NA	inter
CUST_36982_PI429285431	0.0109468	2.3146	lncRNA	NONCODERv3	>n345444|NULL|lincRNA|Homosapiens|HumanlincRNA|ScriptureReconstructionLincRNAsByLuo[unpublished]|linc_luo_993|NULL|-1.2941500|-0.3189713	chr1	61425137	61425917	-	NA	NA	NA	inter
LNCA_21_P0008623	0.00465401	2.30766	lncRNA	Agilent_HUMAN_G3V2	THC2626981	chr15	41202458	41202517	+	NA	NA	NA	Unknown
CUST_35985_PI429285431	0.0467678	2.30661	lncRNA	NONCODERv3	>n344602|NULL|lincRNA|Homosapiens|HumanlincRNA|ScriptureReconstructionLincRNAsByLuo[unpublished]|linc_luo_150|NULL|-1.3538700|-0.4256448	chr8	115299950	115301477	-	NA	NA	NA	inter
CUST_11750_PI429285431	0.0388088	2.30624	lncRNA	lncipedia2.1	>lnc-PPARGC1B-1:1	chr5	149100522	149101112	+	PPARGC1B	NA	chr5:149109815-149111072	inter
CUST_12644_PI429285431	0.0475749	2.30551	lncRNA	lncipedia2.1	>lnc-NKX2-5-1:1	chr5	172672696	172674120	-	NKX2-5	NA	chr5:172659696-172662315	inter
LNCA_21_P0002571	0.0283214	2.30424	lncRNA	Agilent_HUMAN_G3V2	TCONS_00004690	chr2	8810361	8810420	+	NA	NA	NA	Unknown
CUST_20936_PI429285431	0.0233646	2.30136	lncRNA	lncipedia2.1	>lnc-IFIT2-1:1	chr10	91051744	91052375	+	IFIT2	NA	chr10:91061706-91061748	inter
CUST_34315_PI429285431	0.0432228	2.30005	lncRNA	NONCODERv3	>n341176|BC034306|mRNAlikelncRNA|Homosapiens|HumanlncRNA|JounralRNA|3642|NULL|-0.1530460|-0.2515004	chr7	4936898	4938492	-	MMD2	hg19_refFlat_NUDT7:range=chr16:77756480-777755495'pad=0,hg19_refFlat_NUDT7:range=chr16:77756480-777755495'pad=0 3'pad=0 strand=+ repeatMasking=none,-84.80;hg19_refFlat_EIF4E:range=chr4:99802179-998502635'pad=0,hg19_refFlat_EIF4E:range=chr4:99802179-998502635'pad=0 3'pad=0 strand=- repeatMasking=none,-79.50;hg19_refFlat_BTG3:range=chr21:18966411-189814625'pad=0,hg19_refFlat_BTG3:range=chr21:189664…	NA	inter
CUST_8461_PI429285431	0.0135324	2.29832	lncRNA	lncipedia2.1	>lnc-ANAPC10-1:1	chr4	145582427	145583072	-	HHIP	hg19_refFlat_HHIP:range=chr4:145567828-1456591095'pad=0,hg19_refFlat_HHIP:range=chr4:145567828-1456591095'pad=0 3'pad=0 strand=+ repeatMasking=none,-96.90chr4:145572427-145592509	NA	inner
CUST_37848_PI429285431	0.0158083	2.29406	lncRNA	NONCODERv3	>n346377|NULL|lincRNA|Homosapiens|HumanlincRNA|ScriptureReconstructionLincRNAsByLuo[unpublished]|linc_luo_1927|NULL|-1.3449100|-0.1585905	chr16	18582581	18583174	+	NOMO2	NA	chr16:18572581-18573434	inter
LNCA_21_P0000959	0.0360592	2.29398	lncRNA	Agilent_HUMAN_G3V2	ENST00000448791	chr1	27204677	27204736	+	NA	NA	NA	Unknown
CUST_25343_PI429285431	0.0160157	2.29328	lncRNA	lncipedia2.1	>lnc-SLC39A11-1:30	chr17	70321934	70322288	-	NA	NA	NA	inter
CUST_27619_PI429285431	0.0165111	2.28966	lncRNA	NONCODERv3	>n324823|NULL|mRNAlikelncRNA|Homosapiens|vegalncRNA|GENCODE|OTTHUMT00000171972|http://vega.sanger.ac.uk/Homo_sapiens/Transcript/Summary?db=core;t=OTTHUMT00000171972|-1.0276500|-0.4377057	chr21	29476218	29476544	-	NA	NA	NA	inter
CUST_9492_PI429285431	0.0328563	2.2894	lncRNA	lncipedia2.1	>lnc-PERP-3:1	chr6	138148058	138149056	-	NA	NA	NA	inter
CUST_17300_PI429285431	0.00790287	2.28939	lncRNA	lncipedia2.1	>lnc-DET1-2:1	chr15	89147578	89148747	-	NA	NA	NA	inter
LNCA_21_P0007455	0.00638333	2.28913	lncRNA	Agilent_HUMAN_G3V2	TCONS_00020022	chr11	126926107	126926166	+	NA	NA	NA	Unknown
LNCA_21_P0008761	0.00358669	2.28837	lncRNA	Agilent_HUMAN_G3V2	TCONS_00023746	chr15	79019950	79020009	-	NA	NA	NA	Unknown
CUST_19093_PI429285431	0.0269575	2.28686	lncRNA	lncipedia2.1	>lnc-MTAP-2:1	NA	NA	2999	NA	NA	hg19_refFlat_BIRC5:range=chr17:76210398-762196355'pad=0,hg19_refFlat_BIRC5:range=chr17:76210398-762196355'pad=0 3'pad=0 strand=+ repeatMasking=none,-87.30;hg19_refFlat_CAGE1:range=chr6:7329398-73874065'pad=0,hg19_refFlat_CAGE1:range=chr6:7329398-73874065'pad=0 3'pad=0 strand=- repeatMasking=none,-89.10;hg19_refFlat_C7orf69:range=chr7:47834934-478591955'pad=0,hg19_refFlat_C7orf69:range=chr7:478349…	NA	Unknown
CUST_36820_PI429285431	0.00873881	2.28534	lncRNA	NONCODERv3	>n345297|NULL|lincRNA|Homosapiens|HumanlincRNA|ScriptureReconstructionLincRNAsByLuo[unpublished]|linc_luo_846|NULL|-1.4826700|-0.2689157	chr15	82033988	82035761	-	NA	NA	NA	inter
CUST_19485_PI429285431	0.0281969	2.28496	lncRNA	lncipedia2.1	>lnc-MACC1-1:5	chr7	20164703	20165445	-	MACC1	NA	chr7:20174278-20174785	inter
CUST_30869_PI429285431	0.00113133	2.28479	lncRNA	NONCODERv3	>n336877|AY686872|mRNAlikelncRNA|Homosapiens|NULL|H-invitationalv7.5|HIT000332098|http://h-invitational.jp/hinv/spsoup/transcript_view?hit_id=HIT000332098|2.6297000|-0.0422969	chr14	106330425	106330787	-	LOC100288568	NA	chr14:106833231-106859077	inter
LNCA_19_P00327081	0.0335398	2.28456	lncRNA	Agilent_HUMAN_G3V2	TCONS_l2_00001718	chr1	204336683	204336742	-	NA	NA	NA	Unknown
CUST_48989_PI429285431	0.000889932	2.28207	lncRNA	UCSC	>hg19_lincRNAsTranscripts_TCONS_l2_00019107 range=chr3:196181573-196192929 5'pad=0 3'pad=0 strand=+ repeatMasking=none	chr3	196181573	196184572	+	RNF168	hg19_refFlat_MYL10:range=chr7:101256755-1012723985'pad=0,hg19_refFlat_MYL10:range=chr7:101256755-1012723985'pad=0 3'pad=0 strand=- repeatMasking=none,-80.50;hg19_refFlat_SULT1C2:range=chr2:108910124-1089249205'pad=0,hg19_refFlat_SULT1C2:range=chr2:108910124-1089249205'pad=0 3'pad=0 strand=+ repeatMasking=none,-69.70;hg19_refFlat_NOS3:range=chr7:150690892-1507004915'pad=0,hg19_refFlat_NOS3:range=c…	NA	inter
CUST_51123_PI429285431	0.00165453	2.28191	lncRNA	UCSC	>hg19_lincRNAsTranscripts_TCONS_l2_00007025 range=chr13:114053727-114064046 5'pad=0 3'pad=0 strand=+ repeatMasking=none	chr13	114059727	114062726	+	NA	hg19_refFlat_SEPP1:range=chr5:42800822-428108695'pad=0,hg19_refFlat_SEPP1:range=chr5:42800822-428108695'pad=0 3'pad=0 strand=- repeatMasking=none,-83.70;hg19_refFlat_TCF4:range=chr18:52895456-533031285'pad=0,hg19_refFlat_TCF4:range=chr18:52895456-533031285'pad=0 3'pad=0 strand=- repeatMasking=none,-79.90;hg19_refFlat_SLC4A8:range=chr12:51844689-518740065'pad=0,hg19_refFlat_SLC4A8:range=chr12:5184…	NA	inter
CUST_31726_PI429285431	0.00044219	2.27761	lncRNA	NONCODERv3	>n338259|BC059953|mRNAlikelncRNA|Homosapiens|HumanlncRNA|JounralRNA|652|NULL|-1.0751100|-0.1945415	chr19	637104	637551	-	RNF126	NA	chr19:647526-647537	inter
CUST_7686_PI429285431	0.0151627	2.27755	lncRNA	lncipedia2.1	>lnc-RP11-582J16.5.1-2:1	chr8	22449664	22451306	-	PDLIM2	hg19_refFlat_EIF4E:range=chr4:99802179-998502635'pad=0,hg19_refFlat_EIF4E:range=chr4:99802179-998502635'pad=0 3'pad=0 strand=- repeatMasking=none,-70.50;hg19_refFlat_CAGE1:range=chr6:7329398-73874065'pad=0,hg19_refFlat_CAGE1:range=chr6:7329398-73874065'pad=0 3'pad=0 strand=- repeatMasking=none,-82.70;hg19_refFlat_RQCD1:range=chr2:219433678-2194589995'pad=0,hg19_refFlat_RQCD1:range=chr2:219433678-…	NA	inner
CUST_9957_PI429285431	0.00613398	2.27699	lncRNA	lncipedia2.1	>lnc-OSBPL1A-7:1	chr18	22251460	22252048	-	NA	NA	NA	inter
CUST_5362_PI429285431	0.0289077	2.27672	lncRNA	gencode_v17	>transcript_id "ENST00000559755.1" | genecode_v17	chr15	101256454	101257096	+	NA	NA	NA	inter
CUST_12661_PI429285431	0.0182501	2.27551	lncRNA	lncipedia2.1	>lnc-NUMB-1:2	chr14	73930181	73930620	-	NUMB	NA	chr14:73920181-73925286	inter
CUST_20529_PI429285431	0.00784575	2.27379	lncRNA	lncipedia2.1	>lnc-LIFR-4:1	chr5	38346595	38347146	-	EGFLAM	NA	chr5:38336595-38356653	inner
CUST_7052_PI429285431	0.00424154	2.27319	lncRNA	gencode_v17	>transcript_id "ENST00000602277.1" | genecode_v17	chrX	45624175	45624702	-	NA	NA	NA	inter
CUST_5940_PI429285431	0.0198433	2.27208	lncRNA	gencode_v17	>transcript_id "ENST00000587999.1" | genecode_v17	chr17	66587937	66588527	+	FAM20A	NA	chr17:66577937-66597095	inner
CUST_28022_PI429285431	0.0489275	2.27158	lncRNA	NONCODERv3	>n325283|NULL|mRNAlikelncRNA|Homosapiens|vegalncRNA|GENCODE|OTTHUMT00000327461|http://vega.sanger.ac.uk/Homo_sapiens/Transcript/Summary?db=core;t=OTTHUMT00000327461|-1.1097000|-0.2991198	chr2	65111384	65112401	-	NA	hg19_refFlat_OSTC:range=chr4:109571812-1095884135'pad=0,hg19_refFlat_OSTC:range=chr4:109571812-1095884135'pad=0 3'pad=0 strand=+ repeatMasking=none,-80.80;hg19_refFlat_BRD2:range=chr6_mann_hap4:4397903-44057165'pad=0,hg19_refFlat_BRD2:range=chr6_mann_hap4:4397903-44057165'pad=0 3'pad=0 strand=+ repeatMasking=none,-80.90;hg19_refFlat_MAP4K1:range=chr19:39078450-391085355'pad=0,hg19_refFlat_MAP4K1:…	NA	inter
CUST_35276_PI429285431	0.0478061	2.26238	lncRNA	NONCODERv3	>n342285|AL109699|mRNAlikelncRNA|Homosapiens|HumanlncRNA|JounralRNA|4777|NULL|-0.9213400|-0.1891020	chr15	90617746	90618931	-	ZNF710	NA	chr15:90610342-90625432	inner
CUST_36904_PI429285431	0.0157343	2.26235	lncRNA	NONCODERv3	>n345377|NULL|lincRNA|Homosapiens|HumanlincRNA|ScriptureReconstructionLincRNAsByLuo[unpublished]|linc_luo_926|NULL|-1.5646300|-0.2690117	chr19	31851202	31851559	+	NA	NA	NA	inter
CUST_47142_PI429285431	0.0426259	2.26069	lncRNA	ncbi	>gi|410170751|ref|XR_132658.3| PREDICTED: Homo sapiens uncharacterized LOC400706 (LOC400706), misc_RNA	NA	NA	NA	NA	NA	NA	NA	Unknown
CUST_12941_PI429285431	0.0227849	2.25997	lncRNA	lncipedia2.1	>lnc-KCNQ2-2:1	chr20	62110344	62111683	-	EEF1A2	NA	chr20:62119366-62121644	inter
CUST_51526_PI429285431	0.0212507	2.25935	lncRNA	UCSC	>hg19_lincRNAsTranscripts_TCONS_l2_00011139 range=chr17:20432533-20460098 5'pad=0 3'pad=0 strand=- repeatMasking=none	chr17	20435533	20438532	-	CDRT15L2	hg19_refFlat_NEK5:range=chr13:52639543-527016185'pad=0,hg19_refFlat_NEK5:range=chr13:52639543-527016185'pad=0 3'pad=0 strand=- repeatMasking=none,-73.10;hg19_refFlat_BRD2:range=chr6_cox_hap2:4385214-43930395'pad=0,hg19_refFlat_BRD2:range=chr6_cox_hap2:4385214-43930395'pad=0 3'pad=0 strand=+ repeatMasking=none,-83.20;hg19_refFlat_TSFM:range=chr12:58176585-581903665'pad=0,hg19_refFlat_TSFM:range=ch…	NA	inter
CUST_41948_PI429285431	0.0499405	2.25895	lncRNA	ensembl.GRCh37.72	>ENST00000362237 ncrna:miRNA chromosome:GRCh37:14:101531637:101531715:1 gene:ENSG00000199107 gene_biotype:miRNA transcript_biotype:miRNA	chr14	101531637	101531715	+	NA	NA	NA	inter
CUST_8609_PI429285431	0.0151744	2.25712	lncRNA	lncipedia2.1	>lnc-TMPRSS11E-1:6	chr4	68945839	68946247	+	TMPRSS11F	hg19_refFlat_SYT14:range=chr1:210187031-2103343875'pad=0,hg19_refFlat_SYT14:range=chr1:210187031-2103343875'pad=0 3'pad=0 strand=+ repeatMasking=none,-72.00;hg19_refFlat_SYT14:range=chr1:210111610-2103343875'pad=0,hg19_refFlat_SYT14:range=chr1:210111610-2103343875'pad=0 3'pad=0 strand=+ repeatMasking=none,-72.00;hg19_refFlat_SYT14:range=chr1:210111596-2103343875'pad=0,hg19_refFlat_SYT14:range=chr…	NA	inner
CUST_14226_PI429285431	0.0277834	2.25641	lncRNA	lncipedia2.1	>lnc-AC131097.4.1-3:3	chr2	243026247	243026915	-	NA	NA	NA	inter
CUST_33642_PI429285431	0.0366623	2.25212	lncRNA	NONCODERv3	>n340404|AF056420|mRNAlikelncRNA|Homosapiens|HumanlncRNA|JounralRNA|2865|NULL|1.6195100|-0.1488856	chr5	10994668	10995253	-	CTNND2	NA	chr5:10984668-11005255	inner
CUST_10448_PI429285431	0.0108073	2.24817	lncRNA	lncipedia2.1	>lnc-BMP6-9:2	chr6	8938582	8940652	+	NA	NA	NA	inter
CUST_36402_PI429285431	0.00967954	2.24687	lncRNA	NONCODERv3	>n344919|NULL|lincRNA|Homosapiens|HumanlincRNA|ScriptureReconstructionLincRNAsByLuo[unpublished]|linc_luo_468|NULL|-1.3155700|-0.3664937	chr6	98723039	98723670	+	NA	NA	NA	inter
CUST_17062_PI429285431	0.0366063	2.24583	lncRNA	lncipedia2.1	>lnc-AL445989.1-2:1	chr13	64209594	64210404	+	NA	hg19_refFlat_LOC100505549:range=chr18:55309146-553354075'pad=0,hg19_refFlat_LOC100505549:range=chr18:55309146-553354075'pad=0 3'pad=0 strand=+ repeatMasking=none,-72.40;hg19_refFlat_SLC2A14:range=chr12:7966912-80160515'pad=0,hg19_refFlat_SLC2A14:range=chr12:7966912-80160515'pad=0 3'pad=0 strand=- repeatMasking=none,-70.00;hg19_refFlat_C6orf7:range=chr6:80513592-805800385'pad=0,hg19_refFlat_C6orf7…	NA	inter
CUST_51965_PI429285431	0.0433347	2.24552	lncRNA	UCSC	>hg19_lincRNAsTranscripts_TCONS_l2_00016248 range=chr20:37230676-37256614 5'pad=0 3'pad=0 strand=+ repeatMasking=none	chr20	37230676	37231899	+	ARHGAP40	NA	chr20:37230577-37266614	inner
CUST_39565_PI429285431	0.0143864	2.24199	lncRNA	NONCODERv3	>n387525|NULL|lncRNA|Homosapiens||UCSCGeneNoncode|uc011gqt.1||-1.0399300|-0.2705092	chr6	1186622	1187677	-	NA	NA	NA	inter
LNCA_21_P0006715	0.0203633	2.24069	lncRNA	Agilent_HUMAN_G3V2	ENST00000449693	chr10	127389115	127389174	+	NA	NA	NA	Unknown
CUST_37452_PI429285431	0.00290568	2.24058	lncRNA	NONCODERv3	>n345902|NULL|lincRNA|Homosapiens|HumanlincRNA|ScriptureReconstructionLincRNAsByLuo[unpublished]|linc_luo_1451|NULL|-1.3778800|-0.2708561	chr8	132324623	132327258	+	NA	NA	NA	inter
LNCA_21_P0008203	0.00426252	2.24012	lncRNA	Agilent_HUMAN_G3V2	TCONS_00022089	chr13	96737160	96737219	-	NA	NA	NA	Unknown
CUST_4061_PI429285431	0.0108981	2.23986	lncRNA	gencode_v17	>transcript_id "ENST00000529088.1" | genecode_v17	chr11	97093644	97094377	-	NA	NA	NA	inter
CUST_7501_PI429285431	0.0384886	2.23968	lncRNA	lncipedia2.1	>lnc-LLPH-2:1	chr12	66275018	66275993	-	HMGA2	NA	chr12:66265018-66285358	inner
LNCA_21_P0007230	0.000734872	2.23896	lncRNA	Agilent_HUMAN_G3V2	TCONS_00019371	chr11	69680412	69681838	+	NA	NA	NA	Unknown
CUST_21236_PI429285431	0.00274229	2.23771	lncRNA	lncipedia2.1	>lnc-STRA6-1:1	chr15	74471497	74472050	-	STRA6	NA	chr15:74471807-74481567	inter
CUST_1750_PI429285431	0.00308681	2.23609	lncRNA	gencode_v17	>transcript_id "ENST00000533736.1" | genecode_v17	chr4	39640760	39641820	+	C4orf34	hg19_refFlat_C8orf44:range=chr8:67589944-675921895'pad=0,hg19_refFlat_C8orf44:range=chr8:67589944-675921895'pad=0 3'pad=0 strand=+ repeatMasking=none,-82.60chr4:39630760-39640481	NA	inter
CUST_11563_PI429285431	0.0372628	2.2354	lncRNA	lncipedia2.1	>lnc-USP35-8:1	chr11	79311266	79311663	+	NA	NA	NA	inter
CUST_40028_PI429285431	0.0138187	2.23427	lncRNA	NONCODERv3	>n407205|NR_026671|lncRNA|Homosapiens||RefGeneNoncode|NR_026671||1.8290900|-0.2775688	chr12	9906734	9907753	-	CD69	NA	chr12:9905082-9913497	inner
CUST_4938_PI429285431	0.0368502	2.23357	lncRNA	gencode_v17	>transcript_id "ENST00000555913.1" | genecode_v17	chr14	88277326	88278115	+	NA	NA	NA	inter
CUST_17844_PI429285431	0.00396975	2.2324	lncRNA	lncipedia2.1	>lnc-SCCPDH-1:2	chr1	246943686	246945374	+	LOC100130097	NA	chr1:246935180-246948062	inter
CUST_27113_PI429285431	0.0469281	2.22746	lncRNA	NONCODERv3	>n324226|NULL|mRNAlikelncRNA|Homosapiens|vegalncRNA|GENCODE|OTTHUMT00000326474|http://vega.sanger.ac.uk/Homo_sapiens/Transcript/Summary?db=core;t=OTTHUMT00000326474|-1.0312600|-0.4054524	chr7	20304441	20304816	+	NA	hg19_refFlat_ZNF714:range=chr19:21281075-213011355'pad=0,hg19_refFlat_ZNF714:range=chr19:21281075-213011355'pad=0 3'pad=0 strand=+ repeatMasking=none,-64.50;hg19_refFlat_PKP2:range=chr12:32945358-330496655'pad=0,hg19_refFlat_PKP2:range=chr12:32945358-330496655'pad=0 3'pad=0 strand=- repeatMasking=none,-67.10	NA	inter
CUST_3040_PI429285431	0.0251433	2.22711	lncRNA	gencode_v17	>transcript_id "ENST00000519996.1" | genecode_v17	chr8	21155750	21157382	+	NA	NA	NA	inter
CUST_13137_PI429285431	0.00332056	2.22519	lncRNA	lncipedia2.1	>lnc-GALM-2:1	chr2	38673435	38673932	+	NA	NA	NA	inter
LNCA_21_P0002496	0.00151886	2.22441	lncRNA	Agilent_HUMAN_G3V2	TCONS_00004419	chr2	118966988	118967047	-	NA	NA	NA	Unknown
CUST_2631_PI429285431	0.0144033	2.22392	lncRNA	gencode_v17	>transcript_id "ENST00000452888.1" | genecode_v17	chr6	134957627	134957996	+	NA	NA	NA	inter
CUST_15401_PI429285431	0.0142215	2.22272	lncRNA	lncipedia2.1	>lnc-FOXG1-6:10	chr14	27133246	27133784	+	NA	NA	NA	inter
LNCA_21_P0006169	0.00418959	2.22107	lncRNA	Agilent_HUMAN_G3V2	XR_108969	chr9	89563615	89563674	+	NA	NA	NA	Unknown
CUST_35188_PI429285431	0.0232317	2.22093	lncRNA	NONCODERv3	>n342168|BC029474|mRNAlikelncRNA|Homosapiens|HumanlncRNA|JounralRNA|4655|NULL|-1.2074700|-0.4708967	chr6	163894451	163895219	+	QKI	NA	chr6:163884451-163905192	inner
CUST_19008_PI429285431	0.0197439	2.21893	lncRNA	lncipedia2.1	>lnc-BTBD17-3:3	chr17	72209352	72209887	-	TTYH2	NA	chr17:72209696-72219447	inter
CUST_43117_PI429285431	0.00954305	2.21843	lncRNA	ensembl.GRCh37.72	>ENST00000592032 havana:3prime_overlapping_ncrna chromosome:GRCh37:18:54695063:54706076:1 gene:ENSG00000267225 gene_biotype:3prime_overlapping_ncrna transcript_biotype:3prime_overlapping_ncrna	chr18	54695063	54695627	+	WDR7	NA	chr18:54685063-54697036	inner
CUST_37045_PI429285431	0.0391157	2.21687	lncRNA	NONCODERv3	>n345499|NULL|lincRNA|Homosapiens|HumanlincRNA|ScriptureReconstructionLincRNAsByLuo[unpublished]|linc_luo_1048|NULL|-1.3932600|-0.4523344	chr2	62503073	62504230	-	NA	hg19_refFlat_MRPL10:range=chr17:45901571-459065865'pad=0,hg19_refFlat_MRPL10:range=chr17:45901571-459065865'pad=0 3'pad=0 strand=- repeatMasking=none,-72.60;hg19_refFlat_ASCC1:range=chr10:73862127-739730565'pad=0,hg19_refFlat_ASCC1:range=chr10:73862127-739730565'pad=0 3'pad=0 strand=- repeatMasking=none,-75.30;hg19_refFlat_BTG3:range=chr21:18966411-189814625'pad=0,hg19_refFlat_BTG3:range=chr21:18…	NA	inter
CUST_6169_PI429285431	0.0451621	2.2165	lncRNA	gencode_v17	>transcript_id "ENST00000591199.1" | genecode_v17	chr18	39766635	39767670	+	NA	NA	NA	inter
CUST_11997_PI429285431	0.0376517	2.21327	lncRNA	lncipedia2.1	>lnc-LAPTM4A-1:1	chr2	20254046	20254580	-	LAPTM4A	NA	chr2:20244046-20251789	inter
CUST_37432_PI429285431	0.0431374	2.21249	lncRNA	NONCODERv3	>n345884|NULL|lincRNA|Homosapiens|HumanlincRNA|ScriptureReconstructionLincRNAsByLuo[unpublished]|linc_luo_1433|NULL|-1.3161500|-0.2166684	chr20	45085823	45086704	-	NA	NA	NA	inter
CUST_2487_PI429285431	0.0184054	2.21232	lncRNA	gencode_v17	>transcript_id "ENST00000443504.1" | genecode_v17	chr6	19290550	19290930	-	NA	NA	NA	inter
LNCA_21_P0010825	0.00521301	2.21138	lncRNA	Agilent_HUMAN_G3V2	ENST00000427229	chr10	45643355	45643414	+	NA	NA	NA	Unknown
LNCA_21_P0009361	0.00120404	2.21067	lncRNA	Agilent_HUMAN_G3V2	TCONS_00025761	chr17	71943065	71943124	-	NA	NA	NA	Unknown
CUST_51503_PI429285431	0.00892284	2.21066	lncRNA	UCSC	>hg19_lincRNAsTranscripts_TCONS_l2_00010286 range=chr16:75538524-75539214 5'pad=0 3'pad=0 strand=- repeatMasking=none	chr16	75538524	75538846	-	CHST6	NA	chr16:75528524-75528926	inter
CUST_16742_PI429285431	0.0145755	2.21063	lncRNA	lncipedia2.1	>lnc-RBMY1J-1:2	chrY	24587492	24587961	+	NA	NA	NA	inter
CUST_27232_PI429285431	0.0236585	2.20844	lncRNA	NONCODERv3	>n324368|NULL|mRNAlikelncRNA|Homosapiens|vegalncRNA|GENCODE|OTTHUMT00000042462|http://vega.sanger.ac.uk/Homo_sapiens/Transcript/Summary?db=core;t=OTTHUMT00000042462|-0.8456880|-0.2736486	chr6	139670511	139671001	-	NA	NA	NA	inter
CUST_16769_PI429285431	0.0116215	2.20556	lncRNA	lncipedia2.1	>lnc-MED10-1:1	chr5	6362500	6362730	-	MED10	NA	chr5:6372039-6372527	inter
CUST_47422_PI429285431	0.0304819	2.20483	lncRNA	ncbi	>gi|223972655|ref|NR_026943.1| Homo sapiens uncharacterized LOC642852 (LOC642852), non-coding RNA	Chr21	46710967	46713966	+	NA	NA	NA	inter
CUST_41460_PI429285431	0.00517044	2.20368	lncRNA	ensembl.GRCh37.72	>ENST00000401264 ncrna:miRNA chromosome:GRCh37:10:105807847:105807944:-1 gene:ENSG00000216083 gene_biotype:miRNA transcript_biotype:miRNA	chr10	105807847	105807944	-	COL17A1	NA	chr10:105797847-105817944	inter
CUST_7141_PI429285431	0.0265782	2.20342	lncRNA	gencode_v17	>transcript_id "ENST00000452889.1" | genecode_v17	chrY	9748407	9748918	+	NA	NA	NA	inter
CUST_48778_PI429285431	0.0412161	2.20251	lncRNA	UCSC	>hg19_lincRNAsTranscripts_TCONS_l2_00015573 range=chr2:201560457-201565095 5'pad=0 3'pad=0 strand=+ repeatMasking=none	chr2	201560457	201561176	+	NA	NA	NA	inter
LNCA_21_P0006037	0.0230204	2.20227	lncRNA	Agilent_HUMAN_G3V2	ENST00000425157	chr9	106015393	106015452	+	NA	NA	NA	Unknown
LNCA_21_P0010641	0.01127	2.20105	lncRNA	Agilent_HUMAN_G3V2	ENST00000430107	chr1	117008881	117008940	-	NA	NA	NA	Unknown
CUST_28386_PI429285431	0.0325291	2.20047	lncRNA	NONCODERv3	>n325701|NULL|mRNAlikelncRNA|Homosapiens|vegalncRNA|GENCODE|OTTHUMT00000045227|http://vega.sanger.ac.uk/Homo_sapiens/Transcript/Summary?db=core;t=OTTHUMT00000045227|-1.1899000|-0.3489991	chr13	68694478	68695294	+	NA	NA	NA	inter
CUST_30408_PI429285431	0.0494655	2.1984	lncRNA	NONCODERv3	>n335537|BC070230|mRNAlikelncRNA|Homosapiens|NULL|H-invitationalv7.5|HIT000264188_06|http://h-invitational.jp/hinv/spsoup/transcript_view?hit_id=HIT000264188_06|-0.9623200|-0.1519176	chr6	4521175	4521458	+	NA	hg19_refFlat_C8orf44:range=chr8:67589944-675921895'pad=0,hg19_refFlat_C8orf44:range=chr8:67589944-675921895'pad=0 3'pad=0 strand=+ repeatMasking=none,-60.50;hg19_refFlat_ZNF714:range=chr19:21281075-213011355'pad=0,hg19_refFlat_ZNF714:range=chr19:21281075-213011355'pad=0 3'pad=0 strand=+ repeatMasking=none,-61.20	NA	inter
CUST_8982_PI429285431	0.022949	2.1971	lncRNA	lncipedia2.1	>lnc-MRPL41-1:1	chr9	140457338	140459768	+	PNPLA7	hg19_refFlat_ZNF701:range=chr19:53075495-530867105'pad=0,hg19_refFlat_ZNF701:range=chr19:53075495-530867105'pad=0 3'pad=0 strand=+ repeatMasking=none,-87.00;hg19_refFlat_CC2D2A:range=chr4:15477557-154829095'pad=0,hg19_refFlat_CC2D2A:range=chr4:15477557-154829095'pad=0 3'pad=0 strand=+ repeatMasking=none,-76.30;hg19_refFlat_DISC1:range=chr1:231762614-2321725775'pad=0,hg19_refFlat_DISC1:range=chr1:…	NA	inner
CUST_17548_PI429285431	0.0159763	2.19666	lncRNA	lncipedia2.1	>lnc-ADAMTS9-3:2	chr3	64961778	64962211	-	NA	NA	NA	inter
CUST_12273_PI429285431	0.0156048	2.19557	lncRNA	lncipedia2.1	>lnc-LYPD6-2:2	chr2	150704423	150704869	+	NA	NA	NA	inter
CUST_8880_PI429285431	0.0141223	2.19551	lncRNA	lncipedia2.1	>lnc-SCAMP5-1:1	chr15	75247946	75249943	+	RPP25	hg19_refFlat_RPP25:range=chr15:75248325-752489245'pad=0,hg19_refFlat_RPP25:range=chr15:75248325-752489245'pad=0 3'pad=0 strand=- repeatMasking=none,-112.30chr15:75247443-75249775	NA	inner
CUST_16947_PI429285431	0.00075872	2.19461	lncRNA	lncipedia2.1	>lnc-PREPL-1:1	chr2	44476340	44477094	-	NA	hg19_refFlat_PKP2:range=chr12:32945358-330496655'pad=0,hg19_refFlat_PKP2:range=chr12:32945358-330496655'pad=0 3'pad=0 strand=- repeatMasking=none,-81.80;hg19_refFlat_ADAMTS2:range=chr5:178578130-1787723295'pad=0,hg19_refFlat_ADAMTS2:range=chr5:178578130-1787723295'pad=0 3'pad=0 strand=- repeatMasking=none,-76.50;hg19_refFlat_TSFM:range=chr12:58176585-581903665'pad=0,hg19_refFlat_TSFM:range=chr12:…	NA	inter
LNCA_21_P0009331	0.0229955	2.19456	lncRNA	Agilent_HUMAN_G3V2	ENST00000508851	chr17	48358988	48359047	-	NA	NA	NA	Unknown
CUST_32002_PI429285431	0.0381899	2.19425	lncRNA	NONCODERv3	>n338563|AK095015|mRNAlikelncRNA|Homosapiens|HumanlncRNA|JounralRNA|968|NULL|-1.0552400|-0.2610133	chr1	234666767	234669620	+	NA	NA	NA	inter
CUST_4118_PI429285431	0.0466403	2.19337	lncRNA	gencode_v17	>transcript_id "ENST00000441665.1" | genecode_v17	chr11	131056917	131057551	+	NA	NA	NA	inter
CUST_49205_PI429285431	0.0242521	2.19234	lncRNA	UCSC	>hg19_lincRNAsTranscripts_TCONS_l2_00020853 range=chr4:161730282-161740018 5'pad=0 3'pad=0 strand=+ repeatMasking=none	chr4	161730282	161730809	+	NA	NA	NA	inter
LNCA_21_P0002228	0.00774562	2.19211	lncRNA	Agilent_HUMAN_G3V2	TCONS_00003713	chr2	65265474	65265533	+	NA	NA	NA	Unknown
LNCA_21_P0012062	0.000112705	2.18991	lncRNA	Agilent_HUMAN_G3V2	ENST00000414796	chr2	35223391	35223450	-	NA	NA	NA	Unknown
LNCA_21_P0014728	0.0038761	2.18762	lncRNA	Agilent_HUMAN_G3V2	XR_112912	chr6	133756215	133756274	-	NA	NA	NA	Unknown
CUST_10193_PI429285431	0.0239126	2.18757	lncRNA	lncipedia2.1	>lnc-CTD-2144E22.5.1-7:1	chr16	34686182	34686926	+	NA	NA	NA	inter
LNCA_21_P0008528	0.00462614	2.18564	lncRNA	Agilent_HUMAN_G3V2	TCONS_00023071	chr14	24195183	24195242	-	NA	NA	NA	Unknown
CUST_35567_PI429285431	0.0408682	2.18277	lncRNA	NONCODERv3	>n342697|BC023982|mRNAlikelncRNA|Homosapiens|HumanlncRNA|JounralRNA|5199|NULL|-0.8963390|-0.2517975	chr5	139554735	139555589	+	C5orf32	NA	chr5:139554653-139623374	inner
CUST_26484_PI429285431	0.0335397	2.17919	lncRNA	lncipedia2.1	>lnc-CALCOCO1-2:1	chr12	54333255	54334662	-	HOXC13	hg19_refFlat_HOXC13:range=chr12:54332691-543390405'pad=0,hg19_refFlat_HOXC13:range=chr12:54332691-543390405'pad=0 3'pad=0 strand=+ repeatMasking=none,-101.90chr12:54332576-54340328	NA	inter
CUST_48182_PI429285431	0.0229069	2.17915	lncRNA	ncbi	>gi|310113961|ref|XR_112205.1| PREDICTED: Homo sapiens uncharacterized LOC100505727 (LOC100505727), misc_RNA	NA	NA	NA	NA	NA	NA	NA	Unknown
CUST_17743_PI429285431	0.0377887	2.17904	lncRNA	lncipedia2.1	>lnc-TTC34-3:8	chr1	2977671	2978126	-	PRDM16	NA	chr1:2985742-2987962	inter
CUST_25831_PI429285431	0.0429759	2.17882	lncRNA	lncipedia2.1	>lnc-FANCL-3:4	chr2	59615197	59615663	-	NA	NA	NA	inter
CUST_17177_PI429285431	0.0480661	2.17725	lncRNA	lncipedia2.1	>lnc-JPH4-1:8	chr14	24198787	24199944	-	NA	NA	NA	inter
CUST_20545_PI429285431	0.0404245	2.17672	lncRNA	lncipedia2.1	>lnc-NUB1-2:1	chr7	151135917	151136480	+	CRYGN	NA	chr7:151127056-151137099	inner
LNCA_21_P0002469	0.00017219	2.17523	lncRNA	Agilent_HUMAN_G3V2	TCONS_00004324	chr2	85958827	85967302	-	NA	NA	NA	Unknown
CUST_17124_PI429285431	0.000501253	2.17503	lncRNA	lncipedia2.1	>lnc-CSGALNACT1-2:1	chr8	19782569	19782881	-	NA	hg19_refFlat_CAGE1:range=chr6:7329398-73874065'pad=0,hg19_refFlat_CAGE1:range=chr6:7329398-73874065'pad=0 3'pad=0 strand=- repeatMasking=none,-80.80;hg19_refFlat_BIRC5:range=chr17:76210398-762196355'pad=0,hg19_refFlat_BIRC5:range=chr17:76210398-762196355'pad=0 3'pad=0 strand=+ repeatMasking=none,-75.90;hg19_refFlat_ISY1:range=chr3:128848924-1288798185'pad=0,hg19_refFlat_ISY1:range=chr3:128848924-…	NA	inter
LNCA_21_P0013803	0.00549403	2.17502	lncRNA	Agilent_HUMAN_G3V2	TCONS_l2_00030417	chrX	281496	281555	-	NA	NA	NA	Unknown
CUST_10482_PI429285431	0.0499607	2.17324	lncRNA	lncipedia2.1	>lnc-TFCP2L1-1:1	chr2	121896725	121896966	-	NA	NA	NA	inter
CUST_40720_PI429285431	0.0177256	2.17323	lncRNA	NONCODERv3	>n410286|NR_037177_7|lncRNA|Homosapiens||RefGeneNoncode|NR_037177_7||-0.8256220|-0.3295413	chr6	4309476	4310165	+	NA	NA	NA	inter
LNCA_19_P00328996	0.00162721	2.17296	lncRNA	Agilent_HUMAN_G3V2	AK057050	chr9	132267364	132267423	+	NA	NA	NA	Unknown
CUST_2548_PI429285431	0.000812265	2.1723	lncRNA	gencode_v17	>transcript_id "ENST00000445346.1" | genecode_v17	chr6	68936864	68937537	-	NA	NA	NA	inter
CUST_18048_PI429285431	0.00864858	2.17153	lncRNA	lncipedia2.1	>lnc-RGL4-4:4	chr22	23857168	23858047	+	NA	NA	NA	inter
CUST_12685_PI429285431	0.00306501	2.17021	lncRNA	lncipedia2.1	>lnc-C5orf38-1:3	chr5	2918788	2919030	+	NA	NA	NA	inter
CUST_3396_PI429285431	0.0435904	2.16976	lncRNA	gencode_v17	>transcript_id "ENST00000422554.2" | genecode_v17	chr9	38360424	38360822	+	NA	NA	NA	inter
CUST_40464_PI429285431	0.0273094	2.16916	lncRNA	NONCODERv3	>n409391|NR_033781|lncRNA|Homosapiens||RefGeneNoncode|NR_033781||3.8519800|-0.2446254	chr1	120106502	120109501	+	NA	NA	NA	inter
CUST_6964_PI429285431	0.00658908	2.16808	lncRNA	gencode_v17	>transcript_id "ENST00000449126.1" | genecode_v17	chr22	27672201	27672474	+	NA	NA	NA	inter
CUST_16041_PI429285431	0.000293501	2.16792	lncRNA	lncipedia2.1	>lnc-CTD-2144E22.5.1-1:1	chr16	34266742	34267499	+	NA	NA	NA	inter
CUST_27394_PI429285431	0.0243862	2.16682	lncRNA	NONCODERv3	>n324558|NULL|mRNAlikelncRNA|Homosapiens|vegalncRNA|GENCODE|OTTHUMT00000043560|http://vega.sanger.ac.uk/Homo_sapiens/Transcript/Summary?db=core;t=OTTHUMT00000043560|0.5915330|-0.2754426	chr6	28724041	28724577	-	NA	hg19_refFlat_PKP2:range=chr12:32945358-330496655'pad=0,hg19_refFlat_PKP2:range=chr12:32945358-330496655'pad=0 3'pad=0 strand=- repeatMasking=none,-85.70;hg19_refFlat_SEPP1:range=chr5:42800822-428108695'pad=0,hg19_refFlat_SEPP1:range=chr5:42800822-428108695'pad=0 3'pad=0 strand=- repeatMasking=none,-79.60;hg19_refFlat_BIRC5:range=chr17:76210398-762196355'pad=0,hg19_refFlat_BIRC5:range=chr17:762103…	NA	inter
LNCA_21_P0009779	0.000430443	2.16674	lncRNA	Agilent_HUMAN_G3V2	THC2570509	chr19	58918637	58918696	-	NA	NA	NA	Unknown
LNCA_21_P0002329	0.0486807	2.16582	lncRNA	Agilent_HUMAN_G3V2	TCONS_00003965	chr2	186084576	186084635	+	NA	NA	NA	Unknown
LNCA_21_P0009544	0.00459539	2.16342	lncRNA	Agilent_HUMAN_G3V2	TCONS_00026486	chr18	33025517	33025576	-	NA	NA	NA	Unknown
CUST_41542_PI429285431	0.0464301	2.16151	lncRNA	ensembl.GRCh37.72	>ENST00000390756 ncrna:miRNA chromosome:GRCh37:4:29751818:29751932:1 gene:ENSG00000212045 gene_biotype:miRNA transcript_biotype:miRNA	chr4	29751818	29751932	+	NA	NA	NA	inter
LNCA_21_P0014828	0.0210847	2.16118	lncRNA	Agilent_HUMAN_G3V2	XR_132678	chr22	20229945	20230004	+	NA	NA	NA	Unknown
CUST_40029_PI429285431	0.0214237	2.15822	lncRNA	NONCODERv3	>n407206|NR_026672|lncRNA|Homosapiens||RefGeneNoncode|NR_026672||1.5625200|-0.2744780	chr12	9907163	9908124	-	CD69	NA	chr12:9905082-9913497	inner
CUST_47606_PI429285431	0.00891492	2.15807	lncRNA	ncbi	>gi|383087740|ref|NR_001564.2| Homo sapiens X (inactive)-specific transcript (non-protein coding) (XIST), non-coding RNA	ChrX	73046486	73049485	-	NA	hg19_refFlat_ZNF195:range=chr11:3380348-34002705'pad=0,hg19_refFlat_ZNF195:range=chr11:3380348-34002705'pad=0 3'pad=0 strand=- repeatMasking=none,-83.90;hg19_refFlat_GDPD2:range=chrX:69644835-696529365'pad=0,hg19_refFlat_GDPD2:range=chrX:69644835-696529365'pad=0 3'pad=0 strand=+ repeatMasking=none,-81.50;hg19_refFlat_MYL10:range=chr7:101256755-1012723985'pad=0,hg19_refFlat_MYL10:range=chr7:101256…	NA	inter
CUST_48789_PI429285431	0.00103446	2.1558	lncRNA	UCSC	>hg19_lincRNAsTranscripts_TCONS_l2_00014249 range=chr2:220361189-220361705 5'pad=0 3'pad=0 strand=+ repeatMasking=none	chr2	220361189	220361411	+	SPEG	NA	chr2:220351189-220358354	inter
LNCA_33_P3330428	0.0267768	2.15199	lncRNA	Agilent_HUMAN_G3V2	ENST00000370795	chr20	60808451	60808510	+	NA	NA	NA	Unknown
CUST_17283_PI429285431	0.0325788	2.14901	lncRNA	lncipedia2.1	>lnc-ZNF516-7:1	chr18	73839009	73839241	-	NA	NA	NA	inter
CUST_19244_PI429285431	0.00115279	2.14804	lncRNA	lncipedia2.1	>lnc-AGRP-2:1	chr16	67573948	67574477	-	FAM65A	hg19_refFlat_FAM65A:range=chr16:67563726-675803665'pad=0,hg19_refFlat_FAM65A:range=chr16:67563726-675803665'pad=0 3'pad=0 strand=+ repeatMasking=none,-108.90;hg19_refFlat_FAM65A:range=chr16:67571482-675803665'pad=0,hg19_refFlat_FAM65A:range=chr16:67571482-675803665'pad=0 3'pad=0 strand=+ repeatMasking=none,-108.90;hg19_refFlat_FAM65A:range=chr16:67572350-675803665'pad=0,hg19_refFlat_FAM65A:range=…	NA	inner
CUST_675_PI429285431	0.0113611	2.14776	lncRNA	gencode_v17	>transcript_id "ENST00000425125.1" | genecode_v17	chr2	6453086	6453664	-	NA	NA	NA	inter
CUST_11499_PI429285431	0.0304745	2.14679	lncRNA	lncipedia2.1	>lnc-PHF10-1:2	chr6	170125513	170126802	-	PHF10	NA	chr6:170115513-170124106	inter
CUST_46244_PI429285431	0.0403286	2.14579	lncRNA	ncbi	>gi|390608666|ref|NR_047001.1| Homo sapiens POU4F1 antisense RNA 1 (POU4F1-AS1), non-coding RNA	Chr13	78628990	78631407	+	NA	hg19_refFlat_RNF219:range=chr13:79189715-792332555'pad=0,hg19_refFlat_RNF219:range=chr13:79189715-792332555'pad=0 3'pad=0 strand=- repeatMasking=none,-89.10	NA	inter
LNCA_21_P0002434	0.000607653	2.14547	lncRNA	Agilent_HUMAN_G3V2	TCONS_00004236	chr2	44475487	44476348	-	NA	NA	NA	Unknown
CUST_3872_PI429285431	0.0138826	2.14463	lncRNA	gencode_v17	>transcript_id "ENST00000529082.1" | genecode_v17	chr11	19321549	19321970	+	NA	NA	NA	inter
LNCA_21_P0014501	0.00140514	2.14271	lncRNA	Agilent_HUMAN_G3V2	XR_110115	chr13	36273079	36273138	+	NA	NA	NA	Unknown
CUST_346_PI429285431	0.00673299	2.14023	lncRNA	gencode_v17	>transcript_id "ENST00000435253.2" | genecode_v17	chr1	106144774	106146622	-	NA	hg19_refFlat_CYB561D1:range=chr1:110036762-1100384895'pad=0,hg19_refFlat_CYB561D1:range=chr1:110036762-1100384895'pad=0 3'pad=0 strand=+ repeatMasking=none,-81.40;hg19_refFlat_C8orf44:range=chr8:67589944-675921895'pad=0,hg19_refFlat_C8orf44:range=chr8:67589944-675921895'pad=0 3'pad=0 strand=+ repeatMasking=none,-88.80;hg19_refFlat_ISY1:range=chr3:128848924-1288798185'pad=0,hg19_refFlat_ISY1:range…	NA	inter
CUST_49151_PI429285431	0.013481	2.13826	lncRNA	UCSC	>hg19_lincRNAsTranscripts_TCONS_l2_00020732 range=chr4:121249569-121288829 5'pad=0 3'pad=0 strand=+ repeatMasking=none	chr4	121249569	121249852	+	NA	NA	NA	inter
LNCA_21_P0007286	0.0079494	2.13667	lncRNA	Agilent_HUMAN_G3V2	TCONS_00019503	chr11	119898221	119898280	+	NA	NA	NA	Unknown
CUST_15958_PI429285431	0.0274352	2.13507	lncRNA	lncipedia2.1	>lnc-POLR2B-2:2	chr4	58293471	58294052	+	NA	NA	NA	inter
LNCA_21_P0008751	0.0215572	2.13497	lncRNA	Agilent_HUMAN_G3V2	TCONS_00023714	chr15	68777372	68777431	-	NA	NA	NA	Unknown
CUST_37656_PI429285431	0.00797259	2.13416	lncRNA	NONCODERv3	>n346137|NULL|lincRNA|Homosapiens|HumanlincRNA|ScriptureReconstructionLincRNAsByLuo[unpublished]|linc_luo_1687|NULL|-1.5751200|-0.2200918	chr6	27327619	27329312	-	NA	NA	NA	inter
CUST_14128_PI429285431	0.0244585	2.13219	lncRNA	lncipedia2.1	>lnc-VAPA-1:1	chr18	10020559	10020890	+	NA	NA	NA	inter
CUST_17680_PI429285431	0.0174737	2.13198	lncRNA	lncipedia2.1	>lnc-AC027763.2.1-1:1	chr17	6923118	6923329	-	BCL6B	NA	chr17:6926369-6932961	inter
CUST_17355_PI429285431	0.0456336	2.13192	lncRNA	lncipedia2.1	>lnc-TNFAIP3-3:1	chr6	137995525	137996108	+	NA	NA	NA	inter
CUST_43079_PI429285431	0.00842829	2.12912	lncRNA	ensembl.GRCh37.72	>ENST00000408541 ncrna:snRNA chromosome:GRCh37:10:43837234:43837358:1 gene:ENSG00000221468 gene_biotype:snRNA transcript_biotype:snRNA	chr10	43837234	43837358	+	NA	NA	NA	inter
CUST_18664_PI429285431	0.00809807	2.12886	lncRNA	lncipedia2.1	>lnc-ATG7-2:1	chr3	11770020	11770429	+	VGLL4	NA	chr3:11760020-11762220	inter
CUST_32885_PI429285431	0.00178907	2.12849	lncRNA	NONCODERv3	>n339551|BC043572|mRNAlikelncRNA|Homosapiens|HumanlncRNA|JounralRNA|1993|NULL|-0.6737620|-0.2954289	chr3	131043935	131046033	-	NEK11	NA	chr3:131033935-131069309	inter
CUST_33517_PI429285431	0.0394173	2.12654	lncRNA	NONCODERv3	>n340254|BX537573|mRNAlikelncRNA|Homosapiens|HumanlncRNA|JounralRNA|2715|NULL|-0.8829010|-0.3407828	chr4	148407980	148410979	+	EDNRA	NA	chr4:148397980-148423807	inter
CUST_3538_PI429285431	0.017377	2.1261	lncRNA	gencode_v17	>transcript_id "ENST00000441473.1" | genecode_v17	chr9	128819859	128820174	+	NA	NA	NA	inter
CUST_43242_PI429285431	0.0253897	2.12545	lncRNA	ensembl.GRCh37.72	>ENST00000586051 havana:sense_intronic chromosome:GRCh37:19:11432832:11434871:1 gene:ENSG00000267576 gene_biotype:sense_intronic transcript_biotype:sense_intronic	chr19	11432832	11433737	+	TSPAN16	hg19_refFlat_AMBRA1:range=chr11:46419000-465699305'pad=0,hg19_refFlat_AMBRA1:range=chr11:46419000-465699305'pad=0 3'pad=0 strand=- repeatMasking=none,-38.75chr19:11422832-11437672	NA	inner
CUST_8783_PI429285431	0.0346726	2.12478	lncRNA	lncipedia2.1	>lnc-SPRY1-2:2	chr4	124851403	124852047	+	NA	NA	NA	inter
LNCA_21_P0010415	0.0222808	2.12452	lncRNA	Agilent_HUMAN_G3V2	TCONS_00029589	chr22	36784634	36784693	+	NA	NA	NA	Unknown
LNCA_21_P0004418	0.00015327	2.12448	lncRNA	Agilent_HUMAN_G3V2	TCONS_00010392	chr5	82146853	82146912	-	NA	NA	NA	Unknown
CUST_26044_PI429285431	0.00582032	2.12316	lncRNA	lncipedia2.1	>lnc-FAM174B-1:2	chr15	93139532	93139905	-	NA	NA	NA	inter
CUST_36130_PI429285431	0.0401832	2.12192	lncRNA	NONCODERv3	>n344703|NULL|lincRNA|Homosapiens|HumanlincRNA|ScriptureReconstructionLincRNAsByLuo[unpublished]|linc_luo_252|NULL|-1.2792600|-0.3596951	chr2	186903622	186905866	-	NA	hg19_refFlat_FAM122C:range=chrX:133941629-1339434035'pad=0,hg19_refFlat_FAM122C:range=chrX:133941629-1339434035'pad=0 3'pad=0 strand=+ repeatMasking=none,-75.00;hg19_refFlat_BTG3:range=chr21:18966411-189814625'pad=0,hg19_refFlat_BTG3:range=chr21:18966411-189814625'pad=0 3'pad=0 strand=- repeatMasking=none,-79.50;hg19_refFlat_LYRM4:range=chr6:5187029-52609665'pad=0,hg19_refFlat_LYRM4:range=chr6:51…	NA	inter
CUST_10208_PI429285431	0.00204648	2.12133	lncRNA	lncipedia2.1	>lnc-RP11-327F22.5.1-6:1	chr16	51558830	51559104	+	NA	NA	NA	inter
CUST_21612_PI429285431	0.0397435	2.12128	lncRNA	lncipedia2.1	>lnc-MYOM1-1:1	chr18	3261608	3262330	-	MYL12B	hg19_refFlat_MYL12B:range=chr18:3272897-32779355'pad=0,hg19_refFlat_MYL12B:range=chr18:3272897-32779355'pad=0 3'pad=0 strand=+ repeatMasking=none,-84.00;hg19_refFlat_MYL12A:range=chr18:3253246-32559165'pad=0,hg19_refFlat_MYL12A:range=chr18:3253246-32559165'pad=0 3'pad=0 strand=+ repeatMasking=none,-84.00chr18:3262111-3271848	NA	inter
LNCA_21_P0002557	0.0383189	2.12112	lncRNA	Agilent_HUMAN_G3V2	TCONS_00004629	chr2	241321434	241321493	-	NA	NA	NA	Unknown
CUST_1164_PI429285431	0.0395642	2.12033	lncRNA	gencode_v17	>transcript_id "ENST00000444567.1" | genecode_v17	chr2	176121978	176122458	+	NA	NA	NA	inter
CUST_5050_PI429285431	0.0302905	2.1187	lncRNA	gencode_v17	>transcript_id "ENST00000555882.1" | genecode_v17	chr14	102024890	102025678	-	DIO3	NA	chr14:102027688-102029789	inter
CUST_5010_PI429285431	0.0491199	2.11831	lncRNA	gencode_v17	>transcript_id "ENST00000522618.1" | genecode_v17	chr14	101302057	101303010	+	NA	NA	NA	inter
CUST_19761_PI429285431	0.0206307	2.11817	lncRNA	lncipedia2.1	>lnc-ZDHHC9-1:1	chrX	129091437	129091962	-	NA	NA	NA	inter
CUST_41044_PI429285431	0.0260216	2.117	lncRNA	NONCODERv3	>n411711|NR_044996_7|lncRNA|Homosapiens||RefGeneNoncode|NR_044996_7||-1.0266600|-0.1497913	chr6	3737843	3738458	+	C6orf145	NA	chr6:3727843-3751026	inner
CUST_25922_PI429285431	0.00427015	2.11689	lncRNA	lncipedia2.1	>lnc-C8A-1:1	chr1	57462308	57462917	+	DAB1	NA	chr1:57463579-57472430	inter
CUST_25825_PI429285431	0.03112	2.11662	lncRNA	lncipedia2.1	>lnc-C17orf48-2:7	chr17	10669996	10670604	+	NA	hg19_refFlat_TMEM220:range=chr17:10618770-106331685'pad=0,hg19_refFlat_TMEM220:range=chr17:10618770-106331685'pad=0 3'pad=0 strand=- repeatMasking=none,-98.90	NA	inter
CUST_9276_PI429285431	0.0194238	2.11642	lncRNA	lncipedia2.1	>lnc-UXS1-2:1	chr2	106545171	106545589	-	NA	NA	NA	inter
CUST_4318_PI429285431	0.0220949	2.11468	lncRNA	gencode_v17	>transcript_id "ENST00000544089.1" | genecode_v17	chr12	68738444	68738919	+	NA	NA	NA	inter
CUST_9826_PI429285431	0.0339087	2.11409	lncRNA	lncipedia2.1	>lnc-TMEM169-1:1	chr2	216777131	216777551	+	NA	NA	NA	inter
CUST_1717_PI429285431	0.0390251	2.11322	lncRNA	gencode_v17	>transcript_id "ENST00000506878.1" | genecode_v17	chr4	27135618	27136099	-	NA	NA	NA	inter
CUST_9228_PI429285431	0.0267358	2.11156	lncRNA	lncipedia2.1	>lnc-CALHM3-2:1	chr10	105410652	105412184	-	SH3PXD2A	hg19_refFlat_BIRC5:range=chr17:76210398-762196355'pad=0,hg19_refFlat_BIRC5:range=chr17:76210398-762196355'pad=0 3'pad=0 strand=+ repeatMasking=none,-90.20;hg19_refFlat_FBLIM1:range=chr1:16091479-161015265'pad=0,hg19_refFlat_FBLIM1:range=chr1:16091479-161015265'pad=0 3'pad=0 strand=+ repeatMasking=none,-94.10;hg19_refFlat_CYB561D1:range=chr1:110036762-1100383975'pad=0,hg19_refFlat_CYB561D1:range=c…	NA	inner
CUST_12571_PI429285431	0.00083589	2.11084	lncRNA	lncipedia2.1	>lnc-FRMD1-4:1	chr6	168200289	168200532	-	NA	NA	NA	inter
CUST_28628_PI429285431	0.0113785	2.11056	lncRNA	NONCODERv3	>n325997|NULL|mRNAlikelncRNA|Homosapiens|vegalncRNA|GENCODE|OTTHUMT00000047721|http://vega.sanger.ac.uk/Homo_sapiens/Transcript/Summary?db=core;t=OTTHUMT00000047721|-0.8078280|-0.1873729	chr10	43481121	43481582	+	NA	NA	NA	inter
CUST_48347_PI429285431	0.0429356	2.10666	lncRNA	UCSC	>hg19_lincRNAsTranscripts_TCONS_l2_00001274 range=chr1:65450881-65451399 5'pad=0 3'pad=0 strand=- repeatMasking=none	chr1	65450881	65451211	-	NA	NA	NA	inter
CUST_10713_PI429285431	0.00788045	2.10607	lncRNA	lncipedia2.1	>lnc-C2orf71-1:1	chr2	29320161	29320562	-	NA	NA	NA	inter
CUST_23254_PI429285431	0.00304576	2.10595	lncRNA	lncipedia2.1	>lnc-ALOX12B-2:1	chr17	7960890	7961406	-	ALOX15B	NA	chr17:7950890-7952452	inter
CUST_24365_PI429285431	0.0492108	2.10502	lncRNA	lncipedia2.1	>lnc-RHOB-2:1	chr2	20254046	20254618	+	LAPTM4A	NA	chr2:20244046-20251789	inter
CUST_33473_PI429285431	0.0477095	2.10427	lncRNA	NONCODERv3	>n340208|BC047115|mRNAlikelncRNA|Homosapiens|HumanlncRNA|JounralRNA|2669|NULL|-0.8581570|-0.3902005	chr4	121751723	121752484	-	PRDM5	NA	chr4:121741723-121762408	inner
CUST_9090_PI429285431	0.0130078	2.10255	lncRNA	lncipedia2.1	>lnc-ZNF484-1:1	chr9	95605657	95607654	-	ZNF484	hg19_refFlat_C9orf37:range=chr9:140510121-1405106515'pad=0,hg19_refFlat_C9orf37:range=chr9:140510121-1405106515'pad=0 3'pad=0 strand=- repeatMasking=none,-77.20;hg19_refFlat_PDLIM5:range=chr4:95376440-953777095'pad=0,hg19_refFlat_PDLIM5:range=chr4:95376440-953777095'pad=0 3'pad=0 strand=+ repeatMasking=none,-74.40;hg19_refFlat_PPIP5K1:range=chr15:43826872-438767025'pad=0,hg19_refFlat_PPIP5K1:rang…	NA	inter
CUST_1600_PI429285431	0.0482386	2.10227	lncRNA	gencode_v17	>transcript_id "ENST00000417384.1" | genecode_v17	chr3	187514043	187514631	+	NA	NA	NA	inter
CUST_48587_PI429285431	0.00281812	2.10126	lncRNA	UCSC	>hg19_lincRNAsTranscripts_TCONS_l2_00014464 range=chr2:20786003-20793177 5'pad=0 3'pad=0 strand=- repeatMasking=none	chr2	20786003	20789002	-	HS1BP3	hg19_refFlat_NEK4:range=chr3:52745793-528047625'pad=0,hg19_refFlat_NEK4:range=chr3:52745793-528047625'pad=0 3'pad=0 strand=- repeatMasking=none,-85.80;hg19_refFlat_ZMAT1:range=chrX:101138482-1011736065'pad=0,hg19_refFlat_ZMAT1:range=chrX:101138482-1011736065'pad=0 3'pad=0 strand=- repeatMasking=none,-79.00;hg19_refFlat_DISC1:range=chr1:231762614-2321725775'pad=0,hg19_refFlat_DISC1:range=chr1:2317…	NA	inter
CUST_30931_PI429285431	0.0112388	2.10113	lncRNA	NONCODERv3	>n336990|BC111365|mRNAlikelncRNA|Homosapiens|NULL|H-invitationalv7.5|HIT000339893|http://h-invitational.jp/hinv/spsoup/transcript_view?hit_id=HIT000339893|-1.0702300|-0.0643744	chr8	55370539	55371184	-	LOC100129098	hg19_refFlat_SOX17:range=chr8:55370699-553725555'pad=0,hg19_refFlat_SOX17:range=chr8:55370699-553725555'pad=0 3'pad=0 strand=+ repeatMasking=none,-109.10;hg19_refFlat_SOX18:range=chr20:62679519-626808695'pad=0,hg19_refFlat_SOX18:range=chr20:62679519-626808695'pad=0 3'pad=0 strand=- repeatMasking=none,-84.10chr8:55378154-55381798	NA	inner
CUST_6101_PI429285431	0.0381598	2.10009	lncRNA	gencode_v17	>transcript_id "ENST00000580967.1" | genecode_v17	chr18	14971496	14973278	+	NA	hg19_refFlat_ZNF429:range=chr19:21688574-217208805'pad=0,hg19_refFlat_ZNF429:range=chr19:21688574-217208805'pad=0 3'pad=0 strand=+ repeatMasking=none,-73.10;hg19_refFlat_ISY1:range=chr3:128848924-1288798185'pad=0,hg19_refFlat_ISY1:range=chr3:128848924-1288798185'pad=0 3'pad=0 strand=- repeatMasking=none,-80.90;hg19_refFlat_JAM2:range=chr21:27012134-270866175'pad=0,hg19_refFlat_JAM2:range=chr21:27…	NA	inter
CUST_9410_PI429285431	0.0361901	2.09949	lncRNA	lncipedia2.1	>lnc-KLF15-2:1	chr3	126019522	126021848	-	LOC644662	hg19_refFlat_ISY1:range=chr3:128848924-1288798185'pad=0,hg19_refFlat_ISY1:range=chr3:128848924-1288798185'pad=0 3'pad=0 strand=- repeatMasking=none,-76.80chr3:126009522-126010368	NA	inter
LNCA_21_P0006490	0.00311464	2.09889	lncRNA	Agilent_HUMAN_G3V2	TCONS_00017155	chrX	39681476	39681758	+	NA	NA	NA	Unknown
CUST_13384_PI429285431	0.00562608	2.09866	lncRNA	lncipedia2.1	>lnc-UQCRFS1-9:14	chr19	28284440	28285919	-	NA	NA	NA	inter
CUST_33451_PI429285431	0.0217469	2.09833	lncRNA	NONCODERv3	>n340186|AK127031|mRNAlikelncRNA|Homosapiens|HumanlncRNA|JounralRNA|2647|NULL|-1.0542600|-0.3510595	chr4	99580054	99583053	+	TSPAN5	NA	chr4:99570054-99579812	inter
CUST_29044_PI429285431	0.0245458	2.09697	lncRNA	NONCODERv3	>n326534|NULL|mRNAlikelncRNA|Homosapiens|vegalncRNA|GENCODE|OTTHUMT00000029425|http://vega.sanger.ac.uk/Homo_sapiens/Transcript/Summary?db=core;t=OTTHUMT00000029425|-1.2515200|-0.2219780	chr1	90193812	90194409	-	LRRC8C	NA	chr1:90183812-90185094	inter
CUST_11693_PI429285431	0.0192319	2.09593	lncRNA	lncipedia2.1	>lnc-PDE5A-2:1	chr4	120725607	120726082	-	NA	NA	NA	inter
CUST_33574_PI429285431	0.0305399	2.09533	lncRNA	NONCODERv3	>n340326|AF056451|mRNAlikelncRNA|Homosapiens|HumanlncRNA|JounralRNA|2787|NULL|-1.0637700|-0.3558787	chr5	8980515	8980770	-	NA	NA	NA	inter
CUST_33036_PI429285431	0.0040998	2.09515	lncRNA	NONCODERv3	>n339723|BC047656|mRNAlikelncRNA|Homosapiens|HumanlncRNA|JounralRNA|2168|NULL|0.4774370|-0.1907181	chr20	55841852	55843030	+	BMP7	hg19_refFlat_TCTN1:range=chr12:111051988-1110856975'pad=0,hg19_refFlat_TCTN1:range=chr12:111051988-1110856975'pad=0 3'pad=0 strand=+ repeatMasking=none,-57.60chr20:55831852-55841707	NA	inter
CUST_15948_PI429285431	0.0240288	2.09426	lncRNA	lncipedia2.1	>lnc-SH3GL3-1:1	chr15	84302146	84302620	+	NA	NA	NA	inter
CUST_50508_PI429285431	0.00783862	2.09416	lncRNA	UCSC	>hg19_lincRNAsTranscripts_TCONS_l2_00030581 range=chrX:118011939-118012717 5'pad=0 3'pad=0 strand=- repeatMasking=none	chrX	118011939	118012379	-	NA	NA	NA	inter
CUST_13483_PI429285431	0.0130583	2.09288	lncRNA	lncipedia2.1	>lnc-RP11-1070N10.3.1-1:3	chr14	95795780	95796629	+	CLMN	NA	chr14:95785780-95786245	inter
LNCA_21_P0003567	0.000678564	2.08974	lncRNA	Agilent_HUMAN_G3V2	TCONS_00007975	chr4	8323735	8323794	+	NA	NA	NA	Unknown
CUST_4113_PI429285431	0.0440948	2.08951	lncRNA	gencode_v17	>transcript_id "ENST00000602376.1" | genecode_v17	chr11	130184888	130185318	+	ZBTB44	NA	chr11:130174888-130184607	inter
CUST_9133_PI429285431	0.000419089	2.0879	lncRNA	lncipedia2.1	>lnc-DRGX-1:1	chr10	50534758	50536863	-	C10orf71	hg19_refFlat_C10orf71:range=chr10:50530591-505350615'pad=0,hg19_refFlat_C10orf71:range=chr10:50530591-505350615'pad=0 3'pad=0 strand=+ repeatMasking=none,-93.40;hg19_refFlat_C10orf71:range=chr10:50530591-505348985'pad=0,hg19_refFlat_C10orf71:range=chr10:50530591-505348985'pad=0 3'pad=0 strand=+ repeatMasking=none,-100.00chr10:50524758-50535537	NA	inner
LNCA_21_P0008266	0.0047552	2.08677	lncRNA	Agilent_HUMAN_G3V2	TCONS_00022316	chr13	112837189	112837248	-	NA	NA	NA	Unknown
LNCA_21_P0013002	0.0307835	2.08672	lncRNA	Agilent_HUMAN_G3V2	TCONS_l2_00023847	chr5	102779415	102779474	-	NA	NA	NA	Unknown
CUST_28456_PI429285431	0.00256929	2.084	lncRNA	NONCODERv3	>n325784|NULL|mRNAlikelncRNA|Homosapiens|vegalncRNA|GENCODE|OTTHUMT00000125972|http://vega.sanger.ac.uk/Homo_sapiens/Transcript/Summary?db=core;t=OTTHUMT00000125972|2.0091200|-0.3702906	chr13	29630022	29630873	-	MTUS2	hg19_refFlat_ISY1:range=chr3:128848924-1288798185'pad=0,hg19_refFlat_ISY1:range=chr3:128848924-1288798185'pad=0 3'pad=0 strand=- repeatMasking=none,-82.70;hg19_refFlat_ZNF829:range=chr19:37382394-374068565'pad=0,hg19_refFlat_ZNF829:range=chr19:37382394-374068565'pad=0 3'pad=0 strand=- repeatMasking=none,-65.50;hg19_refFlat_BIRC5:range=chr17:76210398-762196355'pad=0,hg19_refFlat_BIRC5:range=chr17:…	NA	inner
CUST_37125_PI429285431	0.0363501	2.08367	lncRNA	NONCODERv3	>n345566|NULL|lincRNA|Homosapiens|HumanlincRNA|ScriptureReconstructionLincRNAsByLuo[unpublished]|linc_luo_1115|NULL|-1.4045400|-0.3319133	chr2	208230422	208231620	+	NA	NA	NA	inter
CUST_21505_PI429285431	0.0428725	2.08226	lncRNA	lncipedia2.1	>lnc-SLC6A7-1:1	chr5	149563575	149564055	+	CDX1	NA	chr5:149553575-149564121	inner
CUST_4826_PI429285431	0.0211581	2.08144	lncRNA	gencode_v17	>transcript_id "ENST00000454942.1" | genecode_v17	chr14	53635772	53636285	+	NA	NA	NA	inter
LNCA_21_P0006240	0.00668497	2.08061	lncRNA	Agilent_HUMAN_G3V2	TCONS_00016212	chr9	138023306	138023443	+	NA	NA	NA	Unknown
CUST_27153_PI429285431	0.0487843	2.07914	lncRNA	NONCODERv3	>n324277|NULL|mRNAlikelncRNA|Homosapiens|vegalncRNA|GENCODE|OTTHUMT00000322481|http://vega.sanger.ac.uk/Homo_sapiens/Transcript/Summary?db=core;t=OTTHUMT00000322481|-0.3578940|-0.2671886	chr7	93441	95344	-	NA	hg19_refFlat_ZNF493:range=chr19:21580040-215903305'pad=0,hg19_refFlat_ZNF493:range=chr19:21580040-215903305'pad=0 3'pad=0 strand=+ repeatMasking=none,-67.30;hg19_refFlat_LOC100144595:range=chr2:155294103-1553023685'pad=0,hg19_refFlat_LOC100144595:range=chr2:155294103-1553023685'pad=0 3'pad=0 strand=- repeatMasking=none,-80.40;hg19_refFlat_CNGA1:range=chr4:47938438-479731175'pad=0,hg19_refFlat_CNG…	NA	inter
CUST_39332_PI429285431	0.0384529	2.07834	lncRNA	NONCODERv3	>n386391|NULL|lncRNA|Homosapiens||UCSCGeneNoncode|uc010iyn.2||2.3494200|-0.2099971	chr5	70422488	70423665	-	LOC100652870	NA	chr5:70519357-70519728	inter
CUST_27868_PI429285431	0.0270934	2.07792	lncRNA	NONCODERv3	>n325104|NULL|mRNAlikelncRNA|Homosapiens|vegalncRNA|GENCODE|OTTHUMT00000329068|http://vega.sanger.ac.uk/Homo_sapiens/Transcript/Summary?db=core;t=OTTHUMT00000329068|-1.1936000|-0.4172319	chr2	237326155	237327034	+	IQCA1	NA	chr2:237316155-237337745	inter
CUST_5387_PI429285431	0.00557784	2.07705	lncRNA	gencode_v17	>transcript_id "ENST00000564390.1" | genecode_v17	chr16	1115240	1116118	+	SSTR5	NA	chr16:1122756-1126502	inter
CUST_48488_PI429285431	0.00565837	2.075	lncRNA	UCSC	>hg19_lincRNAsTranscripts_TCONS_l2_00000917 range=chr1:240170851-240176558 5'pad=0 3'pad=0 strand=+ repeatMasking=none	chr1	240170851	240171702	+	NA	NA	NA	inter
CUST_9700_PI429285431	0.0168987	2.07227	lncRNA	lncipedia2.1	>lnc-RP11-295D22.1.1-6:2	chr9	121738563	121738786	+	NA	NA	NA	inter
CUST_44426_PI429285431	0.00742494	2.07216	lncRNA	ncbi	>gi|335353790|ref|NR_038380.1| Homo sapiens SLC7A11 antisense RNA 1 (SLC7A11-AS1), non-coding RNA	Chr4	139013168	139014838	+	NA	hg19_refFlat_PPIP5K1:range=chr15:43826872-438767025'pad=0,hg19_refFlat_PPIP5K1:range=chr15:43826872-438767025'pad=0 3'pad=0 strand=- repeatMasking=none,-40.20;hg19_refFlat_GDPD2:range=chrX:69644835-696529365'pad=0,hg19_refFlat_GDPD2:range=chrX:69644835-696529365'pad=0 3'pad=0 strand=+ repeatMasking=none,-80.40;hg19_refFlat_ARHGAP8:range=chr22:45182408-452584755'pad=0,hg19_refFlat_ARHGAP8:range=ch…	NA	inter
CUST_2584_PI429285431	0.0161636	2.07207	lncRNA	gencode_v17	>transcript_id "ENST00000574739.1" | genecode_v17	chr6	97753462	97754039	+	NA	NA	NA	inter
CUST_39347_PI429285431	0.0110089	2.07134	lncRNA	NONCODERv3	>n386434|NULL|lncRNA|Homosapiens||UCSCGeneNoncode|uc010kzd.1||-1.1533900|-0.2719125	chr7	54268916	54270113	-	NA	NA	NA	inter
CUST_35574_PI429285431	0.0137814	2.07123	lncRNA	NONCODERv3	>n342706|CR623805|mRNAlikelncRNA|Homosapiens|HumanlncRNA|JounralRNA|5208|NULL|1.4487500|-0.1457389	chr5	150400123	150401747	+	GPX3	NA	chr5:150399999-150408554	inner
LNCA_21_P0007810	0.0206134	2.06863	lncRNA	Agilent_HUMAN_G3V2	TCONS_00021007	chr12	131895592	131895651	-	NA	NA	NA	Unknown
LNCA_21_P0008477	0.0457773	2.06768	lncRNA	Agilent_HUMAN_G3V2	TCONS_00022840	chr14	94453089	94453148	-	NA	NA	NA	Unknown
LNCA_21_P0003282	0.0279267	2.06627	lncRNA	Agilent_HUMAN_G3V2	TCONS_00007130	chr3	25905281	25905340	-	NA	NA	NA	Unknown
CUST_14030_PI429285431	0.0396253	2.06561	lncRNA	lncipedia2.1	>lnc-BMP6-8:2	chr6	8926047	8929046	+	NA	NA	NA	inter
LNCA_19_P00316467	0.049176	2.06547	lncRNA	Agilent_HUMAN_G3V2	ENST00000473756	chr3	98700099	98700158	+	NA	NA	NA	Unknown
CUST_5254_PI429285431	0.0355327	2.06546	lncRNA	gencode_v17	>transcript_id "ENST00000560533.1" | genecode_v17	chr15	79505439	79506050	-	ANKRD34C	NA	chr15:79575146-79586197	inter
LNCA_21_P0013502	0.00217562	2.06337	lncRNA	Agilent_HUMAN_G3V2	TCONS_l2_00028009	chr8	142524445	142524504	+	NA	NA	NA	Unknown
CUST_49335_PI429285431	0.0360352	2.06249	lncRNA	UCSC	>hg19_lincRNAsTranscripts_TCONS_l2_00023411 range=chr5:68914137-68919906 5'pad=0 3'pad=0 strand=+ repeatMasking=none	chr5	68914137	68914680	+	NA	NA	NA	inter
CUST_22517_PI429285431	0.00387351	2.05972	lncRNA	lncipedia2.1	>lnc-CDC42SE1-1:1	chr1	151042740	151043321	-	GABPB2	hg19_refFlat_MLLT11:range=chr1:151039701-1510399735'pad=0,hg19_refFlat_MLLT11:range=chr1:151039701-1510399735'pad=0 3'pad=0 strand=+ repeatMasking=none,-91.10chr1:151043080-151052801	NA	inter
CUST_9836_PI429285431	0.0467339	2.0595	lncRNA	lncipedia2.1	>lnc-RTL1-5:2	chr14	101800570	101801735	-	NA	NA	NA	inter
CUST_39767_PI429285431	0.015664	2.05936	lncRNA	NONCODERv3	>n405969|NR_003251|lncRNA|Homosapiens||RefGeneNoncode|NR_003251||5.0084200|-0.3086842	chr10	121485608	121486557	+	INPP5F	NA	chr10:121485609-121561720	inner
CUST_49791_PI429285431	0.00206597	2.05905	lncRNA	UCSC	>hg19_lincRNAsTranscripts_TCONS_l2_00025910 range=chr7:62812765-62841245 5'pad=0 3'pad=0 strand=+ repeatMasking=none	chr7	62812765	62815573	+	NA	NA	NA	inter
CUST_17661_PI429285431	0.0307704	2.0572	lncRNA	lncipedia2.1	>lnc-MS4A8B-1:7	chr11	60454383	60454749	+	NA	NA	NA	inter
CUST_51086_PI429285431	0.0417482	2.0562	lncRNA	UCSC	>hg19_lincRNAsTranscripts_TCONS_l2_00006860 range=chr13:53144435-53161223 5'pad=0 3'pad=0 strand=+ repeatMasking=none	chr13	53144435	53145385	+	NA	NA	NA	inter
CUST_6554_PI429285431	0.00636655	2.05576	lncRNA	gencode_v17	>transcript_id "ENST00000600007.1" | genecode_v17	chr19	49521504	49521996	-	RUVBL2	NA	chr19:49511504-49519182	inter
CUST_12411_PI429285431	0.0183264	2.05567	lncRNA	lncipedia2.1	>lnc-ERGIC1-2:4	chr5	172209075	172209797	+	NA	NA	NA	inter
CUST_49430_PI429285431	0.02291	2.05229	lncRNA	UCSC	>hg19_lincRNAsTranscripts_TCONS_l2_00022663 range=chr5:177375112-177379083 5'pad=0 3'pad=0 strand=+ repeatMasking=none	chr5	177375112	177376053	+	NA	hg19_refFlat_MAP4K1:range=chr19:39078450-391085355'pad=0,hg19_refFlat_MAP4K1:range=chr19:39078450-391085355'pad=0 3'pad=0 strand=- repeatMasking=none,-71.60;hg19_refFlat_IFT20:range=chr17:26655748-266590115'pad=0,hg19_refFlat_IFT20:range=chr17:26655748-266590115'pad=0 3'pad=0 strand=- repeatMasking=none,-20.50;hg19_refFlat_WDR27:range=chr6:169857687-1700891015'pad=0,hg19_refFlat_WDR27:range=chr6:…	NA	inter
LNCA_19_P00322836	0.0330829	2.05155	lncRNA	Agilent_HUMAN_G3V2	ENST00000503048	chr5	152603042	152603101	-	NA	NA	NA	Unknown
CUST_37004_PI429285431	0.0293977	2.05152	lncRNA	NONCODERv3	>n345462|NULL|lincRNA|Homosapiens|HumanlincRNA|ScriptureReconstructionLincRNAsByLuo[unpublished]|linc_luo_1011|NULL|-1.4593700|-0.3201060	chr1	147718200	147719363	+	NA	NA	NA	inter
CUST_52062_PI429285431	0.0279902	2.05019	lncRNA	UCSC	>hg19_lincRNAsTranscripts_TCONS_l2_00017584 range=chr22:18975276-19008329 5'pad=0 3'pad=0 strand=+ repeatMasking=none	chr22	18978276	18979493	+	NA	NA	NA	inter
CUST_21904_PI429285431	0.00112509	2.04816	lncRNA	lncipedia2.1	>lnc-GLUD1-3:1	chr10	88729020	88729737	-	AGAP11	NA	chr10:88730498-88739158	inner
LNCA_21_P0008187	0.0396141	2.047	lncRNA	Agilent_HUMAN_G3V2	TCONS_00022065	chr13	80644119	80644178	-	NA	NA	NA	Unknown
CUST_18593_PI429285431	0.012911	2.04643	lncRNA	lncipedia2.1	>lnc-BCL7A-1:2	chr12	122502456	122503042	+	BCL7A	NA	chr12:122492456-122499950	inter
CUST_44802_PI429285431	0.0293442	2.0458	lncRNA	ncbi	>gi|315139030|ref|NR_037662.1| Homo sapiens selenoprotein K pseudogene (LOC100287632), non-coding RNA	Chr6	119103871	119104592	+	NA	NA	NA	inter
CUST_13954_PI429285431	0.0172549	2.04527	lncRNA	lncipedia2.1	>lnc-FAM182B-5:1	chr20	26160090	26160629	-	NA	NA	NA	inter
LNCA_21_P0005151	0.0406392	2.04319	lncRNA	Agilent_HUMAN_G3V2	TCONS_00012638	chr6	1060091	1060150	-	NA	NA	NA	Unknown
CUST_23973_PI429285431	0.0427717	2.04314	lncRNA	lncipedia2.1	>lnc-FBXO7-2:1	chr22	32979863	32980319	+	SYN3	NA	chr22:32969863-32990190	inner
CUST_28136_PI429285431	0.0399994	2.04308	lncRNA	NONCODERv3	>n325413|NULL|mRNAlikelncRNA|Homosapiens|vegalncRNA|GENCODE|OTTHUMT00000323736|http://vega.sanger.ac.uk/Homo_sapiens/Transcript/Summary?db=core;t=OTTHUMT00000323736|-1.3457300|-0.2138135	chr2	16142794	16143435	-	NA	NA	NA	inter
CUST_50490_PI429285431	0.0173218	2.04302	lncRNA	UCSC	>hg19_lincRNAsTranscripts_TCONS_l2_00030560 range=chrX:101032844-101035506 5'pad=0 3'pad=0 strand=- repeatMasking=none	chrX	101032844	101035325	-	NA	NA	NA	inter
CUST_3210_PI429285431	0.0443613	2.04301	lncRNA	gencode_v17	>transcript_id "ENST00000520988.1" | genecode_v17	chr8	83020800	83021258	-	NA	NA	NA	inter
CUST_37114_PI429285431	0.000488451	2.04272	lncRNA	NONCODERv3	>n345557|NULL|lincRNA|Homosapiens|HumanlincRNA|ScriptureReconstructionLincRNAsByLuo[unpublished]|linc_luo_1106|NULL|-1.3096300|-0.4409897	chr2	183774744	183777232	-	NCKAP1	NA	chr2:183789605-183797397	inter
CUST_24066_PI429285431	0.0289842	2.04225	lncRNA	lncipedia2.1	>lnc-CDYL2-6:4	chr16	80574502	80574919	-	DYNLRB2	NA	chr16:80574854-80584541	inter
CUST_8963_PI429285431	0.00536924	2.0406	lncRNA	lncipedia2.1	>lnc-OSBPL6-2:4	chr2	179283238	179283977	+	NA	NA	NA	inter
LNCA_21_P0007552	0.0167558	2.03895	lncRNA	Agilent_HUMAN_G3V2	TCONS_00020407	chr12	48638149	48638208	+	NA	NA	NA	Unknown
CUST_46617_PI429285431	0.0253027	2.0387	lncRNA	ncbi	>gi|338221691|ref|NR_039998.1| Homo sapiens uncharacterized LOC100506655 (LOC100506655), non-coding RNA	Chr16	25151892	25154502	-	NA	NA	NA	inter
CUST_28091_PI429285431	0.0264817	2.03852	lncRNA	NONCODERv3	>n325362|NULL|mRNAlikelncRNA|Homosapiens|vegalncRNA|GENCODE|OTTHUMT00000324720|http://vega.sanger.ac.uk/Homo_sapiens/Transcript/Summary?db=core;t=OTTHUMT00000324720|-1.2208400|-0.2066427	chr2	26747625	26748191	-	OTOF	NA	chr2:26737625-26760836	inner
CUST_7625_PI429285431	0.0132726	2.03757	lncRNA	lncipedia2.1	>lnc-TRPV2-1:26	chr17	16367033	16367721	+	C17orf76	NA	chr17:16357033-16377300	inner
CUST_23956_PI429285431	0.00520314	2.03488	lncRNA	lncipedia2.1	>lnc-MRPL32-1:1	chr7	43202525	43204363	+	HECW1	NA	chr7:43192525-43212786	inner
CUST_4404_PI429285431	0.0330746	2.03419	lncRNA	gencode_v17	>transcript_id "ENST00000551161.1" | genecode_v17	chr12	111269583	111270163	+	CCDC63	hg19_refFlat_OR1J1:range=chr9:125239237-1252402055'pad=0,hg19_refFlat_OR1J1:range=chr9:125239237-1252402055'pad=0 3'pad=0 strand=- repeatMasking=none,-77.60;hg19_refFlat_PCCB:range=chr3:135969218-1360488685'pad=0,hg19_refFlat_PCCB:range=chr3:135969218-1360488685'pad=0 3'pad=0 strand=+ repeatMasking=none,-70.90;hg19_refFlat_ISY1:range=chr3:128848924-1288798185'pad=0,hg19_refFlat_ISY1:range=chr3:12…	NA	inter
CUST_24458_PI429285431	0.00768929	2.03372	lncRNA	lncipedia2.1	>lnc-FAM72A-2:1	chr1	205904736	205904965	+	SLC26A9	hg19_refFlat_SLC26A9:range=chr1:205884020-2059049485'pad=0,hg19_refFlat_SLC26A9:range=chr1:205884020-2059049485'pad=0 3'pad=0 strand=- repeatMasking=none,-85.50;hg19_refFlat_SLC26A9:range=chr1:205884485-2059049485'pad=0,hg19_refFlat_SLC26A9:range=chr1:205884485-2059049485'pad=0 3'pad=0 strand=- repeatMasking=none,-85.50chr1:205894736-205912588	NA	inner
CUST_6904_PI429285431	0.0317718	2.03313	lncRNA	gencode_v17	>transcript_id "ENST00000445242.1" | genecode_v17	chr21	46756622	46757000	+	NA	NA	NA	inter
CUST_42539_PI429285431	0.00271548	2.03207	lncRNA	ensembl.GRCh37.72	>ENST00000458908 ncrna:snoRNA chromosome:GRCh37:X:117872018:117872145:1 gene:ENSG00000239182 gene_biotype:snoRNA transcript_biotype:snoRNA	chrX	117872018	117872145	+	IL13RA1	NA	chrX:117862018-117882145	inner
CUST_30553_PI429285431	0.0380949	2.03143	lncRNA	NONCODERv3	>n335732|X00086|mRNAlikelncRNA|Homosapiens|NULL|H-invitationalv7.5|HIT000320849|http://h-invitational.jp/hinv/spsoup/transcript_view?hit_id=HIT000320849|0.4180570|-0.2497241	chr4	155529659	155529862	-	FGG	NA	chr4:155525286-155533902	inner
CUST_11758_PI429285431	0.0446366	2.03142	lncRNA	lncipedia2.1	>lnc-DRD5-10:3	chr4	11779810	11780641	+	NA	NA	NA	inter
LNCA_21_P0014243	0.0379072	2.03026	lncRNA	Agilent_HUMAN_G3V2	ENST00000438380	chr9	127534036	127535023	+	NA	NA	NA	Unknown
CUST_31363_PI429285431	0.0199015	2.02932	lncRNA	NONCODERv3	>n337830|BX537613|mRNAlikelncRNA|Homosapiens|HumanlncRNA|JounralRNA|213|NULL|-1.1625700|-0.3864746	chrX	110367492	110370491	+	PAK3	NA	chrX:110357492-110382431	inner
CUST_11488_PI429285431	0.00942649	2.02914	lncRNA	lncipedia2.1	>lnc-ZNF804A-1:4	chr2	186084780	186085336	+	NA	NA	NA	inter
CUST_5407_PI429285431	0.0327048	2.0289	lncRNA	gencode_v17	>transcript_id "ENST00000571152.1" | genecode_v17	chr16	3043195	3043579	+	PKMYT1	hg19_refFlat_WDR27:range=chr6:169857687-1700891015'pad=0,hg19_refFlat_WDR27:range=chr6:169857687-1700891015'pad=0 3'pad=0 strand=- repeatMasking=none,-74.60;hg19_refFlat_ZNF493:range=chr19:21580040-215903305'pad=0,hg19_refFlat_ZNF493:range=chr19:21580040-215903305'pad=0 3'pad=0 strand=+ repeatMasking=none,-63.40;hg19_refFlat_SGCE:range=chr7:94214811-942854105'pad=0,hg19_refFlat_SGCE:range=chr7:94…	NA	inter
LNCA_33_P3259740	0.0011675	2.0285	lncRNA	Agilent_HUMAN_G3V2	ENST00000415242	chr18	74402401	74402460	+	NA	NA	NA	Unknown
CUST_16188_PI429285431	0.00356425	2.02563	lncRNA	lncipedia2.1	>lnc-AC092031.1-1:3	chr7	96293515	96294002	-	NA	NA	NA	inter
LNCA_21_P0001240	0.0274732	2.02551	lncRNA	Agilent_HUMAN_G3V2	ENST00000425412	chr1	231662856	231662915	-	NA	NA	NA	Unknown
CUST_39905_PI429285431	0.0198613	2.02483	lncRNA	NONCODERv3	>n406639|NR_024168|lncRNA|Homosapiens||RefGeneNoncode|NR_024168||6.0081600|-0.2357121	chr9	120466459	120469458	+	TLR4	NA	chr9:120466460-120479768	inner
CUST_52227_PI429285431	0.00804099	2.02351	lncRNA	UCSC	>hg19_lincRNAsTranscripts_TCONS_l2_00031172 range=chr1_gl000192_random:222732-373960 5'pad=0 3'pad=0 strand=- repeatMasking=none	chr1_gl000192_random	222732	225731	-	NA	NA	NA	Unknown
CUST_11848_PI429285431	0.0251005	2.02231	lncRNA	lncipedia2.1	>lnc-FAM127A-1:1	chrX	134173057	134176056	+	FAM127A	NA	chrX:134166333-134167576	inter
CUST_23762_PI429285431	0.0180554	2.01879	lncRNA	lncipedia2.1	>lnc-FGF23-1:1	chr12	4384188	4384682	-	CCND2	NA	chr12:4382902-4394231	inner
CUST_852_PI429285431	0.0217249	2.01876	lncRNA	gencode_v17	>transcript_id "ENST00000413227.1" | genecode_v17	chr2	38685788	38686215	-	NA	NA	NA	inter
CUST_22787_PI429285431	0.00271262	2.01831	lncRNA	lncipedia2.1	>lnc-PAQR4-1:6	chr16	3050087	3050447	+	NA	NA	NA	inter
CUST_26967_PI429285431	0.0233175	2.01737	lncRNA	NONCODERv3	>n324051|NULL|mRNAlikelncRNA|Homosapiens|vegalncRNA|GENCODE|OTTHUMT00000052985|http://vega.sanger.ac.uk/Homo_sapiens/Transcript/Summary?db=core;t=OTTHUMT00000052985|0.3345370|-0.2088864	chr9	90814768	90815212	-	NA	hg19_refFlat_NARF:range=chr17:80416680-804460335'pad=0,hg19_refFlat_NARF:range=chr17:80416680-804460335'pad=0 3'pad=0 strand=+ repeatMasking=none,-69.40;hg19_refFlat_ZNF714:range=chr19:21281075-213011355'pad=0,hg19_refFlat_ZNF714:range=chr19:21281075-213011355'pad=0 3'pad=0 strand=+ repeatMasking=none,-70.40	NA	inter
CUST_14298_PI429285431	0.0310654	2.0169	lncRNA	lncipedia2.1	>lnc-WDR60-4:5	chr7	158813176	158814494	+	VIPR2	NA	chr7:158820866-158823556	inter
CUST_9_PI429201921	0.0170645	2.01672	lncRNA	Affy_HUMAN_HTA2.0	linc-SLC7A4-4	chr22	21570319	21571057	-	NA	NA	NA	Unknown
CUST_14399_PI429285431	0.0313395	2.01609	lncRNA	lncipedia2.1	>lnc-ASAP1-2:1	chr8	131544090	131546215	-	NA	hg19_refFlat_PRR16:range=chr5:119816899-1200224045'pad=0,hg19_refFlat_PRR16:range=chr5:119816899-1200224045'pad=0 3'pad=0 strand=+ repeatMasking=none,-72.00;hg19_refFlat_ZMAT1:range=chrX:101138482-1011736065'pad=0,hg19_refFlat_ZMAT1:range=chrX:101138482-1011736065'pad=0 3'pad=0 strand=- repeatMasking=none,-83.00;hg19_refFlat_BRD2:range=chr6_cox_hap2:4385214-43930395'pad=0,hg19_refFlat_BRD2:range=…	NA	inter
CUST_41964_PI429285431	0.0290376	2.01603	lncRNA	ensembl.GRCh37.72	>ENST00000581025 ncrna:miRNA chromosome:GRCh37:22:49937041:49937114:-1 gene:ENSG00000264139 gene_biotype:miRNA transcript_biotype:miRNA	chr22	49937041	49937114	-	NA	NA	NA	inter
CUST_6403_PI429285431	0.0491106	2.01582	lncRNA	gencode_v17	>transcript_id "ENST00000598922.1" | genecode_v17	chr19	23585219	23585790	-	ZNF91	hg19_refFlat_PRR16:range=chr5:119816899-1200224045'pad=0,hg19_refFlat_PRR16:range=chr5:119816899-1200224045'pad=0 3'pad=0 strand=+ repeatMasking=none,-68.70;hg19_refFlat_DISC1:range=chr1:231762614-2319907715'pad=0,hg19_refFlat_DISC1:range=chr1:231762614-2319907715'pad=0 3'pad=0 strand=+ repeatMasking=none,-86.40;hg19_refFlat_USP4:range=chr3:49349800-493774575'pad=0,hg19_refFlat_USP4:range=chr3:49…	NA	inter
CUST_45341_PI429285431	0.0491072	2.01578	lncRNA	ncbi	>gi|224591428|ref|NR_027294.1| Homo sapiens family with sequence similarity 201, member A (FAM201A), non-coding RNA	Chr9	38621085	38622825	+	NA	NA	NA	inter
LNCA_21_P0001987	0.0483036	2.01567	lncRNA	Agilent_HUMAN_G3V2	ENST00000439196	chr2	692271	692330	-	NA	NA	NA	Unknown
CUST_31262_PI429285431	0.0225246	2.01501	lncRNA	NONCODERv3	>n337718|AF074994|mRNAlikelncRNA|Homosapiens|HumanlncRNA|JounralRNA|100|NULL|-1.0764100|-0.3247062	chr15	41866358	41866831	-	TYRO3	NA	chr15:41856358-41871536	inner
CUST_48093_PI429285431	0.0138744	2.01431	lncRNA	ncbi	>gi|410170151|ref|XR_172475.1| PREDICTED: Homo sapiens DNA primase large subunit-like (LOC100996481), misc_RNA	NA	NA	NA	NA	NA	NA	NA	Unknown
CUST_9814_PI429285431	0.0431635	2.01336	lncRNA	lncipedia2.1	>lnc-ARRDC3-1:4	chr5	90610149	90610447	-	NA	hg19_refFlat_ST6GAL2:range=chr2:107429598-1074604335'pad=0,hg19_refFlat_ST6GAL2:range=chr2:107429598-1074604335'pad=0 3'pad=0 strand=- repeatMasking=none,-77.80	NA	inter
CUST_45509_PI429285431	0.0479678	2.01318	lncRNA	ncbi	>gi|212276217|ref|NR_024410.1| Homo sapiens uncharacterized LOC254312 (LOC254312), transcript variant 2, non-coding RNA	Chr10	10976903	10977959	-	NA	NA	NA	inter
LNCA_21_P0002394	0.0290332	2.01195	lncRNA	Agilent_HUMAN_G3V2	ENST00000450467	chr2	6789259	6789318	-	NA	NA	NA	Unknown
CUST_14558_PI429285431	0.0254501	2.00679	lncRNA	lncipedia2.1	>lnc-TTC7B-4:1	chr14	90921441	90924130	-	NA	NA	NA	inter
LNCA_21_P0009805	0.00305278	2.0066	lncRNA	Agilent_HUMAN_G3V2	TCONS_00027758	chr19	44288541	44288600	-	NA	NA	NA	Unknown
CUST_20241_PI429285431	0.0303857	2.00641	lncRNA	lncipedia2.1	>lnc-C17orf63-3:1	chr17	27069928	27070318	-	NEK8	hg19_refFlat_CYB561D1:range=chr1:110036762-1100388815'pad=0,hg19_refFlat_CYB561D1:range=chr1:110036762-1100388815'pad=0 3'pad=0 strand=+ repeatMasking=none,-79.20;hg19_refFlat_C8orf44:range=chr8:67589944-675921895'pad=0,hg19_refFlat_C8orf44:range=chr8:67589944-675921895'pad=0 3'pad=0 strand=+ repeatMasking=none,-82.90;hg19_refFlat_ZNF829:range=chr19:37382394-374068565'pad=0,hg19_refFlat_ZNF829:ra…	NA	inter
CUST_11283_PI429285431	0.0267059	2.00638	lncRNA	lncipedia2.1	>lnc-C9orf66-5:1	chr9	755232	755642	-	KANK1	hg19_refFlat_BCAS4:range=chr20:49411531-494930725'pad=0,hg19_refFlat_BCAS4:range=chr20:49411531-494930725'pad=0 3'pad=0 strand=+ repeatMasking=none,-72.10;hg19_refFlat_DISC1:range=chr1:231762614-2319907715'pad=0,hg19_refFlat_DISC1:range=chr1:231762614-2319907715'pad=0 3'pad=0 strand=+ repeatMasking=none,-74.80;hg19_refFlat_NXNL2:range=chr9:91150350-911861075'pad=0,hg19_refFlat_NXNL2:range=chr9:91…	NA	inter
CUST_40931_PI429285431	0.0105247	2.00611	lncRNA	NONCODERv3	>n410853|NR_038310|lncRNA|Homosapiens||RefGeneNoncode|NR_038310||-1.0694200|-0.1784909	chr17	6919136	6919929	-	BCL6B	hg19_refFlat_C17orf49:range=chr17:6918177-69205845'pad=0,hg19_refFlat_C17orf49:range=chr17:6918177-69205845'pad=0 3'pad=0 strand=+ repeatMasking=none,-41.30;hg19_refFlat_C17orf49:range=chr17:6918177-69206405'pad=0,hg19_refFlat_C17orf49:range=chr17:6918177-69206405'pad=0 3'pad=0 strand=+ repeatMasking=none,-88.80chr17:6926369-6932961	NA	inter
CUST_1509_PI429285431	0.013473	2.00495	lncRNA	gencode_v17	>transcript_id "ENST00000486545.1" | genecode_v17	chr3	154687072	154687592	-	NA	NA	NA	inter
CUST_24360_PI429285431	0.0136771	2.00484	lncRNA	lncipedia2.1	>lnc-STK32C-1:2	chr10	133998469	133998949	-	JAKMIP3	NA	chr10:133988469-133998313	inter
CUST_4017_PI429285431	0.0296024	2.00391	lncRNA	gencode_v17	>transcript_id "ENST00000528781.1" | genecode_v17	chr11	76336506	76337336	-	NA	NA	NA	inter
CUST_23197_PI429285431	0.0239258	2.0035	lncRNA	lncipedia2.1	>lnc-CALCOCO2-5:2	chr17	46711913	46712126	+	HOXB9	NA	chr17:46701913-46703835	inter
CUST_45630_PI429285431	0.020107	2.00303	lncRNA	ncbi	>gi|337298882|ref|NR_038985.1| Homo sapiens uncharacterized LOC100132987 (LOC100132987), non-coding RNA	Chr10	80008382	80011211	+	NA	NA	NA	inter
LNCA_21_P0010026	0.0324295	2.0024	lncRNA	Agilent_HUMAN_G3V2	TCONS_00028349	chr20	24164321	24164380	-	NA	NA	NA	Unknown
CUST_48232_PI429285431	0.00104281	11.7723	lncRNA	UCSC	>hg19_lincRNAsTranscripts_TCONS_l2_00000650 range=chr1:157152695-157157512 5'pad=0 3'pad=0 strand=+ repeatMasking=none	chr1	157152695	157154098	+	NA	NA	NA	inter
LNCA_21_P0010563	0.00677192	11.3921	lncRNA	Agilent_HUMAN_G3V2	TCONS_l2_00000650	chr1	157157449	157157508	+	NA	NA	NA	Unknown
CUST_33861_PI429285431	0.01227	9.36746	lncRNA	NONCODERv3	>n340648|CR616125|mRNAlikelncRNA|Homosapiens|HumanlncRNA|JounralRNA|3110|NULL|-1.0864700|-0.1662360	chr17	37321337	37324101	+	CACNB1	hg19_refFlat_ARL5C:range=chr17:37313147-373220135'pad=0,hg19_refFlat_ARL5C:range=chr17:37313147-373220135'pad=0 3'pad=0 strand=- repeatMasking=none,-82.50chr17:37329709-37334102	NA	inner
CUST_13651_PI429285431	0.0182985	8.88459	lncRNA	lncipedia2.1	>lnc-KCNT2-1:1	chr1	196129500	196130232	-	NA	NA	NA	inter
CUST_34761_PI429285431	0.000621429	8.7936	lncRNA	NONCODERv3	>n341669|BX538226|mRNAlikelncRNA|Homosapiens|HumanlncRNA|JounralRNA|4140|NULL|0.3271770|-0.3689391	chr9	27943614	27944517	-	LINGO2	hg19_refFlat_ISY1:range=chr3:128848924-1288798185'pad=0,hg19_refFlat_ISY1:range=chr3:128848924-1288798185'pad=0 3'pad=0 strand=- repeatMasking=none,-76.00;hg19_refFlat_NANOGNB:range=chr12:7917882-79264475'pad=0,hg19_refFlat_NANOGNB:range=chr12:7917882-79264475'pad=0 3'pad=0 strand=+ repeatMasking=none,-80.80;hg19_refFlat_ZNF429:range=chr19:21688574-217208805'pad=0,hg19_refFlat_ZNF429:range=chr19:…	NA	inter
LNCA_21_P0001608	0.0254056	8.40965	lncRNA	Agilent_HUMAN_G3V2	ENST00000430519	chr1	196014285	196014344	-	NA	NA	NA	Unknown
CUST_24918_PI429285431	0.00118651	7.17847	lncRNA	lncipedia2.1	>lnc-APTX-1:1	chr9	32841479	32842029	-	NA	NA	NA	inter
CUST_51020_PI429285431	0.0329017	7.00002	lncRNA	UCSC	>hg19_lincRNAsTranscripts_TCONS_l2_00007044 range=chr13:19312242-19318510 5'pad=0 3'pad=0 strand=- repeatMasking=none	chr13	19312242	19315241	-	NA	NA	NA	inter
CUST_36222_PI429285431	0.0174629	6.93488	lncRNA	NONCODERv3	>n344766|NULL|lincRNA|Homosapiens|HumanlincRNA|ScriptureReconstructionLincRNAsByLuo[unpublished]|linc_luo_315|NULL|-1.3189000|-0.2587506	chr14	98392666	98395665	-	NA	NA	NA	inter
LNCA_21_P0003316	0.0478628	6.89391	lncRNA	Agilent_HUMAN_G3V2	AK056081	chr4	4788961	4789020	+	NA	NA	NA	Unknown
CUST_36454_PI429285431	0.0321813	6.8673	lncRNA	NONCODERv3	>n344965|NULL|lincRNA|Homosapiens|HumanlincRNA|ScriptureReconstructionLincRNAsByLuo[unpublished]|linc_luo_514|NULL|-1.3151500|-0.3658060	chr7	105548098	105551097	+	NA	NA	NA	inter
CUST_44665_PI429285431	0.00523712	6.51188	lncRNA	ncbi	>gi|224028265|ref|NR_026970.1| Homo sapiens LY86 antisense RNA 1 (LY86-AS1), non-coding RNA	Chr6	6346698	6348734	-	NA	NA	NA	inter
LNCA_21_P0011378	0.0135975	6.41284	lncRNA	Agilent_HUMAN_G3V2	TCONS_l2_00009129	chr15	59698613	59698672	-	NA	NA	NA	Unknown
CUST_6565_PI429285431	0.0099883	6.31363	lncRNA	gencode_v17	>transcript_id "ENST00000600765.1" | genecode_v17	chr19	51897742	51898300	+	SIGLEC10	NA	chr19:51899492-51916904	inter
CUST_52013_PI429285431	0.0239434	6.28427	lncRNA	UCSC	>hg19_lincRNAsTranscripts_TCONS_l2_00017418 range=chr21:15219080-15220526 5'pad=0 3'pad=0 strand=- repeatMasking=none	chr21	15219080	15219703	-	NA	NA	NA	inter
CUST_35554_PI429285431	0.0111566	6.1	lncRNA	NONCODERv3	>n342682|CR749489|mRNAlikelncRNA|Homosapiens|HumanlncRNA|JounralRNA|5184|NULL|-0.9425640|-0.2877286	chr5	110850923	110853470	+	C5orf13	NA	chr5:111065000-111085423	inner
CUST_7929_PI429285431	0.00582236	6.08265	lncRNA	lncipedia2.1	>lnc-GIMAP8-1:2	chr7	150144164	150146206	+	GIMAP8	hg19_refFlat_YIF1B:range=chr19:38796129-388065575'pad=0,hg19_refFlat_YIF1B:range=chr19:38796129-388065575'pad=0 3'pad=0 strand=- repeatMasking=none,-81.40;hg19_refFlat_PKP2:range=chr12:32945358-330496655'pad=0,hg19_refFlat_PKP2:range=chr12:32945358-330496655'pad=0 3'pad=0 strand=- repeatMasking=none,-79.10;hg19_refFlat_C8orf44:range=chr8:67589944-675921895'pad=0,hg19_refFlat_C8orf44:range=chr8:67…	NA	inter
CUST_9013_PI429285431	0.0134192	6.06876	lncRNA	lncipedia2.1	>lnc-TMPRSS11E-1:5	chr4	68656166	68656712	+	NA	hg19_refFlat_GNRHR:range=chr4:68606307-686200535'pad=0,hg19_refFlat_GNRHR:range=chr4:68606307-686200535'pad=0 3'pad=0 strand=- repeatMasking=none,-77.10;hg19_refFlat_GNRHR:range=chr4:68606198-686200535'pad=0,hg19_refFlat_GNRHR:range=chr4:68606198-686200535'pad=0 3'pad=0 strand=- repeatMasking=none,-77.10	NA	inter
LNCA_21_P0013720	0.00645071	6.05591	lncRNA	Agilent_HUMAN_G3V2	ENST00000424177	chr9	32840647	32840706	-	NA	NA	NA	Unknown
CUST_43714_PI429285431	0.0301332	6.04812	lncRNA	ncbi	>gi|310124617|ref|XR_110789.1| PREDICTED: Homo sapiens uncharacterized LOC100505650, transcript variant 3 (LOC100505650), misc_RNA	NA	NA	NA	NA	NA	hg19_refFlat_HSD11B1L:range=chr19:5684044-56879565'pad=0,hg19_refFlat_HSD11B1L:range=chr19:5684044-56879565'pad=0 3'pad=0 strand=+ repeatMasking=none,-72.70;hg19_refFlat_UBE2J2:range=chr1:1190583-12033725'pad=0,hg19_refFlat_UBE2J2:range=chr1:1190583-12033725'pad=0 3'pad=0 strand=- repeatMasking=none,-31.10;hg19_refFlat_BRD2:range=chr6_ssto_hap7:4421448-44292735'pad=0,hg19_refFlat_BRD2:range=chr6_…	NA	Unknown
CUST_290_PI429201921	0.0263006	5.91904	lncRNA	Affy_HUMAN_HTA2.0	linc-DEFB105B-4	chr8	7847937	7855043	-	SCMH1	NA	chr1:41698045-41707815	Unknown
CUST_39422_PI429285431	0.00874793	5.88824	lncRNA	NONCODERv3	>n386722|NULL|lncRNA|Homosapiens||UCSCGeneNoncode|uc010tcj.1||1.6736300|-0.3861843	chr13	19411542	19414541	-	NA	hg19_refFlat_ASMT:range=chrY:1684093-17119075'pad=0,hg19_refFlat_ASMT:range=chrY:1684093-17119075'pad=0 3'pad=0 strand=+ repeatMasking=none,-50.50;hg19_refFlat_BRD2:range=chr6_cox_hap2:4385214-43930395'pad=0,hg19_refFlat_BRD2:range=chr6_cox_hap2:4385214-43930395'pad=0 3'pad=0 strand=+ repeatMasking=none,-81.40;hg19_refFlat_TSFM:range=chr12:58176585-581903665'pad=0,hg19_refFlat_TSFM:range=chr12:58…	NA	inter
CUST_33411_PI429285431	0.0317577	5.86436	lncRNA	NONCODERv3	>n340136|CR604602|mRNAlikelncRNA|Homosapiens|HumanlncRNA|JounralRNA|2595|NULL|-0.9672640|-0.2367208	chr10	105342117	105343430	+	NEURL	hg19_refFlat_C14orf178:range=chr14:78235743-782360215'pad=0,hg19_refFlat_C14orf178:range=chr14:78235743-782360215'pad=0 3'pad=0 strand=+ repeatMasking=none,-76.50;hg19_refFlat_C14orf178:range=chr14:78227386-782360215'pad=0,hg19_refFlat_C14orf178:range=chr14:78227386-782360215'pad=0 3'pad=0 strand=+ repeatMasking=none,-76.50;hg19_refFlat_NOS3:range=chr7:150690892-1507004915'pad=0,hg19_refFlat_NOS3…	NA	inner
CUST_39193_PI429285431	0.00104066	5.82197	lncRNA	NONCODERv3	>n385948|NULL|lncRNA|Homosapiens||UCSCGeneNoncode|uc009whw.1||0.5131450|-0.1972333	chr1	143687145	143688271	+	NA	hg19_refFlat_ADAMTS2:range=chr5:178578130-1787723295'pad=0,hg19_refFlat_ADAMTS2:range=chr5:178578130-1787723295'pad=0 3'pad=0 strand=- repeatMasking=none,-75.00	NA	inter
CUST_51024_PI429285431	0.0290742	5.7764	lncRNA	UCSC	>hg19_lincRNAsTranscripts_TCONS_l2_00007045 range=chr13:19312253-19328859 5'pad=0 3'pad=0 strand=- repeatMasking=none	chr13	19324253	19326043	-	NA	NA	NA	inter
CUST_292_PI429201921	0.0111591	5.71054	lncRNA	Affy_HUMAN_HTA2.0	linc-DEFB105B-4	chr8	7847937	7855043	-	SCMH1	NA	chr1:41698045-41707815	Unknown
CUST_25010_PI429285431	0.01217	5.65805	lncRNA	lncipedia2.1	>lnc-SLC7A6-1:1	chr16	68352647	68353074	+	PRMT7	hg19_refFlat_SEPP1:range=chr5:42800822-428108695'pad=0,hg19_refFlat_SEPP1:range=chr5:42800822-428108695'pad=0 3'pad=0 strand=- repeatMasking=none,-77.50;hg19_refFlat_TSFM:range=chr12:58176585-581903665'pad=0,hg19_refFlat_TSFM:range=chr12:58176585-581903665'pad=0 3'pad=0 strand=+ repeatMasking=none,-26.80;hg19_refFlat_TCTN1:range=chr12:111051988-1110856975'pad=0,hg19_refFlat_TCTN1:range=chr12:1110…	NA	inner
CUST_3405_PI429285431	0.0148122	5.62597	lncRNA	gencode_v17	>transcript_id "ENST00000593216.1" | genecode_v17	chr9	42469685	42470443	+	CBWD7	NA	chr9:42478004-42480994	inter
CUST_23492_PI429285431	0.0246989	5.62271	lncRNA	lncipedia2.1	>lnc-ZNF461-1:2	chr19	37178170	37179135	-	ZNF567	NA	chr19:37180302-37188312	inter
CUST_9684_PI429285431	0.0018309	5.58646	lncRNA	lncipedia2.1	>lnc-GIMAP8-1:1	chr7	150144164	150146016	+	GIMAP8	hg19_refFlat_PKP2:range=chr12:32945358-330496655'pad=0,hg19_refFlat_PKP2:range=chr12:32945358-330496655'pad=0 3'pad=0 strand=- repeatMasking=none,-79.10;hg19_refFlat_BIRC5:range=chr17:76210398-762196355'pad=0,hg19_refFlat_BIRC5:range=chr17:76210398-762196355'pad=0 3'pad=0 strand=+ repeatMasking=none,-77.30;hg19_refFlat_FBLIM1:range=chr1:16091479-161015265'pad=0,hg19_refFlat_FBLIM1:range=chr1:1609…	NA	inter
CUST_40641_PI429285431	0.00534929	5.56965	lncRNA	NONCODERv3	>n410160|NR_036635|lncRNA|Homosapiens||RefGeneNoncode|NR_036635||0.8611360|-0.3109421	chr2	63344985	63346676	-	WDPCP	hg19_refFlat_MYL10:range=chr7:101256755-1012723985'pad=0,hg19_refFlat_MYL10:range=chr7:101256755-1012723985'pad=0 3'pad=0 strand=- repeatMasking=none,-70.80;hg19_refFlat_STAP2:range=chr19:4324130-43387505'pad=0,hg19_refFlat_STAP2:range=chr19:4324130-43387505'pad=0 3'pad=0 strand=- repeatMasking=none,-77.90;hg19_refFlat_BTG3:range=chr21:18966411-189814625'pad=0,hg19_refFlat_BTG3:range=chr21:189664…	NA	inter
CUST_45637_PI429285431	0.0190822	5.47022	lncRNA	ncbi	>gi|226061032|ref|NR_027432.1| Homo sapiens uncharacterized LOC219347 (LOC219347), transcript variant 5, non-coding RNA	Chr10	81808989	81809723	-	NA	hg19_refFlat_TEX11:range=chrX:69748945-701173965'pad=0,hg19_refFlat_TEX11:range=chrX:69748945-701173965'pad=0 3'pad=0 strand=- repeatMasking=none,-73.00;hg19_refFlat_RTBDN:range=chr19:12937421-129459125'pad=0,hg19_refFlat_RTBDN:range=chr19:12937421-129459125'pad=0 3'pad=0 strand=- repeatMasking=none,-79.90;hg19_refFlat_NPC1L1:range=chr7:44553046-445808585'pad=0,hg19_refFlat_NPC1L1:range=chr7:4455…	NA	inter
LNCA_21_P0011585	0.000492996	5.4149	lncRNA	Agilent_HUMAN_G3V2	BC034720	chr17	26257008	26257067	-	NA	NA	NA	Unknown
CUST_20401_PI429285431	0.0335401	5.36272	lncRNA	lncipedia2.1	>lnc-BRD1-4:1	chr22	49968993	49971371	-	NA	NA	NA	inter
CUST_51331_PI429285431	0.0184717	5.28197	lncRNA	UCSC	>hg19_lincRNAsTranscripts_TCONS_l2_00009129 range=chr15:59698610-59702722 5'pad=0 3'pad=0 strand=- repeatMasking=none	chr15	59698610	59700392	-	NA	hg19_refFlat_ZNF701:range=chr19:53075495-530867105'pad=0,hg19_refFlat_ZNF701:range=chr19:53075495-530867105'pad=0 3'pad=0 strand=+ repeatMasking=none,-89.60;hg19_refFlat_FAM122C:range=chrX:133941629-1339434035'pad=0,hg19_refFlat_FAM122C:range=chrX:133941629-1339434035'pad=0 3'pad=0 strand=+ repeatMasking=none,-86.10;hg19_refFlat_SLC3A2:range=chr11:62623742-626561655'pad=0,hg19_refFlat_SLC3A2:rang…	NA	inter
CUST_26619_PI429285431	0.0165539	5.17513	lncRNA	lncipedia2.1	>lnc-ZNF705A-1:6	chr12	8368402	8369079	+	FAM90A1	NA	chr12:8373856-8378631	inter
LNCA_21_P0013114	0.00876819	5.17332	lncRNA	Agilent_HUMAN_G3V2	AK125910	chr6	160899678	160901199	-	NA	NA	NA	Unknown
CUST_32588_PI429285431	0.0158583	5.12258	lncRNA	NONCODERv3	>n339208|AK023784|mRNAlikelncRNA|Homosapiens|HumanlncRNA|JounralRNA|1640|NULL|-0.7793830|-0.2186507	chr16	50674503	50674651	+	NKD1	NA	chr16:50661503-50674771	inner
CUST_35301_PI429285431	0.0268137	5.04979	lncRNA	NONCODERv3	>n342322|AK024584|mRNAlikelncRNA|Homosapiens|HumanlncRNA|JounralRNA|4814|NULL|2.2986400|-0.3868833	chr14	52753176	52754690	+	PTGDR	hg19_refFlat_CSF2RA:range=chrX:1401597-14283725'pad=0,hg19_refFlat_CSF2RA:range=chrX:1401597-14283725'pad=0 3'pad=0 strand=+ repeatMasking=none,-77.70;hg19_refFlat_BCAS4:range=chr20:49411531-494930725'pad=0,hg19_refFlat_BCAS4:range=chr20:49411531-494930725'pad=0 3'pad=0 strand=+ repeatMasking=none,-74.90;hg19_refFlat_FAM76A:range=chr1:28052592-280870925'pad=0,hg19_refFlat_FAM76A:range=chr1:280525…	NA	inter
CUST_45643_PI429285431	0.0381029	5.00213	lncRNA	ncbi	>gi|226061013|ref|NR_027430.1| Homo sapiens uncharacterized LOC219347 (LOC219347), transcript variant 3, non-coding RNA	Chr10	81808989	81809836	-	NA	hg19_refFlat_ZNF410:range=chr14:74358879-743915065'pad=0,hg19_refFlat_ZNF410:range=chr14:74358879-743915065'pad=0 3'pad=0 strand=+ repeatMasking=none,-85.50;hg19_refFlat_ZNF573:range=chr19:38229393-382492365'pad=0,hg19_refFlat_ZNF573:range=chr19:38229393-382492365'pad=0 3'pad=0 strand=- repeatMasking=none,-80.30;hg19_refFlat_RPP30:range=chr10:92631744-926630195'pad=0,hg19_refFlat_RPP30:range=chr1…	NA	inter
CUST_34777_PI429285431	0.00467875	5.00115	lncRNA	NONCODERv3	>n341684|AL832569|mRNAlikelncRNA|Homosapiens|HumanlncRNA|JounralRNA|4155|NULL|1.3840500|-0.2047240	chr9	35864734	35865547	+	TMEM8B	hg19_refFlat_OR1N2:range=chr9:125315449-1253164415'pad=0,hg19_refFlat_OR1N2:range=chr9:125315449-1253164415'pad=0 3'pad=0 strand=+ repeatMasking=none,-73.40;hg19_refFlat_HIF3A:range=chr19:46807190-468415635'pad=0,hg19_refFlat_HIF3A:range=chr19:46807190-468415635'pad=0 3'pad=0 strand=+ repeatMasking=none,-66.70chr9:35848734-35854844	NA	inter
CUST_47631_PI429285431	0.0227797	4.96348	lncRNA	ncbi	>gi|337298625|ref|NR_038978.1| Homo sapiens MORF4L2 antisense RNA 1 (MORF4L2-AS1), non-coding RNA	ChrX	102942212	102945090	+	NA	NA	NA	inter
CUST_39423_PI429285431	0.00502993	4.93668	lncRNA	NONCODERv3	>n386722|NULL|lncRNA|Homosapiens||UCSCGeneNoncode|uc010tcj.1||1.6736300|-0.3861843	chr13	19414542	19417541	-	NA	hg19_refFlat_ASMT:range=chrY:1684093-17119075'pad=0,hg19_refFlat_ASMT:range=chrY:1684093-17119075'pad=0 3'pad=0 strand=+ repeatMasking=none,-50.50;hg19_refFlat_BRD2:range=chr6_cox_hap2:4385214-43930395'pad=0,hg19_refFlat_BRD2:range=chr6_cox_hap2:4385214-43930395'pad=0 3'pad=0 strand=+ repeatMasking=none,-81.40;hg19_refFlat_TSFM:range=chr12:58176585-581903665'pad=0,hg19_refFlat_TSFM:range=chr12:58…	NA	inter
CUST_33781_PI429285431	0.020937	4.93629	lncRNA	NONCODERv3	>n340568|AK024229|mRNAlikelncRNA|Homosapiens|HumanlncRNA|JounralRNA|3030|NULL|-0.9033330|-0.1620876	chr17	21320481	21323180	+	KCNJ12	NA	chr17:21310481-21323179	inner
CUST_49887_PI429285431	0.001083	4.92816	lncRNA	UCSC	>hg19_lincRNAsTranscripts_TCONS_l2_00026700 range=chr7:76684553-76702721 5'pad=0 3'pad=0 strand=- repeatMasking=none	chr7	76690553	76693552	-	LOC100505767	hg19_refFlat_C8orf44:range=chr8:67589944-675921895'pad=0,hg19_refFlat_C8orf44:range=chr8:67589944-675921895'pad=0 3'pad=0 strand=+ repeatMasking=none,-83.60;hg19_refFlat_GDPD2:range=chrX:69644835-696529365'pad=0,hg19_refFlat_GDPD2:range=chrX:69644835-696529365'pad=0 3'pad=0 strand=+ repeatMasking=none,-84.40;hg19_refFlat_SUGT1:range=chr13:53227056-532619705'pad=0,hg19_refFlat_SUGT1:range=chr13:53…	NA	inter
CUST_15487_PI429285431	0.0203698	4.90735	lncRNA	lncipedia2.1	>lnc-C6orf146-1:2	chr6	4019054	4021421	-	PRPF4B	hg19_refFlat_NANOGNB:range=chr12:7917882-79264475'pad=0,hg19_refFlat_NANOGNB:range=chr12:7917882-79264475'pad=0 3'pad=0 strand=+ repeatMasking=none,-83.30;hg19_refFlat_SEPP1:range=chr5:42800822-428108695'pad=0,hg19_refFlat_SEPP1:range=chr5:42800822-428108695'pad=0 3'pad=0 strand=- repeatMasking=none,-80.60;hg19_refFlat_C8orf44:range=chr8:67589944-675921895'pad=0,hg19_refFlat_C8orf44:range=chr8:67…	NA	inter
CUST_33719_PI429285431	0.0452077	4.90365	lncRNA	NONCODERv3	>n340497|AK090694|mRNAlikelncRNA|Homosapiens|HumanlncRNA|JounralRNA|2958|NULL|-1.0966500|-0.3170054	chr5	71735725	71738212	-	ZNF366	NA	chr5:71739234-71748214	inter
LNCA_21_P0011169	0.0468914	4.90209	lncRNA	Agilent_HUMAN_G3V2	ENST00000453176	chr13	19313198	19314126	-	NA	NA	NA	Unknown
CUST_17613_PI429285431	0.046141	4.88201	lncRNA	lncipedia2.1	>lnc-CXCR3-4:2	chrX	71007123	71008235	-	NA	NA	NA	inter
CUST_8756_PI429285431	0.0127472	4.86605	lncRNA	lncipedia2.1	>lnc-C17orf66-1:1	chr17	34156442	34157948	-	TAF15	hg19_refFlat_C8orf44:range=chr8:67589944-675921895'pad=0,hg19_refFlat_C8orf44:range=chr8:67589944-675921895'pad=0 3'pad=0 strand=+ repeatMasking=none,-74.40;hg19_refFlat_ISY1:range=chr3:128848924-1288798185'pad=0,hg19_refFlat_ISY1:range=chr3:128848924-1288798185'pad=0 3'pad=0 strand=- repeatMasking=none,-82.50;hg19_refFlat_BIRC5:range=chr17:76210398-762196355'pad=0,hg19_refFlat_BIRC5:range=chr17:…	NA	inner
CUST_20455_PI429285431	0.0381376	4.84471	lncRNA	lncipedia2.1	>lnc-PPIAL4G-5:2	chr1	143272622	143273784	-	NA	hg19_refFlat_ASMT:range=chrY:1684093-17119075'pad=0,hg19_refFlat_ASMT:range=chrY:1684093-17119075'pad=0 3'pad=0 strand=+ repeatMasking=none,-38.00;hg19_refFlat_ASMT:range=chrX:1734093-17619075'pad=0,hg19_refFlat_ASMT:range=chrX:1734093-17619075'pad=0 3'pad=0 strand=+ repeatMasking=none,-38.00	NA	inter
CUST_38931_PI429285431	0.0014827	4.83668	lncRNA	NONCODERv3	>n385045|NULL|lncRNA|Homosapiens||UCSCGeneNoncode|uc003qtj.2||3.9554500|-0.1629477	chr6	160887586	160889553	-	NA	NA	NA	inter
CUST_50398_PI429285431	0.0431486	4.82371	lncRNA	UCSC	>hg19_lincRNAsTranscripts_TCONS_l2_00030116 range=chrX:1852853-1861240 5'pad=0 3'pad=0 strand=+ repeatMasking=none	chrX	1852853	1853506	+	NA	hg19_refFlat_CAGE1:range=chr6:7329398-73874065'pad=0,hg19_refFlat_CAGE1:range=chr6:7329398-73874065'pad=0 3'pad=0 strand=- repeatMasking=none,-90.40;hg19_refFlat_YIF1B:range=chr19:38796129-388065575'pad=0,hg19_refFlat_YIF1B:range=chr19:38796129-388065575'pad=0 3'pad=0 strand=- repeatMasking=none,-88.30;hg19_refFlat_FBLIM1:range=chr1:16091479-161015265'pad=0,hg19_refFlat_FBLIM1:range=chr1:16091479…	NA	inter
CUST_33420_PI429285431	0.0019797	4.82244	lncRNA	NONCODERv3	>n340148|AK054890|mRNAlikelncRNA|Homosapiens|HumanlncRNA|JounralRNA|2608|NULL|0.2059120|-0.2921389	chr10	116184203	116187156	-	ABLIM1	NA	chr10:116190869-116197157	inter
CUST_13425_PI429285431	0.00707198	4.81297	lncRNA	lncipedia2.1	>lnc-ZNF8-3:1	chr19	58785732	58786156	+	ZNF8	NA	chr19:58790318-58795962	inter
CUST_44543_PI429285431	0.00549705	4.67883	lncRNA	ncbi	>gi|402478648|ref|NR_073103.1| Homo sapiens integrin, alpha 2 (CD49B, alpha 2 subunit of VLA-2 receptor) (ITGA2), transcript variant 2, non-coding RNA	Chr5	52285156	52288155	+	NA	hg19_refFlat_BCAS4:range=chr20:49411531-494930725'pad=0,hg19_refFlat_BCAS4:range=chr20:49411531-494930725'pad=0 3'pad=0 strand=+ repeatMasking=none,-80.80;hg19_refFlat_KCNRG:range=chr13:50589630-505943635'pad=0,hg19_refFlat_KCNRG:range=chr13:50589630-505943635'pad=0 3'pad=0 strand=+ repeatMasking=none,-79.70;hg19_refFlat_HSD11B1L:range=chr19:5684044-56879565'pad=0,hg19_refFlat_HSD11B1L:range=chr1…	NA	inter
CUST_45561_PI429285431	0.00756275	4.67136	lncRNA	ncbi	>gi|390407645|ref|NR_051997.1| Homo sapiens zinc finger protein 33B pseudogene (LOC100419868), non-coding RNA	Chr10	38082866	38084103	-	NA	NA	NA	inter
CUST_9241_PI429285431	0.0125597	4.65712	lncRNA	lncipedia2.1	>lnc-USP35-1:4	chr11	77884866	77885420	+	KCTD21	hg19_refFlat_NARF:range=chr17:80416680-804460335'pad=0,hg19_refFlat_NARF:range=chr17:80416680-804460335'pad=0 3'pad=0 strand=+ repeatMasking=none,-76.10;hg19_refFlat_KCTD21:range=chr11:77884818-778856005'pad=0,hg19_refFlat_KCTD21:range=chr11:77884818-778856005'pad=0 3'pad=0 strand=- repeatMasking=none,-92.10chr11:77882298-77895023	NA	inner
CUST_20421_PI429285431	0.0212367	4.64439	lncRNA	lncipedia2.1	>lnc-NSUN6-3:1	chr10	18821966	18822378	-	CACNB2	NA	chr10:18811966-18830688	inner
CUST_5162_PI429285431	0.0399949	4.64381	lncRNA	gencode_v17	>transcript_id "ENST00000313807.4" | genecode_v17	chr15	44825691	44828553	-	EIF3J	hg19_refFlat_LOC100507462:range=chr6:139048604-1390946875'pad=0,hg19_refFlat_LOC100507462:range=chr6:139048604-1390946875'pad=0 3'pad=0 strand=- repeatMasking=none,-85.00;hg19_refFlat_LYRM4:range=chr6:5187029-52609665'pad=0,hg19_refFlat_LYRM4:range=chr6:5187029-52609665'pad=0 3'pad=0 strand=- repeatMasking=none,-77.00;hg19_refFlat_MRPL10:range=chr17:45901571-459065865'pad=0,hg19_refFlat_MRPL10:ra…	NA	inter
CUST_51078_PI429285431	0.0116617	4.62073	lncRNA	UCSC	>hg19_lincRNAsTranscripts_TCONS_l2_00007200 range=chr13:52741674-52768686 5'pad=0 3'pad=0 strand=- repeatMasking=none	chr13	52741674	52744673	-	NEK3	hg19_refFlat_CYB561D1:range=chr1:110036762-1100388815'pad=0,hg19_refFlat_CYB561D1:range=chr1:110036762-1100388815'pad=0 3'pad=0 strand=+ repeatMasking=none,-77.30;hg19_refFlat_CC2D2A:range=chr4:15477557-154829095'pad=0,hg19_refFlat_CC2D2A:range=chr4:15477557-154829095'pad=0 3'pad=0 strand=+ repeatMasking=none,-78.00;hg19_refFlat_JAM2:range=chr21:27012134-270866175'pad=0,hg19_refFlat_JAM2:range=ch…	NA	inter
LNCA_21_P0011746	0.0131621	4.61951	lncRNA	Agilent_HUMAN_G3V2	TCONS_l2_00013086	chr19	37176212	37176271	-	NA	NA	NA	Unknown
CUST_2535_PI429285431	0.0111094	4.61553	lncRNA	gencode_v17	>transcript_id "ENST00000573382.2" | genecode_v17	chr6	44184676	44185492	+	SLC29A1	NA	chr6:44187242-44195973	inter
LNCA_21_P0004993	0.0317613	4.60339	lncRNA	Agilent_HUMAN_G3V2	THC2497134	chr6	4016727	4016786	-	NA	NA	NA	Unknown
CUST_51983_PI429285431	0.0123455	4.59261	lncRNA	UCSC	>hg19_lincRNAsTranscripts_TCONS_l2_00017424 range=chr21:15316065-15344450 5'pad=0 3'pad=0 strand=- repeatMasking=none	chr21	15316065	15316816	-	NA	NA	NA	inter
LNCA_21_P0006378	0.0160338	4.58418	lncRNA	Agilent_HUMAN_G3V2	TCONS_00016750	chr9	29197835	29212962	-	NA	NA	NA	Unknown
LNCA_21_P0013585	0.00681383	4.56218	lncRNA	Agilent_HUMAN_G3V2	ENST00000417703	chr9	43064966	43065024	-	NA	NA	NA	Unknown
CUST_51724_PI429285431	0.0110076	4.55889	lncRNA	UCSC	>hg19_lincRNAsTranscripts_TCONS_l2_00011785 range=chr18:14224236-14256204 5'pad=0 3'pad=0 strand=+ repeatMasking=none	chr18	14224236	14227235	+	LOC100652806	NA	chr18:14234721-14249475	inter
CUST_4152_PI429285431	0.03193	4.5356	lncRNA	gencode_v17	>transcript_id "ENST00000602431.1" | genecode_v17	chr12	6852151	6852807	+	MLF2	NA	chr12:6857158-6862636	inter
CUST_52021_PI429285431	0.0364661	4.53103	lncRNA	UCSC	>hg19_lincRNAsTranscripts_TCONS_l2_00017143 range=chr21:15313150-15327543 5'pad=0 3'pad=0 strand=- repeatMasking=none	chr21	15313150	15314629	-	NA	NA	NA	inter
CUST_23691_PI429285431	0.0158899	4.52293	lncRNA	lncipedia2.1	>lnc-PLEKHA3-2:1	chr2	179510454	179510997	+	TTN	hg19_refFlat_TTN:range=chr2:179391739-1796693695'pad=0,hg19_refFlat_TTN:range=chr2:179391739-1796693695'pad=0 3'pad=0 strand=- repeatMasking=none,-80.10chr2:179500454-179520650	NA	inter
CUST_45641_PI429285431	0.0199718	4.51473	lncRNA	ncbi	>gi|226061010|ref|NR_027429.1| Homo sapiens uncharacterized LOC219347 (LOC219347), transcript variant 2, non-coding RNA	Chr10	81808989	81809960	-	NA	hg19_refFlat_PPIL3:range=chr2:201736118-2017523385'pad=0,hg19_refFlat_PPIL3:range=chr2:201736118-2017523385'pad=0 3'pad=0 strand=- repeatMasking=none,-77.20;hg19_refFlat_ASCC1:range=chr10:73862127-739730565'pad=0,hg19_refFlat_ASCC1:range=chr10:73862127-739730565'pad=0 3'pad=0 strand=- repeatMasking=none,-83.40;hg19_refFlat_ZNF700:range=chr19:12037391-120610685'pad=0,hg19_refFlat_ZNF700:range=chr1…	NA	inter
CUST_41226_PI429285431	0.0194988	4.48599	lncRNA	ensembl.GRCh37.72	>ENST00000582617 ncrna:miRNA chromosome:GRCh37:2:87421909:87421982:1 gene:ENSG00000264793 gene_biotype:miRNA transcript_biotype:miRNA	chr2	87421909	87421982	+	NA	NA	NA	inter
CUST_52022_PI429285431	0.0115493	4.48042	lncRNA	UCSC	>hg19_lincRNAsTranscripts_TCONS_l2_00017144 range=chr21:15342220-15352308 5'pad=0 3'pad=0 strand=- repeatMasking=none	chr21	15342220	15342717	-	NA	NA	NA	inter
CUST_36801_PI429285431	0.0278242	4.42753	lncRNA	NONCODERv3	>n345280|NULL|lincRNA|Homosapiens|HumanlincRNA|ScriptureReconstructionLincRNAsByLuo[unpublished]|linc_luo_829|NULL|-1.2988900|-0.3628503	chr14	92221775	92224738	-	NA	NA	NA	inter
CUST_18685_PI429285431	0.0169546	4.41692	lncRNA	lncipedia2.1	>lnc-RASA1-3:4	chr5	87581558	87582105	+	NA	NA	NA	inter
CUST_31221_PI429285431	0.00793268	4.41581	lncRNA	NONCODERv3	>n337669|AF019616|mRNAlikelncRNA|Homosapiens|HumanlncRNA|JounralRNA|51|NULL|-1.3484800|-0.3674197	chr15	25380788	25383205	+	SNRPN	NA	chr15:25370788-25393202	inter
CUST_39353_PI429285431	0.00145254	4.38766	lncRNA	NONCODERv3	>n386440|NULL|lncRNA|Homosapiens||UCSCGeneNoncode|uc010lal.1||1.1334400|-0.1965963	chr7	72336317	72339316	-	NA	hg19_refFlat_ISY1:range=chr3:128848924-1288798185'pad=0,hg19_refFlat_ISY1:range=chr3:128848924-1288798185'pad=0 3'pad=0 strand=- repeatMasking=none,-82.80;hg19_refFlat_MRPL10:range=chr17:45901571-459065865'pad=0,hg19_refFlat_MRPL10:range=chr17:45901571-459065865'pad=0 3'pad=0 strand=- repeatMasking=none,-72.00;hg19_refFlat_BRD2:range=chr6_cox_hap2:4385214-43930395'pad=0,hg19_refFlat_BRD2:range=ch…	NA	inter
CUST_36223_PI429285431	0.0370625	4.37579	lncRNA	NONCODERv3	>n344766|NULL|lincRNA|Homosapiens|HumanlincRNA|ScriptureReconstructionLincRNAsByLuo[unpublished]|linc_luo_315|NULL|-1.3189000|-0.2587506	chr14	98395666	98398665	-	NA	NA	NA	inter
CUST_34762_PI429285431	0.0194133	4.34736	lncRNA	NONCODERv3	>n341670|CR618670|mRNAlikelncRNA|Homosapiens|HumanlncRNA|JounralRNA|4141|NULL|-1.2701800|-0.1996450	chr9	27948075	27948745	-	LINGO2	NA	chr9:27948528-27958746	inner
CUST_41024_PI429285431	0.00207136	4.33573	lncRNA	NONCODERv3	>n411650|NR_040113|lncRNA|Homosapiens||RefGeneNoncode|NR_040113||5.5985600|-0.3554412	chr18	14179095	14182094	+	LOC100652806	NA	chr18:14234721-14237049	inter
CUST_21328_PI429285431	0.0194591	4.32965	lncRNA	lncipedia2.1	>lnc-AC021860.1-2:2	chr4	38666415	38667056	-	KLF3	NA	chr4:38665790-38676476	inner
CUST_26089_PI429285431	0.000395049	4.31483	lncRNA	lncipedia2.1	>lnc-PGAM2-1:1	chr7	44047031	44048896	-	SPDYE1	hg19_refFlat_MRPL10:range=chr17:45901571-459065865'pad=0,hg19_refFlat_MRPL10:range=chr17:45901571-459065865'pad=0 3'pad=0 strand=- repeatMasking=none,-80.70;hg19_refFlat_SPDYE2L:range=chr7:102193703-1022016225'pad=0,hg19_refFlat_SPDYE2L:range=chr7:102193703-1022016225'pad=0 3'pad=0 strand=+ repeatMasking=none,-92.30;hg19_refFlat_TEX11:range=chrX:69748945-701173965'pad=0,hg19_refFlat_TEX11:range=c…	NA	inter
CUST_7187_PI429285431	0.00660715	4.3116	lncRNA	gencode_v17	>transcript_id "ENST00000493013.2" | genecode_v17	chr3	113351551	113351827	+	SIDT1	hg19_refFlat_PDLIM5:range=chr4:95376440-953777095'pad=0,hg19_refFlat_PDLIM5:range=chr4:95376440-953777095'pad=0 3'pad=0 strand=+ repeatMasking=none,-88.40;hg19_refFlat_NEK4:range=chr3:52745793-528047625'pad=0,hg19_refFlat_NEK4:range=chr3:52745793-528047625'pad=0 3'pad=0 strand=- repeatMasking=none,-87.60;hg19_refFlat_ADRA1A:range=chr8:26606107-267224865'pad=0,hg19_refFlat_ADRA1A:range=chr8:266061…	NA	inter
CUST_23910_PI429285431	0.00592889	4.30602	lncRNA	lncipedia2.1	>lnc-UTS2-1:1	chr1	7887164	7887993	-	PER3	hg19_refFlat_PER3:range=chr1:7844938-79028155'pad=0,hg19_refFlat_PER3:range=chr1:7844938-79028155'pad=0 3'pad=0 strand=+ repeatMasking=none,-102.30chr1:7877164-7897402	NA	inner
LNCA_21_P0009797	0.00799292	4.29186	lncRNA	Agilent_HUMAN_G3V2	TCONS_00027642	chr19	58783078	58783137	+	NA	NA	NA	Unknown
CUST_37605_PI429285431	0.0262647	4.27964	lncRNA	NONCODERv3	>n346082|NULL|lincRNA|Homosapiens|HumanlincRNA|ScriptureReconstructionLincRNAsByLuo[unpublished]|linc_luo_1632|NULL|-1.2815200|-0.3121371	chr19	56879647	56882243	+	ZNF582	hg19_refFlat_ZNF429:range=chr19:21688574-217208805'pad=0,hg19_refFlat_ZNF429:range=chr19:21688574-217208805'pad=0 3'pad=0 strand=+ repeatMasking=none,-71.60chr19:56894648-56900224	NA	inter
CUST_36276_PI429285431	0.0123972	4.2738	lncRNA	NONCODERv3	>n344806|NULL|lincRNA|Homosapiens|HumanlincRNA|ScriptureReconstructionLincRNAsByLuo[unpublished]|linc_luo_355|NULL|-1.4395800|-0.2253610	chr2	114728116	114729414	+	NA	hg19_refFlat_MRPL10:range=chr17:45901571-459065865'pad=0,hg19_refFlat_MRPL10:range=chr17:45901571-459065865'pad=0 3'pad=0 strand=- repeatMasking=none,-70.60;hg19_refFlat_ASCC1:range=chr10:73862127-739730565'pad=0,hg19_refFlat_ASCC1:range=chr10:73862127-739730565'pad=0 3'pad=0 strand=- repeatMasking=none,-76.70;hg19_refFlat_ZMAT1:range=chrX:101138482-1011736065'pad=0,hg19_refFlat_ZMAT1:range=chrX:…	NA	inter
LNCA_33_P3416787	0.0394517	4.24868	lncRNA	Agilent_HUMAN_G3V2	XR_132931	chr10	44019282	44019341	+	NA	NA	NA	Unknown
CUST_19012_PI429285431	0.0472691	4.23938	lncRNA	lncipedia2.1	>lnc-RNF38-1:1	chr9	36334856	36335243	-	RNF38	hg19_refFlat_LOC100506688:range=chr5:989429-9899595'pad=0,hg19_refFlat_LOC100506688:range=chr5:989429-9899595'pad=0 3'pad=0 strand=- repeatMasking=none,-79.00chr9:36336397-36344969	NA	inter
CUST_411_PI429285431	0.00592966	4.20478	lncRNA	gencode_v17	>transcript_id "ENST00000412492.1" | genecode_v17	chr1	143391526	143391897	+	NA	NA	NA	inter
CUST_24331_PI429285431	0.017552	4.17752	lncRNA	lncipedia2.1	>lnc-GALE-1:2	chr1	24098758	24099216	-	PITHD1	NA	chr1:24104876-24108887	inter
CUST_45639_PI429285431	0.0240701	4.17207	lncRNA	ncbi	>gi|254826701|ref|NR_027431.2| Homo sapiens uncharacterized LOC219347 (LOC219347), transcript variant 4, non-coding RNA	NA	NA	NA	NA	NA	hg19_refFlat_CSF2RA:range=chrY:1351597-13783725'pad=0,hg19_refFlat_CSF2RA:range=chrY:1351597-13783725'pad=0 3'pad=0 strand=+ repeatMasking=none,-78.70;hg19_refFlat_STAP2:range=chr19:4324130-43387505'pad=0,hg19_refFlat_STAP2:range=chr19:4324130-43387505'pad=0 3'pad=0 strand=- repeatMasking=none,-77.20;hg19_refFlat_ZNF410:range=chr14:74358879-743915065'pad=0,hg19_refFlat_ZNF410:range=chr14:74358879…	NA	Unknown
CUST_35717_PI429285431	0.0253687	4.16674	lncRNA	NONCODERv3	>n342883|BC048994|mRNAlikelncRNA|Homosapiens|HumanlncRNA|JounralRNA|5389|NULL|3.1150000|-0.2567595	chr12	8332817	8335453	+	ZNF705A	NA	chr12:8325150-8332642	inter
CUST_45645_PI429285431	0.0154595	4.1572	lncRNA	ncbi	>gi|226060981|ref|NR_027428.1| Homo sapiens uncharacterized LOC219347 (LOC219347), transcript variant 1, non-coding RNA	Chr10	81808989	81810047	-	NA	hg19_refFlat_MAP4K1:range=chr19:39078450-391085355'pad=0,hg19_refFlat_MAP4K1:range=chr19:39078450-391085355'pad=0 3'pad=0 strand=- repeatMasking=none,-78.50;hg19_refFlat_ZNF700:range=chr19:12037391-120610685'pad=0,hg19_refFlat_ZNF700:range=chr19:12037391-120610685'pad=0 3'pad=0 strand=+ repeatMasking=none,-77.20;hg19_refFlat_TMEM254:range=chr10:81838456-818506735'pad=0,hg19_refFlat_TMEM254:range=…	NA	inter
LNCA_21_P0008126	0.0127257	4.15612	lncRNA	Agilent_HUMAN_G3V2	TCONS_00021922	chr13	114944255	114944314	+	NA	NA	NA	Unknown
CUST_45268_PI429285431	0.000229625	4.13657	lncRNA	ncbi	>gi|299890815|ref|NR_033916.1| Homo sapiens hCG1814486 (LOC728724), non-coding RNA	Chr8	130228713	130229876	-	NA	NA	NA	inter
CUST_10561_PI429285431	0.0485395	4.1336	lncRNA	lncipedia2.1	>lnc-TMEM242-1:1	chr6	157542401	157542725	-	NA	NA	NA	inter
CUST_3646_PI429285431	0.0210627	4.10908	lncRNA	gencode_v17	>transcript_id "ENST00000420945.1" | genecode_v17	chr10	31893528	31893948	+	NA	NA	NA	inter
CUST_14210_PI429285431	0.0203462	4.10519	lncRNA	lncipedia2.1	>lnc-C5orf42-1:1	chr5	37072107	37072842	-	NIPBL	NA	chr5:37062107-37065921	inter
CUST_39780_PI429285431	0.0354989	4.09316	lncRNA	NONCODERv3	>n406099|NR_003366|lncRNA|Homosapiens||RefGeneNoncode|NR_003366||10.3075000|-0.2313750	chr2	95426672	95429671	-	NA	NA	NA	inter
LNCA_21_P0008358	0.0133996	4.08638	lncRNA	Agilent_HUMAN_G3V2	ENST00000554225	chr14	76729725	76729784	+	NA	NA	NA	Unknown
CUST_50087_PI429285431	0.00490688	4.07917	lncRNA	UCSC	>hg19_lincRNAsTranscripts_TCONS_l2_00028400 range=chr8:126930983-126934790 5'pad=0 3'pad=0 strand=- repeatMasking=none	chr8	126930983	126933681	-	NA	hg19_refFlat_ASCC1:range=chr10:73862127-739730565'pad=0,hg19_refFlat_ASCC1:range=chr10:73862127-739730565'pad=0 3'pad=0 strand=- repeatMasking=none,-82.40;hg19_refFlat_USP4:range=chr3:49349800-493774575'pad=0,hg19_refFlat_USP4:range=chr3:49349800-493774575'pad=0 3'pad=0 strand=- repeatMasking=none,-82.90;hg19_refFlat_FAM76A:range=chr1:28052592-280870925'pad=0,hg19_refFlat_FAM76A:range=chr1:280525…	NA	inter
CUST_49599_PI429285431	0.0106479	4.07818	lncRNA	UCSC	>hg19_lincRNAsTranscripts_TCONS_l2_00025014 range=chr6:160899538-160941163 5'pad=0 3'pad=0 strand=- repeatMasking=none	chr6	160899538	160900376	-	NA	NA	NA	inter
CUST_36795_PI429285431	0.0164158	4.06645	lncRNA	NONCODERv3	>n345274|NULL|lincRNA|Homosapiens|HumanlincRNA|ScriptureReconstructionLincRNAsByLuo[unpublished]|linc_luo_823|NULL|-1.3532900|-0.3513554	chr14	76701194	76701947	+	NA	NA	NA	inter
CUST_32380_PI429285431	0.00686103	4.06237	lncRNA	NONCODERv3	>n338971|AK095796|mRNAlikelncRNA|Homosapiens|HumanlncRNA|JounralRNA|1399|NULL|0.3894410|-0.1334194	chr19	58571101	58573936	+	ZSCAN18	hg19_refFlat_ZSCAN18:range=chr19:58596052-586016345'pad=0,hg19_refFlat_ZSCAN18:range=chr19:58596052-586016345'pad=0 3'pad=0 strand=- repeatMasking=none,-108.70;hg19_refFlat_ZSCAN18:range=chr19:58596052-586297635'pad=0,hg19_refFlat_ZSCAN18:range=chr19:58596052-586297635'pad=0 3'pad=0 strand=- repeatMasking=none,-108.70;hg19_refFlat_ZSCAN18:range=chr19:58596052-586002025'pad=0,hg19_refFlat_ZSCAN18:…	NA	inner
CUST_38738_PI429285431	0.0124414	4.03222	lncRNA	NONCODERv3	>n384248|NULL|lncRNA|Homosapiens||UCSCGeneNoncode|uc003cpd.1||-0.5315110|-0.2295818	chr3	46061515	46062156	-	XCR1	NA	chr3:46062291-46068979	inter
LNCA_21_P0001674	0.0492806	4.02768	lncRNA	Agilent_HUMAN_G3V2	TCONS_00001990	chr1	39513771	39513830	+	NA	NA	NA	Unknown
CUST_414_PI429285431	0.0173076	4.024	lncRNA	gencode_v17	>transcript_id "ENST00000448844.1" | genecode_v17	chr1	143391568	143392676	+	NA	NA	NA	inter
CUST_29997_PI429285431	0.0488242	4.00625	lncRNA	NONCODERv3	>n334378|S78086|mRNAlikelncRNA|Homosapiens|NULL|H-invitationalv7.5|HIT000216776|http://h-invitational.jp/hinv/spsoup/transcript_view?hit_id=HIT000216776|2.7886300|-0.0378025	chr19	5208249	5208514	-	PTPRS	NA	chr19:5205519-5220593	inner
CUST_34854_PI429285431	0.0148173	3.99797	lncRNA	NONCODERv3	>n341760|AF131806|mRNAlikelncRNA|Homosapiens|HumanlncRNA|JounralRNA|4234|NULL|-0.7381060|-0.1812757	chr9	116304732	116306572	+	RGS3	NA	chr9:116294732-116316551	inner
CUST_39272_PI429285431	0.00569062	3.99124	lncRNA	NONCODERv3	>n386210|NULL|lncRNA|Homosapiens||UCSCGeneNoncode|uc010edb.1||2.4961700|-0.2338228	chr19	24344994	24346248	-	NA	NA	NA	inter
CUST_47847_PI429285431	0.008056	3.96317	lncRNA	ncbi	>gi|197100147|ref|NR_024086.1| Homo sapiens COPG2 imprinted transcript 1 (non-protein coding) (COPG2IT1), non-coding RNA	NA	NA	NA	NA	NA	NA	NA	Unknown
CUST_49404_PI429285431	0.0180713	3.9623	lncRNA	UCSC	>hg19_lincRNAsTranscripts_TCONS_l2_00023600 range=chr5:175547850-175559261 5'pad=0 3'pad=0 strand=+ repeatMasking=none	chr5	175547850	175550520	+	FAM153B	hg19_refFlat_SUGT1:range=chr13:53227056-532619705'pad=0,hg19_refFlat_SUGT1:range=chr13:53227056-532619705'pad=0 3'pad=0 strand=+ repeatMasking=none,-79.80;hg19_refFlat_FAM76A:range=chr1:28052592-280870925'pad=0,hg19_refFlat_FAM76A:range=chr1:28052592-280870925'pad=0 3'pad=0 strand=+ repeatMasking=none,-47.20;hg19_refFlat_PODXL:range=chr7:131189070-1312411185'pad=0,hg19_refFlat_PODXL:range=chr7:13…	NA	inter
CUST_47928_PI429285431	0.0102891	3.93618	lncRNA	ncbi	>gi|410172225|ref|XR_171672.1| PREDICTED: Homo sapiens uncharacterized LOC101060276 (LOC101060276), misc_RNA	NA	NA	NA	NA	NA	hg19_refFlat_SPDYE5:range=chr7:75124435-751312615'pad=0,hg19_refFlat_SPDYE5:range=chr7:75124435-751312615'pad=0 3'pad=0 strand=+ repeatMasking=none,-86.30;hg19_refFlat_JAM2:range=chr21:27012134-270866175'pad=0,hg19_refFlat_JAM2:range=chr21:27012134-270866175'pad=0 3'pad=0 strand=+ repeatMasking=none,-81.00;hg19_refFlat_ZNF429:range=chr19:21688574-217208805'pad=0,hg19_refFlat_ZNF429:range=chr19:21…	NA	Unknown
LNCA_21_P0014804	0.0314693	3.93372	lncRNA	Agilent_HUMAN_G3V2	XR_132622	chr16	74339469	74343955	-	NA	NA	NA	Unknown
CUST_45644_PI429285431	0.0467079	3.90223	lncRNA	ncbi	>gi|226060981|ref|NR_027428.1| Homo sapiens uncharacterized LOC219347 (LOC219347), transcript variant 1, non-coding RNA	Chr10	81805989	81808988	-	NA	hg19_refFlat_MAP4K1:range=chr19:39078450-391085355'pad=0,hg19_refFlat_MAP4K1:range=chr19:39078450-391085355'pad=0 3'pad=0 strand=- repeatMasking=none,-78.50;hg19_refFlat_ZNF700:range=chr19:12037391-120610685'pad=0,hg19_refFlat_ZNF700:range=chr19:12037391-120610685'pad=0 3'pad=0 strand=+ repeatMasking=none,-77.20;hg19_refFlat_TMEM254:range=chr10:81838456-818506735'pad=0,hg19_refFlat_TMEM254:range=…	NA	inter
CUST_44538_PI429285431	0.00959417	3.8891	lncRNA	ncbi	>gi|402478651|ref|NR_073105.1| Homo sapiens integrin, alpha 2 (CD49B, alpha 2 subunit of VLA-2 receptor) (ITGA2), transcript variant 4, non-coding RNA	Chr5	52288156	52291155	+	NA	hg19_refFlat_TCEANC:range=chrX:13677806-136816835'pad=0,hg19_refFlat_TCEANC:range=chrX:13677806-136816835'pad=0 3'pad=0 strand=+ repeatMasking=none,-77.90;hg19_refFlat_TRIM61:range=chr4:165876144-1658911545'pad=0,hg19_refFlat_TRIM61:range=chr4:165876144-1658911545'pad=0 3'pad=0 strand=- repeatMasking=none,-76.40;hg19_refFlat_ZNF700:range=chr19:12037391-120610685'pad=0,hg19_refFlat_ZNF700:range=ch…	NA	inter
CUST_47190_PI429285431	0.0488354	3.88426	lncRNA	ncbi	>gi|291621684|ref|NR_033418.1| Homo sapiens zinc finger protein 542 (ZNF542), transcript variant 1, non-coding RNA	Chr19	56882490	56883241	+	NA	hg19_refFlat_ZNF429:range=chr19:21688574-217208805'pad=0,hg19_refFlat_ZNF429:range=chr19:21688574-217208805'pad=0 3'pad=0 strand=+ repeatMasking=none,-71.60	NA	inter
LNCA_21_P0013325	0.0166609	3.88003	lncRNA	Agilent_HUMAN_G3V2	THC2534069	chr7	65991014	65991073	-	NA	NA	NA	Unknown
CUST_8099_PI429285431	0.0174859	3.87991	lncRNA	lncipedia2.1	>lnc-BLID-3:1	chr11	121323384	121326291	-	SORL1	hg19_refFlat_ZNF283:range=chr19:44337657-443527935'pad=0,hg19_refFlat_ZNF283:range=chr19:44337657-443527935'pad=0 3'pad=0 strand=+ repeatMasking=none,-88.30;hg19_refFlat_C21orf7:range=chr21:30458182-305472135'pad=0,hg19_refFlat_C21orf7:range=chr21:30458182-305472135'pad=0 3'pad=0 strand=+ repeatMasking=none,-67.50;hg19_refFlat_MKNK1:range=chr1:47024247-470598185'pad=0,hg19_refFlat_MKNK1:range=chr…	NA	inner
CUST_33962_PI429285431	0.0290257	3.86175	lncRNA	NONCODERv3	>n340770|AX721088|mRNAlikelncRNA|Homosapiens|HumanlncRNA|JounralRNA|3233|NULL|-0.9478140|-0.1405385	chr17	56408244	56409885	-	BZRAP1	NA	chr17:56398244-56406152	inter
CUST_45553_PI429285431	0.0125972	3.83392	lncRNA	ncbi	>gi|350276251|ref|NR_045259.1| Homo sapiens neuropilin 1 (NRP1), transcript variant 6, non-coding RNA	NA	NA	NA	NA	NA	NA	NA	Unknown
LNCA_21_P0010559	0.0400631	3.78506	lncRNA	Agilent_HUMAN_G3V2	TCONS_l2_00000590	chr1	149239626	149239685	+	NA	NA	NA	Unknown
CUST_27493_PI429285431	0.0150038	3.77869	lncRNA	NONCODERv3	>n324671|NULL|mRNAlikelncRNA|Homosapiens|vegalncRNA|GENCODE|OTTHUMT00000128992|http://vega.sanger.ac.uk/Homo_sapiens/Transcript/Summary?db=core;t=OTTHUMT00000128992|-0.9231610|-0.1556895	chr22	31831368	31831804	-	EIF4ENIF1	hg19_refFlat_C8orf44:range=chr8:67589944-675921895'pad=0,hg19_refFlat_C8orf44:range=chr8:67589944-675921895'pad=0 3'pad=0 strand=+ repeatMasking=none,-76.90;hg19_refFlat_SEPP1:range=chr5:42800822-428108695'pad=0,hg19_refFlat_SEPP1:range=chr5:42800822-428108695'pad=0 3'pad=0 strand=- repeatMasking=none,-76.70chr22:31835345-31842045	NA	inter
CUST_46341_PI429285431	0.0357273	3.77339	lncRNA	ncbi	>gi|210147561|ref|NR_024334.1| Homo sapiens FUT8 antisense RNA 1 (FUT8-AS1), non-coding RNA	Chr14	65877310	65879335	-	NA	NA	NA	inter
CUST_12428_PI429285431	0.004261	3.76528	lncRNA	lncipedia2.1	>lnc-KIDINS220-6:2	chr2	8502308	8502915	-	NA	NA	NA	inter
CUST_8108_PI429285431	0.0366708	3.76263	lncRNA	lncipedia2.1	>lnc-RPGRIP1-2:1	chr14	21669731	21672730	+	HNRNPC	hg19_refFlat_WDR27:range=chr6:169857687-1700891015'pad=0,hg19_refFlat_WDR27:range=chr6:169857687-1700891015'pad=0 3'pad=0 strand=- repeatMasking=none,-73.20;hg19_refFlat_NEK5:range=chr13:52639543-527016185'pad=0,hg19_refFlat_NEK5:range=chr13:52639543-527016185'pad=0 3'pad=0 strand=- repeatMasking=none,-69.60;hg19_refFlat_OSTC:range=chr4:109571812-1095884135'pad=0,hg19_refFlat_OSTC:range=chr4:1095…	NA	inter
CUST_24617_PI429285431	0.0179839	3.74242	lncRNA	lncipedia2.1	>lnc-BRD1-3:1	chr22	50009224	50012198	-	NA	NA	NA	inter
CUST_12421_PI429285431	0.0365998	3.73792	lncRNA	lncipedia2.1	>lnc-NDUFS5-2:1	chr1	39513563	39514288	+	NA	NA	NA	inter
CUST_49888_PI429285431	0.0296201	3.71948	lncRNA	UCSC	>hg19_lincRNAsTranscripts_TCONS_l2_00026700 range=chr7:76684553-76702721 5'pad=0 3'pad=0 strand=- repeatMasking=none	chr7	76693553	76696552	-	LOC100505767	hg19_refFlat_C8orf44:range=chr8:67589944-675921895'pad=0,hg19_refFlat_C8orf44:range=chr8:67589944-675921895'pad=0 3'pad=0 strand=+ repeatMasking=none,-83.60;hg19_refFlat_GDPD2:range=chrX:69644835-696529365'pad=0,hg19_refFlat_GDPD2:range=chrX:69644835-696529365'pad=0 3'pad=0 strand=+ repeatMasking=none,-84.40;hg19_refFlat_SUGT1:range=chr13:53227056-532619705'pad=0,hg19_refFlat_SUGT1:range=chr13:53…	NA	inter
LNCA_21_P0008900	0.0225916	3.71497	lncRNA	Agilent_HUMAN_G3V2	TCONS_00024310	chr16	900302	900600	+	NA	NA	NA	Unknown
CUST_45738_PI429285431	0.0137071	3.71224	lncRNA	ncbi	>gi|397139391|ref|XR_158864.1| PREDICTED: Homo sapiens uncharacterized LOC100505870 (LOC100505870), misc_RNA	NA	NA	NA	NA	NA	NA	NA	Unknown
CUST_24035_PI429285431	0.0343235	3.70698	lncRNA	lncipedia2.1	>lnc-DHRS7B-1:1	chr17	21133086	21133572	+	C17orf103	NA	chr17:21142183-21143348	inter
CUST_49847_PI429285431	0.00647084	3.70208	lncRNA	UCSC	>hg19_lincRNAsTranscripts_TCONS_l2_00026657 range=chr7:65982683-66057999 5'pad=0 3'pad=0 strand=- repeatMasking=none	chr7	65991683	65994682	-	NA	hg19_refFlat_PPIP5K1:range=chr15:43826872-438767025'pad=0,hg19_refFlat_PPIP5K1:range=chr15:43826872-438767025'pad=0 3'pad=0 strand=- repeatMasking=none,-51.50;hg19_refFlat_NANOGNB:range=chr12:7917882-79264475'pad=0,hg19_refFlat_NANOGNB:range=chr12:7917882-79264475'pad=0 3'pad=0 strand=+ repeatMasking=none,-92.10;hg19_refFlat_ZNF410:range=chr14:74364945-743982125'pad=0,hg19_refFlat_ZNF410:range=ch…	NA	inter
CUST_8196_PI429285431	0.0151072	3.69402	lncRNA	lncipedia2.1	>lnc-AC021066.1-3:2	chr12	53010348	53011155	+	KRT73	hg19_refFlat_KRT73:range=chr12:53001980-530123085'pad=0,hg19_refFlat_KRT73:range=chr12:53001980-530123085'pad=0 3'pad=0 strand=- repeatMasking=none,-100.60;hg19_refFlat_CYB561D1:range=chr1:110036762-1100388815'pad=0,hg19_refFlat_CYB561D1:range=chr1:110036762-1100388815'pad=0 3'pad=0 strand=+ repeatMasking=none,-78.90;hg19_refFlat_CYB561D1:range=chr1:110036762-1100384895'pad=0,hg19_refFlat_CYB561D…	NA	inner
LNCA_21_P0003930	0.0258914	3.69013	lncRNA	Agilent_HUMAN_G3V2	THC2506711	chr5	139552474	139552533	+	NA	NA	NA	Unknown
CUST_39354_PI429285431	0.000436039	3.67887	lncRNA	NONCODERv3	>n386440|NULL|lncRNA|Homosapiens||UCSCGeneNoncode|uc010lal.1||1.1334400|-0.1965963	chr7	72339317	72339654	-	NA	hg19_refFlat_ISY1:range=chr3:128848924-1288798185'pad=0,hg19_refFlat_ISY1:range=chr3:128848924-1288798185'pad=0 3'pad=0 strand=- repeatMasking=none,-82.80;hg19_refFlat_MRPL10:range=chr17:45901571-459065865'pad=0,hg19_refFlat_MRPL10:range=chr17:45901571-459065865'pad=0 3'pad=0 strand=- repeatMasking=none,-72.00;hg19_refFlat_BRD2:range=chr6_cox_hap2:4385214-43930395'pad=0,hg19_refFlat_BRD2:range=ch…	NA	inter
CUST_46011_PI429285431	0.0253319	3.66405	lncRNA	ncbi	>gi|310122867|ref|XR_109095.1| PREDICTED: Homo sapiens uncharacterized LOC100506606 (LOC100506606), misc_RNA	NA	NA	NA	NA	NA	hg19_refFlat_METTL10:range=chr10:126449072-1264804025'pad=0,hg19_refFlat_METTL10:range=chr10:126449072-1264804025'pad=0 3'pad=0 strand=- repeatMasking=none,-72.30;hg19_refFlat_FAR2:range=chr12:29423383-294867275'pad=0,hg19_refFlat_FAR2:range=chr12:29423383-294867275'pad=0 3'pad=0 strand=+ repeatMasking=none,-83.80;hg19_refFlat_FAR2:range=chr12:29446335-294867275'pad=0,hg19_refFlat_FAR2:range=chr1…	NA	Unknown
CUST_49602_PI429285431	0.00637074	3.65516	lncRNA	UCSC	>hg19_lincRNAsTranscripts_TCONS_l2_00025531 range=chr6:160921638-160922375 5'pad=0 3'pad=0 strand=- repeatMasking=none	chr6	160921638	160922108	-	NA	NA	NA	inter
CUST_10857_PI429285431	0.0130584	3.65497	lncRNA	lncipedia2.1	>lnc-PTPRE-1:1	chr10	130115187	130118186	+	NA	NA	NA	inter
CUST_18383_PI429285431	0.00931029	3.65045	lncRNA	lncipedia2.1	>lnc-MST1P9-2:2	chr1	16974141	16977074	-	NA	hg19_refFlat_ADAMTS2:range=chr5:178578130-1787723295'pad=0,hg19_refFlat_ADAMTS2:range=chr5:178578130-1787723295'pad=0 3'pad=0 strand=- repeatMasking=none,-86.20;hg19_refFlat_NXNL2:range=chr9:91150350-911861075'pad=0,hg19_refFlat_NXNL2:range=chr9:91150350-911861075'pad=0 3'pad=0 strand=+ repeatMasking=none,-89.30;hg19_refFlat_MAP4K1:range=chr19:39078450-391085355'pad=0,hg19_refFlat_MAP4K1:range=ch…	NA	inter
CUST_13297_PI429285431	0.0226522	3.64934	lncRNA	lncipedia2.1	>lnc-STX18-1:3	chr4	4577478	4578518	-	NA	NA	NA	inter
CUST_49402_PI429285431	0.0188252	3.64589	lncRNA	UCSC	>hg19_lincRNAsTranscripts_TCONS_l2_00022644 range=chr5:175545619-175554278 5'pad=0 3'pad=0 strand=+ repeatMasking=none	chr5	175548619	175549598	+	FAM153B	hg19_refFlat_KIAA0586:range=chr14:58896137-590146505'pad=0,hg19_refFlat_KIAA0586:range=chr14:58896137-590146505'pad=0 3'pad=0 strand=+ repeatMasking=none,-33.50;hg19_refFlat_SLC38A6:range=chr14:61447996-615504305'pad=0,hg19_refFlat_SLC38A6:range=chr14:61447996-615504305'pad=0 3'pad=0 strand=+ repeatMasking=none,-75.20;hg19_refFlat_KIAA0586:range=chr14:58894347-590146945'pad=0,hg19_refFlat_KIAA058…	NA	inter
CUST_2448_PI429285431	0.0144423	3.64266	lncRNA	gencode_v17	>transcript_id "ENST00000515739.1" | genecode_v17	chr5	177228205	177228888	-	NA	NA	NA	inter
CUST_47191_PI429285431	0.0371458	3.63637	lncRNA	ncbi	>gi|291621683|ref|NR_024057.2| Homo sapiens zinc finger protein 542 (ZNF542), transcript variant 3, non-coding RNA	Chr19	56879490	56882489	+	NA	hg19_refFlat_ZNF429:range=chr19:21688574-217208805'pad=0,hg19_refFlat_ZNF429:range=chr19:21688574-217208805'pad=0 3'pad=0 strand=+ repeatMasking=none,-71.60	NA	inter
CUST_47789_PI429285431	0.0333892	3.63185	lncRNA	ncbi	>gi|346644734|ref|NR_045128.1| Homo sapiens taxilin gamma 2, pseudogene (TXLNG2P), transcript variant 1, non-coding RNA	ChrY	21732244	21733891	+	NA	NA	NA	inter
CUST_49737_PI429285431	0.0198581	3.62663	lncRNA	UCSC	>hg19_lincRNAsTranscripts_TCONS_l2_00026511 range=chr7:38391053-38394123 5'pad=0 3'pad=0 strand=- repeatMasking=none	chr7	38391053	38394008	-	NA	NA	NA	inter
LNCA_21_P0008695	0.0206911	3.62496	lncRNA	Agilent_HUMAN_G3V2	TCONS_00023549	chr15	100379339	100379398	+	NA	NA	NA	Unknown
CUST_48099_PI429285431	0.00863101	3.62455	lncRNA	ncbi	>gi|397138432|ref|XR_159492.1| PREDICTED: Homo sapiens uncharacterized LOC100996815 (LOC100996815), misc_RNA	NA	NA	NA	NA	NA	NA	NA	Unknown
CUST_12702_PI429285431	0.0150753	3.61594	lncRNA	lncipedia2.1	>lnc-CDC16-1:1	chr13	114944538	114944869	+	NA	NA	NA	inter
CUST_49851_PI429285431	0.0335051	3.6108	lncRNA	UCSC	>hg19_lincRNAsTranscripts_TCONS_l2_00026658 range=chr7:65990896-66038537 5'pad=0 3'pad=0 strand=- repeatMasking=none	chr7	65993896	65995624	-	NA	hg19_refFlat_CNGA1:range=chr4:47938438-479731175'pad=0,hg19_refFlat_CNGA1:range=chr4:47938438-479731175'pad=0 3'pad=0 strand=- repeatMasking=none,-86.00;hg19_refFlat_THEMIS:range=chr6:128031130-1282220775'pad=0,hg19_refFlat_THEMIS:range=chr6:128031130-1282220775'pad=0 3'pad=0 strand=- repeatMasking=none,-44.40;hg19_refFlat_MYL10:range=chr7:101256755-1012723985'pad=0,hg19_refFlat_MYL10:range=chr7:…	NA	inter
CUST_38150_PI429285431	0.00610122	3.60986	lncRNA	NONCODERv3	>n381354|NULL|lncRNA|Homosapiens||UCSCGeneNoncode|uc001hor.1||-1.1840000|-0.2407793	chr1	224622613	224623997	+	WDR26	NA	chr1:224612613-224622001	inter
CUST_34790_PI429285431	0.0371605	3.59494	lncRNA	NONCODERv3	>n341697|AL713639|mRNAlikelncRNA|Homosapiens|HumanlncRNA|JounralRNA|4168|NULL|-1.0566600|-0.2516428	chr9	72042448	72044770	-	APBA1	NA	chr9:72042449-72054751	inner
CUST_18703_PI429285431	0.0197296	3.59178	lncRNA	lncipedia2.1	>lnc-YBEY-2:1	chr21	47669500	47672038	+	MCM3AP	hg19_refFlat_MCM3AP:range=chr21:47655182-477052005'pad=0,hg19_refFlat_MCM3AP:range=chr21:47655182-477052005'pad=0 3'pad=0 strand=- repeatMasking=none,-90.00chr21:47659500-47681615	NA	inner
CUST_20614_PI429285431	0.0119422	3.58566	lncRNA	lncipedia2.1	>lnc-TRPV1-1:1	chr17	3505055	3505566	-	SHPK	hg19_refFlat_DISC1:range=chr1:231762614-2319907715'pad=0,hg19_refFlat_DISC1:range=chr1:231762614-2319907715'pad=0 3'pad=0 strand=+ repeatMasking=none,-69.20chr17:3511556-3515566	NA	inner
CUST_291_PI429201921	0.00808912	3.57048	lncRNA	Affy_HUMAN_HTA2.0	linc-DEFB105B-4	chr8	7847937	7855043	-	SCMH1	NA	chr1:41698045-41707815	Unknown
CUST_51989_PI429285431	0.024127	3.57004	lncRNA	UCSC	>hg19_lincRNAsTranscripts_TCONS_l2_00017186 range=chr21:29750553-30144463 5'pad=0 3'pad=0 strand=- repeatMasking=none	chr21	29750553	29752019	-	NA	NA	NA	inter
LNCA_21_P0005345	0.0408396	3.56295	lncRNA	Agilent_HUMAN_G3V2	TCONS_00014043	chr7	391200	391259	+	NA	NA	NA	Unknown
LNCA_21_P0012219	0.0222763	3.55694	lncRNA	Agilent_HUMAN_G3V2	TCONS_l2_00017422	chr21	15304586	15304669	-	NA	NA	NA	Unknown
CUST_732_PI429285431	0.0267032	3.55413	lncRNA	gencode_v17	>transcript_id "ENST00000444688.1" | genecode_v17	chr2	8452939	8453475	-	NA	NA	NA	inter
CUST_44542_PI429285431	0.0155968	3.54439	lncRNA	ncbi	>gi|402478650|ref|NR_073106.1| Homo sapiens integrin, alpha 2 (CD49B, alpha 2 subunit of VLA-2 receptor) (ITGA2), transcript variant 5, non-coding RNA	Chr5	52291156	52293025	+	NA	hg19_refFlat_RQCD1:range=chr2:219433678-2194589995'pad=0,hg19_refFlat_RQCD1:range=chr2:219433678-2194589995'pad=0 3'pad=0 strand=+ repeatMasking=none,-45.10;hg19_refFlat_BRD2:range=chr6_qbl_hap6:4172820-41806325'pad=0,hg19_refFlat_BRD2:range=chr6_qbl_hap6:4172820-41806325'pad=0 3'pad=0 strand=+ repeatMasking=none,-83.50;hg19_refFlat_TRIM61:range=chr4:165876144-1658911545'pad=0,hg19_refFlat_TRIM61…	NA	inter
LNCA_21_P0002058	0.0198276	3.52789	lncRNA	Agilent_HUMAN_G3V2	ENST00000430134	chr2	65257884	65257943	-	NA	NA	NA	Unknown
CUST_39242_PI429285431	0.00653279	3.5278	lncRNA	NONCODERv3	>n386097|NULL|lncRNA|Homosapiens||UCSCGeneNoncode|uc010ayz.1||-0.8617970|-0.3580640	chr15	28834637	28835659	+	NA	NA	NA	inter
CUST_44544_PI429285431	0.010197	3.52755	lncRNA	ncbi	>gi|402478648|ref|NR_073103.1| Homo sapiens integrin, alpha 2 (CD49B, alpha 2 subunit of VLA-2 receptor) (ITGA2), transcript variant 2, non-coding RNA	Chr5	52288156	52291155	+	NA	hg19_refFlat_BCAS4:range=chr20:49411531-494930725'pad=0,hg19_refFlat_BCAS4:range=chr20:49411531-494930725'pad=0 3'pad=0 strand=+ repeatMasking=none,-80.80;hg19_refFlat_KCNRG:range=chr13:50589630-505943635'pad=0,hg19_refFlat_KCNRG:range=chr13:50589630-505943635'pad=0 3'pad=0 strand=+ repeatMasking=none,-79.70;hg19_refFlat_HSD11B1L:range=chr19:5684044-56879565'pad=0,hg19_refFlat_HSD11B1L:range=chr1…	NA	inter
CUST_20678_PI429285431	0.0398704	3.52123	lncRNA	lncipedia2.1	>lnc-HADH-1:6	chr4	109097446	109097889	+	LEF1	NA	chr4:109087446-109090112	inter
CUST_46989_PI429285431	0.0156654	3.52031	lncRNA	ncbi	>gi|310123750|ref|XR_109474.1| PREDICTED: Homo sapiens uncharacterized LOC100506821 (LOC100506821), misc_RNA	NA	NA	NA	NA	NA	NA	NA	Unknown
CUST_43215_PI429285431	0.0376037	3.50644	lncRNA	ensembl.GRCh37.72	>ENST00000602474 havana:sense_intronic chromosome:GRCh37:12:124447102:124447364:-1 gene:ENSG00000270048 gene_biotype:sense_intronic transcript_biotype:sense_intronic	chr12	124447102	124447364	-	CCDC92	NA	chr12:124437102-124457163	inner
CUST_49109_PI429285431	0.017346	3.50474	lncRNA	UCSC	>hg19_lincRNAsTranscripts_TCONS_l2_00021132 range=chr4:49244795-49247226 5'pad=0 3'pad=0 strand=- repeatMasking=none	chr4	49244795	49245041	-	NA	NA	NA	inter
CUST_27155_PI429285431	0.0278672	3.50249	lncRNA	NONCODERv3	>n324279|NULL|mRNAlikelncRNA|Homosapiens|vegalncRNA|GENCODE|OTTHUMT00000043282|http://vega.sanger.ac.uk/Homo_sapiens/Transcript/Summary?db=core;t=OTTHUMT00000043282|-0.8215990|-0.3535754	chr6	170886763	170887095	+	PDCD2	hg19_refFlat_PDCD2:range=chr6:170886647-1708936695'pad=0,hg19_refFlat_PDCD2:range=chr6:170886647-1708936695'pad=0 3'pad=0 strand=- repeatMasking=none,-84.40chr6:170884660-170893780	NA	inner
CUST_4617_PI429285431	0.0444876	3.49603	lncRNA	gencode_v17	>transcript_id "ENST00000420693.1" | genecode_v17	chr13	45924458	45924767	+	TPT1	NA	chr13:45914458-45915297	inter
LNCA_21_P0007637	0.00313092	3.49563	lncRNA	Agilent_HUMAN_G3V2	TCONS_00020582	chr12	116974466	116974525	+	NA	NA	NA	Unknown
LNCA_21_P0013168	0.0264249	3.49368	lncRNA	Agilent_HUMAN_G3V2	TCONS_l2_00025618	chr7	5889573	5889632	+	NA	NA	NA	Unknown
CUST_33990_PI429285431	0.0427736	3.48971	lncRNA	NONCODERv3	>n340803|AK093082|mRNAlikelncRNA|Homosapiens|HumanlncRNA|JounralRNA|3266|NULL|-0.8228480|-0.2102158	chr6	2771261	2773366	-	WRNIP1	NA	chr6:2765666-2785979	inner
CUST_3013_PI429285431	0.0358299	3.48084	lncRNA	gencode_v17	>transcript_id "ENST00000602981.1" | genecode_v17	chr8	12270336	12271882	+	FAM86B2	NA	chr8:12278528-12281882	inter
CUST_42031_PI429285431	0.000738459	3.46488	lncRNA	ensembl.GRCh37.72	>ENST00000385267 ncrna:miRNA chromosome:GRCh37:19:52785050:52785146:1 gene:ENSG00000208002 gene_biotype:miRNA transcript_biotype:miRNA	chr19	52785050	52785146	+	ZNF766	NA	chr19:52775050-52795146	inner
CUST_23918_PI429285431	0.0372839	3.46439	lncRNA	lncipedia2.1	>lnc-ANKAR-1:3	chr2	190629581	190630147	+	OSGEPL1	hg19_refFlat_PKP2:range=chr12:32945358-330496655'pad=0,hg19_refFlat_PKP2:range=chr12:32945358-330496655'pad=0 3'pad=0 strand=- repeatMasking=none,-81.10;hg19_refFlat_DHPS:range=chr19:12786652-127919275'pad=0,hg19_refFlat_DHPS:range=chr19:12786652-127919275'pad=0 3'pad=0 strand=- repeatMasking=none,-73.70;hg19_refFlat_CYB561D1:range=chr1:110036762-1100388815'pad=0,hg19_refFlat_CYB561D1:range=chr1:…	NA	inter
LNCA_21_P0010406	0.0229438	3.44871	lncRNA	Agilent_HUMAN_G3V2	TCONS_00029558	chr22	27232762	27238290	+	NA	NA	NA	Unknown
CUST_35936_PI429285431	0.0225567	3.42494	lncRNA	NONCODERv3	>n344574|NULL|lincRNA|Homosapiens|HumanlincRNA|ScriptureReconstructionLincRNAsByLuo[unpublished]|linc_luo_122|NULL|-1.3180700|-0.2544638	chr17	43699270	43701679	+	CRHR1	hg19_refFlat_ADAMTS2:range=chr5:178578130-1787723295'pad=0,hg19_refFlat_ADAMTS2:range=chr5:178578130-1787723295'pad=0 3'pad=0 strand=- repeatMasking=none,-74.40;hg19_refFlat_ISY1:range=chr3:128848924-1288798185'pad=0,hg19_refFlat_ISY1:range=chr3:128848924-1288798185'pad=0 3'pad=0 strand=- repeatMasking=none,-78.80;hg19_refFlat_CAGE1:range=chr6:7329398-73874065'pad=0,hg19_refFlat_CAGE1:range=chr6:…	NA	inner
CUST_49181_PI429285431	0.037534	3.42332	lncRNA	UCSC	>hg19_lincRNAsTranscripts_TCONS_l2_00021325 range=chr4:142245756-142253762 5'pad=0 3'pad=0 strand=- repeatMasking=none	chr4	142245756	142246516	-	NA	hg19_refFlat_SLC2A14:range=chr12:7966912-80160515'pad=0,hg19_refFlat_SLC2A14:range=chr12:7966912-80160515'pad=0 3'pad=0 strand=- repeatMasking=none,-72.40;hg19_refFlat_LOC100505549:range=chr18:55309146-553354075'pad=0,hg19_refFlat_LOC100505549:range=chr18:55309146-553354075'pad=0 3'pad=0 strand=+ repeatMasking=none,-71.50	NA	inter
LNCA_21_P0010719	0.0123198	3.41913	lncRNA	Agilent_HUMAN_G3V2	ENST00000412492	chr1	143391802	143392068	+	NA	NA	NA	Unknown
CUST_52017_PI429285431	0.0433745	3.39557	lncRNA	UCSC	>hg19_lincRNAsTranscripts_TCONS_l2_00017139 range=chr21:15282788-15297607 5'pad=0 3'pad=0 strand=- repeatMasking=none	chr21	15282788	15283533	-	NA	NA	NA	inter
CUST_43328_PI429285431	0.0225624	3.39062	lncRNA	ensembl.GRCh37.72	>ENST00000454051 havana:non_coding chromosome:GRCh37:HSCHR6_MHC_QBL:29969382:29992343:-1 gene:ENSG00000235814 gene_biotype:non_coding transcript_biotype:non_coding	chrHSCHR6_MHC_QBL	29975382	29978381	-	NA	hg19_refFlat_PKP2:range=chr12:32945358-330496655'pad=0,hg19_refFlat_PKP2:range=chr12:32945358-330496655'pad=0 3'pad=0 strand=- repeatMasking=none,-79.50;hg19_refFlat_NARF:range=chr17:80416680-804460335'pad=0,hg19_refFlat_NARF:range=chr17:80416680-804460335'pad=0 3'pad=0 strand=+ repeatMasking=none,-67.50;hg19_refFlat_CYB561D1:range=chr1:110036762-1100383975'pad=0,hg19_refFlat_CYB561D1:range=chr1:…	NA	Unknown
CUST_51725_PI429285431	0.0418651	3.38901	lncRNA	UCSC	>hg19_lincRNAsTranscripts_TCONS_l2_00011785 range=chr18:14224236-14256204 5'pad=0 3'pad=0 strand=+ repeatMasking=none	chr18	14227236	14230235	+	LOC100652806	NA	chr18:14234721-14249475	inter
LNCA_33_P3279660	0.033057	3.3841	lncRNA	Agilent_HUMAN_G3V2	XR_132877	chrUn_gl000211	103518	103576	+	NA	NA	NA	Unknown
CUST_6335_PI429285431	0.00655457	3.37003	lncRNA	gencode_v17	>transcript_id "ENST00000415793.1" | genecode_v17	chr19	12305830	12306324	+	ZNF136	NA	chr19:12295830-12300064	inter
CUST_38168_PI429285431	0.0448883	3.36186	lncRNA	NONCODERv3	>n381420|NULL|lncRNA|Homosapiens||UCSCGeneNoncode|uc001ius.1||0.1817110|-0.3627136	chr10	29745064	29746227	+	SVIL	hg19_refFlat_ISY1:range=chr3:128848924-1288798185'pad=0,hg19_refFlat_ISY1:range=chr3:128848924-1288798185'pad=0 3'pad=0 strand=- repeatMasking=none,-84.60chr10:29746277-29756228	NA	inter
CUST_391_PI429201921	0.0373494	3.36177	lncRNA	Affy_HUMAN_HTA2.0	linc-C1orf93	chr1	2499253	2508846	+	NFIA	NA	chr1:61704666-61729182	Unknown
CUST_29459_PI429285431	0.00836767	3.35859	lncRNA	NONCODERv3	>n332866|AF085925|mRNAlikelncRNA|Homosapiens|NULL|H-invitationalv7.5|HIT000066804|http://h-invitational.jp/hinv/spsoup/transcript_view?hit_id=HIT000066804|-1.1818100|-0.3109920	chr13	28198330	28198870	+	LNX2	hg19_refFlat_INSL3:range=chr19:17927680-179323155'pad=0,hg19_refFlat_INSL3:range=chr19:17927680-179323155'pad=0 3'pad=0 strand=- repeatMasking=none,-70.00;hg19_refFlat_MICAL3:range=chr22:18317216-183895785'pad=0,hg19_refFlat_MICAL3:range=chr22:18317216-183895785'pad=0 3'pad=0 strand=- repeatMasking=none,-73.90;hg19_refFlat_MYL10:range=chr7:101256755-1012723985'pad=0,hg19_refFlat_MYL10:range=chr7:…	NA	inner
CUST_48730_PI429285431	0.0167976	3.35218	lncRNA	UCSC	>hg19_lincRNAsTranscripts_TCONS_l2_00014897 range=chr2:131174351-131199391 5'pad=0 3'pad=0 strand=- repeatMasking=none	chr2	131177351	131179363	-	LOC646802	hg19_refFlat_FAM122C:range=chrX:133941629-1339434035'pad=0,hg19_refFlat_FAM122C:range=chrX:133941629-1339434035'pad=0 3'pad=0 strand=+ repeatMasking=none,-76.40;hg19_refFlat_TCEANC:range=chrX:13677806-136816835'pad=0,hg19_refFlat_TCEANC:range=chrX:13677806-136816835'pad=0 3'pad=0 strand=+ repeatMasking=none,-77.70;hg19_refFlat_ECD:range=chr10:74894341-749236955'pad=0,hg19_refFlat_ECD:range=chr10:…	NA	inter
CUST_48725_PI429285431	0.0124752	3.35203	lncRNA	UCSC	>hg19_lincRNAsTranscripts_TCONS_l2_00014892 range=chr2:130783589-130793127 5'pad=0 3'pad=0 strand=- repeatMasking=none	chr2	130783589	130785895	-	NA	NA	NA	inter
CUST_31438_PI429285431	0.0358404	3.33448	lncRNA	NONCODERv3	>n337906|AK128017|mRNAlikelncRNA|Homosapiens|HumanlncRNA|JounralRNA|289|NULL|-0.0159731|-0.1993571	chr1	46048538	46050383	-	NASP	hg19_refFlat_ITCH:range=chr20:32981618-330955995'pad=0,hg19_refFlat_ITCH:range=chr20:32981618-330955995'pad=0 3'pad=0 strand=+ repeatMasking=none,-81.40;hg19_refFlat_FAM122C:range=chrX:133941629-1339434035'pad=0,hg19_refFlat_FAM122C:range=chrX:133941629-1339434035'pad=0 3'pad=0 strand=+ repeatMasking=none,-83.10;hg19_refFlat_REL:range=chr2:61108976-611496705'pad=0,hg19_refFlat_REL:range=chr2:6110…	NA	inner
LNCA_19_P00810227	0.0224423	3.33433	lncRNA	Agilent_HUMAN_G3V2	TCONS_00022559	chr14	76729786	76729845	+	NA	NA	NA	Unknown
LNCA_21_P0012663	0.0320563	3.33269	lncRNA	Agilent_HUMAN_G3V2	TCONS_l2_00021110	chr4	38607595	38607654	-	NA	NA	NA	Unknown
CUST_39012_PI429285431	0.046658	3.3325	lncRNA	NONCODERv3	>n385327|NULL|lncRNA|Homosapiens||UCSCGeneNoncode|uc003wpf.1||-0.4004960|-0.2325456	chr8	590407	593406	-	NA	hg19_refFlat_ZNF283:range=chr19:44337657-443527935'pad=0,hg19_refFlat_ZNF283:range=chr19:44337657-443527935'pad=0 3'pad=0 strand=+ repeatMasking=none,-93.60;hg19_refFlat_TMEM230:range=chr20:5081437-50936745'pad=0,hg19_refFlat_TMEM230:range=chr20:5081437-50936745'pad=0 3'pad=0 strand=- repeatMasking=none,-78.80;hg19_refFlat_CSF2RA:range=chrX:1401597-14283725'pad=0,hg19_refFlat_CSF2RA:range=chrX:14…	NA	inter
CUST_10043_PI429285431	0.0497548	3.33125	lncRNA	lncipedia2.1	>lnc-DR1-1:1	chr1	93800269	93803268	+	DR1	hg19_refFlat_ISY1:range=chr3:128848924-1288798185'pad=0,hg19_refFlat_ISY1:range=chr3:128848924-1288798185'pad=0 3'pad=0 strand=- repeatMasking=none,-86.60;hg19_refFlat_CAGE1:range=chr6:7329398-73874065'pad=0,hg19_refFlat_CAGE1:range=chr6:7329398-73874065'pad=0 3'pad=0 strand=- repeatMasking=none,-87.60;hg19_refFlat_C11orf80:range=chr11:66512214-666107055'pad=0,hg19_refFlat_C11orf80:range=chr11:66…	NA	inter
CUST_46496_PI429285431	0.0033683	3.32413	lncRNA	ncbi	>gi|223972678|ref|NR_026949.1| Homo sapiens long intergenic non-protein coding RNA 277 (LINC00277), non-coding RNA	Chr15	69373190	69375716	+	NA	NA	NA	inter
CUST_8329_PI429285431	0.0441264	3.32281	lncRNA	lncipedia2.1	>lnc-ZNF814-2:1	chr19	58368385	58370488	-	ZNF587	NA	chr19:58361181-58376491	inner
LNCA_21_P0007937	0.0298436	3.31867	lncRNA	Agilent_HUMAN_G3V2	ENST00000420693	chr13	45925426	45925485	+	NA	NA	NA	Unknown
CUST_31979_PI429285431	0.00831063	3.30403	lncRNA	NONCODERv3	>n338538|AK094916|mRNAlikelncRNA|Homosapiens|HumanlncRNA|JounralRNA|940|NULL|-1.1758900|-0.4320777	chr1	222900535	222901560	-	FAM177B	hg19_refFlat_ITCH:range=chr20:32981618-330955995'pad=0,hg19_refFlat_ITCH:range=chr20:32981618-330955995'pad=0 3'pad=0 strand=+ repeatMasking=none,-76.90;hg19_refFlat_RTBDN:range=chr19:12937421-129459125'pad=0,hg19_refFlat_RTBDN:range=chr19:12937421-129459125'pad=0 3'pad=0 strand=- repeatMasking=none,-68.70;hg19_refFlat_NEK4:range=chr3:52745793-528047625'pad=0,hg19_refFlat_NEK4:range=chr3:52745793…	NA	inner
CUST_9695_PI429285431	0.0275575	3.30315	lncRNA	lncipedia2.1	>lnc-RBMY1B-1:5	chrY	23314725	23314981	+	NA	NA	NA	inter
CUST_13387_PI429285431	0.0288926	3.30185	lncRNA	lncipedia2.1	>lnc-TRMT11-1:2	chr6	126398384	126400517	+	NA	hg19_refFlat_C8orf44:range=chr8:67589944-675921895'pad=0,hg19_refFlat_C8orf44:range=chr8:67589944-675921895'pad=0 3'pad=0 strand=+ repeatMasking=none,-71.50	NA	inter
CUST_45970_PI429285431	0.0154219	3.29491	lncRNA	ncbi	>gi|223468605|ref|NR_026788.1| Homo sapiens family with sequence similarity 66, member C (FAM66C), non-coding RNA	Chr12	8332805	8335804	+	NA	NA	NA	inter
LNCA_21_P0014729	0.00390343	3.29464	lncRNA	Agilent_HUMAN_G3V2	XR_113027	chr7	75122462	75122521	-	NA	NA	NA	Unknown
CUST_45642_PI429285431	0.0112732	3.29083	lncRNA	ncbi	>gi|226061013|ref|NR_027430.1| Homo sapiens uncharacterized LOC219347 (LOC219347), transcript variant 3, non-coding RNA	Chr10	81805989	81808988	-	NA	hg19_refFlat_ZNF410:range=chr14:74358879-743915065'pad=0,hg19_refFlat_ZNF410:range=chr14:74358879-743915065'pad=0 3'pad=0 strand=+ repeatMasking=none,-85.50;hg19_refFlat_ZNF573:range=chr19:38229393-382492365'pad=0,hg19_refFlat_ZNF573:range=chr19:38229393-382492365'pad=0 3'pad=0 strand=- repeatMasking=none,-80.30;hg19_refFlat_RPP30:range=chr10:92631744-926630195'pad=0,hg19_refFlat_RPP30:range=chr1…	NA	inter
CUST_51014_PI429285431	0.0427918	3.28391	lncRNA	UCSC	>hg19_lincRNAsTranscripts_TCONS_l2_00006951 range=chr13:81231053-81270425 5'pad=0 3'pad=0 strand=+ repeatMasking=none	chr13	81231053	81231464	+	NA	NA	NA	inter
CUST_20635_PI429285431	0.0013078	3.28109	lncRNA	lncipedia2.1	>lnc-RPRML-3:11	chr17	45098948	45099305	-	NA	NA	NA	inter
CUST_49103_PI429285431	0.0215242	3.2809	lncRNA	UCSC	>hg19_lincRNAsTranscripts_TCONS_l2_00021108 range=chr4:38603968-38608278 5'pad=0 3'pad=0 strand=- repeatMasking=none	chr4	38603968	38604548	-	NA	NA	NA	inter
CUST_44547_PI429285431	0.00359102	3.2792	lncRNA	ncbi	>gi|402478649|ref|NR_073104.1| Homo sapiens integrin, alpha 2 (CD49B, alpha 2 subunit of VLA-2 receptor) (ITGA2), transcript variant 3, non-coding RNA	Chr5	52288156	52291155	+	NA	hg19_refFlat_SLC30A6:range=chr2:32390970-324457825'pad=0,hg19_refFlat_SLC30A6:range=chr2:32390970-324457825'pad=0 3'pad=0 strand=+ repeatMasking=none,-43.60;hg19_refFlat_ITCH:range=chr20:32981618-330955995'pad=0,hg19_refFlat_ITCH:range=chr20:32981618-330955995'pad=0 3'pad=0 strand=+ repeatMasking=none,-83.00;hg19_refFlat_MLLT10:range=chr10:21823574-218456065'pad=0,hg19_refFlat_MLLT10:range=chr10:…	NA	inter
CUST_35207_PI429285431	0.0423753	3.27172	lncRNA	NONCODERv3	>n342191|AK097380|mRNAlikelncRNA|Homosapiens|HumanlncRNA|JounralRNA|4681|NULL|-0.8304900|-0.2940624	chr3	142849527	142851285	+	CHST2	NA	chr3:142839527-142841812	inter
CUST_8910_PI429285431	0.0336228	3.26977	lncRNA	lncipedia2.1	>lnc-FBN2-1:1	chr5	127339336	127339808	-	NA	NA	NA	inter
CUST_48677_PI429285431	0.024431	3.26058	lncRNA	UCSC	>hg19_lincRNAsTranscripts_TCONS_l2_00013847 range=chr2:98306741-98317817 5'pad=0 3'pad=0 strand=+ repeatMasking=none	chr2	98306741	98307102	+	NA	NA	NA	inter
CUST_33212_PI429285431	0.0107074	3.24516	lncRNA	NONCODERv3	>n339910|AK091108|mRNAlikelncRNA|Homosapiens|HumanlncRNA|JounralRNA|2359|NULL|-0.9980570|-0.3021593	chr18	66382549	66384399	+	CCDC102B	NA	chr18:66382491-66432236	inner
CUST_41977_PI429285431	0.0459689	3.24136	lncRNA	ensembl.GRCh37.72	>ENST00000362212 ncrna:miRNA chromosome:GRCh37:14:100575992:100576090:1 gene:ENSG00000199082 gene_biotype:miRNA transcript_biotype:miRNA	chr14	100575992	100576090	+	EVL	NA	chr14:100565992-100586090	inner
CUST_25624_PI429285431	0.0198373	3.23529	lncRNA	lncipedia2.1	>lnc-DCBLD2-1:3	chr3	98451270	98451793	-	ST3GAL6	NA	chr3:98451572-98461352	inter
CUST_39429_PI429285431	0.0116262	3.23066	lncRNA	NONCODERv3	>n386722|NULL|lncRNA|Homosapiens||UCSCGeneNoncode|uc010tcj.1||1.6736300|-0.3861843	chr13	19432542	19435541	-	NA	hg19_refFlat_ASMT:range=chrY:1684093-17119075'pad=0,hg19_refFlat_ASMT:range=chrY:1684093-17119075'pad=0 3'pad=0 strand=+ repeatMasking=none,-50.50;hg19_refFlat_BRD2:range=chr6_cox_hap2:4385214-43930395'pad=0,hg19_refFlat_BRD2:range=chr6_cox_hap2:4385214-43930395'pad=0 3'pad=0 strand=+ repeatMasking=none,-81.40;hg19_refFlat_TSFM:range=chr12:58176585-581903665'pad=0,hg19_refFlat_TSFM:range=chr12:58…	NA	inter
CUST_22804_PI429285431	0.0499074	3.21612	lncRNA	lncipedia2.1	>lnc-GGCT-1:19	chr7	30603339	30606338	-	NA	hg19_refFlat_RHBG:range=chr1:156339204-1563546375'pad=0,hg19_refFlat_RHBG:range=chr1:156339204-1563546375'pad=0 3'pad=0 strand=+ repeatMasking=none,-83.70;hg19_refFlat_ZNF410:range=chr14:74358879-743915065'pad=0,hg19_refFlat_ZNF410:range=chr14:74358879-743915065'pad=0 3'pad=0 strand=+ repeatMasking=none,-87.90;hg19_refFlat_OSTC:range=chr4:109571812-1095884135'pad=0,hg19_refFlat_OSTC:range=chr4:10…	NA	inter
CUST_1641_PI429285431	0.0326861	3.21369	lncRNA	gencode_v17	>transcript_id "ENST00000451228.1" | genecode_v17	chr3	195416246	195416849	+	MUC20	NA	chr3:195447753-195448746	inter
CUST_23267_PI429285431	0.0451456	3.21209	lncRNA	lncipedia2.1	>lnc-HADH-1:5	chr4	109097575	109097934	+	LEF1	hg19_refFlat_NANOGNB:range=chr12:7917882-79264475'pad=0,hg19_refFlat_NANOGNB:range=chr12:7917882-79264475'pad=0 3'pad=0 strand=+ repeatMasking=none,-90.90;hg19_refFlat_C8orf44:range=chr8:67589944-675921895'pad=0,hg19_refFlat_C8orf44:range=chr8:67589944-675921895'pad=0 3'pad=0 strand=+ repeatMasking=none,-85.80;hg19_refFlat_CYB561D1:range=chr1:110036762-1100384895'pad=0,hg19_refFlat_CYB561D1:range…	NA	inter
CUST_39511_PI429285431	0.0214699	3.2025	lncRNA	NONCODERv3	>n387296|NULL|lncRNA|Homosapiens||UCSCGeneNoncode|uc011bsy.1||-1.0658400|-0.1878029	chr3	195370804	195372308	-	NA	NA	NA	inter
CUST_26462_PI429285431	0.0369763	3.20109	lncRNA	lncipedia2.1	>lnc-IDS-1:12	chrX	148614417	148615034	-	CXorf40A	NA	chrX:148622519-148624476	inter
CUST_7429_PI429285431	0.0391557	3.19737	lncRNA	lncipedia2.1	>lnc-KIAA1147-2:6	chr7	141437998	141440259	-	WEE2	hg19_refFlat_WEE2:range=chr7:141408559-1414301205'pad=0,hg19_refFlat_WEE2:range=chr7:141408559-1414301205'pad=0 3'pad=0 strand=+ repeatMasking=none,-88.80chr7:141427998-141431071	NA	inter
CUST_33995_PI429285431	0.00153733	3.19682	lncRNA	NONCODERv3	>n340808|AK124847|mRNAlikelncRNA|Homosapiens|HumanlncRNA|JounralRNA|3271|NULL|-0.9638400|-0.3061534	chr17	65671273	65673530	-	PITPNC1	hg19_refFlat_PITPNC1:range=chr17:65374271-656886935'pad=0,hg19_refFlat_PITPNC1:range=chr17:65374271-656886935'pad=0 3'pad=0 strand=+ repeatMasking=none,-83.60;hg19_refFlat_PITPNC1:range=chr17:65374271-656890045'pad=0,hg19_refFlat_PITPNC1:range=chr17:65374271-656890045'pad=0 3'pad=0 strand=+ repeatMasking=none,-83.60chr17:65661273-65685672	NA	inner
CUST_39399_PI429285431	0.0230359	3.19488	lncRNA	NONCODERv3	>n386585|NULL|lncRNA|Homosapiens||UCSCGeneNoncode|uc010pbf.1||1.3938300|-0.2144233	chr1	149282475	149285474	+	NA	hg19_refFlat_BRD2:range=chr6_mann_hap4:4397903-44057165'pad=0,hg19_refFlat_BRD2:range=chr6_mann_hap4:4397903-44057165'pad=0 3'pad=0 strand=+ repeatMasking=none,-83.30;hg19_refFlat_OSTC:range=chr4:109571812-1095884135'pad=0,hg19_refFlat_OSTC:range=chr4:109571812-1095884135'pad=0 3'pad=0 strand=+ repeatMasking=none,-86.60;hg19_refFlat_TRIM5:range=chr11:5685318-57014075'pad=0,hg19_refFlat_TRIM5:rang…	NA	inter
CUST_39398_PI429285431	0.0393618	3.18369	lncRNA	NONCODERv3	>n386585|NULL|lncRNA|Homosapiens||UCSCGeneNoncode|uc010pbf.1||1.3938300|-0.2144233	chr1	149279475	149282474	+	NA	hg19_refFlat_BRD2:range=chr6_mann_hap4:4397903-44057165'pad=0,hg19_refFlat_BRD2:range=chr6_mann_hap4:4397903-44057165'pad=0 3'pad=0 strand=+ repeatMasking=none,-83.30;hg19_refFlat_OSTC:range=chr4:109571812-1095884135'pad=0,hg19_refFlat_OSTC:range=chr4:109571812-1095884135'pad=0 3'pad=0 strand=+ repeatMasking=none,-86.60;hg19_refFlat_TRIM5:range=chr11:5685318-57014075'pad=0,hg19_refFlat_TRIM5:rang…	NA	inter
CUST_21035_PI429285431	0.0314496	3.18347	lncRNA	lncipedia2.1	>lnc-CTSL2-4:1	chr9	99983312	99986311	-	NA	NA	NA	inter
CUST_33175_PI429285431	0.0140125	3.18322	lncRNA	NONCODERv3	>n339865|AF086240|mRNAlikelncRNA|Homosapiens|HumanlncRNA|JounralRNA|2313|NULL|-0.9374000|-0.4934361	chr18	44383186	44383863	-	PIAS2	NA	chr18:44392060-44393857	inter
CUST_52042_PI429285431	0.00374184	3.17815	lncRNA	UCSC	>hg19_lincRNAsTranscripts_TCONS_l2_00017191 range=chr21:29948898-29998990 5'pad=0 3'pad=0 strand=- repeatMasking=none	chr21	29948898	29949786	-	NA	hg19_refFlat_C15orf40:range=chr15:83659385-836803595'pad=0,hg19_refFlat_C15orf40:range=chr15:83659385-836803595'pad=0 3'pad=0 strand=- repeatMasking=none,-77.40;hg19_refFlat_ZMAT1:range=chrX:101138482-1011736065'pad=0,hg19_refFlat_ZMAT1:range=chrX:101138482-1011736065'pad=0 3'pad=0 strand=- repeatMasking=none,-87.50;hg19_refFlat_STAP2:range=chr19:4324130-43387505'pad=0,hg19_refFlat_STAP2:range=ch…	NA	inter
CUST_30689_PI429285431	0.0393164	3.17635	lncRNA	NONCODERv3	>n336179|X92781|mRNAlikelncRNA|Homosapiens|NULL|H-invitationalv7.5|HIT000324583|http://h-invitational.jp/hinv/spsoup/transcript_view?hit_id=HIT000324583|-0.8735990|-0.1278798	chr14	22237067	22237380	+	NA	NA	NA	inter
CUST_37755_PI429285431	0.0195547	3.17509	lncRNA	NONCODERv3	>n346262|NULL|lincRNA|Homosapiens|HumanlincRNA|ScriptureReconstructionLincRNAsByLuo[unpublished]|linc_luo_1812|NULL|-1.3274400|-0.2798292	chr6	6493143	6496078	-	LY86	NA	chr6:6534930-6597623	inter
CUST_36837_PI429285431	0.0288234	3.17421	lncRNA	NONCODERv3	>n345310|NULL|lincRNA|Homosapiens|HumanlincRNA|ScriptureReconstructionLincRNAsByLuo[unpublished]|linc_luo_859|NULL|-1.3674000|-0.3383335	chr15	72628858	72630535	-	HEXA	hg19_refFlat_TTC22:range=chr1:55251219-552668365'pad=0,hg19_refFlat_TTC22:range=chr1:55251219-552668365'pad=0 3'pad=0 strand=- repeatMasking=none,-72.40;hg19_refFlat_GYG2:range=chrX:2748230-27992545'pad=0,hg19_refFlat_GYG2:range=chrX:2748230-27992545'pad=0 3'pad=0 strand=+ repeatMasking=none,-30.20;hg19_refFlat_DISC1:range=chr1:231762614-2321725775'pad=0,hg19_refFlat_DISC1:range=chr1:231762614-23…	NA	inter
CUST_38178_PI429285431	0.0149952	3.17192	lncRNA	NONCODERv3	>n381438|NULL|lncRNA|Homosapiens||UCSCGeneNoncode|uc001jbl.2||-0.8362110|-0.1635249	chr10	45322732	45324530	-	RASSF4	NA	chr10:45455219-45465137	inter
CUST_40794_PI429285431	0.0303594	3.17076	lncRNA	NONCODERv3	>n410553|NR_037771|lncRNA|Homosapiens||RefGeneNoncode|NR_037771||11.3096000|-0.3242510	chr10	121655084	121658083	+	SEC23IP	hg19_refFlat_FAM122C:range=chrX:133941629-1339434035'pad=0,hg19_refFlat_FAM122C:range=chrX:133941629-1339434035'pad=0 3'pad=0 strand=+ repeatMasking=none,-78.30;hg19_refFlat_FAM115C:range=chr7:143412963-1434247605'pad=0,hg19_refFlat_FAM115C:range=chr7:143412963-1434247605'pad=0 3'pad=0 strand=+ repeatMasking=none,-77.70;hg19_refFlat_ZNF573:range=chr19:38229393-382492365'pad=0,hg19_refFlat_ZNF573:…	NA	inter
CUST_31783_PI429285431	0.0149309	3.169	lncRNA	NONCODERv3	>n338325|AL833129|mRNAlikelncRNA|Homosapiens|HumanlncRNA|JounralRNA|719|NULL|-1.2066200|-0.3348852	chr14	60606870	60609869	+	C14orf135	hg19_refFlat_TCEANC:range=chrX:13677806-136816835'pad=0,hg19_refFlat_TCEANC:range=chrX:13677806-136816835'pad=0 3'pad=0 strand=+ repeatMasking=none,-78.10;hg19_refFlat_ZNF700:range=chr19:12037391-120610685'pad=0,hg19_refFlat_ZNF700:range=chr19:12037391-120610685'pad=0 3'pad=0 strand=+ repeatMasking=none,-86.40;hg19_refFlat_MRPL10:range=chr17:45901571-459065865'pad=0,hg19_refFlat_MRPL10:range=chr1…	NA	inter
LNCA_19_P00319698	0.02063	3.16429	lncRNA	Agilent_HUMAN_G3V2	XR_109474	chr18	34812018	34812077	+	NA	NA	NA	Unknown
CUST_25129_PI429285431	0.0220379	3.15985	lncRNA	lncipedia2.1	>lnc-KAT7-1:1	chr17	47913716	47914131	+	TAC4	hg19_refFlat_SEPP1:range=chr5:42800822-428108695'pad=0,hg19_refFlat_SEPP1:range=chr5:42800822-428108695'pad=0 3'pad=0 strand=- repeatMasking=none,-78.50;hg19_refFlat_NANOGNB:range=chr12:7917882-79264475'pad=0,hg19_refFlat_NANOGNB:range=chr12:7917882-79264475'pad=0 3'pad=0 strand=+ repeatMasking=none,-85.60;hg19_refFlat_OR1J1:range=chr9:125239237-1252402055'pad=0,hg19_refFlat_OR1J1:range=chr9:1252…	NA	inter
CUST_51991_PI429285431	0.0307654	3.15935	lncRNA	UCSC	>hg19_lincRNAsTranscripts_TCONS_l2_00017188 range=chr21:29815123-29949706 5'pad=0 3'pad=0 strand=- repeatMasking=none	chr21	29815123	29817479	-	NA	NA	NA	inter
CUST_40108_PI429285431	0.028514	3.15896	lncRNA	NONCODERv3	>n407543|NR_027000|lncRNA|Homosapiens||RefGeneNoncode|NR_027000||1.3557400|-0.2269590	chr8	7118140	7121013	-	FAM90A15	NA	chr8:7108140-7117436	inter
LNCA_21_P0003157	0.0335488	3.14719	lncRNA	Agilent_HUMAN_G3V2	TCONS_00006602	chr3	107757338	107757397	-	NA	NA	NA	Unknown
CUST_34036_PI429285431	0.00787661	3.14371	lncRNA	NONCODERv3	>n340853|CR590738|mRNAlikelncRNA|Homosapiens|HumanlncRNA|JounralRNA|3317|NULL|0.0759121|-0.1642940	chr17	73556194	73556849	+	LLGL2	hg19_refFlat_CYB561D1:range=chr1:110036762-1100383975'pad=0,hg19_refFlat_CYB561D1:range=chr1:110036762-1100383975'pad=0 3'pad=0 strand=+ repeatMasking=none,-73.50;hg19_refFlat_ISY1:range=chr3:128848924-1288798185'pad=0,hg19_refFlat_ISY1:range=chr3:128848924-1288798185'pad=0 3'pad=0 strand=- repeatMasking=none,-89.20;hg19_refFlat_ZNF429:range=chr19:21688574-217208805'pad=0,hg19_refFlat_ZNF429:rang…	NA	inner
CUST_50103_PI429285431	0.0393495	3.14139	lncRNA	UCSC	>hg19_lincRNAsTranscripts_TCONS_l2_00028605 range=chr9:3663780-3694788 5'pad=0 3'pad=0 strand=+ repeatMasking=none	chr9	3666780	3669779	+	NA	hg19_refFlat_ZNF429:range=chr19:21688574-217208805'pad=0,hg19_refFlat_ZNF429:range=chr19:21688574-217208805'pad=0 3'pad=0 strand=+ repeatMasking=none,-83.50;hg19_refFlat_BIRC5:range=chr17:76210398-762196355'pad=0,hg19_refFlat_BIRC5:range=chr17:76210398-762196355'pad=0 3'pad=0 strand=+ repeatMasking=none,-79.60;hg19_refFlat_ZNF195:range=chr11:3380348-33948215'pad=0,hg19_refFlat_ZNF195:range=chr11:…	NA	inter
CUST_34385_PI429285431	0.0217183	3.13236	lncRNA	NONCODERv3	>n341256|BC017910|mRNAlikelncRNA|Homosapiens|HumanlncRNA|JounralRNA|3724|NULL|-0.9730680|-0.1226744	chr7	66800962	66801477	+	NA	NA	NA	inter
CUST_33463_PI429285431	0.0491959	3.13192	lncRNA	NONCODERv3	>n340198|BC020624|mRNAlikelncRNA|Homosapiens|HumanlncRNA|JounralRNA|2659|NULL|-0.7773790|-0.2488603	chr4	109088680	109089754	+	LEF1	hg19_refFlat_LEF1:range=chr4:108984785-1090889235'pad=0,hg19_refFlat_LEF1:range=chr4:108984785-1090889235'pad=0 3'pad=0 strand=- repeatMasking=none,-104.30;hg19_refFlat_LEF1:range=chr4:108969828-1090889235'pad=0,hg19_refFlat_LEF1:range=chr4:108969828-1090889235'pad=0 3'pad=0 strand=- repeatMasking=none,-104.30chr4:109078680-109090112	NA	inner
LNCA_21_P0014277	0.016798	3.12523	lncRNA	Agilent_HUMAN_G3V2	ENST00000553105	chr12	29433385	29433444	-	NA	NA	NA	Unknown
CUST_32951_PI429285431	0.0319124	3.12513	lncRNA	NONCODERv3	>n339626|CR610740|mRNAlikelncRNA|Homosapiens|HumanlncRNA|JounralRNA|2070|NULL|-0.7265450|-0.1528869	chr20	31097809	31099665	+	LOC100506597	hg19_refFlat_PPIP5K1:range=chr15:43826872-438767025'pad=0,hg19_refFlat_PPIP5K1:range=chr15:43826872-438767025'pad=0 3'pad=0 strand=- repeatMasking=none,-48.70;hg19_refFlat_MYL10:range=chr7:101256755-1012723985'pad=0,hg19_refFlat_MYL10:range=chr7:101256755-1012723985'pad=0 3'pad=0 strand=- repeatMasking=none,-73.60;hg19_refFlat_GDPD2:range=chrX:69644835-696529365'pad=0,hg19_refFlat_GDPD2:range=chr…	NA	inner
CUST_41070_PI429285431	0.0482978	3.12408	lncRNA	ensembl.GRCh37.72	>ENST00000580915 ncrna:miRNA chromosome:GRCh37:2:112078589:112078668:-1 gene:ENSG00000266139 gene_biotype:miRNA transcript_biotype:miRNA	chr2	112078589	112078668	-	NA	NA	NA	inter
CUST_36115_PI429285431	0.0499632	3.11931	lncRNA	NONCODERv3	>n344692|NULL|lincRNA|Homosapiens|HumanlincRNA|ScriptureReconstructionLincRNAsByLuo[unpublished]|linc_luo_241|NULL|-1.3687700|-0.1856229	chr15	52222725	52222963	-	LEO1	NA	chr15:52216237-52238374	inter
CUST_41500_PI429285431	0.0479384	3.1132	lncRNA	ensembl.GRCh37.72	>ENST00000583305 ncrna:miRNA chromosome:GRCh37:2:169439453:169439528:1 gene:ENSG00000265694 gene_biotype:miRNA transcript_biotype:miRNA	chr2	169439453	169439528	+	CERS6	NA	chr2:169429453-169449528	inner
CUST_401_PI429285431	0.0238238	3.10661	lncRNA	gencode_v17	>transcript_id "ENST00000444754.1" | genecode_v17	chr1	143361708	143362483	+	NA	NA	NA	inter
CUST_43961_PI429285431	0.0156823	3.10286	lncRNA	ncbi	>gi|374532827|ref|NR_046260.1| Homo sapiens uncharacterized LOC100216479 (LOC100216479), transcript variant 3, non-coding RNA	Chr2	131174323	131176967	-	NA	hg19_refFlat_BTG3:range=chr21:18966411-189814625'pad=0,hg19_refFlat_BTG3:range=chr21:18966411-189814625'pad=0 3'pad=0 strand=- repeatMasking=none,-83.90;hg19_refFlat_ZNF493:range=chr19:21580040-215903305'pad=0,hg19_refFlat_ZNF493:range=chr19:21580040-215903305'pad=0 3'pad=0 strand=+ repeatMasking=none,-73.70;hg19_refFlat_ZNF283:range=chr19:44337657-443527935'pad=0,hg19_refFlat_ZNF283:range=chr19:…	NA	inter
CUST_6574_PI429285431	0.041516	3.09583	lncRNA	gencode_v17	>transcript_id "ENST00000596766.1" | genecode_v17	chr19	53638190	53638575	-	ZNF347	NA	chr19:53641957-53648575	inter
CUST_21546_PI429285431	0.0379169	3.09548	lncRNA	lncipedia2.1	>lnc-BCL7C-1:1	chr16	30906245	30906805	-	BCL7C	NA	chr16:30899116-30905399	inter
CUST_49177_PI429285431	0.0346007	3.09067	lncRNA	UCSC	>hg19_lincRNAsTranscripts_TCONS_l2_00021321 range=chr4:142237870-142254310 5'pad=0 3'pad=0 strand=- repeatMasking=none	chr4	142237870	142239534	-	NA	hg19_refFlat_LOC100505549:range=chr18:55309146-553354075'pad=0,hg19_refFlat_LOC100505549:range=chr18:55309146-553354075'pad=0 3'pad=0 strand=+ repeatMasking=none,-71.50;hg19_refFlat_SLC2A14:range=chr12:7966912-80160515'pad=0,hg19_refFlat_SLC2A14:range=chr12:7966912-80160515'pad=0 3'pad=0 strand=- repeatMasking=none,-72.40	NA	inter
CUST_29810_PI429285431	0.0317873	3.08964	lncRNA	NONCODERv3	>n333525|BC039537|mRNAlikelncRNA|Homosapiens|NULL|H-invitationalv7.5|HIT000095799|http://h-invitational.jp/hinv/spsoup/transcript_view?hit_id=HIT000095799|-1.3027700|-0.3921027	chr8	54955498	54955913	-	LYPLA1	hg19_refFlat_NXNL2:range=chr9:91150350-911861075'pad=0,hg19_refFlat_NXNL2:range=chr9:91150350-911861075'pad=0 3'pad=0 strand=+ repeatMasking=none,-82.30;hg19_refFlat_NEK2:range=chr1:211831999-2118488215'pad=0,hg19_refFlat_NEK2:range=chr1:211831999-2118488215'pad=0 3'pad=0 strand=- repeatMasking=none,-78.00chr8:54958938-54967513	NA	inter
CUST_958_PI429285431	0.0321316	3.08725	lncRNA	gencode_v17	>transcript_id "ENST00000492960.2" | genecode_v17	chr2	98084083	98084645	-	NA	NA	NA	inter
CUST_46024_PI429285431	0.0389601	3.08453	lncRNA	ncbi	>gi|219521844|ref|NR_026544.1| Homo sapiens PCED1B antisense RNA 1 (PCED1B-AS1), non-coding RNA	Chr12	47602203	47604704	-	NA	hg19_refFlat_FAM193A:range=chr4:2632732-27217615'pad=0,hg19_refFlat_FAM193A:range=chr4:2632732-27217615'pad=0 3'pad=0 strand=+ repeatMasking=none,-70.70;hg19_refFlat_FAM76A:range=chr1:28052592-280870925'pad=0,hg19_refFlat_FAM76A:range=chr1:28052592-280870925'pad=0 3'pad=0 strand=+ repeatMasking=none,-34.10;hg19_refFlat_PODXL:range=chr7:131189070-1312411185'pad=0,hg19_refFlat_PODXL:range=chr7:1311…	NA	inter
CUST_38860_PI429285431	0.0336721	3.08309	lncRNA	NONCODERv3	>n384727|NULL|lncRNA|Homosapiens||UCSCGeneNoncode|uc003kug.1||1.0720500|-0.2862092	chr5	126381050	126384026	-	C5orf63	NA	chr5:126378250-126409184	inner
CUST_48244_PI429285431	0.0134298	3.07836	lncRNA	UCSC	>hg19_lincRNAsTranscripts_TCONS_l2_00001905 range=chr1:246934661-246945218 5'pad=0 3'pad=0 strand=- repeatMasking=none	chr1	246934661	246936745	-	LOC100130097	hg19_refFlat_CYB561D1:range=chr1:110036762-1100383975'pad=0,hg19_refFlat_CYB561D1:range=chr1:110036762-1100383975'pad=0 3'pad=0 strand=+ repeatMasking=none,-72.50;hg19_refFlat_ISY1:range=chr3:128848924-1288798185'pad=0,hg19_refFlat_ISY1:range=chr3:128848924-1288798185'pad=0 3'pad=0 strand=- repeatMasking=none,-83.30;hg19_refFlat_YIF1B:range=chr19:38796129-388065575'pad=0,hg19_refFlat_YIF1B:range=…	NA	inter
CUST_32228_PI429285431	0.0125865	3.06713	lncRNA	NONCODERv3	>n338801|CR592946|mRNAlikelncRNA|Homosapiens|HumanlncRNA|JounralRNA|1224|NULL|-0.4030890|-0.3673712	chr2	42583030	42584365	-	COX7A2L	hg19_refFlat_NUDT7:range=chr16:77756480-777755495'pad=0,hg19_refFlat_NUDT7:range=chr16:77756480-777755495'pad=0 3'pad=0 strand=+ repeatMasking=none,-73.60;hg19_refFlat_ZNF700:range=chr19:12037391-120610685'pad=0,hg19_refFlat_ZNF700:range=chr19:12037391-120610685'pad=0 3'pad=0 strand=+ repeatMasking=none,-84.50;hg19_refFlat_RQCD1:range=chr2:219433678-2194589995'pad=0,hg19_refFlat_RQCD1:range=chr2:…	NA	inner
LNCA_21_P0002691	0.0354758	3.06438	lncRNA	Agilent_HUMAN_G3V2	TCONS_00004565	chr2	208051032	208051091	-	NA	NA	NA	Unknown
CUST_44641_PI429285431	0.0208347	3.06268	lncRNA	ncbi	>gi|410170497|ref|XR_171089.1| PREDICTED: Homo sapiens uncharacterized LOC101060059 (LOC101060059), misc_RNA	NA	NA	NA	NA	NA	hg19_refFlat_PODXL:range=chr7:131189070-1312411185'pad=0,hg19_refFlat_PODXL:range=chr7:131189070-1312411185'pad=0 3'pad=0 strand=- repeatMasking=none,-82.80;hg19_refFlat_RQCD1:range=chr2:219433678-2194589995'pad=0,hg19_refFlat_RQCD1:range=chr2:219433678-2194589995'pad=0 3'pad=0 strand=+ repeatMasking=none,-32.70;hg19_refFlat_SUGT1:range=chr13:53227056-532619705'pad=0,hg19_refFlat_SUGT1:range=chr1…	NA	Unknown
CUST_17514_PI429285431	0.0109848	3.05899	lncRNA	lncipedia2.1	>lnc-DHRS7B-1:3	chr17	21133086	21133503	+	C17orf103	hg19_refFlat_DISC1:range=chr1:231762614-2319907715'pad=0,hg19_refFlat_DISC1:range=chr1:231762614-2319907715'pad=0 3'pad=0 strand=+ repeatMasking=none,-76.50;hg19_refFlat_IFT20:range=chr17:26655748-266590115'pad=0,hg19_refFlat_IFT20:range=chr17:26655748-266590115'pad=0 3'pad=0 strand=- repeatMasking=none,-31.90;hg19_refFlat_C11orf80:range=chr11:66512214-666107055'pad=0,hg19_refFlat_C11orf80:range=…	NA	inter
CUST_6762_PI429285431	0.0440154	3.05623	lncRNA	gencode_v17	>transcript_id "ENST00000449602.1" | genecode_v17	chr21	16742841	16743840	-	LOC100652984	NA	chr21:16742841-16767376	inter
CUST_48007_PI429285431	0.0284514	3.05572	lncRNA	ncbi	>gi|410173273|ref|XR_172185.1| PREDICTED: Homo sapiens uncharacterized LOC642533 (LOC642533), misc_RNA	NA	NA	NA	NA	NA	hg19_refFlat_STAP2:range=chr19:4324130-43387505'pad=0,hg19_refFlat_STAP2:range=chr19:4324130-43387505'pad=0 3'pad=0 strand=- repeatMasking=none,-85.20;hg19_refFlat_BRD2:range=chr6_qbl_hap6:4172820-41806325'pad=0,hg19_refFlat_BRD2:range=chr6_qbl_hap6:4172820-41806325'pad=0 3'pad=0 strand=+ repeatMasking=none,-81.00;hg19_refFlat_CREM:range=chr10:35456654-354682575'pad=0,hg19_refFlat_CREM:range=chr1…	NA	Unknown
CUST_8741_PI429285431	0.0224348	3.05283	lncRNA	lncipedia2.1	>lnc-CRYBA4-1:38	chr22	27114103	27114694	+	NA	NA	NA	inter
CUST_40938_PI429285431	0.0173703	3.03865	lncRNA	NONCODERv3	>n410891|NR_038353|lncRNA|Homosapiens||RefGeneNoncode|NR_038353||2.1549100|-0.1334350	chr5	177433966	177435042	+	NA	hg19_refFlat_SLC3A2:range=chr11:62623742-626561655'pad=0,hg19_refFlat_SLC3A2:range=chr11:62623742-626561655'pad=0 3'pad=0 strand=+ repeatMasking=none,-78.90;hg19_refFlat_BRD2:range=chr6_qbl_hap6:4172820-41806325'pad=0,hg19_refFlat_BRD2:range=chr6_qbl_hap6:4172820-41806325'pad=0 3'pad=0 strand=+ repeatMasking=none,-80.50;hg19_refFlat_DISC1:range=chr1:231762614-2319907715'pad=0,hg19_refFlat_DISC1:r…	NA	inter
CUST_38977_PI429285431	0.033308	3.03506	lncRNA	NONCODERv3	>n385205|NULL|lncRNA|Homosapiens||UCSCGeneNoncode|uc003tvp.2||-1.2284900|-0.2127009	chr7	66742734	66743113	-	NA	NA	NA	inter
LNCA_19_P00811430	0.0445067	3.03446	lncRNA	Agilent_HUMAN_G3V2	TCONS_00023880	chr15	25259816	25259875	+	NA	NA	NA	Unknown
CUST_22319_PI429285431	0.0348875	3.03296	lncRNA	lncipedia2.1	>lnc-IDS-1:9	chrX	148614417	148614835	-	CXorf40A	NA	chrX:148622519-148624620	inter
CUST_33771_PI429285431	0.0246649	3.03031	lncRNA	NONCODERv3	>n340553|AF090944|mRNAlikelncRNA|Homosapiens|HumanlncRNA|JounralRNA|3015|NULL|0.3304490|-0.3136857	chr5	94871014	94872175	+	TTC37	hg19_refFlat_TSFM:range=chr12:58176585-581903665'pad=0,hg19_refFlat_TSFM:range=chr12:58176585-581903665'pad=0 3'pad=0 strand=+ repeatMasking=none,-42.60;hg19_refFlat_CYB561D1:range=chr1:110036762-1100388815'pad=0,hg19_refFlat_CYB561D1:range=chr1:110036762-1100388815'pad=0 3'pad=0 strand=+ repeatMasking=none,-81.10;hg19_refFlat_PKP2:range=chr12:32945358-330496655'pad=0,hg19_refFlat_PKP2:range=chr1…	NA	inner
CUST_49403_PI429285431	0.0133838	3.02684	lncRNA	UCSC	>hg19_lincRNAsTranscripts_TCONS_l2_00022646 range=chr5:175547653-175548760 5'pad=0 3'pad=0 strand=+ repeatMasking=none	chr5	175547653	175547996	+	FAM153B	NA	chr5:175537653-175543458	inter
CUST_36828_PI429285431	0.0167207	3.01929	lncRNA	NONCODERv3	>n345304|NULL|lincRNA|Homosapiens|HumanlincRNA|ScriptureReconstructionLincRNAsByLuo[unpublished]|linc_luo_853|NULL|-1.3761500|-0.3435426	chr15	50648294	50651293	+	GABPB1	hg19_refFlat_HSD11B1L:range=chr19:5684044-56879565'pad=0,hg19_refFlat_HSD11B1L:range=chr19:5684044-56879565'pad=0 3'pad=0 strand=+ repeatMasking=none,-80.80;hg19_refFlat_ZNF573:range=chr19:38229393-382492365'pad=0,hg19_refFlat_ZNF573:range=chr19:38229393-382492365'pad=0 3'pad=0 strand=- repeatMasking=none,-79.60;hg19_refFlat_PRR16:range=chr5:119816899-1200224045'pad=0,hg19_refFlat_PRR16:range=chr…	NA	inter
CUST_43963_PI429285431	0.0256696	3.01398	lncRNA	ncbi	>gi|374532825|ref|NR_046258.1| Homo sapiens uncharacterized LOC100216479 (LOC100216479), transcript variant 1, non-coding RNA	Chr2	131174323	131177190	-	NA	hg19_refFlat_FAM76A:range=chr1:28052592-280870925'pad=0,hg19_refFlat_FAM76A:range=chr1:28052592-280870925'pad=0 3'pad=0 strand=+ repeatMasking=none,-42.20;hg19_refFlat_RQCD1:range=chr2:219433678-2194589995'pad=0,hg19_refFlat_RQCD1:range=chr2:219433678-2194589995'pad=0 3'pad=0 strand=+ repeatMasking=none,-52.50;hg19_refFlat_SUGT1:range=chr13:53227056-532619705'pad=0,hg19_refFlat_SUGT1:range=chr13:…	NA	inter
CUST_7856_PI429285431	0.0085552	3.01306	lncRNA	lncipedia2.1	>lnc-RAB15-1:1	chr14	65518601	65520668	-	CHURC1-FNTB	hg19_refFlat_ZMAT1:range=chrX:101138482-1011736065'pad=0,hg19_refFlat_ZMAT1:range=chrX:101138482-1011736065'pad=0 3'pad=0 strand=- repeatMasking=none,-72.70;hg19_refFlat_TCEANC:range=chrX:13677806-136816835'pad=0,hg19_refFlat_TCEANC:range=chrX:13677806-136816835'pad=0 3'pad=0 strand=+ repeatMasking=none,-77.70;hg19_refFlat_ECD:range=chr10:74894341-749236955'pad=0,hg19_refFlat_ECD:range=chr10:7489…	NA	inner
CUST_48724_PI429285431	0.0113153	3.01191	lncRNA	UCSC	>hg19_lincRNAsTranscripts_TCONS_l2_00014893 range=chr2:130783589-130806521 5'pad=0 3'pad=0 strand=- repeatMasking=none	chr2	130786589	130786764	-	NA	NA	NA	inter
CUST_5505_PI429285431	0.0188841	3.00594	lncRNA	gencode_v17	>transcript_id "ENST00000568752.1" | genecode_v17	chr16	33347309	33348279	-	NA	hg19_refFlat_GDPD2:range=chrX:69644835-696529365'pad=0,hg19_refFlat_GDPD2:range=chrX:69644835-696529365'pad=0 3'pad=0 strand=+ repeatMasking=none,-73.10;hg19_refFlat_AMBRA1:range=chr11:46419000-465699305'pad=0,hg19_refFlat_AMBRA1:range=chr11:46419000-465699305'pad=0 3'pad=0 strand=- repeatMasking=none,-49.50;hg19_refFlat_NOS3:range=chr7:150690892-1507004915'pad=0,hg19_refFlat_NOS3:range=chr7:1506…	NA	inter
CUST_40454_PI429285431	0.0254493	3.00561	lncRNA	NONCODERv3	>n409362|NR_033732|lncRNA|Homosapiens||RefGeneNoncode|NR_033732||5.9160100|-0.2703522	chrY	21620316	21620983	-	NA	hg19_refFlat_ISY1:range=chr3:128848924-1288798185'pad=0,hg19_refFlat_ISY1:range=chr3:128848924-1288798185'pad=0 3'pad=0 strand=- repeatMasking=none,-79.90;hg19_refFlat_ZNF429:range=chr19:21688574-217208805'pad=0,hg19_refFlat_ZNF429:range=chr19:21688574-217208805'pad=0 3'pad=0 strand=+ repeatMasking=none,-78.70	NA	inter
CUST_1631_PI429285431	0.00636192	2.99573	lncRNA	gencode_v17	>transcript_id "ENST00000451982.2" | genecode_v17	chr3	195408150	195408942	+	NA	NA	NA	inter
CUST_36132_PI429285431	0.0204461	2.99314	lncRNA	NONCODERv3	>n344705|NULL|lincRNA|Homosapiens|HumanlincRNA|ScriptureReconstructionLincRNAsByLuo[unpublished]|linc_luo_254|NULL|-1.6325400|-0.2153417	chr7	65172700	65174911	-	NA	NA	NA	inter
CUST_39208_PI429285431	0.0257659	2.99194	lncRNA	NONCODERv3	>n385994|NULL|lncRNA|Homosapiens||UCSCGeneNoncode|uc009xtc.2||1.0482800|-0.1215744	chr10	88965544	88966963	-	FAM22A	hg19_refFlat_NANOGNB:range=chr12:7917882-79264475'pad=0,hg19_refFlat_NANOGNB:range=chr12:7917882-79264475'pad=0 3'pad=0 strand=+ repeatMasking=none,-85.20;hg19_refFlat_FBLIM1:range=chr1:16091479-161015265'pad=0,hg19_refFlat_FBLIM1:range=chr1:16091479-161015265'pad=0 3'pad=0 strand=+ repeatMasking=none,-84.90;hg19_refFlat_TSFM:range=chr12:58176585-581903665'pad=0,hg19_refFlat_TSFM:range=chr12:5817…	NA	inter
CUST_16152_PI429285431	0.0346578	2.99191	lncRNA	lncipedia2.1	>lnc-RASA1-3:13	chr5	87581561	87582286	+	NA	NA	NA	inter
CUST_37315_PI429285431	0.0341653	2.99154	lncRNA	NONCODERv3	>n345759|NULL|lincRNA|Homosapiens|HumanlincRNA|ScriptureReconstructionLincRNAsByLuo[unpublished]|linc_luo_1308|NULL|-1.3153000|-0.3505023	chr18	14183698	14184555	+	NA	NA	NA	inter
CUST_23673_PI429285431	0.0209482	2.98706	lncRNA	lncipedia2.1	>lnc-ZNF609-2:1	chr15	64988821	64989060	+	OAZ2	NA	chr15:64979773-64995462	inner
CUST_40197_PI429285431	0.00070523	2.98638	lncRNA	NONCODERv3	>n408017|NR_027776|lncRNA|Homosapiens||RefGeneNoncode|NR_027776||2.6847500|-0.2300220	chr7	74306893	74308112	+	STAG3L2	NA	chr7:74299267-74306731	inter
CUST_5468_PI429285431	0.0264552	2.98162	lncRNA	gencode_v17	>transcript_id "ENST00000569920.1" | genecode_v17	chr16	25114649	25115122	-	LCMT1	NA	chr16:25123047-25132876	inter
CUST_20899_PI429285431	0.0442382	2.97927	lncRNA	lncipedia2.1	>lnc-ANKRD20A2-1:1	chr9	42473936	42475726	+	CBWD7	NA	chr9:42478004-42484269	inter
LNCA_21_P0012664	0.0294001	2.97594	lncRNA	Agilent_HUMAN_G3V2	THC2759281	NA	NA	NA	+	NA	NA	NA	Unknown
CUST_32781_PI429285431	0.032062	2.97506	lncRNA	NONCODERv3	>n339420|AF143877|mRNAlikelncRNA|Homosapiens|HumanlncRNA|JounralRNA|1852|NULL|-0.8954120|-0.2805924	chr3	111466664	111467698	+	PHLDB2	hg19_refFlat_ZNF283:range=chr19:44337657-443527935'pad=0,hg19_refFlat_ZNF283:range=chr19:44337657-443527935'pad=0 3'pad=0 strand=+ repeatMasking=none,-85.90;hg19_refFlat_BCL2L11:range=chr2:111881323-1118878125'pad=0,hg19_refFlat_BCL2L11:range=chr2:111881323-1118878125'pad=0 3'pad=0 strand=+ repeatMasking=none,-75.30chr3:111456664-111479996	NA	inner
CUST_44064_PI429285431	0.0488739	2.97045	lncRNA	ncbi	>gi|386869267|ref|NR_048551.1| Homo sapiens solute carrier family 4, anion exchanger, member 3 (SLC4A3), transcript variant 3, non-coding RNA	NA	NA	NA	NA	NA	NA	NA	Unknown
CUST_38474_PI429285431	0.00944651	2.96679	lncRNA	NONCODERv3	>n382958|NULL|lncRNA|Homosapiens||UCSCGeneNoncode|uc002dth.2||3.3886900|-0.3512489	chr16	29538925	29541240	-	NA	hg19_refFlat_TUBGCP2:range=chr10:135093270-1351164455'pad=0,hg19_refFlat_TUBGCP2:range=chr10:135093270-1351164455'pad=0 3'pad=0 strand=- repeatMasking=none,-82.40;hg19_refFlat_GDPD2:range=chrX:69644835-696529365'pad=0,hg19_refFlat_GDPD2:range=chrX:69644835-696529365'pad=0 3'pad=0 strand=+ repeatMasking=none,-82.80;hg19_refFlat_ZNF493:range=chr19:21580040-215903305'pad=0,hg19_refFlat_ZNF493:range=…	NA	inter
CUST_48407_PI429285431	0.0137441	2.96021	lncRNA	UCSC	>hg19_lincRNAsTranscripts_TCONS_l2_00001495 range=chr1:143194311-143195990 5'pad=0 3'pad=0 strand=- repeatMasking=none	chr1	143194311	143194653	-	NA	NA	NA	inter
CUST_46461_PI429285431	0.0124045	2.95315	lncRNA	ncbi	>gi|67191181|ref|NR_002318.2| Homo sapiens cation channel, sperm associated 2 pseudogene 1 (CATSPER2P1), non-coding RNA	Chr15	44028132	44029780	-	NA	hg19_refFlat_MYL10:range=chr7:101256755-1012723985'pad=0,hg19_refFlat_MYL10:range=chr7:101256755-1012723985'pad=0 3'pad=0 strand=- repeatMasking=none,-82.00;hg19_refFlat_LOC100144595:range=chr2:155294103-1553023685'pad=0,hg19_refFlat_LOC100144595:range=chr2:155294103-1553023685'pad=0 3'pad=0 strand=- repeatMasking=none,-79.70;hg19_refFlat_REL:range=chr2:61108976-611496705'pad=0,hg19_refFlat_REL:r…	NA	inter
CUST_44060_PI429285431	0.0215452	2.95253	lncRNA	ncbi	>gi|301129268|ref|NR_034176.1| Homo sapiens RUN and FYVE domain containing 4 (RUFY4), transcript variant 2, non-coding RNA	Chr2	218902657	218903294	+	NA	NA	NA	inter
CUST_23976_PI429285431	0.0336962	2.94945	lncRNA	lncipedia2.1	>lnc-UNC5CL-3:1	chr6	40469976	40470267	-	LRFN2	NA	chr6:40459976-40480132	inner
CUST_38985_PI429285431	0.000704221	2.94734	lncRNA	NONCODERv3	>n385225|NULL|lncRNA|Homosapiens||UCSCGeneNoncode|uc003ufy.2||2.3236400|-0.2495829	chr7	76668796	76671127	+	LOC100505767	hg19_refFlat_SPDYE5:range=chr7:75124435-751312615'pad=0,hg19_refFlat_SPDYE5:range=chr7:75124435-751312615'pad=0 3'pad=0 strand=+ repeatMasking=none,-96.90;hg19_refFlat_SPDYE2L:range=chr7:102292796-1023007125'pad=0,hg19_refFlat_SPDYE2L:range=chr7:102292796-1023007125'pad=0 3'pad=0 strand=+ repeatMasking=none,-92.30;hg19_refFlat_SPDYE1:range=chr7:44040625-440473675'pad=0,hg19_refFlat_SPDYE1:range=c…	NA	inter
CUST_43962_PI429285431	0.0317169	2.93812	lncRNA	ncbi	>gi|374532826|ref|NR_046259.1| Homo sapiens uncharacterized LOC100216479 (LOC100216479), transcript variant 2, non-coding RNA	Chr2	131174323	131177092	-	NA	hg19_refFlat_TEX11:range=chrX:69748945-701173965'pad=0,hg19_refFlat_TEX11:range=chrX:69748945-701173965'pad=0 3'pad=0 strand=- repeatMasking=none,-74.70;hg19_refFlat_RQCD1:range=chr2:219433678-2194589995'pad=0,hg19_refFlat_RQCD1:range=chr2:219433678-2194589995'pad=0 3'pad=0 strand=+ repeatMasking=none,-52.50;hg19_refFlat_USP4:range=chr3:49349800-493774575'pad=0,hg19_refFlat_USP4:range=chr3:493498…	NA	inter
CUST_4160_PI429285431	0.0366861	2.93041	lncRNA	gencode_v17	>transcript_id "ENST00000541404.1" | genecode_v17	chr12	9856673	9857232	+	CLEC2D	NA	chr12:9846673-9852151	inter
CUST_7806_PI429285431	0.0480503	2.92617	lncRNA	lncipedia2.1	>lnc-NFRKB-2:1	chr11	129486906	129487878	-	NA	NA	NA	inter
CUST_9318_PI429285431	0.0478565	2.91796	lncRNA	lncipedia2.1	>lnc-DHFR-2:6	chr5	80244148	80244369	-	NA	NA	NA	inter
CUST_48915_PI429285431	0.00711236	2.91526	lncRNA	UCSC	>hg19_lincRNAsTranscripts_TCONS_l2_00019530 range=chr3:129107866-129112997 5'pad=0 3'pad=0 strand=- repeatMasking=none	chr3	129107866	129109459	-	C3orf25	hg19_refFlat_IFT122:range=chr3:129159174-1292391085'pad=0,hg19_refFlat_IFT122:range=chr3:129159174-1292391085'pad=0 3'pad=0 strand=+ repeatMasking=none,-91.30chr3:129120164-129122997	NA	inter
CUST_19958_PI429285431	0.00149813	2.91447	lncRNA	lncipedia2.1	>lnc-PIGL-1:1	chr17	16250859	16251557	+	CENPV	NA	chr17:16245848-16256812	inner
CUST_38106_PI429285431	0.0233029	2.90854	lncRNA	NONCODERv3	>n381165|NULL|lncRNA|Homosapiens||UCSCGeneNoncode|uc001dqe.1||-0.0536533|-0.4174423	chr1	94317792	94319886	+	NA	NA	NA	inter
CUST_37584_PI429285431	0.00995398	2.9076	lncRNA	NONCODERv3	>n346059|NULL|lincRNA|Homosapiens|HumanlincRNA|ScriptureReconstructionLincRNAsByLuo[unpublished]|linc_luo_1609|NULL|-1.3680000|-0.2774263	chr3	98432740	98433616	-	NA	NA	NA	inter
CUST_21705_PI429285431	0.0332744	2.90435	lncRNA	lncipedia2.1	>lnc-DCBLD2-1:2	chr3	98451270	98452038	-	ST3GAL6	NA	chr3:98451572-98461492	inter
CUST_16824_PI429285431	0.00371412	2.90203	lncRNA	lncipedia2.1	>lnc-OSTC-2:1	chr4	109598952	109601951	+	OSTC	hg19_refFlat_FAM76A:range=chr1:28052592-280870925'pad=0,hg19_refFlat_FAM76A:range=chr1:28052592-280870925'pad=0 3'pad=0 strand=+ repeatMasking=none,-15.20;hg19_refFlat_IFT20:range=chr17:26655748-266590115'pad=0,hg19_refFlat_IFT20:range=chr17:26655748-266590115'pad=0 3'pad=0 strand=- repeatMasking=none,-33.80;hg19_refFlat_PPIL3:range=chr2:201736118-2017523385'pad=0,hg19_refFlat_PPIL3:range=chr2:20…	NA	inter
CUST_38612_PI429285431	0.00988375	2.89972	lncRNA	NONCODERv3	>n383733|NULL|lncRNA|Homosapiens||UCSCGeneNoncode|uc002tpz.2||1.1098600|-0.2745452	chr2	130786571	130788095	-	NA	NA	NA	inter
CUST_40196_PI429285431	0.000881905	2.89812	lncRNA	NONCODERv3	>n408016|NR_027775|lncRNA|Homosapiens||RefGeneNoncode|NR_027775||2.6876700|-0.2838427	chr7	74306893	74308215	+	STAG3L2	NA	chr7:74299267-74306731	inter
CUST_39803_PI429285431	0.00274475	2.8943	lncRNA	NONCODERv3	>n406203|NR_003664|lncRNA|Homosapiens||RefGeneNoncode|NR_003664||4.1500300|-0.2450678	chr7	72490259	72493142	-	NA	NA	NA	inter
CUST_25331_PI429285431	0.0390076	2.89402	lncRNA	lncipedia2.1	>lnc-HSP90AA1-1:2	chr14	102518864	102519314	-	DYNC1H1	NA	chr14:102508864-102517135	inter
CUST_19564_PI429285431	0.0455648	2.89293	lncRNA	lncipedia2.1	>lnc-ZNF705A-1:7	chr12	8356654	8357377	+	NA	NA	NA	inter
CUST_25980_PI429285431	0.0235695	2.8926	lncRNA	lncipedia2.1	>lnc-PLA2G15-2:1	chr16	68233698	68234884	+	NFATC3	hg19_refFlat_CYB561D1:range=chr1:110036762-1100383975'pad=0,hg19_refFlat_CYB561D1:range=chr1:110036762-1100383975'pad=0 3'pad=0 strand=+ repeatMasking=none,-78.80;hg19_refFlat_SEPP1:range=chr5:42800822-428108695'pad=0,hg19_refFlat_SEPP1:range=chr5:42800822-428108695'pad=0 3'pad=0 strand=- repeatMasking=none,-84.10;hg19_refFlat_C8orf44:range=chr8:67589944-675921895'pad=0,hg19_refFlat_C8orf44:range…	NA	inner
CUST_5379_PI429285431	0.0445418	2.89157	lncRNA	gencode_v17	>transcript_id "ENST00000562570.1" | genecode_v17	chr16	1028761	1028982	-	LMF1	NA	chr16:1015761-1031318	inter
CUST_35894_PI429285431	0.0444489	2.88934	lncRNA	NONCODERv3	>n344552|NULL|lincRNA|Homosapiens|HumanlincRNA|ScriptureReconstructionLincRNAsByLuo[unpublished]|linc_luo_100|NULL|-1.2931500|-0.3004446	chr15	25244369	25247368	+	SNRPN	hg19_refFlat_TUBGCP2:range=chr10:135093270-1351164455'pad=0,hg19_refFlat_TUBGCP2:range=chr10:135093270-1351164455'pad=0 3'pad=0 strand=- repeatMasking=none,-76.70;hg19_refFlat_GDPD2:range=chrX:69644835-696529365'pad=0,hg19_refFlat_GDPD2:range=chrX:69644835-696529365'pad=0 3'pad=0 strand=+ repeatMasking=none,-82.50;hg19_refFlat_ZNF700:range=chr19:12037391-120610685'pad=0,hg19_refFlat_ZNF700:range=…	NA	inter
LNCA_33_P3291614	0.0353513	2.88786	lncRNA	Agilent_HUMAN_G3V2	XR_110031	chr3	11605121	11605180	-	NA	NA	NA	Unknown
CUST_33752_PI429285431	0.0333042	2.88718	lncRNA	NONCODERv3	>n340532|AF181250|mRNAlikelncRNA|Homosapiens|HumanlncRNA|JounralRNA|2994|NULL|10.4430000|-0.1014007	chr5	80256557	80259556	+	RASGRF2	NA	chr5:80256558-80521953	inter
CUST_22853_PI429285431	0.02554	2.88086	lncRNA	lncipedia2.1	>lnc-FAS-3:1	chr10	90699152	90701194	+	ACTA2	hg19_refFlat_ACTC1:range=chr15:35082613-350870095'pad=0,hg19_refFlat_ACTC1:range=chr15:35082613-350870095'pad=0 3'pad=0 strand=- repeatMasking=none,-85.60;hg19_refFlat_ACTA1:range=chr1:229567246-2295688625'pad=0,hg19_refFlat_ACTA1:range=chr1:229567246-2295688625'pad=0 3'pad=0 strand=- repeatMasking=none,-86.40;hg19_refFlat_POTEE:range=chr2:131975976-1320222565'pad=0,hg19_refFlat_POTEE:range=chr2:…	NA	inner
CUST_305_PI429285431	0.0495408	2.88084	lncRNA	gencode_v17	>transcript_id "ENST00000471417.1" | genecode_v17	chr1	87595537	87596287	+	NA	NA	NA	inter
CUST_33386_PI429285431	0.0399032	2.87204	lncRNA	NONCODERv3	>n340104|CR594808|mRNAlikelncRNA|Homosapiens|HumanlncRNA|JounralRNA|2563|NULL|-0.1289430|-0.3016293	chr10	94319577	94320968	-	IDE	hg19_refFlat_TCF4:range=chr18:52895456-533031285'pad=0,hg19_refFlat_TCF4:range=chr18:52895456-533031285'pad=0 3'pad=0 strand=- repeatMasking=none,-88.70;hg19_refFlat_ADAMTS2:range=chr5:178578130-1787723295'pad=0,hg19_refFlat_ADAMTS2:range=chr5:178578130-1787723295'pad=0 3'pad=0 strand=- repeatMasking=none,-75.00;hg19_refFlat_TTF1:range=chr9:135251302-1352782085'pad=0,hg19_refFlat_TTF1:range=chr9:…	NA	inner
CUST_41006_PI429285431	0.0224374	2.8706	lncRNA	NONCODERv3	>n411552|NR_040023|lncRNA|Homosapiens||RefGeneNoncode|NR_040023||1.2811500|-0.2560209	chr16	2714389	2716724	-	KCTD5	hg19_refFlat_SEPP1:range=chr5:42800822-428108695'pad=0,hg19_refFlat_SEPP1:range=chr5:42800822-428108695'pad=0 3'pad=0 strand=- repeatMasking=none,-83.50;hg19_refFlat_CYB561D1:range=chr1:110036762-1100388815'pad=0,hg19_refFlat_CYB561D1:range=chr1:110036762-1100388815'pad=0 3'pad=0 strand=+ repeatMasking=none,-81.40;hg19_refFlat_CYB561D1:range=chr1:110036762-1100383975'pad=0,hg19_refFlat_CYB561D1:r…	NA	inter
CUST_38367_PI429285431	0.0338602	2.86275	lncRNA	NONCODERv3	>n382172|NULL|lncRNA|Homosapiens||UCSCGeneNoncode|uc001xib.2||-0.2656700|-0.3054387	chr14	65453947	65455989	+	CHURC1-FNTB	hg19_refFlat_JAM2:range=chr21:27012134-270866175'pad=0,hg19_refFlat_JAM2:range=chr21:27012134-270866175'pad=0 3'pad=0 strand=+ repeatMasking=none,-75.20;hg19_refFlat_ISY1:range=chr3:128848924-1288798185'pad=0,hg19_refFlat_ISY1:range=chr3:128848924-1288798185'pad=0 3'pad=0 strand=- repeatMasking=none,-79.10;hg19_refFlat_C8orf44:range=chr8:67589944-675921895'pad=0,hg19_refFlat_C8orf44:range=chr8:67…	NA	inner
CUST_37905_PI429285431	0.035679	2.86075	lncRNA	NONCODERv3	>n346444|NULL|lincRNA|Homosapiens|HumanlincRNA|ScriptureReconstructionLincRNAsByLuo[unpublished]|linc_luo_1994|NULL|-1.3234900|-0.1310763	chr1	23953890	23954287	+	NA	NA	NA	inter
CUST_22906_PI429285431	0.0417107	2.85789	lncRNA	lncipedia2.1	>lnc-ZNF154-1:2	chr19	58220307	58223306	-	ZNF154	hg19_refFlat_ZNF714:range=chr19:21281075-213011355'pad=0,hg19_refFlat_ZNF714:range=chr19:21281075-213011355'pad=0 3'pad=0 strand=+ repeatMasking=none,-79.70;hg19_refFlat_ZNF283:range=chr19:44337657-443527935'pad=0,hg19_refFlat_ZNF283:range=chr19:44337657-443527935'pad=0 3'pad=0 strand=+ repeatMasking=none,-82.40;hg19_refFlat_LYRM4:range=chr6:5187029-52609665'pad=0,hg19_refFlat_LYRM4:range=chr6:51…	NA	inner
LNCA_24_P927614	0.042443	2.85429	lncRNA	Agilent_HUMAN_G3V2	XR_108485	chr3	129762501	129762560	+	NA	NA	NA	Unknown
CUST_7814_PI429285431	0.0219881	2.85422	lncRNA	lncipedia2.1	>lnc-KIAA1147-2:9	chr7	141437183	141437852	-	WEE2	hg19_refFlat_WEE2:range=chr7:141408559-1414301205'pad=0,hg19_refFlat_WEE2:range=chr7:141408559-1414301205'pad=0 3'pad=0 strand=+ repeatMasking=none,-74.50chr7:141427183-141431071	NA	inter
CUST_33458_PI429285431	0.019554	2.85026	lncRNA	NONCODERv3	>n340194|CR627201|mRNAlikelncRNA|Homosapiens|HumanlncRNA|JounralRNA|2655|NULL|-0.9697260|-0.3759112	chr4	105390670	105393669	-	CXXC4	NA	chr4:105393330-105412467	inner
LNCA_21_P0010393	0.0127994	2.84963	lncRNA	Agilent_HUMAN_G3V2	TCONS_00029518	chr22	20853192	20853251	+	NA	NA	NA	Unknown
CUST_1647_PI429285431	0.0107664	2.84839	lncRNA	gencode_v17	>transcript_id "ENST00000602175.1" | genecode_v17	chr3	195435025	195435697	+	NA	NA	NA	inter
CUST_36661_PI429285431	0.0177167	2.8461	lncRNA	NONCODERv3	>n345157|NULL|lincRNA|Homosapiens|HumanlincRNA|ScriptureReconstructionLincRNAsByLuo[unpublished]|linc_luo_706|NULL|-1.2936500|-0.3024516	chr11	130731860	130734859	-	SNX19	hg19_refFlat_IFT81:range=chr12:110565186-1106057835'pad=0,hg19_refFlat_IFT81:range=chr12:110565186-1106057835'pad=0 3'pad=0 strand=+ repeatMasking=none,-75.80chr11:130745766-130754709	NA	inter
CUST_48307_PI429285431	0.0477615	2.84525	lncRNA	UCSC	>hg19_lincRNAsTranscripts_TCONS_l2_00000135 range=chr1:16974873-16976823 5'pad=0 3'pad=0 strand=+ repeatMasking=none	chr1	16974873	16975868	+	NA	NA	NA	inter
CUST_36290_PI429285431	0.02252	2.84169	lncRNA	NONCODERv3	>n344817|NULL|lincRNA|Homosapiens|HumanlincRNA|ScriptureReconstructionLincRNAsByLuo[unpublished]|linc_luo_366|NULL|-1.3159400|-0.2797017	chr1	59261826	59264825	+	NA	NA	NA	inter
CUST_33531_PI429285431	0.00261716	2.8378	lncRNA	NONCODERv3	>n340271|AK021429|mRNAlikelncRNA|Homosapiens|HumanlncRNA|JounralRNA|2732|NULL|7.4456300|-0.1607548	chr4	170037422	170039753	-	SH3RF1	NA	chr4:170027422-170192249	inner
CUST_51723_PI429285431	0.0236449	2.834	lncRNA	UCSC	>hg19_lincRNAsTranscripts_TCONS_l2_00011988 range=chr18:14221252-14226965 5'pad=0 3'pad=0 strand=- repeatMasking=none	chr18	14224252	14226774	-	LOC100652806	hg19_refFlat_ANKRD20A3:range=chr9:42368415-424104835'pad=0,hg19_refFlat_ANKRD20A3:range=chr9:42368415-424104835'pad=0 3'pad=0 strand=+ repeatMasking=none,-72.80;hg19_refFlat_CNGA1:range=chr4:47938438-479731175'pad=0,hg19_refFlat_CNGA1:range=chr4:47938438-479731175'pad=0 3'pad=0 strand=- repeatMasking=none,-76.90;hg19_refFlat_ANKRD20A4:range=chr9:69382093-694241765'pad=0,hg19_refFlat_ANKRD20A4:ran…	NA	inter
CUST_43601_PI429285431	0.00852064	2.83337	lncRNA	ncbi	>gi|374088103|ref|NR_046138.1| Homo sapiens family with sequence similarity 91, member A2 (FAM91A2), transcript variant 4, non-coding RNA	NA	NA	NA	NA	NA	NA	NA	Unknown
CUST_46976_PI429285431	0.0207162	2.83128	lncRNA	ncbi	>gi|289666794|ref|NR_033354.1| Homo sapiens zinc finger protein 519 (ZNF519), transcript variant 2, non-coding RNA	Chr18	14075989	14078269	-	NA	NA	NA	inter
CUST_21989_PI429285431	0.0204319	2.82714	lncRNA	lncipedia2.1	>lnc-TTC30B-1:5	chr2	178179524	178180051	-	NA	hg19_refFlat_C8orf44:range=chr8:67589944-675921895'pad=0,hg19_refFlat_C8orf44:range=chr8:67589944-675921895'pad=0 3'pad=0 strand=+ repeatMasking=none,-70.00;hg19_refFlat_PKP2:range=chr12:32945358-330496655'pad=0,hg19_refFlat_PKP2:range=chr12:32945358-330496655'pad=0 3'pad=0 strand=- repeatMasking=none,-75.40;hg19_refFlat_CTCFL:range=chr20:56071306-560992615'pad=0,hg19_refFlat_CTCFL:range=chr20:56…	NA	inter
CUST_45002_PI429285431	0.0324716	2.82241	lncRNA	ncbi	>gi|262205173|ref|NR_030672.1| Homo sapiens KIAA1324-like (KIAA1324L), transcript variant 3, non-coding RNA	NA	NA	NA	NA	NA	NA	NA	Unknown
CUST_3689_PI429285431	0.0248996	2.81995	lncRNA	gencode_v17	>transcript_id "ENST00000418196.2" | genecode_v17	chr10	47570513	47570696	-	NA	NA	NA	inter
CUST_9219_PI429285431	0.0413222	2.81856	lncRNA	lncipedia2.1	>lnc-ZNHIT2-2:1	chr11	64872605	64874558	-	TM7SF2	hg19_refFlat_C8orf44:range=chr8:67589944-675921895'pad=0,hg19_refFlat_C8orf44:range=chr8:67589944-675921895'pad=0 3'pad=0 strand=+ repeatMasking=none,-88.50;hg19_refFlat_ISY1:range=chr3:128848924-1288798185'pad=0,hg19_refFlat_ISY1:range=chr3:128848924-1288798185'pad=0 3'pad=0 strand=- repeatMasking=none,-88.80;hg19_refFlat_SEPP1:range=chr5:42800822-428108695'pad=0,hg19_refFlat_SEPP1:range=chr5:42…	NA	inter
LNCA_21_P0012198	0.0240191	2.81513	lncRNA	Agilent_HUMAN_G3V2	TCONS_l2_00017191	chr21	29949394	29949453	-	NA	NA	NA	Unknown
CUST_33727_PI429285431	0.00880281	2.81496	lncRNA	NONCODERv3	>n340504|CR749723|mRNAlikelncRNA|Homosapiens|HumanlncRNA|JounralRNA|2966|NULL|-0.8755300|-0.1492063	chr17	10561858	10562437	-	MYH3	NA	chr17:10551858-10560615	inter
CUST_19531_PI429285431	0.0132114	2.81461	lncRNA	lncipedia2.1	>lnc-CCDC64B-1:1	chr16	3108997	3109790	-	IL32	hg19_refFlat_MMP25:range=chr16:3096919-31090995'pad=0,hg19_refFlat_MMP25:range=chr16:3096919-31090995'pad=0 3'pad=0 strand=+ repeatMasking=none,-105.80chr16:3115313-3119371	NA	inner
CUST_7506_PI429285431	0.0337029	2.81193	lncRNA	lncipedia2.1	>lnc-KIAA1147-2:3	chr7	141437998	141438562	-	WEE2	hg19_refFlat_WEE2:range=chr7:141408559-1414301205'pad=0,hg19_refFlat_WEE2:range=chr7:141408559-1414301205'pad=0 3'pad=0 strand=+ repeatMasking=none,-74.50chr7:141427998-141431071	NA	inter
CUST_6951_PI429285431	0.0195966	2.81055	lncRNA	gencode_v17	>transcript_id "ENST00000602816.1" | genecode_v17	chr22	24080865	24081476	-	ZNF70	NA	chr22:24083772-24091476	inter
CUST_35742_PI429285431	0.0445219	2.80848	lncRNA	NONCODERv3	>n342913|CR625009|mRNAlikelncRNA|Homosapiens|HumanlncRNA|JounralRNA|5421|NULL|-1.2475200|-0.3781354	chr12	133681528	133682998	-	ZNF140	hg19_refFlat_ZNF140:range=chr12:133657907-1336832375'pad=0,hg19_refFlat_ZNF140:range=chr12:133657907-1336832375'pad=0 3'pad=0 strand=+ repeatMasking=none,-85.90chr12:133671528-133684260	NA	inner
CUST_22927_PI429285431	0.0425944	2.80698	lncRNA	lncipedia2.1	>lnc-COMMD10-2:1	chr5	115785324	115785802	+	SEMA6A	hg19_refFlat_SEMA6A:range=chr5:115782309-1158406405'pad=0,hg19_refFlat_SEMA6A:range=chr5:115782309-1158406405'pad=0 3'pad=0 strand=- repeatMasking=none,-97.50chr5:115779251-115795557	NA	inner
CUST_39458_PI429285431	0.0380869	2.80545	lncRNA	NONCODERv3	>n386976|NULL|lncRNA|Homosapiens||UCSCGeneNoncode|uc010vux.1||0.1735990|-0.2422384	chr17	8261730	8263858	-	KRBA2	hg19_refFlat_TRIM61:range=chr4:165876144-1658911545'pad=0,hg19_refFlat_TRIM61:range=chr4:165876144-1658911545'pad=0 3'pad=0 strand=- repeatMasking=none,-73.70;hg19_refFlat_TEX11:range=chrX:69748945-701173965'pad=0,hg19_refFlat_TEX11:range=chrX:69748945-701173965'pad=0 3'pad=0 strand=- repeatMasking=none,-80.10;hg19_refFlat_NEK5:range=chr13:52639543-527016185'pad=0,hg19_refFlat_NEK5:range=chr13:52…	NA	inter
CUST_29950_PI429285431	0.010298	2.80492	lncRNA	NONCODERv3	>n334153|M95729|mRNAlikelncRNA|Homosapiens|NULL|H-invitationalv7.5|HIT000196911_02|http://h-invitational.jp/hinv/spsoup/transcript_view?hit_id=HIT000196911_02|-1.0339800|-0.3140568	chr6	4012035	4012239	-	PRPF4B	NA	chr6:4021569-4022240	inter
CUST_43219_PI429285431	0.0447928	2.80318	lncRNA	ensembl.GRCh37.72	>ENST00000602558 havana:sense_intronic chromosome:GRCh37:12:124456004:124456261:-1 gene:ENSG00000270095 gene_biotype:sense_intronic transcript_biotype:sense_intronic	chr12	124456004	124456261	-	ZNF664-FAM101A	NA	chr12:124457762-124466261	inner
CUST_22671_PI429285431	0.0074041	2.79826	lncRNA	lncipedia2.1	>lnc-C10orf122-2:1	chr10	127407846	127408145	-	C10orf137	NA	chr10:127408084-127417934	inter
LNCA_21_P0005392	0.011482	2.79334	lncRNA	Agilent_HUMAN_G3V2	TCONS_00013494	chr7	66805281	66805340	+	NA	NA	NA	Unknown
LNCA_21_P0002011	0.0178086	2.793	lncRNA	Agilent_HUMAN_G3V2	ENST00000444688	chr2	8523609	8523668	-	NA	NA	NA	Unknown
CUST_46616_PI429285431	0.0310384	2.79261	lncRNA	ncbi	>gi|397139614|ref|XR_132607.2| PREDICTED: Homo sapiens uncharacterized LOC283887 (LOC283887), misc_RNA	Chr16	25078359	25080272	+	NA	hg19_refFlat_SGCE:range=chr7:94214811-942854105'pad=0,hg19_refFlat_SGCE:range=chr7:94214811-942854105'pad=0 3'pad=0 strand=- repeatMasking=none,-80.30;hg19_refFlat_FAM122C:range=chrX:133941629-1339434035'pad=0,hg19_refFlat_FAM122C:range=chrX:133941629-1339434035'pad=0 3'pad=0 strand=+ repeatMasking=none,-81.60;hg19_refFlat_CNGA1:range=chr4:47938438-479731175'pad=0,hg19_refFlat_CNGA1:range=chr4:47…	NA	inter
CUST_47318_PI429285431	0.0185656	2.78681	lncRNA	ncbi	>gi|307574675|ref|NR_036633.1| Homo sapiens VAMP (vesicle-associated membrane protein)-associated protein B and C (VAPB), transcript variant 3, non-coding RNA	Chr20	56964175	56967174	+	NA	NA	NA	inter
CUST_26940_PI429285431	0.0294961	2.7734	lncRNA	NONCODERv3	>n324020|NULL|mRNAlikelncRNA|Homosapiens|vegalncRNA|GENCODE|OTTHUMT00000053234|http://vega.sanger.ac.uk/Homo_sapiens/Transcript/Summary?db=core;t=OTTHUMT00000053234|-0.9892690|-0.2313481	chr9	97217601	97218339	-	HIATL1	hg19_refFlat_C14orf178:range=chr14:78235743-782360215'pad=0,hg19_refFlat_C14orf178:range=chr14:78235743-782360215'pad=0 3'pad=0 strand=+ repeatMasking=none,-81.80;hg19_refFlat_RAB43:range=chr3:128811357-1288403325'pad=0,hg19_refFlat_RAB43:range=chr3:128811357-1288403325'pad=0 3'pad=0 strand=- repeatMasking=none,-72.80;hg19_refFlat_C14orf178:range=chr14:78227386-782360215'pad=0,hg19_refFlat_C14orf…	NA	inner
CUST_31771_PI429285431	0.0241916	2.77099	lncRNA	NONCODERv3	>n338313|CR608740|mRNAlikelncRNA|Homosapiens|HumanlncRNA|JounralRNA|707|NULL|-0.2400820|-0.1823636	chr19	12305852	12307590	+	ZNF136	hg19_refFlat_PRR16:range=chr5:119816899-1200224045'pad=0,hg19_refFlat_PRR16:range=chr5:119816899-1200224045'pad=0 3'pad=0 strand=+ repeatMasking=none,-66.30;hg19_refFlat_USP4:range=chr3:49349800-493774575'pad=0,hg19_refFlat_USP4:range=chr3:49349800-493774575'pad=0 3'pad=0 strand=- repeatMasking=none,-74.20;hg19_refFlat_CNGA1:range=chr4:47938438-479731175'pad=0,hg19_refFlat_CNGA1:range=chr4:479384…	NA	inter
CUST_50928_PI429285431	0.00244608	2.76993	lncRNA	UCSC	>hg19_lincRNAsTranscripts_TCONS_l2_00005569 range=chr12:27282536-27350376 5'pad=0 3'pad=0 strand=+ repeatMasking=none	chr12	27282536	27283598	+	NA	NA	NA	inter
CUST_27474_PI429285431	0.0335783	2.76408	lncRNA	NONCODERv3	>n324650|NULL|mRNAlikelncRNA|Homosapiens|vegalncRNA|GENCODE|OTTHUMT00000317578|http://vega.sanger.ac.uk/Homo_sapiens/Transcript/Summary?db=core;t=OTTHUMT00000317578|0.2357880|-0.3477111	chr22	46122982	46124345	+	ATXN10	hg19_refFlat_JAM2:range=chr21:27012134-270866175'pad=0,hg19_refFlat_JAM2:range=chr21:27012134-270866175'pad=0 3'pad=0 strand=+ repeatMasking=none,-81.50;hg19_refFlat_TSFM:range=chr12:58176585-581903665'pad=0,hg19_refFlat_TSFM:range=chr12:58176585-581903665'pad=0 3'pad=0 strand=+ repeatMasking=none,-44.40;hg19_refFlat_PKP2:range=chr12:32945358-330496655'pad=0,hg19_refFlat_PKP2:range=chr12:32945358…	NA	inner
CUST_22526_PI429285431	0.0442994	2.75829	lncRNA	lncipedia2.1	>lnc-AC005003.1-1:2	chr22	31733654	31734075	+	PATZ1	NA	chr22:31723654-31742249	inner
CUST_33788_PI429285431	0.023211	2.74944	lncRNA	NONCODERv3	>n340576|AK026824|mRNAlikelncRNA|Homosapiens|HumanlncRNA|JounralRNA|3038|NULL|-0.8687020|-0.2591049	chr17	26729127	26731082	+	SARM1	hg19_refFlat_SLC46A1:range=chr17:26726672-267331325'pad=0,hg19_refFlat_SLC46A1:range=chr17:26726672-267331325'pad=0 3'pad=0 strand=- repeatMasking=none,-46.90;hg19_refFlat_TMEM67:range=chr8:94770776-948286805'pad=0,hg19_refFlat_TMEM67:range=chr8:94770776-948286805'pad=0 3'pad=0 strand=+ repeatMasking=none,-78.60;hg19_refFlat_C11orf88:range=chr11:111385510-1114075525'pad=0,hg19_refFlat_C11orf88:ra…	NA	inner
CUST_36915_PI429285431	0.00822649	2.74816	lncRNA	NONCODERv3	>n345387|NULL|lincRNA|Homosapiens|HumanlincRNA|ScriptureReconstructionLincRNAsByLuo[unpublished]|linc_luo_936|NULL|-1.5503700|-0.2582715	chr20	36127184	36129956	-	BLCAP	hg19_refFlat_ZNF714:range=chr19:21281075-213011355'pad=0,hg19_refFlat_ZNF714:range=chr19:21281075-213011355'pad=0 3'pad=0 strand=+ repeatMasking=none,-73.70;hg19_refFlat_C8orf44:range=chr8:67589944-675921895'pad=0,hg19_refFlat_C8orf44:range=chr8:67589944-675921895'pad=0 3'pad=0 strand=+ repeatMasking=none,-80.80;hg19_refFlat_ZNF429:range=chr19:21688574-217208805'pad=0,hg19_refFlat_ZNF429:range=ch…	NA	inter
CUST_38088_PI429285431	0.0480282	2.74776	lncRNA	NONCODERv3	>n381083|NULL|lncRNA|Homosapiens||UCSCGeneNoncode|uc001bhi.3||0.7367430|-0.1776985	chr1	23907984	23909762	+	NA	hg19_refFlat_ISY1:range=chr3:128848924-1288798185'pad=0,hg19_refFlat_ISY1:range=chr3:128848924-1288798185'pad=0 3'pad=0 strand=- repeatMasking=none,-85.40;hg19_refFlat_NANOGNB:range=chr12:7917882-79264475'pad=0,hg19_refFlat_NANOGNB:range=chr12:7917882-79264475'pad=0 3'pad=0 strand=+ repeatMasking=none,-88.70;hg19_refFlat_SEPP1:range=chr5:42800822-428108695'pad=0,hg19_refFlat_SEPP1:range=chr5:4280…	NA	inter
CUST_32121_PI429285431	0.0290711	2.74759	lncRNA	NONCODERv3	>n338687|AF119909|mRNAlikelncRNA|Homosapiens|HumanlncRNA|JounralRNA|1104|NULL|-0.9067000|-0.4439128	chr2	15636730	15638586	+	DDX1	NA	chr2:15626730-15648496	inter
CUST_48999_PI429285431	0.010556	2.74253	lncRNA	UCSC	>hg19_lincRNAsTranscripts_TCONS_l2_00019717 range=chr3:197330065-197354456 5'pad=0 3'pad=0 strand=- repeatMasking=none	chr3	197330065	197331494	-	NA	NA	NA	inter
CUST_35453_PI429285431	0.0298287	2.74029	lncRNA	NONCODERv3	>n342528|BX648813|mRNAlikelncRNA|Homosapiens|HumanlncRNA|JounralRNA|5024|NULL|0.3531140|-0.2538413	chr3	123427798	123430797	+	MYLK	hg19_refFlat_ZNF714:range=chr19:21281075-213011355'pad=0,hg19_refFlat_ZNF714:range=chr19:21281075-213011355'pad=0 3'pad=0 strand=+ repeatMasking=none,-75.20;hg19_refFlat_CC2D2A:range=chr4:15477557-154829095'pad=0,hg19_refFlat_CC2D2A:range=chr4:15477557-154829095'pad=0 3'pad=0 strand=+ repeatMasking=none,-77.40;hg19_refFlat_BIRC5:range=chr17:76210398-762196355'pad=0,hg19_refFlat_BIRC5:range=chr17:…	NA	inner
CUST_45671_PI429285431	0.0104351	2.73845	lncRNA	ncbi	>gi|345842333|ref|NR_045118.1| Homo sapiens uncharacterized LOC100289509 (LOC100289509), non-coding RNA	Chr10	103578825	103579800	+	NA	hg19_refFlat_KCNIP2:range=chr10:103587110-1036033255'pad=0,hg19_refFlat_KCNIP2:range=chr10:103587110-1036033255'pad=0 3'pad=0 strand=- repeatMasking=none,-96.20;hg19_refFlat_KCNIP2:range=chr10:103587110-1035995975'pad=0,hg19_refFlat_KCNIP2:range=chr10:103587110-1035995975'pad=0 3'pad=0 strand=- repeatMasking=none,-96.20;hg19_refFlat_KCNIP2:range=chr10:103587398-1036033255'pad=0,hg19_refFlat_KCNIP…	NA	inter
CUST_43075_PI429285431	0.0100617	2.73833	lncRNA	ensembl.GRCh37.72	>ENST00000408413 ncrna:snRNA chromosome:GRCh37:1:12630000:12630100:-1 gene:ENSG00000221340 gene_biotype:snRNA transcript_biotype:snRNA	chr1	12630000	12630100	-	DHRS3	NA	chr1:12627939-12640100	inner
LNCA_21_P0007167	0.0212857	2.73636	lncRNA	Agilent_HUMAN_G3V2	TCONS_00019182	chr11	358069	358128	+	NA	NA	NA	Unknown
CUST_11482_PI429285431	0.000380941	2.73629	lncRNA	lncipedia2.1	>lnc-HS3ST3A1-4:5	chr17	13681282	13683332	-	NA	NA	NA	inter
LNCA_21_P0005376	0.0133236	2.73444	lncRNA	Agilent_HUMAN_G3V2	ENST00000416708	chr7	46019546	46019605	+	NA	NA	NA	Unknown
CUST_7840_PI429285431	0.0262121	2.73348	lncRNA	lncipedia2.1	>lnc-TCF24-2:7	chr8	67837672	67838319	-	C8orf45	NA	chr8:67827672-67834283	inter
CUST_37679_PI429285431	0.00190624	2.731	lncRNA	NONCODERv3	>n346166|NULL|lincRNA|Homosapiens|HumanlincRNA|ScriptureReconstructionLincRNAsByLuo[unpublished]|linc_luo_1716|NULL|-1.5128500|-0.1291441	chr7	44027740	44028208	-	NA	NA	NA	inter
CUST_35480_PI429285431	0.0039056	2.72647	lncRNA	NONCODERv3	>n342578|BC035645|mRNAlikelncRNA|Homosapiens|HumanlncRNA|JounralRNA|5077|NULL|9.4530500|-0.2458159	chr4	22392504	22393582	-	GPR125	NA	chr4:22388999-22517672	inner
CUST_38781_PI429285431	0.00503249	2.72357	lncRNA	NONCODERv3	>n384430|NULL|lncRNA|Homosapiens||UCSCGeneNoncode|uc003gpk.1||-1.1615000|-0.3316093	chr4	17629878	17632877	+	FAM184B	hg19_refFlat_LOC100507462:range=chr6:139048604-1390946875'pad=0,hg19_refFlat_LOC100507462:range=chr6:139048604-1390946875'pad=0 3'pad=0 strand=- repeatMasking=none,-81.90;hg19_refFlat_FAM122C:range=chrX:133941629-1339434035'pad=0,hg19_refFlat_FAM122C:range=chrX:133941629-1339434035'pad=0 3'pad=0 strand=+ repeatMasking=none,-86.50;hg19_refFlat_CSF2RA:range=chrY:1351597-13783725'pad=0,hg19_refFlat_…	NA	inter
CUST_30669_PI429285431	0.032984	2.71874	lncRNA	NONCODERv3	>n336135|X92024|mRNAlikelncRNA|Homosapiens|NULL|H-invitationalv7.5|HIT000324502|http://h-invitational.jp/hinv/spsoup/transcript_view?hit_id=HIT000324502|-1.3130400|-0.3926112	chr14	22466245	22466480	+	NA	NA	NA	inter
LNCA_21_P0005240	0.039837	2.71838	lncRNA	Agilent_HUMAN_G3V2	TCONS_00013023	chr7	77299317	77299376	+	NA	NA	NA	Unknown
CUST_45640_PI429285431	0.012585	2.71814	lncRNA	ncbi	>gi|226061010|ref|NR_027429.1| Homo sapiens uncharacterized LOC219347 (LOC219347), transcript variant 2, non-coding RNA	Chr10	81805989	81808988	-	NA	hg19_refFlat_PPIL3:range=chr2:201736118-2017523385'pad=0,hg19_refFlat_PPIL3:range=chr2:201736118-2017523385'pad=0 3'pad=0 strand=- repeatMasking=none,-77.20;hg19_refFlat_ASCC1:range=chr10:73862127-739730565'pad=0,hg19_refFlat_ASCC1:range=chr10:73862127-739730565'pad=0 3'pad=0 strand=- repeatMasking=none,-83.40;hg19_refFlat_ZNF700:range=chr19:12037391-120610685'pad=0,hg19_refFlat_ZNF700:range=chr1…	NA	inter
CUST_20773_PI429285431	2.94989e-05	2.71785	lncRNA	lncipedia2.1	>lnc-FAM110A-1:1	chr20	837464	838272	+	NA	NA	NA	inter
CUST_50197_PI429285431	0.00769687	2.71707	lncRNA	UCSC	>hg19_lincRNAsTranscripts_TCONS_l2_00029723 range=chr9:42411969-42435225 5'pad=0 3'pad=0 strand=+ repeatMasking=none	chr9	42411969	42412749	+	ANKRD20A2	NA	chr9:42401969-42411410	inter
CUST_34458_PI429285431	0.0269501	2.71041	lncRNA	NONCODERv3	>n341332|AL359604|mRNAlikelncRNA|Homosapiens|HumanlncRNA|JounralRNA|3801|NULL|-1.0477200|-0.3708378	chr7	135362705	135363743	+	SLC13A4	NA	chr7:135365985-135373712	inter
CUST_21623_PI429285431	0.0366603	2.70993	lncRNA	lncipedia2.1	>lnc-CSTB-1:7	chr21	45230112	45232000	-	RRP1	NA	chr21:45220112-45223983	inter
CUST_24444_PI429285431	0.00971175	2.70773	lncRNA	lncipedia2.1	>lnc-IRF4-1:1	chr6	524873	525723	+	EXOC2	NA	chr6:514873-535581	inner
CUST_13484_PI429285431	0.0344579	2.70631	lncRNA	lncipedia2.1	>lnc-EXD2-1:2	chr14	69447943	69448683	+	ACTN1	NA	chr14:69437943-69446083	inter
LNCA_21_P0006645	0.024318	2.70272	lncRNA	Agilent_HUMAN_G3V2	ENST00000448835	chr10	6663795	6667308	+	NA	NA	NA	Unknown
CUST_47055_PI429285431	0.0489108	2.69758	lncRNA	ncbi	>gi|322303371|ref|NR_037801.1| Homo sapiens zinc finger protein 625 (ZNF625), transcript variant 2, non-coding RNA	Chr19	12255705	12257411	-	NA	hg19_refFlat_BTG3:range=chr21:18966411-189814625'pad=0,hg19_refFlat_BTG3:range=chr21:18966411-189814625'pad=0 3'pad=0 strand=- repeatMasking=none,-78.50;hg19_refFlat_AMBRA1:range=chr11:46419000-465699305'pad=0,hg19_refFlat_AMBRA1:range=chr11:46419000-465699305'pad=0 3'pad=0 strand=- repeatMasking=none,-35.50	NA	inter
CUST_40453_PI429285431	0.0415632	2.69715	lncRNA	NONCODERv3	>n409362|NR_033732|lncRNA|Homosapiens||RefGeneNoncode|NR_033732||5.9160100|-0.2703522	chrY	21617316	21620315	-	NA	hg19_refFlat_ISY1:range=chr3:128848924-1288798185'pad=0,hg19_refFlat_ISY1:range=chr3:128848924-1288798185'pad=0 3'pad=0 strand=- repeatMasking=none,-79.90;hg19_refFlat_ZNF429:range=chr19:21688574-217208805'pad=0,hg19_refFlat_ZNF429:range=chr19:21688574-217208805'pad=0 3'pad=0 strand=+ repeatMasking=none,-78.70	NA	inter
CUST_3141_PI429285431	0.0336328	2.69653	lncRNA	gencode_v17	>transcript_id "ENST00000519967.1" | genecode_v17	chr8	62738028	62738457	+	NA	NA	NA	inter
CUST_5383_PI429285431	0.0367291	2.69634	lncRNA	gencode_v17	>transcript_id "ENST00000565467.1" | genecode_v17	chr16	1028761	1029486	-	LMF1	NA	chr16:1015761-1031318	inter
CUST_22607_PI429285431	0.0136946	2.69531	lncRNA	lncipedia2.1	>lnc-PRPF18-1:1	chr10	13697378	13698807	+	FRMD4A	NA	chr10:13687378-13707929	inner
CUST_38298_PI429285431	0.0304112	2.69222	lncRNA	NONCODERv3	>n381970|NULL|lncRNA|Homosapiens||UCSCGeneNoncode|uc001ujx.1||2.1918300|-0.2142347	chr12	132602690	132605689	+	DDX51	hg19_refFlat_PLAC8:range=chr4:84015840-840290745'pad=0,hg19_refFlat_PLAC8:range=chr4:84015840-840290745'pad=0 3'pad=0 strand=- repeatMasking=none,-87.10chr12:132621139-132623429	NA	inter
LNCA_21_P0009373	0.0313171	2.68942	lncRNA	Agilent_HUMAN_G3V2	TCONS_00025791	chr17	56542	56601	+	NA	NA	NA	Unknown
CUST_35942_PI429285431	0.0491723	2.68856	lncRNA	NONCODERv3	>n344579|NULL|lincRNA|Homosapiens|HumanlincRNA|ScriptureReconstructionLincRNAsByLuo[unpublished]|linc_luo_127|NULL|-1.6503300|-0.2997794	chrX	56778875	56779616	-	NA	hg19_refFlat_PDLIM5:range=chr4:95376440-953777095'pad=0,hg19_refFlat_PDLIM5:range=chr4:95376440-953777095'pad=0 3'pad=0 strand=+ repeatMasking=none,-80.50;hg19_refFlat_NOP2:range=chr12:6666159-66770845'pad=0,hg19_refFlat_NOP2:range=chr12:6666159-66770845'pad=0 3'pad=0 strand=- repeatMasking=none,-81.00;hg19_refFlat_OSTC:range=chr4:109571812-1095884135'pad=0,hg19_refFlat_OSTC:range=chr4:109571812-…	NA	inter
CUST_26566_PI429285431	0.0209161	2.68703	lncRNA	lncipedia2.1	>lnc-BAZ1A-1:3	chr14	35451636	35452235	-	SRP54	NA	chr14:35452104-35461698	inter
CUST_16420_PI429285431	0.0302621	2.68479	lncRNA	lncipedia2.1	>lnc-ZFP90-1:1	chr16	68609694	68609954	+	ZFP90	NA	chr16:68599694-68601039	inter
CUST_38299_PI429285431	0.0173674	2.68334	lncRNA	NONCODERv3	>n381970|NULL|lncRNA|Homosapiens||UCSCGeneNoncode|uc001ujx.1||2.1918300|-0.2142347	chr12	132605690	132607024	+	DDX51	hg19_refFlat_PLAC8:range=chr4:84015840-840290745'pad=0,hg19_refFlat_PLAC8:range=chr4:84015840-840290745'pad=0 3'pad=0 strand=- repeatMasking=none,-87.10chr12:132621139-132623429	NA	inter
CUST_33512_PI429285431	0.0163542	2.67603	lncRNA	NONCODERv3	>n340251|AK093177|mRNAlikelncRNA|Homosapiens|HumanlncRNA|JounralRNA|2712|NULL|-1.2269600|-0.3044572	chr4	147111637	147114339	+	LSM6	NA	chr4:147101637-147111213	inter
CUST_12475_PI429285431	0.0248344	2.67456	lncRNA	lncipedia2.1	>lnc-ZFP90-1:2	chr16	68610029	68610402	+	ZFP90	NA	chr16:68600029-68601039	inter
CUST_25502_PI429285431	0.014328	2.66907	lncRNA	lncipedia2.1	>lnc-RP11-110I1.12.1-2:1	chr11	118875189	118875711	-	CCDC84	hg19_refFlat_STAP2:range=chr19:4324130-43387505'pad=0,hg19_refFlat_STAP2:range=chr19:4324130-43387505'pad=0 3'pad=0 strand=- repeatMasking=none,-79.10;hg19_refFlat_FBXO18:range=chr10:5948065-59792435'pad=0,hg19_refFlat_FBXO18:range=chr10:5948065-59792435'pad=0 3'pad=0 strand=+ repeatMasking=none,-41.82;hg19_refFlat_ZNF700:range=chr19:12037391-120610685'pad=0,hg19_refFlat_ZNF700:range=chr19:120373…	NA	inner
CUST_13743_PI429285431	0.0481138	2.6664	lncRNA	lncipedia2.1	>lnc-C1D-3:4	chr2	67440771	67441527	-	NA	NA	NA	inter
CUST_4116_PI429285431	0.020578	2.6656	lncRNA	gencode_v17	>transcript_id "ENST00000525716.2" | genecode_v17	chr11	130736149	130739148	-	SNX19	NA	chr11:130745766-130750142	inter
LNCA_21_P0009299	0.0381081	2.66353	lncRNA	Agilent_HUMAN_G3V2	ENST00000423323	chr17	13679960	13680019	-	NA	NA	NA	Unknown
CUST_40598_PI429285431	0.00257892	2.66261	lncRNA	NONCODERv3	>n410070|NR_036508|lncRNA|Homosapiens||RefGeneNoncode|NR_036508||-0.1461750|-0.2375230	chr19	58514261	58516157	+	ZNF606	hg19_refFlat_CHID1:range=chr11:869858-9048165'pad=0,hg19_refFlat_CHID1:range=chr11:869858-9048165'pad=0 3'pad=0 strand=- repeatMasking=none,-53.60;hg19_refFlat_STAP2:range=chr19:4324130-43387505'pad=0,hg19_refFlat_STAP2:range=chr19:4324130-43387505'pad=0 3'pad=0 strand=- repeatMasking=none,-80.30;hg19_refFlat_BRD2:range=chr6_cox_hap2:4385214-43930395'pad=0,hg19_refFlat_BRD2:range=chr6_cox_hap2:43…	NA	inner
LNCA_21_P0011657	0.0172229	2.66197	lncRNA	Agilent_HUMAN_G3V2	TCONS_l2_00011988	chr18	14221293	14221352	-	NA	NA	NA	Unknown
CUST_31382_PI429285431	0.0356476	2.66156	lncRNA	NONCODERv3	>n337848|AF075070|mRNAlikelncRNA|Homosapiens|HumanlncRNA|JounralRNA|231|NULL|-1.1604300|-0.3022094	chr1	33750115	33750575	+	ZNF362	NA	chr1:33740115-33760576	inner
CUST_49688_PI429285431	0.00650001	2.65979	lncRNA	UCSC	>hg19_lincRNAsTranscripts_TCONS_l2_00027038 range=chr7:5862847-5879673 5'pad=0 3'pad=0 strand=+ repeatMasking=none	chr7	5862847	5863428	+	NA	NA	NA	inter
LNCA_21_P0011165	0.0166319	2.65838	lncRNA	Agilent_HUMAN_G3V2	TCONS_l2_00007037	chr13	114943130	114943189	+	NA	NA	NA	Unknown
CUST_40145_PI429285431	0.0440056	2.65806	lncRNA	NONCODERv3	>n407766|NR_027287|lncRNA|Homosapiens||RefGeneNoncode|NR_027287||0.1748390|-0.0990199	chr20	62587736	62588306	+	UCKL1	hg19_refFlat_UGT2A1:range=chr4:70455090-705133625'pad=0,hg19_refFlat_UGT2A1:range=chr4:70455090-705133625'pad=0 3'pad=0 strand=- repeatMasking=none,-86.40;hg19_refFlat_UTY:range=chrY:15434994-155915455'pad=0,hg19_refFlat_UTY:range=chrY:15434994-155915455'pad=0 3'pad=0 strand=- repeatMasking=none,-81.80;hg19_refFlat_BCAS4:range=chr20:49411531-494930725'pad=0,hg19_refFlat_BCAS4:range=chr20:49411531…	NA	inter
LNCA_21_P0014886	0.0413979	2.65351	lncRNA	Agilent_HUMAN_G3V2	XR_132804	chr1	32670407	32670466	-	NA	NA	NA	Unknown
CUST_21347_PI429285431	0.013143	2.65225	lncRNA	lncipedia2.1	>lnc-SLC6A12-4:1	chr12	220785	221370	-	IQSEC3	NA	chr12:210785-231016	inner
CUST_30716_PI429285431	0.0136967	2.64908	lncRNA	NONCODERv3	>n336260|Y08267|mRNAlikelncRNA|Homosapiens|NULL|H-invitationalv7.5|HIT000325431|http://h-invitational.jp/hinv/spsoup/transcript_view?hit_id=HIT000325431|0.9383220|-0.1457252	chr12	49426710	49427421	+	MLL2	hg19_refFlat_MLL2:range=chr12:49415563-494491075'pad=0,hg19_refFlat_MLL2:range=chr12:49415563-494491075'pad=0 3'pad=0 strand=- repeatMasking=none,-106.70chr12:49416710-49437422	NA	inner
CUST_28977_PI429285431	0.0117346	2.64784	lncRNA	NONCODERv3	>n326458|NULL|mRNAlikelncRNA|Homosapiens|vegalncRNA|GENCODE|OTTHUMT00000034530|http://vega.sanger.ac.uk/Homo_sapiens/Transcript/Summary?db=core;t=OTTHUMT00000034530|-1.0658500|-1.0000000	chr1	119672397	119672787	+	WARS2	NA	chr1:119662397-119683295	inner
CUST_3645_PI429285431	0.0194326	2.64648	lncRNA	gencode_v17	>transcript_id "ENST00000416310.1" | genecode_v17	chr10	31012180	31012587	+	NA	NA	NA	inter
CUST_41804_PI429285431	0.0349426	2.64589	lncRNA	ensembl.GRCh37.72	>ENST00000578823 ncrna:miRNA chromosome:GRCh37:19:20001968:20002050:1 gene:ENSG00000265339 gene_biotype:miRNA transcript_biotype:miRNA	chr19	20001968	20002050	+	ZNF93	NA	chr19:20011722-20012050	inner
CUST_19351_PI429285431	0.00490988	2.64269	lncRNA	lncipedia2.1	>lnc-POLR3E-2:2	chr16	22389462	22390072	+	CDR2	NA	chr16:22379462-22385938	inter
CUST_26046_PI429285431	0.0210629	2.64242	lncRNA	lncipedia2.1	>lnc-FGFR4-1:1	chr5	176479395	176480139	+	ZNF346	hg19_refFlat_YIF1B:range=chr19:38796129-388065575'pad=0,hg19_refFlat_YIF1B:range=chr19:38796129-388065575'pad=0 3'pad=0 strand=- repeatMasking=none,-80.70;hg19_refFlat_JAM2:range=chr21:27012134-270866175'pad=0,hg19_refFlat_JAM2:range=chr21:27012134-270866175'pad=0 3'pad=0 strand=+ repeatMasking=none,-81.00;hg19_refFlat_ISY1:range=chr3:128848924-1288798185'pad=0,hg19_refFlat_ISY1:range=chr3:128848…	NA	inner
CUST_7576_PI429285431	0.0448761	2.64182	lncRNA	lncipedia2.1	>lnc-EXOSC6-2:1	chr16	70207031	70209272	-	CLEC18C	NA	chr16:70207928-70217351	inter
CUST_9328_PI429285431	0.0354024	2.64179	lncRNA	lncipedia2.1	>lnc-CRYBA4-1:51	chr22	27238275	27238540	+	NA	NA	NA	inter
CUST_11242_PI429285431	0.0154184	2.63902	lncRNA	lncipedia2.1	>lnc-RAB40AL-1:3	chrX	102216534	102219406	+	NA	NA	NA	inter
CUST_48280_PI429285431	0.00468992	2.63805	lncRNA	UCSC	>hg19_lincRNAsTranscripts_TCONS_l2_00001049 range=chr1:16944766-16950434 5'pad=0 3'pad=0 strand=- repeatMasking=none	chr1	16944766	16947765	-	NBPF1	hg19_refFlat_NXNL2:range=chr9:91150350-911861075'pad=0,hg19_refFlat_NXNL2:range=chr9:91150350-911861075'pad=0 3'pad=0 strand=+ repeatMasking=none,-89.30;hg19_refFlat_USP4:range=chr3:49349800-493774575'pad=0,hg19_refFlat_USP4:range=chr3:49349800-493774575'pad=0 3'pad=0 strand=- repeatMasking=none,-76.10;hg19_refFlat_WDR27:range=chr6:169857687-1700891015'pad=0,hg19_refFlat_WDR27:range=chr6:16985768…	NA	inter
CUST_35074_PI429285431	0.00114095	2.62971	lncRNA	NONCODERv3	>n342028|BC038547|mRNAlikelncRNA|Homosapiens|HumanlncRNA|JounralRNA|4509|NULL|-1.0899800|-0.1620852	chr12	116971239	116971697	+	NA	NA	NA	inter
CUST_1648_PI429285431	0.00313883	2.62832	lncRNA	gencode_v17	>transcript_id "ENST00000601955.1" | genecode_v17	chr3	195435025	195436147	+	NA	NA	NA	inter
CUST_13108_PI429285431	0.0139545	2.62794	lncRNA	lncipedia2.1	>lnc-ASB15-2:1	chr7	123175659	123175980	+	IQUB	hg19_refFlat_ZNF714:range=chr19:21281075-213011355'pad=0,hg19_refFlat_ZNF714:range=chr19:21281075-213011355'pad=0 3'pad=0 strand=+ repeatMasking=none,-72.00;hg19_refFlat_C8orf44:range=chr8:67589944-675921895'pad=0,hg19_refFlat_C8orf44:range=chr8:67589944-675921895'pad=0 3'pad=0 strand=+ repeatMasking=none,-71.70chr7:123165659-123174718	NA	inter
CUST_20366_PI429285431	0.0200866	2.62754	lncRNA	lncipedia2.1	>lnc-TIMM9-2:9	chr14	58764673	58765276	-	ARID4A	hg19_refFlat_FAM115C:range=chr7:143412963-1434247605'pad=0,hg19_refFlat_FAM115C:range=chr7:143412963-1434247605'pad=0 3'pad=0 strand=+ repeatMasking=none,-75.90;hg19_refFlat_RQCD1:range=chr2:219433678-2194589995'pad=0,hg19_refFlat_RQCD1:range=chr2:219433678-2194589995'pad=0 3'pad=0 strand=+ repeatMasking=none,-30.10;hg19_refFlat_BTG3:range=chr21:18966411-189814625'pad=0,hg19_refFlat_BTG3:range=ch…	NA	inter
CUST_10111_PI429285431	0.0262063	2.62068	lncRNA	lncipedia2.1	>lnc-AL137145.1-3:1	chr10	6663672	6664309	+	NA	NA	NA	inter
CUST_28295_PI429285431	0.0342613	2.6198	lncRNA	NONCODERv3	>n325598|NULL|mRNAlikelncRNA|Homosapiens|vegalncRNA|GENCODE|OTTHUMT00000126738|http://vega.sanger.ac.uk/Homo_sapiens/Transcript/Summary?db=core;t=OTTHUMT00000126738|0.0170657|-0.2847991	chr15	23281070	23283560	-	NA	hg19_refFlat_ZNF829:range=chr19:37382394-374068565'pad=0,hg19_refFlat_ZNF829:range=chr19:37382394-374068565'pad=0 3'pad=0 strand=- repeatMasking=none,-73.80;hg19_refFlat_MAP4K1:range=chr19:39078450-391085355'pad=0,hg19_refFlat_MAP4K1:range=chr19:39078450-391085355'pad=0 3'pad=0 strand=- repeatMasking=none,-81.60;hg19_refFlat_MRPL10:range=chr17:45901571-459065865'pad=0,hg19_refFlat_MRPL10:range=ch…	NA	inter
CUST_9901_PI429285431	0.00242777	2.6177	lncRNA	lncipedia2.1	>lnc-MAP1LC3B2-2:6	chr12	116974158	116976872	+	NA	hg19_refFlat_C8orf44:range=chr8:67589944-675921895'pad=0,hg19_refFlat_C8orf44:range=chr8:67589944-675921895'pad=0 3'pad=0 strand=+ repeatMasking=none,-84.40;hg19_refFlat_PKP2:range=chr12:32945358-330496655'pad=0,hg19_refFlat_PKP2:range=chr12:32945358-330496655'pad=0 3'pad=0 strand=- repeatMasking=none,-84.00;hg19_refFlat_ISY1:range=chr3:128848924-1288798185'pad=0,hg19_refFlat_ISY1:range=chr3:1288…	NA	inter
CUST_35204_PI429285431	0.0312877	2.61591	lncRNA	NONCODERv3	>n342187|AK094428|mRNAlikelncRNA|Homosapiens|HumanlncRNA|JounralRNA|4677|NULL|-1.1500600|-0.3662874	chr6	170886168	170888914	+	PDCD2	hg19_refFlat_PDCD2:range=chr6:170886647-1708936695'pad=0,hg19_refFlat_PDCD2:range=chr6:170886647-1708936695'pad=0 3'pad=0 strand=- repeatMasking=none,-91.40chr6:170884660-170893780	NA	inner
CUST_8922_PI429285431	0.0332033	2.61295	lncRNA	lncipedia2.1	>lnc-SEMA4B-2:1	chr15	90621052	90623770	+	ZNF710	hg19_refFlat_ASCC1:range=chr10:73862127-739730565'pad=0,hg19_refFlat_ASCC1:range=chr10:73862127-739730565'pad=0 3'pad=0 strand=- repeatMasking=none,-83.50;hg19_refFlat_ZNF195:range=chr11:3380348-34002705'pad=0,hg19_refFlat_ZNF195:range=chr11:3380348-34002705'pad=0 3'pad=0 strand=- repeatMasking=none,-76.70;hg19_refFlat_TMEM67:range=chr8:94770776-948286805'pad=0,hg19_refFlat_TMEM67:range=chr8:9477…	NA	inner
CUST_5002_PI429285431	0.0180859	2.61045	lncRNA	gencode_v17	>transcript_id "ENST00000452514.2" | genecode_v17	chr14	101295948	101296408	+	NA	NA	NA	inter
CUST_38428_PI429285431	0.0438976	2.61016	lncRNA	NONCODERv3	>n382518|NULL|lncRNA|Homosapiens||UCSCGeneNoncode|uc001zyj.2||-0.4446100|-0.4186703	chr15	50647749	50650333	+	GABPB1	hg19_refFlat_TEX11:range=chrX:69748945-701173965'pad=0,hg19_refFlat_TEX11:range=chrX:69748945-701173965'pad=0 3'pad=0 strand=- repeatMasking=none,-72.90;hg19_refFlat_MAP4K1:range=chr19:39078450-391085355'pad=0,hg19_refFlat_MAP4K1:range=chr19:39078450-391085355'pad=0 3'pad=0 strand=- repeatMasking=none,-85.50;hg19_refFlat_BTG3:range=chr21:18966411-189814625'pad=0,hg19_refFlat_BTG3:range=chr21:1896…	NA	inter
LNCA_21_P0009721	0.0392533	2.60611	lncRNA	Agilent_HUMAN_G3V2	TCONS_00027012	chr19	37177670	37177729	+	NA	NA	NA	Unknown
CUST_21855_PI429285431	0.0377894	2.60608	lncRNA	lncipedia2.1	>lnc-DLX2-2:1	chr2	173292948	173293505	-	ITGA6	hg19_refFlat_ITGA6:range=chr2:173292517-1733689805'pad=0,hg19_refFlat_ITGA6:range=chr2:173292517-1733689805'pad=0 3'pad=0 strand=+ repeatMasking=none,-101.20;hg19_refFlat_ITGA6:range=chr2:173292517-1733666075'pad=0,hg19_refFlat_ITGA6:range=chr2:173292517-1733666075'pad=0 3'pad=0 strand=+ repeatMasking=none,-101.20chr2:173292314-173303331	NA	inner
CUST_45127_PI429285431	0.0188027	2.60595	lncRNA	ncbi	>gi|310124657|ref|XR_110811.1| PREDICTED: Homo sapiens uncharacterized LOC100507312, transcript variant 1 (LOC100507312), misc_RNA	NT_113901.1	137966	139326	+	NA	hg19_refFlat_ZNF283:range=chr19:44337657-443527935'pad=0,hg19_refFlat_ZNF283:range=chr19:44337657-443527935'pad=0 3'pad=0 strand=+ repeatMasking=none,-88.40;hg19_refFlat_TCEANC:range=chrX:13677806-136816835'pad=0,hg19_refFlat_TCEANC:range=chrX:13677806-136816835'pad=0 3'pad=0 strand=+ repeatMasking=none,-72.70;hg19_refFlat_ZNF700:range=chr19:12037391-120610685'pad=0,hg19_refFlat_ZNF700:range=chr1…	NA	Unknown
CUST_5377_PI429285431	0.0242597	2.60441	lncRNA	gencode_v17	>transcript_id "ENST00000565139.1" | genecode_v17	chr16	1025761	1026144	-	LMF1	NA	chr16:1015761-1031318	inter
CUST_24471_PI429285431	0.0316688	2.60152	lncRNA	lncipedia2.1	>lnc-GSN-2:1	chr9	124214253	124214692	+	NA	NA	NA	inter
CUST_36418_PI429285431	0.0275043	2.60076	lncRNA	NONCODERv3	>n344934|NULL|lincRNA|Homosapiens|HumanlincRNA|ScriptureReconstructionLincRNAsByLuo[unpublished]|linc_luo_483|NULL|-1.2951200|-0.3220261	chr6	167394322	167397321	-	FGFR1OP	hg19_refFlat_TEX11:range=chrX:69748945-701173965'pad=0,hg19_refFlat_TEX11:range=chrX:69748945-701173965'pad=0 3'pad=0 strand=- repeatMasking=none,-79.70;hg19_refFlat_FAM122C:range=chrX:133941629-1339434035'pad=0,hg19_refFlat_FAM122C:range=chrX:133941629-1339434035'pad=0 3'pad=0 strand=+ repeatMasking=none,-88.20;hg19_refFlat_CSF2RA:range=chrX:1401597-14283725'pad=0,hg19_refFlat_CSF2RA:range=chrX:…	NA	inter
CUST_47506_PI429285431	0.0209311	2.59983	lncRNA	ncbi	>gi|310124117|ref|XR_109708.1| PREDICTED: Homo sapiens uncharacterized protein MGC15705 (MGC15705), misc_RNA	NA	NA	NA	NA	NA	NA	NA	Unknown
CUST_18872_PI429285431	0.037662	2.59889	lncRNA	lncipedia2.1	>lnc-ARHGEF35-1:10	chr7	144052431	144053191	-	ARHGEF5	NA	chr7:144052489-144062461	inter
CUST_45636_PI429285431	0.00971062	2.59598	lncRNA	ncbi	>gi|226061032|ref|NR_027432.1| Homo sapiens uncharacterized LOC219347 (LOC219347), transcript variant 5, non-coding RNA	Chr10	81805989	81808988	-	NA	hg19_refFlat_TEX11:range=chrX:69748945-701173965'pad=0,hg19_refFlat_TEX11:range=chrX:69748945-701173965'pad=0 3'pad=0 strand=- repeatMasking=none,-73.00;hg19_refFlat_RTBDN:range=chr19:12937421-129459125'pad=0,hg19_refFlat_RTBDN:range=chr19:12937421-129459125'pad=0 3'pad=0 strand=- repeatMasking=none,-79.90;hg19_refFlat_NPC1L1:range=chr7:44553046-445808585'pad=0,hg19_refFlat_NPC1L1:range=chr7:4455…	NA	inter
CUST_5376_PI429285431	0.0280013	2.59596	lncRNA	gencode_v17	>transcript_id "ENST00000567961.1" | genecode_v17	chr16	1025761	1026204	-	LMF1	NA	chr16:1015761-1031318	inter
CUST_43602_PI429285431	0.0112333	2.59012	lncRNA	ncbi	>gi|374088104|ref|NR_046139.1| Homo sapiens family with sequence similarity 91, member A2 (FAM91A2), transcript variant 5, non-coding RNA	NA	NA	NA	NA	NA	NA	NA	Unknown
CUST_23853_PI429285431	0.00787947	2.58475	lncRNA	lncipedia2.1	>lnc-GTF2IRD2B-2:1	chr7	74863859	74864631	+	GATSL2	NA	chr7:74853859-74867341	inner
CUST_47865_PI429285431	0.0382051	2.58419	lncRNA	ncbi	>gi|410171204|ref|XR_171193.1| PREDICTED: Homo sapiens myomegalin-like (LOC101060463), misc_RNA	NA	NA	NA	NA	NA	NA	NA	Unknown
CUST_8445_PI429285431	0.0408056	2.58379	lncRNA	lncipedia2.1	>lnc-TESC-1:1	chr12	117426459	117427654	-	FBXW8	hg19_refFlat_ZNF91:range=chr19:23542205-235781565'pad=0,hg19_refFlat_ZNF91:range=chr19:23542205-235781565'pad=0 3'pad=0 strand=- repeatMasking=none,-77.10;hg19_refFlat_FBXW8:range=chr12:117348843-1174659775'pad=0,hg19_refFlat_FBXW8:range=chr12:117348843-1174659775'pad=0 3'pad=0 strand=+ repeatMasking=none,-92.50;hg19_refFlat_ZNF714:range=chr19:21281075-213011355'pad=0,hg19_refFlat_ZNF714:range=ch…	NA	inner
CUST_11148_PI429285431	0.0441845	2.58295	lncRNA	lncipedia2.1	>lnc-RASA1-3:20	chr5	87581561	87581930	+	NA	NA	NA	inter
CUST_24009_PI429285431	0.0463197	2.58198	lncRNA	lncipedia2.1	>lnc-ARC-1:3	chr8	143751350	143754174	-	PSCA	NA	chr8:143751726-143761388	inner
CUST_36862_PI429285431	0.0231727	2.58011	lncRNA	NONCODERv3	>n345332|NULL|lincRNA|Homosapiens|HumanlincRNA|ScriptureReconstructionLincRNAsByLuo[unpublished]|linc_luo_881|NULL|-1.2869000|-0.2538649	chr16	67526664	67529133	+	AGRP	hg19_refFlat_FAM122C:range=chrX:133941629-1339434035'pad=0,hg19_refFlat_FAM122C:range=chrX:133941629-1339434035'pad=0 3'pad=0 strand=+ repeatMasking=none,-79.80;hg19_refFlat_C14orf178:range=chr14:78227386-782360215'pad=0,hg19_refFlat_C14orf178:range=chr14:78227386-782360215'pad=0 3'pad=0 strand=+ repeatMasking=none,-88.00;hg19_refFlat_ADRA1A:range=chr8:26606107-267224865'pad=0,hg19_refFlat_ADRA1A…	NA	inter
CUST_48163_PI429285431	0.0260709	2.57741	lncRNA	ncbi	>gi|410169943|ref|XR_111668.3| PREDICTED: Homo sapiens uncharacterized LOC100506974 (LOC100506974), misc_RNA	NA	NA	NA	NA	NA	hg19_refFlat_FBLIM1:range=chr1:16091479-161015265'pad=0,hg19_refFlat_FBLIM1:range=chr1:16091479-161015265'pad=0 3'pad=0 strand=+ repeatMasking=none,-88.80;hg19_refFlat_CAGE1:range=chr6:7329398-73874065'pad=0,hg19_refFlat_CAGE1:range=chr6:7329398-73874065'pad=0 3'pad=0 strand=- repeatMasking=none,-73.40;hg19_refFlat_PKP2:range=chr12:32945358-330496655'pad=0,hg19_refFlat_PKP2:range=chr12:32945358-3…	NA	Unknown
CUST_31058_PI429285431	0.0425702	2.57365	lncRNA	NONCODERv3	>n337282|BC128124|mRNAlikelncRNA|Homosapiens|NULL|H-invitationalv7.5|HIT000389652|http://h-invitational.jp/hinv/spsoup/transcript_view?hit_id=HIT000389652|-1.3990500|-0.4358472	chr11	73882787	73883601	+	C2CD3	NA	chr11:73872787-73882064	inner
CUST_10148_PI429285431	0.0317867	2.57079	lncRNA	lncipedia2.1	>lnc-CCDC71L-1:2	chr7	106280206	106280748	-	NA	NA	NA	inter
CUST_40452_PI429285431	0.0460482	2.56632	lncRNA	NONCODERv3	>n409360|NR_033725|lncRNA|Homosapiens||RefGeneNoncode|NR_033725||-0.2028680|-0.3000372	chr3	180704967	180706191	-	FXR1	NA	chr3:180694967-180700541	inter
CUST_23555_PI429285431	0.0425998	2.56325	lncRNA	lncipedia2.1	>lnc-RPLP1-2:4	chr15	69988006	69988550	+	NA	NA	NA	inter
CUST_21624_PI429285431	0.0465875	2.5615	lncRNA	lncipedia2.1	>lnc-RBL2-2:1	chr16	53203094	53203603	+	CHD9	NA	chr16:53193094-53213362	inner
CUST_35710_PI429285431	0.0444041	2.56078	lncRNA	NONCODERv3	>n342877|AJ420454|mRNAlikelncRNA|Homosapiens|HumanlncRNA|JounralRNA|5382|NULL|-1.1439700|-0.2930428	chr9	116817670	116818913	+	ZNF618	NA	chr9:116807670-116818875	inner
CUST_43857_PI429285431	0.0168453	2.5593	lncRNA	ncbi	>gi|374429546|ref|NR_046234.1| Homo sapiens WD repeat domain 92 (WDR92), transcript variant 3, non-coding RNA	Chr2	68361216	68362705	-	NA	NA	NA	inter
CUST_5381_PI429285431	0.0343079	2.559	lncRNA	gencode_v17	>transcript_id "ENST00000568394.1" | genecode_v17	chr16	1028761	1029103	-	LMF1	NA	chr16:1015761-1031318	inter
CUST_26709_PI429285431	0.00576711	2.55817	lncRNA	NONCODERv3	>n1834|AF400486|UBE3AantisenseRNA|Homosapiens|UBE3AantisenseRNA|NONCODEv2.0|n1834|NULL|-1.5906100|-0.1725533	chr15	25299013	25302012	+	SNRPN	NA	chr15:25289013-25370804	inter
CUST_26417_PI429285431	0.0456739	2.55685	lncRNA	lncipedia2.1	>lnc-CHURC1-FNTB-1:3	chr14	65560350	65560948	+	MAX	hg19_refFlat_MAX:range=chr14:65472922-655690575'pad=0,hg19_refFlat_MAX:range=chr14:65472922-655690575'pad=0 3'pad=0 strand=- repeatMasking=none,-84.80;hg19_refFlat_MAX:range=chr14:65543194-655690575'pad=0,hg19_refFlat_MAX:range=chr14:65543194-655690575'pad=0 3'pad=0 strand=- repeatMasking=none,-84.80;hg19_refFlat_MAX:range=chr14:65544130-655690575'pad=0,hg19_refFlat_MAX:range=chr14:65544130-65569…	NA	inner
CUST_18473_PI429285431	0.0496486	2.55665	lncRNA	lncipedia2.1	>lnc-RASA1-3:6	chr5	87571728	87572136	+	TMEM161B	hg19_refFlat_MYL10:range=chr7:101256755-1012723985'pad=0,hg19_refFlat_MYL10:range=chr7:101256755-1012723985'pad=0 3'pad=0 strand=- repeatMasking=none,-67.60chr5:87561728-87564665	NA	inter
CUST_50681_PI429285431	0.0482851	2.55372	lncRNA	UCSC	>hg19_lincRNAsTranscripts_TCONS_l2_00004169 range=chr10:46744225-46762776 5'pad=0 3'pad=0 strand=- repeatMasking=none	chr10	46750225	46752213	-	NA	hg19_refFlat_NUDT7:range=chr16:77756480-777755495'pad=0,hg19_refFlat_NUDT7:range=chr16:77756480-777755495'pad=0 3'pad=0 strand=+ repeatMasking=none,-71.10;hg19_refFlat_FBLIM1:range=chr1:16091479-161015265'pad=0,hg19_refFlat_FBLIM1:range=chr1:16091479-161015265'pad=0 3'pad=0 strand=+ repeatMasking=none,-77.70;hg19_refFlat_RHBG:range=chr1:156339204-1563546375'pad=0,hg19_refFlat_RHBG:range=chr1:1563…	NA	inter
CUST_36710_PI429285431	0.0118352	2.55283	lncRNA	NONCODERv3	>n345197|NULL|lincRNA|Homosapiens|HumanlincRNA|ScriptureReconstructionLincRNAsByLuo[unpublished]|linc_luo_746|NULL|-1.3517400|-0.2884354	chr13	45924524	45927523	-	TPT1	hg19_refFlat_GDPD2:range=chrX:69644835-696529365'pad=0,hg19_refFlat_GDPD2:range=chrX:69644835-696529365'pad=0 3'pad=0 strand=+ repeatMasking=none,-86.10;hg19_refFlat_TBXA2R:range=chr19:3594834-36006325'pad=0,hg19_refFlat_TBXA2R:range=chr19:3594834-36006325'pad=0 3'pad=0 strand=- repeatMasking=none,-72.70;hg19_refFlat_MYL10:range=chr7:101256755-1012723985'pad=0,hg19_refFlat_MYL10:range=chr7:101256…	NA	inter
CUST_44639_PI429285431	0.0160908	2.55184	lncRNA	ncbi	>gi|397139116|ref|XR_132722.2| PREDICTED: Homo sapiens uncharacterized LOC100507427 (LOC100507427), misc_RNA	NA	NA	NA	NA	NA	NA	NA	Unknown
LNCA_19_P00807374	0.0155692	2.5508	lncRNA	Agilent_HUMAN_G3V2	TCONS_l2_00020391	chr4	6678116	6678175	+	NA	NA	NA	Unknown
CUST_9908_PI429285431	0.0394237	2.54809	lncRNA	lncipedia2.1	>lnc-ZNF736-2:1	chr7	63849266	63849639	+	NA	NA	NA	inter
CUST_38567_PI429285431	0.0171166	2.54631	lncRNA	NONCODERv3	>n383521|NULL|lncRNA|Homosapiens||UCSCGeneNoncode|uc002pda.1||-0.0188235|-0.2441422	chr19	46217644	46220638	-	FBXO46	hg19_refFlat_SEPP1:range=chr5:42800822-428108695'pad=0,hg19_refFlat_SEPP1:range=chr5:42800822-428108695'pad=0 3'pad=0 strand=- repeatMasking=none,-83.70;hg19_refFlat_BIRC5:range=chr17:76210398-762196355'pad=0,hg19_refFlat_BIRC5:range=chr17:76210398-762196355'pad=0 3'pad=0 strand=+ repeatMasking=none,-83.80;hg19_refFlat_CC2D2A:range=chr4:15477557-154829095'pad=0,hg19_refFlat_CC2D2A:range=chr4:1547…	NA	inner
CUST_46278_PI429285431	0.00492734	2.5447	lncRNA	ncbi	>gi|337298457|ref|NR_038970.1| Homo sapiens long intergenic non-protein coding RNA 641 (LINC00641), transcript variant 1, non-coding RNA	Chr14	21668238	21671237	-	NA	hg19_refFlat_CYB561D1:range=chr1:110036762-1100384895'pad=0,hg19_refFlat_CYB561D1:range=chr1:110036762-1100384895'pad=0 3'pad=0 strand=+ repeatMasking=none,-77.30;hg19_refFlat_FBLIM1:range=chr1:16091479-161015265'pad=0,hg19_refFlat_FBLIM1:range=chr1:16091479-161015265'pad=0 3'pad=0 strand=+ repeatMasking=none,-87.60;hg19_refFlat_JAM2:range=chr21:27012134-270866175'pad=0,hg19_refFlat_JAM2:range=ch…	NA	inter
LNCA_19_P00320992	0.0452344	2.54335	lncRNA	Agilent_HUMAN_G3V2	XR_132521	chr6	2412767	2412826	+	NA	NA	NA	Unknown
CUST_48199_PI429285431	0.0146581	2.54298	lncRNA	ncbi	>gi|397138578|ref|XR_159534.1| PREDICTED: Homo sapiens inositol hexakisphosphate and diphosphoinositol-pentakisphosphate kinase 1-like (LOC100508782), misc_RNA	NA	NA	NA	NA	NA	NA	NA	Unknown
CUST_23191_PI429285431	0.0315406	2.54029	lncRNA	lncipedia2.1	>lnc-C17orf97-3:4	chr17	182847	183349	+	RPH3AL	NA	chr17:172847-193235	inner
CUST_49966_PI429285431	0.0492778	2.53829	lncRNA	UCSC	>hg19_lincRNAsTranscripts_TCONS_l2_00026263 range=chr7:149244153-149250817 5'pad=0 3'pad=0 strand=+ repeatMasking=none	chr7	149247153	149250117	+	NA	hg19_refFlat_SUGT1:range=chr13:53227056-532619705'pad=0,hg19_refFlat_SUGT1:range=chr13:53227056-532619705'pad=0 3'pad=0 strand=+ repeatMasking=none,-72.70	NA	inter
CUST_16195_PI429285431	0.0360101	2.53279	lncRNA	lncipedia2.1	>lnc-ACTR3-1:2	chr2	114740241	114741395	+	NA	NA	NA	inter
CUST_48277_PI429285431	0.0106581	2.532	lncRNA	UCSC	>hg19_lincRNAsTranscripts_TCONS_l2_00001046 range=chr1:16944759-16971194 5'pad=0 3'pad=0 strand=- repeatMasking=none	chr1	16944759	16947066	-	NBPF1	NA	chr1:16934759-16939982	inter
CUST_50670_PI429285431	0.0166457	2.52851	lncRNA	UCSC	>hg19_lincRNAsTranscripts_TCONS_l2_00003012 range=chr10:43979980-44021239 5'pad=0 3'pad=0 strand=+ repeatMasking=none	chr10	43979980	43982979	+	NA	hg19_refFlat_SLC4A8:range=chr12:51844689-518740065'pad=0,hg19_refFlat_SLC4A8:range=chr12:51844689-518740065'pad=0 3'pad=0 strand=+ repeatMasking=none,-82.90;hg19_refFlat_PDLIM5:range=chr4:95376440-953777095'pad=0,hg19_refFlat_PDLIM5:range=chr4:95376440-953777095'pad=0 3'pad=0 strand=+ repeatMasking=none,-79.90;hg19_refFlat_ZNF91:range=chr19:23542205-235781565'pad=0,hg19_refFlat_ZNF91:range=chr19:…	NA	inter
CUST_43699_PI429285431	0.0205143	2.5281	lncRNA	ncbi	>gi|375268764|ref|NR_046326.1| Homo sapiens KDM5B antisense RNA 1 (head to head) (KDM5B-AS1), transcript variant 2, non-coding RNA	Chr1	202780074	202780723	+	NA	NA	NA	inter
CUST_10016_PI429285431	0.0256625	2.51758	lncRNA	lncipedia2.1	>lnc-RASA1-3:8	chr5	87565285	87566323	+	TMEM161B	NA	chr5:87555285-87564665	inter
CUST_25340_PI429285431	0.0313694	2.51676	lncRNA	lncipedia2.1	>lnc-STAT1-2:1	chr2	191746639	191747557	-	GLS	hg19_refFlat_GLS:range=chr2:191745811-1918277125'pad=0,hg19_refFlat_GLS:range=chr2:191745811-1918277125'pad=0 3'pad=0 strand=+ repeatMasking=none,-113.40;hg19_refFlat_GLS:range=chr2:191745811-1917975885'pad=0,hg19_refFlat_GLS:range=chr2:191745811-1917975885'pad=0 3'pad=0 strand=+ repeatMasking=none,-113.40chr2:191745547-191756785	NA	inner
CUST_49673_PI429285431	0.0380124	2.51579	lncRNA	UCSC	>hg19_lincRNAsTranscripts_TCONS_l2_00026959 range=chr7:149244300-149321991 5'pad=0 3'pad=0 strand=- repeatMasking=none	chr7	149244300	149246729	-	NA	NA	NA	inter
CUST_48276_PI429285431	0.00500128	2.51521	lncRNA	UCSC	>hg19_lincRNAsTranscripts_TCONS_l2_00001045 range=chr1:16944758-16961667 5'pad=0 3'pad=0 strand=- repeatMasking=none	chr1	16944758	16947103	-	NBPF1	hg19_refFlat_TUBGCP2:range=chr10:135093270-1351164455'pad=0,hg19_refFlat_TUBGCP2:range=chr10:135093270-1351164455'pad=0 3'pad=0 strand=- repeatMasking=none,-70.20;hg19_refFlat_HSD11B1L:range=chr19:5684044-56879565'pad=0,hg19_refFlat_HSD11B1L:range=chr19:5684044-56879565'pad=0 3'pad=0 strand=+ repeatMasking=none,-82.20;hg19_refFlat_BRD2:range=chr6_mann_hap4:4397903-44057165'pad=0,hg19_refFlat_BRD2…	NA	inter
LNCA_21_P0005166	0.0327609	2.51475	lncRNA	Agilent_HUMAN_G3V2	TCONS_00012732	chr6	45523639	45523698	-	NA	NA	NA	Unknown
CUST_26907_PI429285431	0.0243367	2.50784	lncRNA	NONCODERv3	>n323983|NULL|mRNAlikelncRNA|Homosapiens|vegalncRNA|GENCODE|OTTHUMT00000053807|http://vega.sanger.ac.uk/Homo_sapiens/Transcript/Summary?db=core;t=OTTHUMT00000053807|-0.9774480|-0.3407561	chr9	119450704	119452002	+	ASTN2	NA	chr9:119440704-119469126	inner
CUST_22052_PI429285431	0.0142992	2.50498	lncRNA	lncipedia2.1	>lnc-C1orf186-1:2	chr1	206306069	206306583	-	NA	NA	NA	inter
CUST_21403_PI429285431	0.0101744	2.50457	lncRNA	lncipedia2.1	>lnc-ZAP70-2:5	chr2	98319132	98319668	+	NA	hg19_refFlat_TCF4:range=chr18:52895456-533031285'pad=0,hg19_refFlat_TCF4:range=chr18:52895456-533031285'pad=0 3'pad=0 strand=- repeatMasking=none,-77.50;hg19_refFlat_CYB561D1:range=chr1:110036762-1100383975'pad=0,hg19_refFlat_CYB561D1:range=chr1:110036762-1100383975'pad=0 3'pad=0 strand=+ repeatMasking=none,-81.20;hg19_refFlat_SEPP1:range=chr5:42800822-428108695'pad=0,hg19_refFlat_SEPP1:range=chr…	NA	inter
CUST_15050_PI429285431	0.0385182	2.50304	lncRNA	lncipedia2.1	>lnc-RASA1-3:21	chr5	87588385	87588772	+	NA	NA	NA	inter
CUST_1637_PI429285431	0.000201036	2.50277	lncRNA	gencode_v17	>transcript_id "ENST00000597482.1" | genecode_v17	chr3	195414692	195416167	+	NA	NA	NA	inter
CUST_47855_PI429285431	0.0421162	2.50173	lncRNA	ncbi	>gi|410171123|ref|XR_171156.1| PREDICTED: Homo sapiens rootletin-like (LOC101060339), misc_RNA	NA	NA	NA	NA	NA	NA	NA	Unknown
CUST_26491_PI429285431	0.0177121	2.50137	lncRNA	lncipedia2.1	>lnc-C1orf186-1:3	chr1	206289367	206289658	-	NA	NA	NA	inter
CUST_49671_PI429285431	0.0332322	2.50009	lncRNA	UCSC	>hg19_lincRNAsTranscripts_TCONS_l2_00026949 range=chr7:149244256-149321776 5'pad=0 3'pad=0 strand=- repeatMasking=none	chr7	149244256	149246666	-	NA	NA	NA	inter
LNCA_21_P0014689	0.0229592	2.49932	lncRNA	Agilent_HUMAN_G3V2	ENST00000423323	chr17	13679956	13680015	-	NA	NA	NA	Unknown
LNCA_21_P0004136	0.00950894	2.49302	lncRNA	Agilent_HUMAN_G3V2	ENST00000515199	chr5	67829254	67829313	-	NA	NA	NA	Unknown
CUST_21563_PI429285431	0.0158551	2.4917	lncRNA	lncipedia2.1	>lnc-HADH-1:4	chr4	109120978	109121436	+	NA	NA	NA	inter
CUST_30675_PI429285431	0.0469514	2.49128	lncRNA	NONCODERv3	>n336147|X92036|mRNAlikelncRNA|Homosapiens|NULL|H-invitationalv7.5|HIT000324514|http://h-invitational.jp/hinv/spsoup/transcript_view?hit_id=HIT000324514|-1.0500500|-0.2079975	chr14	22466241	22466493	+	NA	NA	NA	inter
CUST_13785_PI429285431	0.0474662	2.49095	lncRNA	lncipedia2.1	>lnc-KIAA1755-5:5	chr20	37063670	37064253	-	NA	NA	NA	inter
CUST_49244_PI429285431	0.0288002	2.48883	lncRNA	UCSC	>hg19_lincRNAsTranscripts_TCONS_l2_00022197 range=chr5:10564450-10657959 5'pad=0 3'pad=0 strand=+ repeatMasking=none	chr5	10564450	10567449	+	ANKRD33B	NA	chr5:10564435-10657928	inner
LNCA_21_P0014800	0.0154277	2.48785	lncRNA	Agilent_HUMAN_G3V2	XR_132604	chr16	3105001	3105763	-	NA	NA	NA	Unknown
CUST_10608_PI429285431	0.014864	2.48763	lncRNA	lncipedia2.1	>lnc-ABT1-3:2	chr6	26680880	26682494	+	NA	NA	NA	inter
CUST_49670_PI429285431	0.0373777	2.48544	lncRNA	UCSC	>hg19_lincRNAsTranscripts_TCONS_l2_00026948 range=chr7:149244253-149317115 5'pad=0 3'pad=0 strand=- repeatMasking=none	chr7	149244253	149245849	-	NA	NA	NA	inter
CUST_39352_PI429285431	0.0493364	2.48077	lncRNA	NONCODERv3	>n386440|NULL|lncRNA|Homosapiens||UCSCGeneNoncode|uc010lal.1||1.1334400|-0.1965963	chr7	72333317	72336316	-	NA	hg19_refFlat_ISY1:range=chr3:128848924-1288798185'pad=0,hg19_refFlat_ISY1:range=chr3:128848924-1288798185'pad=0 3'pad=0 strand=- repeatMasking=none,-82.80;hg19_refFlat_MRPL10:range=chr17:45901571-459065865'pad=0,hg19_refFlat_MRPL10:range=chr17:45901571-459065865'pad=0 3'pad=0 strand=- repeatMasking=none,-72.00;hg19_refFlat_BRD2:range=chr6_cox_hap2:4385214-43930395'pad=0,hg19_refFlat_BRD2:range=ch…	NA	inter
CUST_25076_PI429285431	0.0194172	2.48044	lncRNA	lncipedia2.1	>lnc-C9orf38-1:1	chr9	6449340	6449977	-	UHRF2	NA	chr9:6439340-6459558	inter
LNCA_21_P0004025	0.025287	2.48029	lncRNA	Agilent_HUMAN_G3V2	TCONS_00009445	chr5	87566164	87566223	+	NA	NA	NA	Unknown
CUST_39465_PI429285431	0.0113203	2.47984	lncRNA	NONCODERv3	>n387024|NULL|lncRNA|Homosapiens||UCSCGeneNoncode|uc010wkn.1||0.0522884|-0.2318717	chr17	45129891	45131987	-	NA	hg19_refFlat_LRRC37A:range=chr17:44372500-444150895'pad=0,hg19_refFlat_LRRC37A:range=chr17:44372500-444150895'pad=0 3'pad=0 strand=+ repeatMasking=none,-83.30;hg19_refFlat_LRRC37A:range=chr17_ctg5_hap1:415695-4586015'pad=0,hg19_refFlat_LRRC37A:range=chr17_ctg5_hap1:415695-4586015'pad=0 3'pad=0 strand=- repeatMasking=none,-83.30;hg19_refFlat_LRRC37A2:range=chr17:44590079-446329455'pad=0,hg19_refFl…	NA	inter
CUST_32019_PI429285431	0.0392302	2.47966	lncRNA	NONCODERv3	>n338584|AK092600|mRNAlikelncRNA|Homosapiens|HumanlncRNA|JounralRNA|990|NULL|-0.8846430|-0.2838873	chr13	20241348	20244347	-	PSPC1	hg19_refFlat_CSF2RA:range=chrX:1401597-14283725'pad=0,hg19_refFlat_CSF2RA:range=chrX:1401597-14283725'pad=0 3'pad=0 strand=+ repeatMasking=none,-73.10;hg19_refFlat_C9orf37:range=chr9:140510121-1405106515'pad=0,hg19_refFlat_C9orf37:range=chr9:140510121-1405106515'pad=0 3'pad=0 strand=- repeatMasking=none,-76.80;hg19_refFlat_C14orf178:range=chr14:78235743-782360215'pad=0,hg19_refFlat_C14orf178:rang…	NA	inner
LNCA_21_P0013455	0.0423302	2.47914	lncRNA	Agilent_HUMAN_G3V2	ENST00000481762	chr7	149260628	149260687	-	NA	NA	NA	Unknown
CUST_51454_PI429285431	0.0286658	2.47763	lncRNA	UCSC	>hg19_lincRNAsTranscripts_TCONS_l2_00009686 range=chr16:32772061-32773365 5'pad=0 3'pad=0 strand=+ repeatMasking=none	chr16	32772061	32772546	+	NA	NA	NA	inter
CUST_41025_PI429285431	0.0337234	2.4747	lncRNA	NONCODERv3	>n411650|NR_040113|lncRNA|Homosapiens||RefGeneNoncode|NR_040113||5.5985600|-0.3554412	chr18	14182095	14182801	+	LOC100652806	NA	chr18:14234721-14237049	inter
CUST_10810_PI429285431	0.0299584	2.47372	lncRNA	lncipedia2.1	>lnc-ABT1-3:6	chr6	26687347	26688827	+	NA	hg19_refFlat_PRR16:range=chr5:119816899-1200224045'pad=0,hg19_refFlat_PRR16:range=chr5:119816899-1200224045'pad=0 3'pad=0 strand=+ repeatMasking=none,-67.30;hg19_refFlat_TCEANC:range=chrX:13677806-136816835'pad=0,hg19_refFlat_TCEANC:range=chrX:13677806-136816835'pad=0 3'pad=0 strand=+ repeatMasking=none,-70.50;hg19_refFlat_UBE2J2:range=chr1:1190583-12033725'pad=0,hg19_refFlat_UBE2J2:range=chr1:11…	NA	inter
CUST_23561_PI429285431	0.0411259	2.46827	lncRNA	lncipedia2.1	>lnc-MTA2-1:1	chr11	62357864	62358557	-	TUT1	hg19_refFlat_CAGE1:range=chr6:7329398-73874065'pad=0,hg19_refFlat_CAGE1:range=chr6:7329398-73874065'pad=0 3'pad=0 strand=- repeatMasking=none,-85.80;hg19_refFlat_ZNF829:range=chr19:37382394-374068565'pad=0,hg19_refFlat_ZNF829:range=chr19:37382394-374068565'pad=0 3'pad=0 strand=- repeatMasking=none,-73.10;hg19_refFlat_NANOGNB:range=chr12:7917882-79264475'pad=0,hg19_refFlat_NANOGNB:range=chr12:7917…	NA	inner
CUST_23996_PI429285431	0.020428	2.46782	lncRNA	lncipedia2.1	>lnc-TRRAP-1:1	chr7	98636040	98636437	+	SMURF1	hg19_refFlat_FAM193A:range=chr4:2632732-27217615'pad=0,hg19_refFlat_FAM193A:range=chr4:2632732-27217615'pad=0 3'pad=0 strand=+ repeatMasking=none,-69.40;hg19_refFlat_PPIP5K1:range=chr15:43826872-438767025'pad=0,hg19_refFlat_PPIP5K1:range=chr15:43826872-438767025'pad=0 3'pad=0 strand=- repeatMasking=none,-45.90;hg19_refFlat_SGCE:range=chr7:94214811-942854105'pad=0,hg19_refFlat_SGCE:range=chr7:9421…	NA	inner
LNCA_21_P0012485	0.0167799	2.46545	lncRNA	Agilent_HUMAN_G3V2	TCONS_l2_00019714	chr3	197319997	197330425	-	NA	NA	NA	Unknown
CUST_22954_PI429285431	0.0458554	2.46191	lncRNA	lncipedia2.1	>lnc-SP110-1:2	chr2	231444616	231445078	-	NA	NA	NA	inter
CUST_18071_PI429285431	0.0215312	2.46098	lncRNA	lncipedia2.1	>lnc-TMEM116-2:5	chr12	112279131	112280066	-	MAPKAPK5	NA	chr12:112280279-112289765	inter
CUST_21141_PI429285431	0.0385798	2.45665	lncRNA	lncipedia2.1	>lnc-STARD4-1:1	chr5	110637909	110638473	-	CAMK4	NA	chr5:110627909-110648265	inner
CUST_1946_PI429285431	0.00821871	2.45649	lncRNA	gencode_v17	>transcript_id "ENST00000507949.1" | genecode_v17	chr4	152840620	152841107	+	NA	NA	NA	inter
CUST_40960_PI429285431	0.040862	2.45605	lncRNA	NONCODERv3	>n410985|NR_038447|lncRNA|Homosapiens||RefGeneNoncode|NR_038447||1.5360700|-0.2983268	chr8	126934766	126935418	-	NA	NA	NA	inter
CUST_7550_PI429285431	0.0269556	2.45208	lncRNA	lncipedia2.1	>lnc-PTCH1-3:6	chr9	98637262	98637551	-	C9orf102	NA	chr9:98637900-98647352	inter
CUST_22359_PI429285431	0.0336351	2.45039	lncRNA	lncipedia2.1	>lnc-CACYBP-1:1	chr1	174866914	174867650	+	RABGAP1L	hg19_refFlat_BRD2:range=chr6_mcf_hap5:4277541-42838425'pad=0,hg19_refFlat_BRD2:range=chr6_mcf_hap5:4277541-42838425'pad=0 3'pad=0 strand=+ repeatMasking=none,-75.00;hg19_refFlat_BRD2:range=chr6_ssto_hap7:4421448-44292735'pad=0,hg19_refFlat_BRD2:range=chr6_ssto_hap7:4421448-44292735'pad=0 3'pad=0 strand=+ repeatMasking=none,-75.20;hg19_refFlat_MAP4K1:range=chr19:39078450-391085355'pad=0,hg19_refFl…	NA	inner
LNCA_21_P0010849	0.0418012	2.44885	lncRNA	Agilent_HUMAN_G3V2	AK098032	chr10	135464806	135464865	+	NA	NA	NA	Unknown
CUST_25587_PI429285431	0.00445848	2.44878	lncRNA	lncipedia2.1	>lnc-AC012652.1.1-1:13	chr15	41580181	41581032	+	CHP	hg19_refFlat_ZNF429:range=chr19:21688574-217208805'pad=0,hg19_refFlat_ZNF429:range=chr19:21688574-217208805'pad=0 3'pad=0 strand=+ repeatMasking=none,-82.20;hg19_refFlat_ZNF714:range=chr19:21281075-213011355'pad=0,hg19_refFlat_ZNF714:range=chr19:21281075-213011355'pad=0 3'pad=0 strand=+ repeatMasking=none,-70.70chr15:41570181-41574085	NA	inter
CUST_18252_PI429285431	0.0435035	2.44878	lncRNA	lncipedia2.1	>lnc-RNF39-4:2	chr6	30028518	30030223	-	ZNRD1	NA	chr6:30029036-30032686	inter
CUST_44347_PI429285431	0.0108233	2.4487	lncRNA	ncbi	>gi|323641476|ref|NR_037888.1| Homo sapiens uncharacterized LOC100507266 (LOC100507266), non-coding RNA	Chr4	4543858	4546338	+	NA	NA	NA	inter
CUST_44640_PI429285431	0.0359655	2.44797	lncRNA	ncbi	>gi|397139115|ref|XR_158999.1| PREDICTED: Homo sapiens uncharacterized LOC100507427 (LOC100507427), misc_RNA	NA	NA	NA	NA	NA	NA	NA	Unknown
CUST_47319_PI429285431	0.0290978	2.44556	lncRNA	ncbi	>gi|307574675|ref|NR_036633.1| Homo sapiens VAMP (vesicle-associated membrane protein)-associated protein B and C (VAPB), transcript variant 3, non-coding RNA	Chr20	56967175	56970174	+	NA	NA	NA	inter
CUST_14307_PI429285431	0.00176715	2.44449	lncRNA	lncipedia2.1	>lnc-HS3ST3A1-4:4	chr17	13685836	13686402	-	NA	hg19_refFlat_ARHGAP8:range=chr22:45182408-452584755'pad=0,hg19_refFlat_ARHGAP8:range=chr22:45182408-452584755'pad=0 3'pad=0 strand=+ repeatMasking=none,-69.90;hg19_refFlat_TTC22:range=chr1:55251219-552668365'pad=0,hg19_refFlat_TTC22:range=chr1:55251219-552668365'pad=0 3'pad=0 strand=- repeatMasking=none,-70.90;hg19_refFlat_C22orf26:range=chr22:46447707-464499735'pad=0,hg19_refFlat_C22orf26:range=…	NA	inter
LNCA_21_P0008255	0.00303059	2.44434	lncRNA	Agilent_HUMAN_G3V2	TCONS_00022278	chr13	48510594	48510653	-	NA	NA	NA	Unknown
LNCA_21_P0011698	0.045404	2.44198	lncRNA	Agilent_HUMAN_G3V2	TCONS_l2_00012523	chr19	37759086	37759145	+	NA	NA	NA	Unknown
CUST_36736_PI429285431	0.0138882	2.44195	lncRNA	NONCODERv3	>n345219|NULL|lincRNA|Homosapiens|HumanlincRNA|ScriptureReconstructionLincRNAsByLuo[unpublished]|linc_luo_768|NULL|-1.3300000|-0.3283629	chr13	41025067	41028066	-	NA	NA	NA	inter
CUST_5132_PI429285431	0.0262819	2.44019	lncRNA	gencode_v17	>transcript_id "ENST00000564670.1" | genecode_v17	chr15	32828248	32828790	+	LOC643699	NA	chr15:32885755-32889814	inter
LNCA_21_P0001196	0.035412	2.43989	lncRNA	Agilent_HUMAN_G3V2	ENST00000421851	chr1	173978405	173978464	-	NA	NA	NA	Unknown
CUST_8106_PI429285431	0.0404535	2.43943	lncRNA	lncipedia2.1	>lnc-USP8-2:8	chr15	50662561	50663184	+	NA	hg19_refFlat_C8orf44:range=chr8:67589944-675921895'pad=0,hg19_refFlat_C8orf44:range=chr8:67589944-675921895'pad=0 3'pad=0 strand=+ repeatMasking=none,-80.90;hg19_refFlat_SGCE:range=chr7:94214811-942854105'pad=0,hg19_refFlat_SGCE:range=chr7:94214811-942854105'pad=0 3'pad=0 strand=- repeatMasking=none,-70.30;hg19_refFlat_USP4:range=chr3:49349800-493774575'pad=0,hg19_refFlat_USP4:range=chr3:49349800…	NA	inter
CUST_25392_PI429285431	0.0389467	2.43621	lncRNA	lncipedia2.1	>lnc-RBM48-1:3	chr7	92546151	92546556	+	NA	NA	NA	inter
CUST_35597_PI429285431	0.027733	2.43558	lncRNA	NONCODERv3	>n342736|AK055123|mRNAlikelncRNA|Homosapiens|HumanlncRNA|JounralRNA|5239|NULL|-1.1628900|-0.2840120	chr6	29979874	29981988	-	NA	NA	NA	inter
CUST_48279_PI429285431	0.00477445	2.43303	lncRNA	UCSC	>hg19_lincRNAsTranscripts_TCONS_l2_00001048 range=chr1:16944761-16949738 5'pad=0 3'pad=0 strand=- repeatMasking=none	chr1	16944761	16947076	-	NBPF1	hg19_refFlat_CYB561D1:range=chr1:110036762-1100383975'pad=0,hg19_refFlat_CYB561D1:range=chr1:110036762-1100383975'pad=0 3'pad=0 strand=+ repeatMasking=none,-81.40;hg19_refFlat_PKP2:range=chr12:32945358-330496655'pad=0,hg19_refFlat_PKP2:range=chr12:32945358-330496655'pad=0 3'pad=0 strand=- repeatMasking=none,-86.20;hg19_refFlat_CYB561D1:range=chr1:110036762-1100388815'pad=0,hg19_refFlat_CYB561D1:r…	NA	inter
CUST_38089_PI429285431	0.0425767	2.43092	lncRNA	NONCODERv3	>n381084|NULL|lncRNA|Homosapiens||UCSCGeneNoncode|uc001bhj.3||1.0231900|-0.1452564	chr1	23953225	23954849	+	NA	hg19_refFlat_ST6GAL2:range=chr2:107429598-1074604335'pad=0,hg19_refFlat_ST6GAL2:range=chr2:107429598-1074604335'pad=0 3'pad=0 strand=- repeatMasking=none,-79.40;hg19_refFlat_FBLIM1:range=chr1:16091479-161015265'pad=0,hg19_refFlat_FBLIM1:range=chr1:16091479-161015265'pad=0 3'pad=0 strand=+ repeatMasking=none,-88.70;hg19_refFlat_PKP2:range=chr12:32945358-330496655'pad=0,hg19_refFlat_PKP2:range=chr1…	NA	inter
LNCA_21_P0004390	0.0167924	2.43009	lncRNA	Agilent_HUMAN_G3V2	TCONS_00010338	chr5	54913951	54915263	-	NA	NA	NA	Unknown
CUST_49676_PI429285431	0.0494916	2.427	lncRNA	UCSC	>hg19_lincRNAsTranscripts_TCONS_l2_00026960 range=chr7:149244462-149321836 5'pad=0 3'pad=0 strand=- repeatMasking=none	chr7	149247462	149247832	-	NA	NA	NA	inter
CUST_40786_PI429285431	0.0120915	2.42663	lncRNA	NONCODERv3	>n410541|NR_037705|lncRNA|Homosapiens||RefGeneNoncode|NR_037705||7.8361200|-0.2412502	chr16	89284110	89287109	+	ZNF778	NA	chr16:89284111-89295965	inter
CUST_24911_PI429285431	0.00735892	2.42595	lncRNA	lncipedia2.1	>lnc-SLC2A6-1:1	chr9	136335764	136336192	-	C9orf7	NA	chr9:136325764-136335909	inner
CUST_29860_PI429285431	0.0055489	2.42583	lncRNA	NONCODERv3	>n333782|L17326|mRNAlikelncRNA|Homosapiens|NULL|H-invitationalv7.5|HIT000192305|http://h-invitational.jp/hinv/spsoup/transcript_view?hit_id=HIT000192305|-0.9243720|-0.2088428	chr3	50277151	50277415	+	GNAI2	NA	chr3:50273647-50287416	inner
CUST_23447_PI429285431	0.043197	2.42317	lncRNA	lncipedia2.1	>lnc-AC005838.1-2:1	chr17	15443380	15444080	-	FAM18B2	hg19_refFlat_RGS3:range=chr9:116222537-1163592335'pad=0,hg19_refFlat_RGS3:range=chr9:116222537-1163592335'pad=0 3'pad=0 strand=+ repeatMasking=none,-76.80;hg19_refFlat_ST6GAL2:range=chr2:107429598-1074604335'pad=0,hg19_refFlat_ST6GAL2:range=chr2:107429598-1074604335'pad=0 3'pad=0 strand=- repeatMasking=none,-84.20;hg19_refFlat_ZNF91:range=chr19:23542205-235781565'pad=0,hg19_refFlat_ZNF91:range=ch…	NA	inner
CUST_26641_PI429285431	0.0128472	2.42281	lncRNA	lncipedia2.1	>lnc-C4orf42-1:4	chr4	1247047	1249698	+	CTBP1	hg19_refFlat_CYB561D1:range=chr1:110036762-1100383975'pad=0,hg19_refFlat_CYB561D1:range=chr1:110036762-1100383975'pad=0 3'pad=0 strand=+ repeatMasking=none,-77.40;hg19_refFlat_ADAMTS2:range=chr5:178578130-1787723295'pad=0,hg19_refFlat_ADAMTS2:range=chr5:178578130-1787723295'pad=0 3'pad=0 strand=- repeatMasking=none,-82.50;hg19_refFlat_SEPP1:range=chr5:42800822-428108695'pad=0,hg19_refFlat_SEPP1:r…	NA	inter
CUST_28661_PI429285431	0.0161383	2.4226	lncRNA	NONCODERv3	>n326040|NULL|mRNAlikelncRNA|Homosapiens|vegalncRNA|GENCODE|OTTHUMT00000047272|http://vega.sanger.ac.uk/Homo_sapiens/Transcript/Summary?db=core;t=OTTHUMT00000047272|0.2264460|-0.4497328	chr10	26976920	26978139	+	PDSS1	hg19_refFlat_CYB561D1:range=chr1:110036762-1100383975'pad=0,hg19_refFlat_CYB561D1:range=chr1:110036762-1100383975'pad=0 3'pad=0 strand=+ repeatMasking=none,-81.40;hg19_refFlat_ZNF429:range=chr19:21688574-217208805'pad=0,hg19_refFlat_ZNF429:range=chr19:21688574-217208805'pad=0 3'pad=0 strand=+ repeatMasking=none,-86.70;hg19_refFlat_CYB561D1:range=chr1:110036762-1100384895'pad=0,hg19_refFlat_CYB561…	NA	inter
CUST_23808_PI429285431	0.00102073	2.41907	lncRNA	lncipedia2.1	>lnc-RNASET2-1:1	chr6	167412406	167412790	-	FGFR1OP	NA	chr6:167412816-167422553	inter
CUST_8159_PI429285431	0.0184806	2.41872	lncRNA	lncipedia2.1	>lnc-WRNIP1-2:5	chr6	2398811	2399439	+	NA	NA	NA	inter
CUST_48275_PI429285431	0.00602398	2.41865	lncRNA	UCSC	>hg19_lincRNAsTranscripts_TCONS_l2_00001042 range=chr1:16944753-16959154 5'pad=0 3'pad=0 strand=- repeatMasking=none	chr1	16944753	16947144	-	NBPF1	NA	chr1:16934753-16939982	inter
LNCA_21_P0007841	0.0131391	2.41824	lncRNA	Agilent_HUMAN_G3V2	ENST00000548779	chr12	75644750	75644809	+	NA	NA	NA	Unknown
CUST_12479_PI429285431	0.0128556	2.41637	lncRNA	lncipedia2.1	>lnc-CHMP4C-3:1	chr8	82761226	82761963	+	SNX16	NA	chr8:82751226-82754521	inter
CUST_31450_PI429285431	0.0117792	2.416	lncRNA	NONCODERv3	>n337919|BC032417|mRNAlikelncRNA|Homosapiens|HumanlncRNA|JounralRNA|303|NULL|-0.8655970|-0.2082958	chr1	48693559	48695319	-	SLC5A9	hg19_refFlat_SLC5A9:range=chr1:48688409-487132155'pad=0,hg19_refFlat_SLC5A9:range=chr1:48688409-487132155'pad=0 3'pad=0 strand=+ repeatMasking=none,-95.60chr1:48688357-48705233	NA	inner
CUST_39781_PI429285431	0.0195678	2.41539	lncRNA	NONCODERv3	>n406099|NR_003366|lncRNA|Homosapiens||RefGeneNoncode|NR_003366||10.3075000|-0.2313750	chr2	95429672	95430341	-	NA	NA	NA	inter
CUST_37641_PI429285431	0.0177675	2.41183	lncRNA	NONCODERv3	>n346119|NULL|lincRNA|Homosapiens|HumanlincRNA|ScriptureReconstructionLincRNAsByLuo[unpublished]|linc_luo_1669|NULL|-1.5271600|-0.1018072	chr3	195704070	195704966	-	NA	NA	NA	inter
CUST_28955_PI429285431	0.0194534	2.41092	lncRNA	NONCODERv3	>n326384|NULL|mRNAlikelncRNA|Homosapiens|vegalncRNA|GENCODE|OTTHUMT00000099634|http://vega.sanger.ac.uk/Homo_sapiens/Transcript/Summary?db=core;t=OTTHUMT00000099634|-1.0039900|-0.2566309	chr1	147572533	147573069	-	NBPF24	NA	chr1:147562533-147589700	inter
CUST_1676_PI429285431	0.0440456	2.4103	lncRNA	gencode_v17	>transcript_id "ENST00000605571.1" | genecode_v17	chr4	1714548	1715349	+	SLBP	NA	chr4:1704548-1714030	inter
CUST_38755_PI429285431	0.0262562	2.40832	lncRNA	NONCODERv3	>n384321|NULL|lncRNA|Homosapiens||UCSCGeneNoncode|uc003emd.1||0.4138360|-0.2470358	chr3	129109997	129112832	-	C3orf25	hg19_refFlat_SEPP1:range=chr5:42800822-428108695'pad=0,hg19_refFlat_SEPP1:range=chr5:42800822-428108695'pad=0 3'pad=0 strand=- repeatMasking=none,-79.70;hg19_refFlat_NANOGNB:range=chr12:7917882-79264475'pad=0,hg19_refFlat_NANOGNB:range=chr12:7917882-79264475'pad=0 3'pad=0 strand=+ repeatMasking=none,-86.20;hg19_refFlat_CAGE1:range=chr6:7329398-73874065'pad=0,hg19_refFlat_CAGE1:range=chr6:7329398-…	NA	inter
CUST_19185_PI429285431	0.0295058	2.40617	lncRNA	lncipedia2.1	>lnc-CTD-2054N24.2.1-1:1	chr15	100513831	100514402	+	ADAMTS17	NA	chr15:100511643-100524215	inner
CUST_22890_PI429285431	0.00432513	2.40473	lncRNA	lncipedia2.1	>lnc-POLR3E-2:1	chr16	22386180	22387594	+	CDR2	hg19_refFlat_PPIL3:range=chr2:201736118-2017523385'pad=0,hg19_refFlat_PPIL3:range=chr2:201736118-2017523385'pad=0 3'pad=0 strand=- repeatMasking=none,-83.80;hg19_refFlat_BRD2:range=chr6_qbl_hap6:4172820-41806325'pad=0,hg19_refFlat_BRD2:range=chr6_qbl_hap6:4172820-41806325'pad=0 3'pad=0 strand=+ repeatMasking=none,-84.30;hg19_refFlat_CSF2RA:range=chrY:1351597-13783725'pad=0,hg19_refFlat_CSF2RA:ran…	NA	inter
CUST_34167_PI429285431	0.0104659	2.40389	lncRNA	NONCODERv3	>n341012|AK026283|mRNAlikelncRNA|Homosapiens|HumanlncRNA|JounralRNA|3478|NULL|-1.1739400|-0.3127231	chr11	36399073	36400769	+	PRR5L	NA	chr11:36389073-36410759	inner
CUST_49077_PI429285431	0.0139723	2.40278	lncRNA	UCSC	>hg19_lincRNAsTranscripts_TCONS_l2_00020391 range=chr4:6676004-6678711 5'pad=0 3'pad=0 strand=+ repeatMasking=none	chr4	6676004	6678356	+	NA	hg19_refFlat_MYL10:range=chr7:101256755-1012723985'pad=0,hg19_refFlat_MYL10:range=chr7:101256755-1012723985'pad=0 3'pad=0 strand=- repeatMasking=none,-78.70;hg19_refFlat_CEACAM1:range=chr19:43013261-430325265'pad=0,hg19_refFlat_CEACAM1:range=chr19:43013261-430325265'pad=0 3'pad=0 strand=- repeatMasking=none,-43.10;hg19_refFlat_SULT1C2:range=chr2:108910124-1089249205'pad=0,hg19_refFlat_SULT1C2:ran…	NA	inter
CUST_37246_PI429285431	0.0266704	2.39982	lncRNA	NONCODERv3	>n345677|NULL|lincRNA|Homosapiens|HumanlincRNA|ScriptureReconstructionLincRNAsByLuo[unpublished]|linc_luo_1226|NULL|-1.3145300|-0.2776231	chr18	14250368	14250644	+	LOC100652806	NA	chr18:14240368-14249475	inter
LNCA_21_P0010858	0.0222759	2.39687	lncRNA	Agilent_HUMAN_G3V2	TCONS_l2_00003421	chr10	18942637	18942696	-	NA	NA	NA	Unknown
CUST_44274_PI429285431	0.0445044	2.3955	lncRNA	ncbi	>gi|224451008|ref|NR_027038.1| Homo sapiens uncharacterized LOC401093 (LOC401093), transcript variant 1, non-coding RNA	Chr3	151983405	151986404	-	NA	hg19_refFlat_GDPD2:range=chrX:69644835-696529365'pad=0,hg19_refFlat_GDPD2:range=chrX:69644835-696529365'pad=0 3'pad=0 strand=+ repeatMasking=none,-73.50;hg19_refFlat_MYL10:range=chr7:101256755-1012723985'pad=0,hg19_refFlat_MYL10:range=chr7:101256755-1012723985'pad=0 3'pad=0 strand=- repeatMasking=none,-81.80;hg19_refFlat_NUDT7:range=chr16:77756480-777755495'pad=0,hg19_refFlat_NUDT7:range=chr16:77…	NA	inter
CUST_28435_PI429285431	0.0483602	2.39292	lncRNA	NONCODERv3	>n325759|NULL|mRNAlikelncRNA|Homosapiens|vegalncRNA|GENCODE|OTTHUMT00000044595|http://vega.sanger.ac.uk/Homo_sapiens/Transcript/Summary?db=core;t=OTTHUMT00000044595|-1.2218400|-0.3485610	chr13	37525834	37526358	-	ALG5	hg19_refFlat_RQCD1:range=chr2:219433678-2194589995'pad=0,hg19_refFlat_RQCD1:range=chr2:219433678-2194589995'pad=0 3'pad=0 strand=+ repeatMasking=none,-35.50;hg19_refFlat_SGCE:range=chr7:94214811-942854105'pad=0,hg19_refFlat_SGCE:range=chr7:94214811-942854105'pad=0 3'pad=0 strand=- repeatMasking=none,-78.10;hg19_refFlat_NEK5:range=chr13:52639543-527016185'pad=0,hg19_refFlat_NEK5:range=chr13:526395…	NA	inner
CUST_35105_PI429285431	0.0221605	2.39165	lncRNA	NONCODERv3	>n342075|AK026699|mRNAlikelncRNA|Homosapiens|HumanlncRNA|JounralRNA|4556|NULL|-1.1016900|-0.3374355	chr6	83625769	83627692	-	UBE2CBP	NA	chr6:83615769-83637674	inner
CUST_7735_PI429285431	0.020861	2.3878	lncRNA	lncipedia2.1	>lnc-KLRD1-1:1	chr12	10548778	10551607	+	KLRK1	hg19_refFlat_KLRK1:range=chr12:10525713-105414095'pad=0,hg19_refFlat_KLRK1:range=chr12:10525713-105414095'pad=0 3'pad=0 strand=- repeatMasking=none,-80.10;hg19_refFlat_KLRC4-KLRK1:range=chr12:10525713-105414095'pad=0,hg19_refFlat_KLRC4-KLRK1:range=chr12:10525713-105414095'pad=0 3'pad=0 strand=- repeatMasking=none,-80.10;hg19_refFlat_GDPD2:range=chrX:69644835-696529365'pad=0,hg19_refFlat_GDPD2:ran…	NA	inner
CUST_50855_PI429285431	0.00707603	2.38613	lncRNA	UCSC	>hg19_lincRNAsTranscripts_TCONS_l2_00004711 range=chr11:88160044-88161284 5'pad=0 3'pad=0 strand=+ repeatMasking=none	chr11	88160044	88160790	+	NA	NA	NA	inter
CUST_38574_PI429285431	0.0164845	2.38533	lncRNA	NONCODERv3	>n383552|NULL|lncRNA|Homosapiens||UCSCGeneNoncode|uc002qbv.2||1.7524900|-0.1597664	chr19	54001690	54003185	+	ZNF331	hg19_refFlat_AMBRA1:range=chr11:46419000-465699305'pad=0,hg19_refFlat_AMBRA1:range=chr11:46419000-465699305'pad=0 3'pad=0 strand=- repeatMasking=none,-38.00chr19:53999141-54017937	NA	inter
CUST_45536_PI429285431	0.0302858	2.38473	lncRNA	ncbi	>gi|223468642|ref|NR_026795.1| Homo sapiens long intergenic non-protein coding RNA 202 (LINC00202), non-coding RNA	Chr10	27223135	27223784	-	NA	NA	NA	inter
CUST_9218_PI429285431	0.0406654	2.38362	lncRNA	lncipedia2.1	>lnc-PAICS-1:1	chr4	57288780	57290050	+	PPAT	hg19_refFlat_HSD11B1L:range=chr19:5684044-56879565'pad=0,hg19_refFlat_HSD11B1L:range=chr19:5684044-56879565'pad=0 3'pad=0 strand=+ repeatMasking=none,-69.70;hg19_refFlat_CHFR:range=chr12:133418140-1334639145'pad=0,hg19_refFlat_CHFR:range=chr12:133418140-1334639145'pad=0 3'pad=0 strand=- repeatMasking=none,-39.10;hg19_refFlat_CGA:range=chr6:87795474-877979185'pad=0,hg19_refFlat_CGA:range=chr6:8779…	NA	inner
CUST_41840_PI429285431	0.00307156	2.38334	lncRNA	ensembl.GRCh37.72	>ENST00000390127 ncrna:miRNA chromosome:GRCh37:4:130242:130349:1 gene:ENSG00000211553 gene_biotype:miRNA transcript_biotype:miRNA	chr4	130242	130349	+	ZNF718	NA	chr4:124420-140349	inner
CUST_35761_PI429285431	0.00716157	2.38191	lncRNA	NONCODERv3	>n342973|NULL|mRNAlikelncRNA|Homosapiens|ST7OT|lncRNAdb|342973|http://lncrnadb.com/Detail.aspx?TKeyID=204|-1.4375300|-0.2418206	NA	NA	1588	NA	NA	NA	NA	Unknown
CUST_3410_PI429285431	0.0317917	2.38182	lncRNA	gencode_v17	>transcript_id "ENST00000589112.1" | genecode_v17	chr9	42470500	42471267	+	CBWD7	NA	chr9:42478004-42484129	inter
CUST_44902_PI429285431	0.0482511	2.38075	lncRNA	ncbi	>gi|210147393|ref|NR_024278.1| Homo sapiens uncharacterized LOC646762 (LOC646762), non-coding RNA	Chr7	29688538	29691321	-	NA	hg19_refFlat_JAM2:range=chr21:27012134-270866175'pad=0,hg19_refFlat_JAM2:range=chr21:27012134-270866175'pad=0 3'pad=0 strand=+ repeatMasking=none,-73.00;hg19_refFlat_CAGE1:range=chr6:7329398-73874065'pad=0,hg19_refFlat_CAGE1:range=chr6:7329398-73874065'pad=0 3'pad=0 strand=- repeatMasking=none,-82.40;hg19_refFlat_C8orf44:range=chr8:67589944-675921895'pad=0,hg19_refFlat_C8orf44:range=chr8:67589944…	NA	inter
CUST_46574_PI429285431	0.0274503	2.3798	lncRNA	ncbi	>gi|301601675|ref|NR_036442.1| Homo sapiens lipase maturation factor 1 (LMF1), transcript variant 4, non-coding RNA	NA	NA	NA	NA	NA	NA	NA	Unknown
CUST_51322_PI429285431	0.0230432	2.37968	lncRNA	UCSC	>hg19_lincRNAsTranscripts_TCONS_l2_00009062 range=chr15:43991625-43993449 5'pad=0 3'pad=0 strand=- repeatMasking=none	chr15	43991625	43992350	-	CKMT1A	NA	chr15:43985084-43991420	inter
CUST_39358_PI429285431	0.0468008	2.3796	lncRNA	NONCODERv3	>n386452|NULL|lncRNA|Homosapiens||UCSCGeneNoncode|uc010lfq.2||-0.3038580|-0.1952353	chr7	97595943	97596473	+	NA	hg19_refFlat_OR7E24:range=chr19:9361720-93627395'pad=0,hg19_refFlat_OR7E24:range=chr19:9361720-93627395'pad=0 3'pad=0 strand=+ repeatMasking=none,-91.20;hg19_refFlat_LOC650293:range=chr4:8951477-89521275'pad=0,hg19_refFlat_LOC650293:range=chr4:8951477-89521275'pad=0 3'pad=0 strand=+ repeatMasking=none,-85.00	NA	inter
CUST_15887_PI429285431	0.016326	2.37901	lncRNA	lncipedia2.1	>lnc-ABT1-3:1	chr6	26687347	26688499	+	NA	NA	NA	inter
CUST_35211_PI429285431	0.00762022	2.3788	lncRNA	NONCODERv3	>n342197|CR604349|mRNAlikelncRNA|Homosapiens|HumanlncRNA|JounralRNA|4687|NULL|0.0203483|-0.3120706	chr17	37071929	37073089	+	LASP1	hg19_refFlat_ZNF700:range=chr19:12037391-120610685'pad=0,hg19_refFlat_ZNF700:range=chr19:12037391-120610685'pad=0 3'pad=0 strand=+ repeatMasking=none,-85.20;hg19_refFlat_C15orf40:range=chr15:83677162-836803595'pad=0,hg19_refFlat_C15orf40:range=chr15:83677162-836803595'pad=0 3'pad=0 strand=- repeatMasking=none,-81.50;hg19_refFlat_C15orf40:range=chr15:83659385-836803595'pad=0,hg19_refFlat_C15orf40:…	NA	inter
CUST_48281_PI429285431	0.00783448	2.37642	lncRNA	UCSC	>hg19_lincRNAsTranscripts_TCONS_l2_00001049 range=chr1:16944766-16950434 5'pad=0 3'pad=0 strand=- repeatMasking=none	chr1	16947766	16947939	-	NBPF1	hg19_refFlat_NXNL2:range=chr9:91150350-911861075'pad=0,hg19_refFlat_NXNL2:range=chr9:91150350-911861075'pad=0 3'pad=0 strand=+ repeatMasking=none,-89.30;hg19_refFlat_USP4:range=chr3:49349800-493774575'pad=0,hg19_refFlat_USP4:range=chr3:49349800-493774575'pad=0 3'pad=0 strand=- repeatMasking=none,-76.10;hg19_refFlat_WDR27:range=chr6:169857687-1700891015'pad=0,hg19_refFlat_WDR27:range=chr6:16985768…	NA	inter
CUST_35382_PI429285431	0.0245864	2.37619	lncRNA	NONCODERv3	>n342431|AK092980|mRNAlikelncRNA|Homosapiens|HumanlncRNA|JounralRNA|4924|NULL|1.8390300|-0.1846212	chr2	96080755	96082345	+	FAHD2A	NA	chr2:96070755-96078879	inter
CUST_10717_PI429285431	0.0375793	2.37519	lncRNA	lncipedia2.1	>lnc-RASA1-3:14	chr5	87583253	87584588	+	NA	NA	NA	inter
CUST_14548_PI429285431	0.0160135	2.3747	lncRNA	lncipedia2.1	>lnc-ZNF74-1:5	chr22	20852954	20853308	+	KLHL22	NA	chr22:20842954-20850170	inter
CUST_48278_PI429285431	0.0099788	2.37385	lncRNA	UCSC	>hg19_lincRNAsTranscripts_TCONS_l2_00001047 range=chr1:16944760-16961756 5'pad=0 3'pad=0 strand=- repeatMasking=none	chr1	16944760	16947045	-	NBPF1	hg19_refFlat_CNGA1:range=chr4:47938438-479731175'pad=0,hg19_refFlat_CNGA1:range=chr4:47938438-479731175'pad=0 3'pad=0 strand=- repeatMasking=none,-77.70;hg19_refFlat_MRPL10:range=chr17:45901571-459065865'pad=0,hg19_refFlat_MRPL10:range=chr17:45901571-459065865'pad=0 3'pad=0 strand=- repeatMasking=none,-76.70;hg19_refFlat_MAP4K1:range=chr19:39078450-391085355'pad=0,hg19_refFlat_MAP4K1:range=chr19:…	NA	inter
CUST_166_PI429285431	0.0489431	2.36829	lncRNA	gencode_v17	>transcript_id "ENST00000414128.1" | genecode_v17	chr1	17181902	17182783	+	NA	NA	NA	inter
CUST_32198_PI429285431	0.0293816	2.36704	lncRNA	NONCODERv3	>n338774|AF330042|mRNAlikelncRNA|Homosapiens|HumanlncRNA|JounralRNA|1196|NULL|-0.8660470|-0.3507031	chr13	74700602	74702041	-	KLF12	hg19_refFlat_ASCC1:range=chr10:73862127-739730565'pad=0,hg19_refFlat_ASCC1:range=chr10:73862127-739730565'pad=0 3'pad=0 strand=- repeatMasking=none,-80.30chr13:74690602-74708066	NA	inner
CUST_12948_PI429285431	0.0188474	2.36623	lncRNA	lncipedia2.1	>lnc-CRYBA4-1:39	chr22	27113216	27115051	+	NA	NA	NA	inter
CUST_43185_PI429285431	0.025723	2.36611	lncRNA	ensembl.GRCh37.72	>ENST00000592319 havana:sense_intronic chromosome:GRCh37:19:37828138:37828645:1 gene:ENSG00000267682 gene_biotype:sense_intronic transcript_biotype:sense_intronic	chr19	37828138	37828512	+	HKR1	NA	chr19:37825580-37838645	inner
CUST_44633_PI429285431	0.0216647	2.36528	lncRNA	ncbi	>gi|336020380|ref|NR_038402.1| Homo sapiens uncharacterized LOC100507387 (LOC100507387), non-coding RNA	Chr5	175546552	175547556	+	NA	NA	NA	inter
CUST_49672_PI429285431	0.0495703	2.36446	lncRNA	UCSC	>hg19_lincRNAsTranscripts_TCONS_l2_00026951 range=chr7:149244260-149321823 5'pad=0 3'pad=0 strand=- repeatMasking=none	chr7	149244260	149246629	-	NA	NA	NA	inter
CUST_48509_PI429285431	0.0310683	2.36327	lncRNA	UCSC	>hg19_lincRNAsTranscripts_TCONS_l2_00014789 range=chr2:111964785-112252624 5'pad=0 3'pad=0 strand=- repeatMasking=none	chr2	111964785	111966848	-	NA	NA	NA	inter
CUST_44368_PI429285431	0.0384593	2.36326	lncRNA	ncbi	>gi|408358026|ref|NR_073198.1| Homo sapiens death domain containing 1 (DTHD1), transcript variant 2, non-coding RNA	Chr4	36283237	36286236	+	NA	NA	NA	inter
CUST_44041_PI429285431	0.0282435	2.3622	lncRNA	ncbi	>gi|166235160|ref|NR_004862.1| Homo sapiens tRNA-yW synthesizing protein 5 (TYW5), transcript variant 2, non-coding RNA	Chr2	200793634	200796633	-	NA	hg19_refFlat_RQCD1:range=chr2:219433678-2194589995'pad=0,hg19_refFlat_RQCD1:range=chr2:219433678-2194589995'pad=0 3'pad=0 strand=+ repeatMasking=none,-39.50;hg19_refFlat_AMBRA1:range=chr11:46419000-465699305'pad=0,hg19_refFlat_AMBRA1:range=chr11:46419000-465699305'pad=0 3'pad=0 strand=- repeatMasking=none,-46.80;hg19_refFlat_SLC4A8:range=chr12:51844689-518740065'pad=0,hg19_refFlat_SLC4A8:range=ch…	NA	inter
CUST_31514_PI429285431	0.0494051	2.35897	lncRNA	NONCODERv3	>n338002|CR611171|mRNAlikelncRNA|Homosapiens|HumanlncRNA|JounralRNA|389|NULL|0.1599510|-0.2749928	chr22	27188218	27190340	+	NA	hg19_refFlat_NUDT7:range=chr16:77756480-777755495'pad=0,hg19_refFlat_NUDT7:range=chr16:77756480-777755495'pad=0 3'pad=0 strand=+ repeatMasking=none,-78.80;hg19_refFlat_OSTC:range=chr4:109571812-1095884135'pad=0,hg19_refFlat_OSTC:range=chr4:109571812-1095884135'pad=0 3'pad=0 strand=+ repeatMasking=none,-70.90;hg19_refFlat_UGT2A1:range=chr4:70455090-705133625'pad=0,hg19_refFlat_UGT2A1:range=chr4:70…	NA	inter
CUST_46811_PI429285431	0.0228366	2.35751	lncRNA	ncbi	>gi|336391096|ref|NR_038847.1| Homo sapiens long intergenic non-protein coding RNA 672 (LINC00672), non-coding RNA	Chr17	37081421	37084420	+	NA	hg19_refFlat_TUBGCP2:range=chr10:135093270-1351164455'pad=0,hg19_refFlat_TUBGCP2:range=chr10:135093270-1351164455'pad=0 3'pad=0 strand=- repeatMasking=none,-70.90;hg19_refFlat_TEX11:range=chrX:69748945-701173965'pad=0,hg19_refFlat_TEX11:range=chrX:69748945-701173965'pad=0 3'pad=0 strand=- repeatMasking=none,-77.10;hg19_refFlat_ITCH:range=chr20:32981618-330955995'pad=0,hg19_refFlat_ITCH:range=chr2…	NA	inter
CUST_3837_PI429285431	0.0258007	2.3565	lncRNA	gencode_v17	>transcript_id "ENST00000428273.1" | genecode_v17	chr10	131567108	131567602	+	MGMT	NA	chr10:131557108-131565783	inter
CUST_42323_PI429285431	0.0365704	2.35525	lncRNA	ensembl.GRCh37.72	>ENST00000364394 ncrna:snoRNA chromosome:GRCh37:4:152023209:152023280:1 gene:ENSG00000201264 gene_biotype:snoRNA transcript_biotype:snoRNA	chr4	152023209	152023280	+	RPS3A	NA	chr4:152020754-152025804	inner
CUST_15660_PI429285431	0.00201933	2.35494	lncRNA	lncipedia2.1	>lnc-SNURF-1:7	chr15	25271737	25274736	+	SNRPN	hg19_refFlat_RTBDN:range=chr19:12937421-129459125'pad=0,hg19_refFlat_RTBDN:range=chr19:12937421-129459125'pad=0 3'pad=0 strand=- repeatMasking=none,-71.30;hg19_refFlat_NEK4:range=chr3:52745793-528047625'pad=0,hg19_refFlat_NEK4:range=chr3:52745793-528047625'pad=0 3'pad=0 strand=- repeatMasking=none,-83.50;hg19_refFlat_DISC1:range=chr1:231762614-2321725775'pad=0,hg19_refFlat_DISC1:range=chr1:231762…	NA	inter
CUST_30640_PI429285431	0.0165544	2.35324	lncRNA	NONCODERv3	>n336004|X75692|mRNAlikelncRNA|Homosapiens|NULL|H-invitationalv7.5|HIT000323544|http://h-invitational.jp/hinv/spsoup/transcript_view?hit_id=HIT000323544|1.5505100|-0.3117580	chr6	56382368	56382648	-	DST	NA	chr6:56372368-56402316	inner
CUST_21683_PI429285431	0.00399922	2.34957	lncRNA	lncipedia2.1	>lnc-CLNS1A-1:1	chr11	77429226	77429791	-	RSF1	NA	chr11:77419226-77439456	inner
CUST_37148_PI429285431	0.0243198	2.34802	lncRNA	NONCODERv3	>n345586|NULL|lincRNA|Homosapiens|HumanlincRNA|ScriptureReconstructionLincRNAsByLuo[unpublished]|linc_luo_1135|NULL|-1.4551200|-0.3670801	chr3	37427706	37428894	+	C3orf35	hg19_refFlat_C8orf44:range=chr8:67589944-675921895'pad=0,hg19_refFlat_C8orf44:range=chr8:67589944-675921895'pad=0 3'pad=0 strand=+ repeatMasking=none,-58.30;hg19_refFlat_ZNF714:range=chr19:21281075-213011355'pad=0,hg19_refFlat_ZNF714:range=chr19:21281075-213011355'pad=0 3'pad=0 strand=+ repeatMasking=none,-62.90chr3:37440968-37442830	NA	inter
CUST_50631_PI429285431	0.0288001	2.34569	lncRNA	UCSC	>hg19_lincRNAsTranscripts_TCONS_l2_00003435 range=chr10:27220140-27233361 5'pad=0 3'pad=0 strand=- repeatMasking=none	chr10	27220140	27221288	-	NA	NA	NA	inter
CUST_51834_PI429285431	0.038543	2.34513	lncRNA	UCSC	>hg19_lincRNAsTranscripts_TCONS_l2_00013086 range=chr19:37176165-37178313 5'pad=0 3'pad=0 strand=- repeatMasking=none	chr19	37176165	37177852	-	ZNF567	NA	chr19:37180302-37188313	inter
CUST_45589_PI429285431	0.025009	2.34207	lncRNA	ncbi	>gi|219689089|ref|NR_003611.2| Homo sapiens BMS1 pseudogene 5 (BMS1P5), non-coding RNA	NW_003871068.1	1060848	1062082	+	NA	hg19_refFlat_TRIM5:range=chr11:5685318-57014075'pad=0,hg19_refFlat_TRIM5:range=chr11:5685318-57014075'pad=0 3'pad=0 strand=- repeatMasking=none,-82.20;hg19_refFlat_RTBDN:range=chr19:12937421-129459125'pad=0,hg19_refFlat_RTBDN:range=chr19:12937421-129459125'pad=0 3'pad=0 strand=- repeatMasking=none,-78.10;hg19_refFlat_CYB561D1:range=chr1:110036762-1100384895'pad=0,hg19_refFlat_CYB561D1:range=chr1:…	NA	Unknown
CUST_36281_PI429285431	0.0103364	2.34202	lncRNA	NONCODERv3	>n344810|NULL|lincRNA|Homosapiens|HumanlincRNA|ScriptureReconstructionLincRNAsByLuo[unpublished]|linc_luo_359|NULL|-1.3390700|-0.2842366	chr3	195402498	195405497	+	MUC20	hg19_refFlat_ANKDD1A:range=chr15:65204130-652495275'pad=0,hg19_refFlat_ANKDD1A:range=chr15:65204130-652495275'pad=0 3'pad=0 strand=+ repeatMasking=none,-75.90;hg19_refFlat_STAP2:range=chr19:4324130-43387505'pad=0,hg19_refFlat_STAP2:range=chr19:4324130-43387505'pad=0 3'pad=0 strand=- repeatMasking=none,-78.00;hg19_refFlat_LYRM4:range=chr6:5187029-52609665'pad=0,hg19_refFlat_LYRM4:range=chr6:518702…	NA	inter
CUST_39199_PI429285431	0.00334557	2.34055	lncRNA	NONCODERv3	>n385960|NULL|lncRNA|Homosapiens||UCSCGeneNoncode|uc009wlc.2||0.2692240|-0.1819504	chr1	149576452	149577681	+	LOC100288037	NA	chr1:149671871-149672242	inter
CUST_7310_PI429285431	0.0444757	2.33816	lncRNA	gencode_v17	>transcript_id "ENST00000461817.2" | genecode_v17	chr15	23263708	23263986	+	NA	NA	NA	inter
CUST_35897_PI429285431	0.0305218	2.33809	lncRNA	NONCODERv3	>n344552|NULL|lincRNA|Homosapiens|HumanlincRNA|ScriptureReconstructionLincRNAsByLuo[unpublished]|linc_luo_100|NULL|-1.2931500|-0.3004446	chr15	25253369	25256368	+	SNRPN	hg19_refFlat_TUBGCP2:range=chr10:135093270-1351164455'pad=0,hg19_refFlat_TUBGCP2:range=chr10:135093270-1351164455'pad=0 3'pad=0 strand=- repeatMasking=none,-76.70;hg19_refFlat_GDPD2:range=chrX:69644835-696529365'pad=0,hg19_refFlat_GDPD2:range=chrX:69644835-696529365'pad=0 3'pad=0 strand=+ repeatMasking=none,-82.50;hg19_refFlat_ZNF700:range=chr19:12037391-120610685'pad=0,hg19_refFlat_ZNF700:range=…	NA	inter
CUST_2751_PI429285431	0.0327682	2.33773	lncRNA	gencode_v17	>transcript_id "ENST00000437145.1" | genecode_v17	chr7	3122886	3123322	-	NA	NA	NA	inter
CUST_48997_PI429285431	0.0429523	2.33748	lncRNA	UCSC	>hg19_lincRNAsTranscripts_TCONS_l2_00019714 range=chr3:197319997-197354485 5'pad=0 3'pad=0 strand=- repeatMasking=none	chr3	197319997	197322489	-	NA	NA	NA	inter
CUST_35786_PI429285431	0.0148516	2.33479	lncRNA	NONCODERv3	>n344468|NULL|lincRNA|Homosapiens|HumanlincRNA|ScriptureReconstructionLincRNAsByLuo[unpublished]|linc_luo_16|NULL|-1.5709800|-0.1809724	chrX	62736789	62737181	+	NA	NA	NA	inter
CUST_11756_PI429285431	0.0220569	2.3339	lncRNA	lncipedia2.1	>lnc-OSTC-1:1	chr4	109591105	109592368	+	OSTC	NA	chr4:109581105-109588978	inter
CUST_5768_PI429285431	0.0336014	2.33381	lncRNA	gencode_v17	>transcript_id "ENST00000602532.1" | genecode_v17	chr17	19800037	19800511	-	AKAP10	NA	chr17:19808749-19810600	inter
CUST_39005_PI429285431	0.0463829	2.33203	lncRNA	NONCODERv3	>n385305|NULL|lncRNA|Homosapiens||UCSCGeneNoncode|uc003wfy.3||4.9523300|-0.1684094	chr7	149244244	149246386	-	NA	NA	NA	inter
CUST_37474_PI429285431	0.0038408	2.33148	lncRNA	NONCODERv3	>n345932|NULL|lincRNA|Homosapiens|HumanlincRNA|ScriptureReconstructionLincRNAsByLuo[unpublished]|linc_luo_1481|NULL|-1.2798000|-0.2374815	chr1	40022746	40023262	-	PABPC4	NA	chr1:40026485-40035335	inter
LNCA_21_P0006748	0.00457809	2.32954	lncRNA	Agilent_HUMAN_G3V2	ENST00000432530	chr10	38064381	38064440	-	NA	NA	NA	Unknown
CUST_15507_PI429285431	0.0495887	2.32902	lncRNA	lncipedia2.1	>lnc-RSBN1L-1:1	chr7	77300567	77301146	+	NA	hg19_refFlat_DISC1:range=chr1:231762614-2319907715'pad=0,hg19_refFlat_DISC1:range=chr1:231762614-2319907715'pad=0 3'pad=0 strand=+ repeatMasking=none,-72.50;hg19_refFlat_MYL10:range=chr7:101256755-1012723985'pad=0,hg19_refFlat_MYL10:range=chr7:101256755-1012723985'pad=0 3'pad=0 strand=- repeatMasking=none,-76.60;hg19_refFlat_TSFM:range=chr12:58176585-581903665'pad=0,hg19_refFlat_TSFM:range=chr12:…	NA	inter
CUST_12522_PI429285431	0.00518592	2.32838	lncRNA	lncipedia2.1	>lnc-COPS4-1:2	chr4	84010198	84010425	+	PLAC8	NA	chr4:84011201-84020394	inter
CUST_29461_PI429285431	0.0104515	2.3276	lncRNA	NONCODERv3	>n332870|AF085940|mRNAlikelncRNA|Homosapiens|NULL|H-invitationalv7.5|HIT000066819_04|http://h-invitational.jp/hinv/spsoup/transcript_view?hit_id=HIT000066819_04|-1.3185100|-0.4298448	chr15	28839837	28840248	+	NA	hg19_refFlat_IL12RB1:range=chr19:18182019-181976335'pad=0,hg19_refFlat_IL12RB1:range=chr19:18182019-181976335'pad=0 3'pad=0 strand=- repeatMasking=none,-80.30;hg19_refFlat_ZNF410:range=chr14:74364945-743982125'pad=0,hg19_refFlat_ZNF410:range=chr14:74364945-743982125'pad=0 3'pad=0 strand=+ repeatMasking=none,-83.10;hg19_refFlat_ZNF573:range=chr19:38229393-382492365'pad=0,hg19_refFlat_ZNF573:range=…	NA	inter
CUST_233_PI429285431	0.0419728	2.32693	lncRNA	gencode_v17	>transcript_id "ENST00000449958.1" | genecode_v17	chr1	53832340	53833189	-	NA	hg19_refFlat_C14orf178:range=chr14:78235743-782360215'pad=0,hg19_refFlat_C14orf178:range=chr14:78235743-782360215'pad=0 3'pad=0 strand=+ repeatMasking=none,-75.30;hg19_refFlat_C14orf178:range=chr14:78227386-782360215'pad=0,hg19_refFlat_C14orf178:range=chr14:78227386-782360215'pad=0 3'pad=0 strand=+ repeatMasking=none,-75.30;hg19_refFlat_RAB43:range=chr3:128811357-1288403325'pad=0,hg19_refFlat_RAB…	NA	inter
CUST_39197_PI429285431	0.00843	2.32638	lncRNA	NONCODERv3	>n385954|NULL|lncRNA|Homosapiens||UCSCGeneNoncode|uc009wjz.1||-0.7103470|-0.1789136	chr1	147907097	147907720	-	PPIAL4A	hg19_refFlat_FAM91A1:range=chr8:124780943-1248249445'pad=0,hg19_refFlat_FAM91A1:range=chr8:124780943-1248249445'pad=0 3'pad=0 strand=+ repeatMasking=none,-79.50chr1:147907427-147941980	NA	inter
CUST_16260_PI429285431	0.0112838	2.32498	lncRNA	lncipedia2.1	>lnc-SUCLA2-1:1	chr13	48513402	48513832	-	SUCLA2	NA	chr13:48516791-48523514	inter
CUST_363_PI429285431	0.0242113	2.32267	lncRNA	gencode_v17	>transcript_id "ENST00000413231.1" | genecode_v17	chr1	113550876	113551252	+	NA	NA	NA	inter
CUST_50634_PI429285431	0.0355655	2.32239	lncRNA	UCSC	>hg19_lincRNAsTranscripts_TCONS_l2_00003437 range=chr10:27220142-27232562 5'pad=0 3'pad=0 strand=- repeatMasking=none	chr10	27226142	27227625	-	NA	hg19_refFlat_PKP2:range=chr12:32945358-330496655'pad=0,hg19_refFlat_PKP2:range=chr12:32945358-330496655'pad=0 3'pad=0 strand=- repeatMasking=none,-76.90	NA	inter
LNCA_21_P0003627	0.00965427	2.32126	lncRNA	Agilent_HUMAN_G3V2	THC2525615	chr4	84010335	84010394	+	NA	NA	NA	Unknown
CUST_46670_PI429285431	0.0164611	2.32035	lncRNA	ncbi	>gi|153791676|ref|NR_003610.1| Homo sapiens pyridoxal-dependent decarboxylase domain containing 2, pseudogene (PDXDC2P), non-coding RNA	Chr16	70013200	70014497	-	NA	NA	NA	inter
CUST_2302_PI429285431	0.0400378	2.31651	lncRNA	gencode_v17	>transcript_id "ENST00000512693.1" | genecode_v17	chr5	108572821	108575820	-	PJA2	hg19_refFlat_JAM2:range=chr21:27012134-270866175'pad=0,hg19_refFlat_JAM2:range=chr21:27012134-270866175'pad=0 3'pad=0 strand=+ repeatMasking=none,-66.40;hg19_refFlat_ISY1:range=chr3:128848924-1288798185'pad=0,hg19_refFlat_ISY1:range=chr3:128848924-1288798185'pad=0 3'pad=0 strand=- repeatMasking=none,-84.10;hg19_refFlat_TSFM:range=chr12:58176585-581903665'pad=0,hg19_refFlat_TSFM:range=chr12:581765…	NA	inter
CUST_11575_PI429285431	0.0449213	2.31632	lncRNA	lncipedia2.1	>lnc-MEF2A-1:1	chr15	100379288	100379611	+	NA	NA	NA	inter
CUST_14599_PI429285431	0.0349339	2.31561	lncRNA	lncipedia2.1	>lnc-TBC1D19-4:3	chr4	26860235	26861098	+	STIM2	NA	chr4:26862313-26870539	inter
LNCA_21_P0004862	0.0247193	2.31083	lncRNA	Agilent_HUMAN_G3V2	AK125456	chr6	58189280	58189339	-	NA	NA	NA	Unknown
LNCA_21_P0008990	0.00816977	2.3104	lncRNA	Agilent_HUMAN_G3V2	TCONS_00024500	chr16	87153364	87153423	+	NA	NA	NA	Unknown
CUST_8811_PI429285431	0.00912524	2.31031	lncRNA	lncipedia2.1	>lnc-KIAA0664-1:1	chr17	2576324	2577208	-	PAFAH1B1	hg19_refFlat_CAGE1:range=chr6:7329398-73874065'pad=0,hg19_refFlat_CAGE1:range=chr6:7329398-73874065'pad=0 3'pad=0 strand=- repeatMasking=none,-88.30;hg19_refFlat_CYB561D1:range=chr1:110036762-1100383975'pad=0,hg19_refFlat_CYB561D1:range=chr1:110036762-1100383975'pad=0 3'pad=0 strand=+ repeatMasking=none,-83.70;hg19_refFlat_JAM2:range=chr21:27012134-270866175'pad=0,hg19_refFlat_JAM2:range=chr21:27…	NA	inner
CUST_28248_PI429285431	0.00269844	2.30941	lncRNA	NONCODERv3	>n325541|NULL|mRNAlikelncRNA|Homosapiens|vegalncRNA|GENCODE|OTTHUMT00000255324|http://vega.sanger.ac.uk/Homo_sapiens/Transcript/Summary?db=core;t=OTTHUMT00000255324|-0.9704960|-0.1713737	chr17	65469497	65470161	+	PITPNC1	hg19_refFlat_ST6GAL2:range=chr2:107429598-1074604335'pad=0,hg19_refFlat_ST6GAL2:range=chr2:107429598-1074604335'pad=0 3'pad=0 strand=- repeatMasking=none,-78.10chr17:65459497-65501274	NA	inner
CUST_39349_PI429285431	0.0374279	2.30858	lncRNA	NONCODERv3	>n386437|NULL|lncRNA|Homosapiens||UCSCGeneNoncode|uc010kzt.1||3.2204000|-0.3445733	chr7	64498731	64501730	+	NA	hg19_refFlat_ISY1:range=chr3:128848924-1288798185'pad=0,hg19_refFlat_ISY1:range=chr3:128848924-1288798185'pad=0 3'pad=0 strand=- repeatMasking=none,-84.60;hg19_refFlat_OR1J1:range=chr9:125239237-1252402055'pad=0,hg19_refFlat_OR1J1:range=chr9:125239237-1252402055'pad=0 3'pad=0 strand=- repeatMasking=none,-78.90;hg19_refFlat_FBLIM1:range=chr1:16091479-161015265'pad=0,hg19_refFlat_FBLIM1:range=chr1:…	NA	inter
CUST_21791_PI429285431	0.0118765	2.30849	lncRNA	lncipedia2.1	>lnc-PCYOX1L-1:1	chr5	148754272	148754859	+	IL17B	NA	chr5:148753830-148758838	inner
CUST_17952_PI429285431	0.0337288	2.30844	lncRNA	lncipedia2.1	>lnc-AL137145.1-2:9	chr10	6635912	6638153	+	NA	NA	NA	inter
LNCA_21_P0014375	0.0257185	2.30786	lncRNA	Agilent_HUMAN_G3V2	XR_109504	chr19	58308603	58308662	+	NA	NA	NA	Unknown
CUST_35385_PI429285431	0.00481437	2.30605	lncRNA	NONCODERv3	>n342435|BC017357|mRNAlikelncRNA|Homosapiens|HumanlncRNA|JounralRNA|4928|NULL|0.9547010|-0.1622040	chr19	53901194	53903237	+	ZNF765	NA	chr19:53898397-53915262	inner
CUST_35691_PI429285431	0.0185796	2.3052	lncRNA	NONCODERv3	>n342851|BC034707|mRNAlikelncRNA|Homosapiens|HumanlncRNA|JounralRNA|5355|NULL|-1.0109700|-0.3122720	chr9	2759255	2760872	-	NA	NA	NA	inter
CUST_50635_PI429285431	0.0187601	2.30368	lncRNA	UCSC	>hg19_lincRNAsTranscripts_TCONS_l2_00003439 range=chr10:27220145-27229265 5'pad=0 3'pad=0 strand=- repeatMasking=none	chr10	27220145	27221636	-	NA	NA	NA	inter
CUST_12021_PI429285431	0.0241237	2.30225	lncRNA	lncipedia2.1	>lnc-CRYBA4-1:49	chr22	27247872	27248198	+	NA	NA	NA	inter
CUST_28944_PI429285431	0.0101727	2.30162	lncRNA	NONCODERv3	>n326373|NULL|mRNAlikelncRNA|Homosapiens|vegalncRNA|GENCODE|OTTHUMT00000046191|http://vega.sanger.ac.uk/Homo_sapiens/Transcript/Summary?db=core;t=OTTHUMT00000046191|-1.1496900|-0.4160944	chr1	154227804	154228204	+	UBAP2L	NA	chr1:154217804-154243329	inner
CUST_8360_PI429285431	0.0138887	2.30093	lncRNA	lncipedia2.1	>lnc-SPRYD3-1:4	chr12	53440637	53442296	-	EIF4B	hg19_refFlat_EIF4B:range=chr12:53400268-534340075'pad=0,hg19_refFlat_EIF4B:range=chr12:53400268-534340075'pad=0 3'pad=0 strand=+ repeatMasking=none,-92.80chr12:53430637-53435993	NA	inner
CUST_1643_PI429285431	0.0125678	2.30044	lncRNA	gencode_v17	>transcript_id "ENST00000451216.2" | genecode_v17	chr3	195428510	195428823	+	NA	NA	NA	inter
LNCA_21_P0007664	0.0243206	2.30014	lncRNA	Agilent_HUMAN_G3V2	TCONS_00020643	chr12	127636993	127637052	+	NA	NA	NA	Unknown
CUST_39023_PI429285431	0.0159705	2.29579	lncRNA	NONCODERv3	>n385362|NULL|lncRNA|Homosapiens||UCSCGeneNoncode|uc003wwb.1||-0.0394349|-0.3113151	chr8	12435814	12438797	+	NA	hg19_refFlat_NPC1L1:range=chr7:44553046-445808585'pad=0,hg19_refFlat_NPC1L1:range=chr7:44553046-445808585'pad=0 3'pad=0 strand=- repeatMasking=none,-63.70;hg19_refFlat_MRPL10:range=chr17:45901571-459065865'pad=0,hg19_refFlat_MRPL10:range=chr17:45901571-459065865'pad=0 3'pad=0 strand=- repeatMasking=none,-74.30;hg19_refFlat_C8orf44:range=chr8:67589944-675921895'pad=0,hg19_refFlat_C8orf44:range=chr…	NA	inter
CUST_18300_PI429285431	0.0401226	2.29564	lncRNA	lncipedia2.1	>lnc-PPIAL4G-1:1	chr1	143721045	143721464	-	NA	hg19_refFlat_FAM91A1:range=chr8:124780943-1248249445'pad=0,hg19_refFlat_FAM91A1:range=chr8:124780943-1248249445'pad=0 3'pad=0 strand=+ repeatMasking=none,-83.40	NA	inter
CUST_48224_PI429285431	0.0135871	2.29546	lncRNA	UCSC	>hg19_lincRNAsTranscripts_TCONS_l2_00001492 range=chr1:142805370-142891006 5'pad=0 3'pad=0 strand=- repeatMasking=none	chr1	142805370	142805698	-	NA	NA	NA	inter
CUST_31379_PI429285431	0.00799644	2.29533	lncRNA	NONCODERv3	>n337845|BC030766|mRNAlikelncRNA|Homosapiens|HumanlncRNA|JounralRNA|228|NULL|-0.9822980|-0.2882373	chrX	123509752	123510863	-	ODZ1	NA	chrX:123509753-123520852	inner
CUST_33113_PI429285431	0.0481747	2.29527	lncRNA	NONCODERv3	>n339801|CR622189|mRNAlikelncRNA|Homosapiens|HumanlncRNA|JounralRNA|2248|NULL|-0.9379520|-0.2035247	chr18	13542302	13543592	+	C18orf1	NA	chr18:13532302-13553593	inner
CUST_31535_PI429285431	0.0433422	2.29496	lncRNA	NONCODERv3	>n338023|AK097722|mRNAlikelncRNA|Homosapiens|HumanlncRNA|JounralRNA|410|NULL|-0.9847830|-0.3172468	chr1	84267198	84269196	-	TTLL7	NA	chr1:84335057-84336229	inter
CUST_46752_PI429285431	0.00391837	2.29444	lncRNA	ncbi	>gi|325197165|ref|NR_037924.1| Homo sapiens FAM18B2-CDRT4 readthrough (FAM18B2-CDRT4), transcript variant 2, non-coding RNA	NA	NA	NA	NA	NA	NA	NA	Unknown
CUST_8606_PI429285431	0.043557	2.29372	lncRNA	lncipedia2.1	>lnc-DHRS12-1:1	chr13	52422152	52423277	-	NA	hg19_refFlat_SEPN1:range=chr1:26126722-261422095'pad=0,hg19_refFlat_SEPN1:range=chr1:26126722-261422095'pad=0 3'pad=0 strand=+ repeatMasking=none,-48.91	NA	inter
CUST_39004_PI429285431	0.0430131	2.29335	lncRNA	NONCODERv3	>n385304|NULL|lncRNA|Homosapiens||UCSCGeneNoncode|uc003wfx.2||3.5549900|-0.1968885	chr7	149247244	149247826	-	NA	NA	NA	inter
CUST_48149_PI429285431	0.0283441	2.29171	lncRNA	ncbi	>gi|410169909|ref|XR_172429.1| PREDICTED: Homo sapiens uncharacterized LOC283575 (LOC283575), misc_RNA	NA	NA	NA	NA	NA	hg19_refFlat_ZNF714:range=chr19:21281075-213011355'pad=0,hg19_refFlat_ZNF714:range=chr19:21281075-213011355'pad=0 3'pad=0 strand=+ repeatMasking=none,-72.60	NA	Unknown
LNCA_21_P0012196	0.00551741	2.28953	lncRNA	Agilent_HUMAN_G3V2	THC2650344	chr21	29815126	29815185	-	NA	NA	NA	Unknown
CUST_16109_PI429285431	0.0286524	2.2891	lncRNA	lncipedia2.1	>lnc-C9orf156-2:1	chr9	100658088	100659111	-	C9orf156	hg19_refFlat_CNGA1:range=chr4:47938438-479731175'pad=0,hg19_refFlat_CNGA1:range=chr4:47938438-479731175'pad=0 3'pad=0 strand=- repeatMasking=none,-75.90;hg19_refFlat_NOS3:range=chr7:150690892-1507003765'pad=0,hg19_refFlat_NOS3:range=chr7:150690892-1507003765'pad=0 3'pad=0 strand=+ repeatMasking=none,-71.70chr9:100666772-100668103	NA	inter
CUST_30700_PI429285431	0.0392468	2.28836	lncRNA	NONCODERv3	>n336201|X93716|mRNAlikelncRNA|Homosapiens|NULL|H-invitationalv7.5|HIT000324666|http://h-invitational.jp/hinv/spsoup/transcript_view?hit_id=HIT000324666|2.5535000|-0.0787140	chr2	89160396	89160740	-	NA	NA	NA	inter
CUST_34536_PI429285431	0.0261392	2.28757	lncRNA	NONCODERv3	>n341415|BX647732|mRNAlikelncRNA|Homosapiens|HumanlncRNA|JounralRNA|3885|NULL|-0.5537880|-0.3082556	chr8	10716594	10716960	-	NA	NA	NA	inter
[truncated: 287 more rows]
